# Supplementary material for: A rapid systematic review of measures to protect older people in long-term care facilities from COVID-19
Source: PubMed Central journal article supplement — BMJ Open. 2021 Oct 17;11(10):e047012. doi: 10.1136/bmjopen-2020-047012 (PMC8523961; doi:10.1136/bmjopen-2020-047012), 2021-10-17
Supplement: bmjopen-2020-047012.draft_revisions.pdf [file bmjopen-2020-047012.draft_revisions.pdf]

# BMJ Open

BMJ Open is committed to open peer review. As part of this commitment we make the peer review history of every article we publish publicly available.

When an article is published we post the peer reviewers' comments and the authors' responses online. We also post the versions of the paper that were used during peer review. These are the versions that the peer review comments apply to.

The versions of the paper that follow are the versions that were submitted during the peer review process. They are not the versions of record or the final published versions. They should not be cited or distributed as the published version of this manuscript.

BMJ Open is an open access journal and the full, final, typeset and author-corrected version of record of the manuscript is available on our site with no access controls, subscription charges or pay-per-view fees (<http://bmjopen.bmj.com>).

If you have any questions on BMJ Open's open peer review process please email [info.bmjopen@bmj.com](mailto:info.bmjopen@bmj.com)

# BMJ Open

## A rapid systematic review of measures to protect older people in long term care facilities from COVID-19

|                               |                                                                                                                                                                                                                                                                                      |
|-------------------------------|--------------------------------------------------------------------------------------------------------------------------------------------------------------------------------------------------------------------------------------------------------------------------------------|
| Journal:                      | <i>BMJ Open</i>                                                                                                                                                                                                                                                                      |
| Manuscript ID                 | bmjopen-2020-047012                                                                                                                                                                                                                                                                  |
| Article Type:                 | Original research                                                                                                                                                                                                                                                                    |
| Date Submitted by the Author: | 17-Nov-2020                                                                                                                                                                                                                                                                          |
| Complete List of Authors:     | Frazer, Kathleen; University College Dublin<br>Mitchell, Lachlan; University College Dublin,<br>Stokes, Diarmuid; University College Dublin<br>Lacey, Ella; University College Dublin<br>Crowley, Eibhlin; University College Dublin<br>Kelleher, Cecily; University College Dublin, |
| Keywords:                     | COVID-19, Public health < INFECTIOUS DISEASES, GERIATRIC MEDICINE                                                                                                                                                                                                                    |
|                               |                                                                                                                                                                                                                                                                                      |

SCHOLARONE™  
Manuscripts

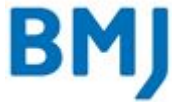

I, the Submitting Author has the right to grant and does grant on behalf of all authors of the Work (as defined in the below author licence), an exclusive licence and/or a non-exclusive licence for contributions from authors who are: i) UK Crown employees; ii) where BMJ has agreed a CC-BY licence shall apply, and/or iii) in accordance with the terms applicable for US Federal Government officers or employees acting as part of their official duties; on a worldwide, perpetual, irrevocable, royalty-free basis to BMJ Publishing Group Ltd ("BMJ") its licensees and where the relevant Journal is co-owned by BMJ to the co-owners of the Journal, to publish the Work in this journal and any other BMJ products and to exploit all rights, as set out in our [licence](#).

The Submitting Author accepts and understands that any supply made under these terms is made by BMJ to the Submitting Author unless you are acting as an employee on behalf of your employer or a postgraduate student of an affiliated institution which is paying any applicable article publishing charge ("APC") for Open Access articles. Where the Submitting Author wishes to make the Work available on an Open Access basis (and intends to pay the relevant APC), the terms of reuse of such Open Access shall be governed by a Creative Commons licence – details of these licences and which [Creative Commons](#) licence will apply to this Work are set out in our licence referred to above.

Other than as permitted in any relevant BMJ Author's Self Archiving Policies, I confirm this Work has not been accepted for publication elsewhere, is not being considered for publication elsewhere and does not duplicate material already published. I confirm all authors consent to publication of this Work and authorise the granting of this licence.

1 A rapid systematic review of measures to protect older people in long term care facilities from  
2 COVID-19

3 Kate Frazer<sup>1\*</sup>, Lachlan Mitchell<sup>2,3\*</sup>, Diarmuid Stokes<sup>4</sup>, Ella Lacey<sup>5</sup>, Eibhlin Crowley<sup>6</sup>, Cecily  
4 Kelleher<sup>2,3</sup>.

5 1. School of Nursing, Midwifery and Health Systems, University College Dublin, Belfield,  
6 Dublin 4, Ireland

7 2. National Nutrition Surveillance Centre, University College Dublin, Belfield, Dublin 4, Ireland

8 3. School of Public Health, Physiotherapy and Sport Science, University College Dublin,  
9 Belfield, Dublin 4, Ireland

10 4. Health Sciences Library, University College Dublin, Belfield, Dublin 4, Ireland

11 5. School of Medicine, University College Dublin, Belfield, Dublin 4, Ireland

12 6. Office for Health Affairs, College of Health and Agricultural Science, University College  
13 Dublin, Belfield, Dublin 4, Ireland

14 \*Equal contribution

15 Corresponding author: Lachlan Mitchell

16 [Lachlan.mitchell@ucd.ie](mailto:Lachlan.mitchell@ucd.ie)

17 National Nutrition Surveillance Centre, University College Dublin, Belfield, Dublin 4, Ireland

18 Running title: Measures to protect older people from COVID-19

19 Word count: 2451

20 Abstract word count: 261

21 Keywords: Coronavirus, COVID-19, nursing homes, transmission

1  
2  
3 **24 Abstract**  
4

5  
6 **25 Objectives:** The global COVID-19 pandemic produced large-scale health and economic  
7  
8 **26 complications.** Older people and those with comorbidities are particularly vulnerable to this virus,  
9  
10 **27 with nursing homes and long term care facilities experiencing significant morbidity and mortality**  
11  
12 **28 associated with COVID-19 outbreaks.** The aim of this rapid systematic review was to investigate  
13  
14 **29 measures implemented in long term care facilities to reduce transmission of COVID-19 and their**  
15  
16 **30 effect on morbidity and mortality of residents, staff, and visitors.**

17  
18  
19 **31 Setting:** Long term care facilities.  
20

21  
22 **32 Participants:** Residents, staff and visitors of facilities.  
23

24  
25 **33 Primary and secondary outcome measures:** Databases (including MedRXiv pre-published repository)  
26  
27 **34 were systematically searched to identify studies reporting assessment of interventions to reduce**  
28  
29 **35 transmission of COVID-19 in nursing homes among residents, staff, or visitors.** Outcome measures  
30  
31 **36 include facility characteristics, morbidity data, case fatalities, and transmission rates.** Due to study  
32  
33 **37 quality and heterogeneity, no meta-analysis was conducted.**

34  
35  
36 **38 Results:** The search yielded 1414 articles, with 38 studies included. Reported interventions include  
37  
38 **39 mass testing, use of personal protective equipment, symptom screening, visitor restrictions, hand**  
39  
40 **40 hygiene and droplet/contact precautions, and resident cohorting.** Prevalence rates ranged from 1.2-  
41  
42 **41 85.4% in residents and 0.6-62.6% in staff.** Mortality rates ranged from 5.3-55.3% in residents.  
43

44  
45 **42 Conclusions:** Novel evidence in this review details the impact of facility size, availability of staff and  
46  
47 **43 practices of operating between multiple facilities, and for-profit status of facilities as factors**  
48  
49 **44 contributing to the size and number of COVID-19 outbreaks.** No causative relationships can be  
50  
51 **45 determined; however, this review provides evidence of interventions that reduce transmission of**  
52  
53 **46 COVID-19 in long term care facilities.**

54  
55  
56 **47 Trial registration:** The protocol is registered on PROSPERO (CRD42020191569).  
57  
58  
59 **48**  
60

1  
2  
3 49 **Strengths and Limitations of the Study**  
4  
5

- 6 50 • Evidence from 38 studies identifies the measures taken to reduce transmission of COVID-19  
7  
8 51 in long term care facilities.  
9  
10 52 • No limitations were placed on study type, and all languages were eligible for inclusion.  
11  
12 53 • Study quality was formally examined using the MMAT tool.  
13  
14 54 • Due to heterogeneity of included studies, meta-analysis was not able to be performed.  
15  
16  
17 55  
18  
19  
20 56  
21  
22  
23 57  
24  
25  
26 58  
27  
28  
29 59  
30  
31 60  
32  
33  
34 61  
35  
36  
37 62  
38  
39  
40 63  
41  
42 64  
43  
44  
45 65  
46  
47  
48 66  
49  
50  
51 67  
52  
53 68  
54  
55  
56 69  
57  
58  
59 70  
60

For peer review only

## 71 **Introduction**

72 Severe Acute Respiratory Syndrome Coronavirus-2 (SARS-CoV-2) is a novel virus, first identified in  
73 China in 2019, resulting in the current global pandemic in 2020.<sup>1</sup> The ensuing disease associated with  
74 infection from SARS-CoV-2, termed COVID-19, has produced large-scale public health and  
75 worldwide economic effects.<sup>2</sup>

76 The virus spreads between people through close contact and droplet transmission (coughs and  
77 sneezes). While most infected people will experience mild flu-like symptoms, others may become  
78 seriously ill and die.<sup>3</sup> At-risk groups include older people and those with underlying medical  
79 conditions, while men appear to have more susceptibility than women. Symptom severity varies;  
80 several individuals remain asymptomatic, others experience fever, cough, sore throat, general  
81 weakness, and fatigue, while more severe respiratory illnesses and infections may result, which can be  
82 fatal.<sup>4,5</sup> Deterioration in clinical presentations can occur rapidly, leading to poorer health outcomes.  
83 Anosmia and ageusia are reported in evidence from South Korea, China, and Italy in patients with  
84 confirmed SARS-CoV-2 infection, in some cases in the absence of other symptoms.<sup>6</sup>

85 The World Health Organization (WHO) declared the COVID-19 outbreak constituted a Public Health  
86 Emergency of International Concern (PHEIC) on January 30, 2020.<sup>5</sup> Two primary goals of action  
87 were 1) to accelerate innovative research to help contain the spread and facilitate care for all affected,  
88 and 2) to support research priorities globally the learning from the pandemic response for  
89 preparedness. Globally, up to October 5, 2020, there are 35 247 104 cases of COVID-19 (following  
90 the applied case definitions and testing strategies in the affected countries) including 1 038 069  
91 deaths.<sup>7</sup> Within Europe, over 5 431 510 cases are reported, with 226 869 deaths<sup>7</sup>

92 Presently there is no vaccine; therefore, preventing and limiting transmission is advocated.

93 International and national evidence mandates physical distancing, regular hand hygiene and cough  
94 etiquette, and limiting touching eyes, nose or mouth; in addition to regular cleaning of surfaces.<sup>8</sup>

95 As noted older people are an at-risk group for COVID-19, and throughout the pandemic, the impact  
96 on this population has resulted in increased mortality, specifically those living in long term care

1  
2  
3 97 facilities (LTCF) where a high proportion of outbreaks with increased rates of morbidity and case  
4  
5 98 fatality in residents are recorded.<sup>9</sup> In several EU/EEA countries, LTCF deaths among residents,  
6  
7 99 associated with COVID-19, account for 37% to 66% of all COVID-19-related fatalities.<sup>9</sup> The specific  
8  
9 100 rationale for their increased susceptibility is less clear. The United Nations (UN) (2020) acknowledge  
10  
11 101 that COVID-19 exposes the inequalities in society and the failures expressed in the 2030 Agenda for  
12  
13 102 Sustainable Development. The UN report the disproportionate fatality rates in those aged over 80  
14  
15 103 years as five times the global average<sup>10</sup> and suggest a need for a more *inclusive, equitable and age-*  
16  
17 104 *friendly society, anchored in human rights* (p.16).<sup>11</sup>

18  
19  
20 105 The aim of this rapid review of the literature was to assess the extent to which measures implemented  
21  
22 106 in LTCF reduced transmission of COVID-19 (SARS-CoV-2) among residents, staff, and visitors, and  
23  
24 107 the effect of these measures on morbidity and mortality outcomes.

## 25 108 **Methods**

26  
27  
28 109 The protocol is registered on PROSPERO (CRD42020191569)<sup>12</sup> and reporting follows PRISMA  
29  
30 110 guidelines.<sup>13</sup> Ethical approval was not required for this systematic review.

### 31 111 *Search strategy*

32  
33  
34 112 Search strategies comprised search terms both for keywords and controlled-vocabulary search terms  
35  
36 113 MESH and Emtree (see Supplementary Table 1 for full search terms). EMBASE (via OVID),  
37  
38 114 PubMed (via OVID), Cumulative Index to Nursing and Allied Health Literature (CINAHL),  
39  
40 115 Cochrane Database and Repository, and MedRxiv pre-published databases were searched. No time  
41  
42 116 limits were imposed, and databases were searched up to July 27, 2020. Reference lists of included  
43  
44 117 evidence were checked for further articles.

### 45 118 *Eligibility criteria*

46  
47  
48 119 All study designs (experimental, observational, and qualitative) are included, and no exclusions  
49  
50 120 placed on language. Included studies report an assessment of measures to reduce transmission of  
51  
52 121 COVID-19 (including SARS or MERS) in residents, employees, or visitors of LTCF. To provide as  
53  
54 122 comprehensive a review of the evidence we included any intervention implemented to reduce the



1  
2  
3 123 transmission of COVID-19 in long-term residential care facilities, including facility measures, social  
4  
5 124 distancing, use of personal protective equipment, and hand hygiene.  
6  
7

8 125 *Primary outcome measures*  
9

10  
11 126 Primary outcome measures are morbidity data, case fatality rates, reductions in reported transmission  
12  
13 127 rates, and facility characteristics associated with COVID-19 incidence.  
14

15  
16 128 *Selection of studies and data extraction*  
17

18  
19 129 Two authors developed search strings (DS & KF); all database searches were completed by one  
20  
21 130 author (DS) (Supplementary Table 1). Following de-duplication, references were uploaded into  
22  
23 131 Covidence management platform (LM), and two authors independently screened all titles and  
24  
25 132 abstracts (LM & KF). Full texts of all potentially eligible studies were independently reviewed by two  
26  
27 133 authors (LM & KF). Disagreements were resolved by discussion with a third author (CK). Data from  
28  
29 134 included studies were independently extracted in duplicate (LM & KF). A data extraction form was  
30  
31 135 developed and modified from documents used previously by authors (KF & CK). Extracted data  
32  
33 136 included study characteristics (title, lead author, year of publication, country, study setting, study  
34  
35 137 design), description of the intervention, number and characteristics of participants, outcomes, duration  
36  
37 138 of follow-up, sources of funding, peer review status). Study design (required for review of quality)  
38  
39 139 was independently assessed by two authors (LM & KF), with disagreements resolved by a third  
40  
41 140 author (CK).  
42  
43

44 141 *Assessment of Quality*  
45

46  
47 142 Two review authors (LM & EL) independently assessed the quality of included studies using Mixed  
48  
49 143 Methods Assessment Tool (MMAT),<sup>14</sup> with disagreements resolved by a third author (KF) and  
50  
51 144 discussed with the lead author (CK) (Supplementary Table 2). The MMAT is used widely and  
52  
53 145 considered a valid indicator of methodological quality using instruments for non-randomised and  
54  
55 146 descriptive studies.  
56  
57

58 147 *Data synthesis*  
59  
60

1  
2  
3 148 Meta-analysis was not possible due to heterogeneity in study designs, participants, outcomes, and  
4  
5 149 nature of the interventions and no attempt was made to transform statistical data. The SWiM criteria<sup>15</sup>  
6  
7 150 guide a narrative summary, with data presented in tabular format and subgroup reporting of  
8  
9 151 population groups.

### 12 152 *Patient and public involvement*

15 153 No patients were involved in this study.

## 18 154 **Results**

21 155 We identified 1414 articles, and 131 full-text articles were selected for review. After an evaluation  
22 156 against our inclusion criteria, 38 studies (40 papers) are included in this systematic review (Figure 1).

### 25 157 *Study characteristics*

28 158 Geographically we report evidence from eleven countries, the majority (20 studies) are from USA<sup>16-35</sup>  
29 159 and UK.<sup>36-40</sup> We report evidence from Canada,<sup>41-43</sup> France,<sup>44,45</sup> Hong Kong,<sup>46,47</sup> Belgium,<sup>48</sup> Germany,<sup>49</sup>  
30 160 Ireland,<sup>50</sup> Japan,<sup>51</sup> Korea,<sup>52</sup> and Spain<sup>53</sup> (Table 1).

### 35 161 *Infection control measures*

38 162 Twenty studies report the nature of LTCFs related with outbreaks and transmission of COVID-19  
39 163 infection (Table 2; <sup>16,23,28,29,31,33,35-39,41-43,45-47,50-52</sup>). Thirty studies (Table 3a; <sup>17-29,32-34,37-43,45-50,53</sup>) report  
40 164 evidence of measures to reduce transmission of COVID-19 in long-term residential care facilities for  
41 165 residents, 25 studies (Table 3b; <sup>17-22,24,26-30,32,34,38,39,42-48,50,53</sup>) report evidence for employee outcomes,  
42 166 and two studies report evidence for visitors (Table 3c; <sup>28,47</sup>).

49 167 A variety of infection control measures are described (Tables 1 and 3a-c) including: mass  
50 168 testing/point-prevalence testing (22 studies; <sup>17,19-22,25-30,32-34,38,39,44,45,48-50,53</sup>), use of personal protective  
51 169 equipment (10 studies; <sup>17,18,20,25,28,29,32,45,47,49</sup>), screening of residents, staff, or visitors for symptoms (8  
52 170 studies; <sup>18-20,23,25,27,29,32</sup>), restrictions on visitor entry (10 studies; <sup>18-20,25,27,29,32,45,49,53</sup>), hand hygiene and  
53 171 contact and droplet precautions (6 studies; <sup>19,23,25,32,45,46</sup>), and cohorting/isolation of residents (11

1  
2  
3  
4  
5  
6  
7  
8  
9  
10  
11  
12  
13  
14  
15  
16  
17  
18  
19  
20  
21  
22  
23  
24  
25  
26  
27  
28  
29  
30  
31  
32  
33  
34  
35  
36  
37  
38  
39  
40  
41  
42  
43  
44  
45  
46  
47  
48  
49  
50  
51  
52  
53  
54  
55  
56  
57  
58  
59  
60

172 studies; <sup>19,20,22,25,28,29,32,33,45,47,49</sup>). Thirteen studies examined characteristics of LTCF and their  
173 association with COVID-19 infection and risk <sup>16,24,31,35-37,39-43,51,52</sup>.

For peer review only

Table 1. Characteristics of studies including infection control measures

| Study ID                                   | Country                      | Study Design           | Setting                  | Population                                                                                                                                  | Intervention/infection control strategy                                                                                                                                                   | Outcome groups   | Outcome measures                                                                            |
|--------------------------------------------|------------------------------|------------------------|--------------------------|---------------------------------------------------------------------------------------------------------------------------------------------|-------------------------------------------------------------------------------------------------------------------------------------------------------------------------------------------|------------------|---------------------------------------------------------------------------------------------|
| Abrams et al. (2020) <sup>16</sup>         | USA                          | Cross sectional        | Nursing homes            | Nursing homes across 30 USA States (n=9395 nursing homes). N=6446 facilities without COVID-19 cases; n=2949 facilities with COVID-19 cases. | Nursing homes characteristics associated with COVID-19 outbreaks                                                                                                                          | Facilities       | Estimates on the relationship of nursing home characteristics and documented COVID-19 cases |
| Arons et al. (2020) <sup>17</sup>          | USA, King County, Washington | Cross sectional cohort | Nursing home facility    | Residents N=89<br>N=76 participated in point-prevalence testing.                                                                            | PPE (eye protection, gown, gloves, face masks); mass testing.                                                                                                                             | Residents, staff | COVID-19 prevalence, testing, symptoms, hospitalization, mortality                          |
| Blackman et al. (2020) <sup>18</sup>       | USA                          | Cross sectional        | Skilled nursing facility | A 150-bedded skilled nursing facility. Single story building with four units.                                                               | Employee and visitor screening on entry; visitor restrictions; review of PPE and infection control in the building; use of heat maps in a facility to track staff and residents' symptoms | Residents, staff | COVID-19 prevalence, testing, mortality                                                     |
| Borras-Bermejo et al. (2020) <sup>53</sup> | Spain                        | Cross sectional cohort | Nursing homes            | N=69 nursing homes in Barcelona.<br>N=3214 residents and<br>N=2655 staff                                                                    | Surveillance testing program for COVID-19 in nursing homes; introduction of restrictions for visitors                                                                                     | Residents, staff | COVID-19 prevalence, testing, symptoms                                                      |

|    |                                         |                                              |                        |                                                        |                                                                                                                                                       |                                                                                                                                                                                                               |                                  |                                                                                                 |
|----|-----------------------------------------|----------------------------------------------|------------------------|--------------------------------------------------------|-------------------------------------------------------------------------------------------------------------------------------------------------------|---------------------------------------------------------------------------------------------------------------------------------------------------------------------------------------------------------------|----------------------------------|-------------------------------------------------------------------------------------------------|
| 1  |                                         |                                              |                        |                                                        |                                                                                                                                                       |                                                                                                                                                                                                               |                                  |                                                                                                 |
| 2  |                                         |                                              |                        |                                                        |                                                                                                                                                       |                                                                                                                                                                                                               |                                  |                                                                                                 |
| 3  | Brainard et al. (2020) <sup>36</sup>    | England, Norfolk                             | Retrospective cohort   | Care homes                                             | N=248 care homes                                                                                                                                      | Statistical modelling assessing detection of COVID-19 infection relative to PPE availability and impact of staffing by non-care workers                                                                       | Facilities                       | Descriptive data and statistical modelling for COVID-19, staffing levels, access to PPE         |
| 4  |                                         |                                              |                        |                                                        |                                                                                                                                                       |                                                                                                                                                                                                               |                                  |                                                                                                 |
| 5  |                                         |                                              |                        |                                                        |                                                                                                                                                       |                                                                                                                                                                                                               |                                  |                                                                                                 |
| 6  |                                         |                                              |                        |                                                        |                                                                                                                                                       |                                                                                                                                                                                                               |                                  |                                                                                                 |
| 7  |                                         |                                              |                        |                                                        |                                                                                                                                                       |                                                                                                                                                                                                               |                                  |                                                                                                 |
| 8  |                                         |                                              |                        |                                                        |                                                                                                                                                       |                                                                                                                                                                                                               |                                  |                                                                                                 |
| 9  |                                         |                                              |                        |                                                        |                                                                                                                                                       |                                                                                                                                                                                                               |                                  |                                                                                                 |
| 10 | Brown et al. (2020) <sup>41</sup>       | Canada, Ontario                              | Retrospective cohort   | Nursing homes                                          | N=623 nursing homes. N=78,607 residents                                                                                                               | Impact of home crowding on COVID-19 infection and mortality using nursing home crowding index score                                                                                                           | Residents, facilities            | COVID-19 incidence, modelling mortality and overcrowding adjusting for facility characteristics |
| 11 |                                         |                                              |                        |                                                        |                                                                                                                                                       |                                                                                                                                                                                                               |                                  |                                                                                                 |
| 12 |                                         |                                              |                        |                                                        |                                                                                                                                                       |                                                                                                                                                                                                               |                                  |                                                                                                 |
| 13 |                                         |                                              |                        |                                                        |                                                                                                                                                       |                                                                                                                                                                                                               |                                  |                                                                                                 |
| 14 |                                         |                                              |                        |                                                        |                                                                                                                                                       |                                                                                                                                                                                                               |                                  |                                                                                                 |
| 15 | Burton et al. (2020) <sup>39</sup>      | Scotland                                     | Cross sectional cohort | Nursing homes                                          | N=189 nursing homes included and data for 109 homes (57.7%) for older people reported, representing 5227 beds (89.5% of total beds in 189 care homes) | Surveillance data to understand the evolution of COVID-19 following outbreaks and care home characteristics in one health board                                                                               | Facilities, residents            | COVID-19 outbreaks, mortality, and facility characteristics                                     |
| 16 |                                         |                                              |                        |                                                        |                                                                                                                                                       |                                                                                                                                                                                                               |                                  |                                                                                                 |
| 17 |                                         |                                              |                        |                                                        |                                                                                                                                                       |                                                                                                                                                                                                               |                                  |                                                                                                 |
| 18 |                                         |                                              |                        |                                                        |                                                                                                                                                       |                                                                                                                                                                                                               |                                  |                                                                                                 |
| 19 |                                         |                                              |                        |                                                        |                                                                                                                                                       |                                                                                                                                                                                                               |                                  |                                                                                                 |
| 20 |                                         |                                              |                        |                                                        |                                                                                                                                                       |                                                                                                                                                                                                               |                                  |                                                                                                 |
| 21 |                                         |                                              |                        |                                                        |                                                                                                                                                       |                                                                                                                                                                                                               |                                  |                                                                                                 |
| 22 |                                         |                                              |                        |                                                        |                                                                                                                                                       |                                                                                                                                                                                                               |                                  |                                                                                                 |
| 23 | Dora et al. (2020) <sup>19</sup>        | USA, California                              | Cross sectional        | Veterans Affairs Greater Los Angeles Healthcare System | N=3 skilled nursing facilities (n=150 long term beds) N=99 residents (95% male, age range 50 to 100 years) N=136 staff Visitors                       | Three point-prevalence surveys; visitor restrictions (initially all visitors screened, then no visitors permitted into buildings); staff screening; hand hygiene, droplet, and contact precautions; cohorting | Residents, staff                 | COVID-19 prevalence, symptoms, mortality                                                        |
| 24 |                                         |                                              |                        |                                                        |                                                                                                                                                       |                                                                                                                                                                                                               |                                  |                                                                                                 |
| 25 |                                         |                                              |                        |                                                        |                                                                                                                                                       |                                                                                                                                                                                                               |                                  |                                                                                                 |
| 26 |                                         |                                              |                        |                                                        |                                                                                                                                                       |                                                                                                                                                                                                               |                                  |                                                                                                 |
| 27 |                                         |                                              |                        |                                                        |                                                                                                                                                       |                                                                                                                                                                                                               |                                  |                                                                                                 |
| 28 |                                         |                                              |                        |                                                        |                                                                                                                                                       |                                                                                                                                                                                                               |                                  |                                                                                                 |
| 29 |                                         |                                              |                        |                                                        |                                                                                                                                                       |                                                                                                                                                                                                               |                                  |                                                                                                 |
| 30 |                                         |                                              |                        |                                                        |                                                                                                                                                       |                                                                                                                                                                                                               |                                  |                                                                                                 |
| 31 |                                         |                                              |                        |                                                        |                                                                                                                                                       |                                                                                                                                                                                                               |                                  |                                                                                                 |
| 32 |                                         |                                              |                        |                                                        |                                                                                                                                                       |                                                                                                                                                                                                               |                                  |                                                                                                 |
| 33 |                                         |                                              |                        |                                                        |                                                                                                                                                       |                                                                                                                                                                                                               |                                  |                                                                                                 |
| 34 | Dutey-Magni et al. (2020) <sup>38</sup> | UK (England, Scotland, and Northern Ireland) | Cohort                 | Long term care facilities                              | N=8713 resident's health records Daily counts of infection in 9339 residents and for 11604 staff across 179 LTCF.                                     | The home testing program introduced for all staff and residents in Four Seasons Healthcare Group (representing 9% of all                                                                                      | Residents, staff, and facilities | Cumulative incidence of COVID-19, Kaplan-Meier estimates mortality and symptoms.                |
| 35 |                                         |                                              |                        |                                                        |                                                                                                                                                       |                                                                                                                                                                                                               |                                  |                                                                                                 |
| 36 |                                         |                                              |                        |                                                        |                                                                                                                                                       |                                                                                                                                                                                                               |                                  |                                                                                                 |
| 37 |                                         |                                              |                        |                                                        |                                                                                                                                                       |                                                                                                                                                                                                               |                                  |                                                                                                 |
| 38 |                                         |                                              |                        |                                                        |                                                                                                                                                       |                                                                                                                                                                                                               |                                  |                                                                                                 |
| 39 |                                         |                                              |                        |                                                        |                                                                                                                                                       |                                                                                                                                                                                                               |                                  |                                                                                                 |
| 40 |                                         |                                              |                        |                                                        |                                                                                                                                                       |                                                                                                                                                                                                               |                                  |                                                                                                 |
| 41 |                                         |                                              |                        |                                                        |                                                                                                                                                       |                                                                                                                                                                                                               |                                  |                                                                                                 |
| 42 |                                         |                                              |                        |                                                        |                                                                                                                                                       |                                                                                                                                                                                                               |                                  |                                                                                                 |
| 43 |                                         |                                              |                        |                                                        |                                                                                                                                                       |                                                                                                                                                                                                               |                                  |                                                                                                 |
| 44 |                                         |                                              |                        |                                                        |                                                                                                                                                       |                                                                                                                                                                                                               |                                  |                                                                                                 |
| 45 |                                         |                                              |                        |                                                        |                                                                                                                                                       |                                                                                                                                                                                                               |                                  |                                                                                                 |
| 46 |                                         |                                              |                        |                                                        |                                                                                                                                                       |                                                                                                                                                                                                               |                                  |                                                                                                 |

|                                    |                 |                        |                           |                                                                                                                                                                                                                                                                                                                                                              |                                                                                                                                         |                              |                                                                                                                                                                                   |
|------------------------------------|-----------------|------------------------|---------------------------|--------------------------------------------------------------------------------------------------------------------------------------------------------------------------------------------------------------------------------------------------------------------------------------------------------------------------------------------------------------|-----------------------------------------------------------------------------------------------------------------------------------------|------------------------------|-----------------------------------------------------------------------------------------------------------------------------------------------------------------------------------|
|                                    |                 |                        |                           |                                                                                                                                                                                                                                                                                                                                                              | long-term care beds). All tested at least once.                                                                                         |                              |                                                                                                                                                                                   |
| Eckardt et al (2020) <sup>20</sup> | USA, Florida    | Cross sectional cohort | Long term care            | 120-bedded long-term care facility.                                                                                                                                                                                                                                                                                                                          | PPE; staff and visitor screening; visitor restrictions; distancing of residents; cohorting exposed residents; point-prevalence testing. | Residents, staff             | COVID-19 prevalence                                                                                                                                                               |
| Feaster & Goh (2020) <sup>21</sup> | USA, Pasadena   | Cross sectional cohort | Long term care homes      | Residents and staff (n=1093) of LTCF (n=9) N=608 residents (age 78 ± 13.3 years; n=332 female) N=485 staff (age 41.8 ± 13.3 years; n=249 female)                                                                                                                                                                                                             | Mass surveillance testing                                                                                                               | Residents, staff             | COVID-19 prevalence, symptoms                                                                                                                                                     |
| Fisman et al. (2020) <sup>42</sup> | Canada, Ontario | Cohort                 | Long term care facilities | N=269 total individuals who died of COVID-19 in Ontario to April 11, 2020, and n=83 individuals who died of COVID-19 in Ontario LTCF to April 7, 2020. Denominators not available for long-term care residents approximated as the total number of long-term care facility beds in Ontario (79 498), assuming complete occupancy. Median beds 120 [9 to 543] | Surveillance data analysed to evaluate the risk of death and identification of risk factors for prevention strategies                   | Residents, staff, facilities | COVID-19-specific mortality incidence rate ratios (IRRs) of long term care residents were calculated with community-living Ontarians older than 69 years as the comparator group. |

1  
2  
3  
4  
5  
6  
7  
8  
9  
10  
11  
12  
13  
14  
15  
16  
17  
18  
19  
20  
21  
22  
23  
24  
25  
26  
27  
28  
29  
30  
31  
32  
33  
34  
35  
36  
37  
38  
39  
40  
41  
42  
43  
44  
45  
46

|                                    |                |                        |                                       |                                                                                                          |                                                                                                                                                                                                                                                                                                                                                        |                       |                                                                                                                                       |
|------------------------------------|----------------|------------------------|---------------------------------------|----------------------------------------------------------------------------------------------------------|--------------------------------------------------------------------------------------------------------------------------------------------------------------------------------------------------------------------------------------------------------------------------------------------------------------------------------------------------------|-----------------------|---------------------------------------------------------------------------------------------------------------------------------------|
| Graham et al. (2020) <sup>22</sup> | England        | Cross sectional cohort | Four nursing homes in London, England | N=4 nursing homes. N=394 residents (37.6% male, median age 83 years [IQR 15], 75.4% white) N=596 staff.  | Mass surveillance testing; isolation of infected residents                                                                                                                                                                                                                                                                                             | Residents, staff      | COVID-19 prevalence, symptoms, mortality. Multivariable logistic regression of presenting symptoms in those who had an available test |
| Guery et al (2020) <sup>44</sup>   | France, Nantes | Cross sectional cohort | Nursing home                          | N=136 staff (age 39 years [IQR 27-48.5], n=112 female)                                                   | Surveillance testing of staff following confirmed index case                                                                                                                                                                                                                                                                                           | Staff                 | COVID-19 prevalence, symptoms                                                                                                         |
| Hand et al. (2018) <sup>23</sup>   | USA, Louisiana | Cross sectional cohort | Long term care facility               | Long term care facility provides services for up to 130 residents: report on 20 resident cases           | Outbreak surveillance after 20 cases reported. Adherence to standard droplet precautions for symptomatic residents                                                                                                                                                                                                                                     | Residents, facilities | Prevalence of Coronavirus NL63 symptoms, hospitalizations, mortality                                                                  |
| Harris et al. (2020) <sup>24</sup> | USA, Virginia  | Cross sectional cohort | Long term care facility               | N=41 of 48 residents (median age 75 years [44-104], 52.1% female (25/48). 60.4% White (29/48)) N=7 staff | Following an outbreak, response developed for the management of residents and the use of telemedicine. Early identification of residents for escalation of care; monitoring and treating patients safe to remain in a facility; care coordination - bidirectional; daily needs assessment related to technology, infection control and staff wellbeing | Residents, staff      | COVID-19 prevalence, mortalities, comorbidities, telemedicine consultations                                                           |

|                                                                                                 |                                     |           |                        |                                                                                          |                                                                                                                                                                                                                                                                                                                       |                                                                                                                                                                             |                                        |                                                                                                     |
|-------------------------------------------------------------------------------------------------|-------------------------------------|-----------|------------------------|------------------------------------------------------------------------------------------|-----------------------------------------------------------------------------------------------------------------------------------------------------------------------------------------------------------------------------------------------------------------------------------------------------------------------|-----------------------------------------------------------------------------------------------------------------------------------------------------------------------------|----------------------------------------|-----------------------------------------------------------------------------------------------------|
| 1<br>2<br>3<br>4<br>5<br>6<br>7<br>8<br>9<br>10<br>11<br>12<br>13<br>14<br>15<br>16<br>17<br>18 | Heung et al (2006) <sup>46</sup>    | Hong Kong | Cross sectional cohort | Residential care home                                                                    | N=90 residents<br>N=32 staff<br>N=67/90 residents participated; n=7 (10%) aged 65 -75 years, n=32 (48%) 76-85 years, n=28 (42%) >85 years; n=53 (79%) females.<br>Staff 26/32 participated; n=18 (69%) aged 31-50 years, n=8 (31%) >50 years; 85% females; 54% nursing care role, 46% assistance in daily activities. | Surveillance screening in a residential care home with the introduction of infection control precautions: droplet and contact precautions                                   | Resident, staff, facilities            | Seroprevalence of SARS-CoV antibodies. Symptoms, transmission, and mortality                        |
| 19<br>20<br>21<br>22<br>23<br>24<br>25<br>26                                                    | Ho et al. (2004) <sup>47</sup>      | Hong Kong | Cross sectional cohort | Nursing home                                                                             | N=7 residents, staff, visitors in one nursing home (n=4 females aged in their 60s to 90s; n=3 males aged in their 20s to 80s)                                                                                                                                                                                         | Proposed intervention for future management. Community-based outreach teams led by geriatricians, nurses to closely monitor nursing home residents discharged from hospital | Residents, staff, visitors, facilities | Descriptive data on seven cases, the onset of illness, transmission and outcome including mortality |
| 27<br>28<br>29<br>30<br>31<br>32                                                                | Hoxha et al. (2020) <sup>48</sup>   | Belgium   | Cross sectional cohort | Long Term Care Facilities                                                                | Reporting for 2074 of 2500 invited facilities; 280,427 COVID-19 tests. 51% residents (N=142,100) and 49% staff (N=138,327)                                                                                                                                                                                            | Mass testing                                                                                                                                                                | Residents and staff                    | COVID-19 prevalence, symptoms, characteristics associated with positive test outcome                |
| 33<br>34<br>35<br>36<br>37<br>38<br>39<br>40                                                    | Iritani et al. (2020) <sup>51</sup> | Japan     | Cross sectional cohort | Across long term care hospitals/facilities, general medical/welfare facilities, and non- | 381 clusters with 3786 infected cases accounting for 23.9% of 15,852 cases                                                                                                                                                                                                                                            | Following government recommendation suspension or restricting temporary use of LTCF in areas where infection prevalent                                                      | Facilities                             | Descriptive data on clusters reported, mortality data                                               |



|    |                                      |                              | medical/welfare facilities |                                         |                                                                                                                                       |                                                                                                                                                     |                              |                                                                                                                                    |
|----|--------------------------------------|------------------------------|----------------------------|-----------------------------------------|---------------------------------------------------------------------------------------------------------------------------------------|-----------------------------------------------------------------------------------------------------------------------------------------------------|------------------------------|------------------------------------------------------------------------------------------------------------------------------------|
| 1  |                                      |                              |                            |                                         |                                                                                                                                       |                                                                                                                                                     |                              |                                                                                                                                    |
| 2  |                                      |                              |                            |                                         |                                                                                                                                       |                                                                                                                                                     |                              |                                                                                                                                    |
| 3  |                                      |                              |                            |                                         |                                                                                                                                       |                                                                                                                                                     |                              |                                                                                                                                    |
| 4  |                                      |                              |                            |                                         |                                                                                                                                       |                                                                                                                                                     |                              |                                                                                                                                    |
| 5  |                                      |                              |                            |                                         |                                                                                                                                       |                                                                                                                                                     |                              |                                                                                                                                    |
| 6  |                                      |                              |                            |                                         |                                                                                                                                       |                                                                                                                                                     |                              |                                                                                                                                    |
| 7  |                                      |                              |                            |                                         |                                                                                                                                       |                                                                                                                                                     |                              |                                                                                                                                    |
| 8  |                                      |                              |                            |                                         |                                                                                                                                       |                                                                                                                                                     |                              |                                                                                                                                    |
| 9  |                                      |                              |                            |                                         |                                                                                                                                       |                                                                                                                                                     |                              |                                                                                                                                    |
| 10 | Kennelly et al. (2020) <sup>50</sup> | Ireland                      | Cross sectional cohort     | Nursing homes                           | Nursing home residents in three community health organizations in Ireland (N=28 nursing homes). Represents 2043 residents & 2303 beds | Mass surveillance testing; post testing program                                                                                                     | Staff, residents, facilities | COVID-19 prevalence, symptoms, clinical outcomes, including mortality. Characteristics of facilities associated with transmission. |
| 11 |                                      |                              |                            |                                         |                                                                                                                                       |                                                                                                                                                     |                              |                                                                                                                                    |
| 12 |                                      |                              |                            |                                         |                                                                                                                                       |                                                                                                                                                     |                              |                                                                                                                                    |
| 13 |                                      |                              |                            |                                         |                                                                                                                                       |                                                                                                                                                     |                              |                                                                                                                                    |
| 14 |                                      |                              |                            |                                         |                                                                                                                                       |                                                                                                                                                     |                              |                                                                                                                                    |
| 15 |                                      |                              |                            |                                         |                                                                                                                                       |                                                                                                                                                     |                              |                                                                                                                                    |
| 16 |                                      |                              |                            |                                         |                                                                                                                                       |                                                                                                                                                     |                              |                                                                                                                                    |
| 17 |                                      |                              |                            |                                         |                                                                                                                                       |                                                                                                                                                     |                              |                                                                                                                                    |
| 18 | Kim (2020) <sup>52</sup>             | Korea (South)                | Cross sectional cohort     | Nursing home                            | N=142 nursing home residents<br>N=85 health care workers and caregivers working in one facility                                       | Procedures identified to reduce transmission of COVID-19 following confirmed case in a staff member                                                 | Facilities                   | Data on the preparedness of the facility to reduce transmission.                                                                   |
| 19 |                                      |                              |                            |                                         |                                                                                                                                       |                                                                                                                                                     |                              |                                                                                                                                    |
| 20 |                                      |                              |                            |                                         |                                                                                                                                       |                                                                                                                                                     |                              |                                                                                                                                    |
| 21 |                                      |                              |                            |                                         |                                                                                                                                       |                                                                                                                                                     |                              |                                                                                                                                    |
| 22 |                                      |                              |                            |                                         |                                                                                                                                       |                                                                                                                                                     |                              |                                                                                                                                    |
| 23 |                                      |                              |                            |                                         |                                                                                                                                       |                                                                                                                                                     |                              |                                                                                                                                    |
| 24 |                                      |                              |                            |                                         |                                                                                                                                       |                                                                                                                                                     |                              |                                                                                                                                    |
| 25 | Kimball et al. (2020) <sup>25</sup>  | USA, King County, Washington | Cross sectional cohort     | Long-Term Care Skilled Nursing Facility | Nursing home. N=82 residents; 76/82 (92.7%) underwent symptom assessment and testing; three (3.7%) refused testing                    | Surveillance testing; PPE; hand hygiene; visitor restrictions; staff screening; daily resident symptom assessments; isolation of positive residents | Residents                    | COVID-19 prevalence and symptoms                                                                                                   |
| 26 |                                      |                              |                            |                                         |                                                                                                                                       |                                                                                                                                                     |                              |                                                                                                                                    |
| 27 |                                      |                              |                            |                                         |                                                                                                                                       |                                                                                                                                                     |                              |                                                                                                                                    |
| 28 |                                      |                              |                            |                                         |                                                                                                                                       |                                                                                                                                                     |                              |                                                                                                                                    |
| 29 |                                      |                              |                            |                                         |                                                                                                                                       |                                                                                                                                                     |                              |                                                                                                                                    |
| 30 |                                      |                              |                            |                                         |                                                                                                                                       |                                                                                                                                                     |                              |                                                                                                                                    |
| 31 |                                      |                              |                            |                                         |                                                                                                                                       |                                                                                                                                                     |                              |                                                                                                                                    |
| 32 | Klein et al (2020) <sup>51</sup>     | Germany, Hamburg             | Cross sectional            | Residential care facility               | N=60 resident and report from eight deceased residents.                                                                               | Mass testing; PPE; resident cohorting; visitor restrictions                                                                                         | Residents                    | COVID-19 prevalence and symptoms, management                                                                                       |
| 33 |                                      |                              |                            |                                         |                                                                                                                                       |                                                                                                                                                     |                              |                                                                                                                                    |
| 34 |                                      |                              |                            |                                         |                                                                                                                                       |                                                                                                                                                     |                              |                                                                                                                                    |
| 35 |                                      |                              |                            |                                         |                                                                                                                                       |                                                                                                                                                     |                              |                                                                                                                                    |
| 36 |                                      |                              |                            |                                         |                                                                                                                                       |                                                                                                                                                     |                              |                                                                                                                                    |
| 37 |                                      |                              |                            |                                         |                                                                                                                                       |                                                                                                                                                     |                              |                                                                                                                                    |
| 38 |                                      |                              |                            |                                         |                                                                                                                                       |                                                                                                                                                     |                              |                                                                                                                                    |
| 39 |                                      |                              |                            |                                         |                                                                                                                                       |                                                                                                                                                     |                              |                                                                                                                                    |
| 40 |                                      |                              |                            |                                         |                                                                                                                                       |                                                                                                                                                     |                              |                                                                                                                                    |
| 41 |                                      |                              |                            |                                         |                                                                                                                                       |                                                                                                                                                     |                              |                                                                                                                                    |
| 42 |                                      |                              |                            |                                         |                                                                                                                                       |                                                                                                                                                     |                              |                                                                                                                                    |
| 43 |                                      |                              |                            |                                         |                                                                                                                                       |                                                                                                                                                     |                              |                                                                                                                                    |
| 44 |                                      |                              |                            |                                         |                                                                                                                                       |                                                                                                                                                     |                              |                                                                                                                                    |
| 45 |                                      |                              |                            |                                         |                                                                                                                                       |                                                                                                                                                     |                              |                                                                                                                                    |
| 46 |                                      |                              |                            |                                         |                                                                                                                                       |                                                                                                                                                     |                              |                                                                                                                                    |

|                                         |                              |                        |                                                                   |                                                                                                                                                                                                                                                                               |                                                                                                                                                                                     |                                        |                                                                        |
|-----------------------------------------|------------------------------|------------------------|-------------------------------------------------------------------|-------------------------------------------------------------------------------------------------------------------------------------------------------------------------------------------------------------------------------------------------------------------------------|-------------------------------------------------------------------------------------------------------------------------------------------------------------------------------------|----------------------------------------|------------------------------------------------------------------------|
| Lennon et al. (2020) <sup>26</sup>      | USA, Massachusetts           | Cross sectional cohort | Skilled facilities, nursing homes and assisted living facilities  | N=366 skilled nursing facilities<br>N=32,480 residents and staff tested once, and 6.7% tested subsequently.<br>N=16,966 residents (mean age 82 ± 13; 65% female).<br>N=15,514 staff (mean age 45 ± 15; 76% female).                                                           | Mass testing and recording of symptoms, comparison of viral levels                                                                                                                  | Residents, staff                       | COVID-19 prevalence, symptoms                                          |
| Louie et al. (2020) <sup>27</sup>       | USA, San Francisco           | Cohort                 | Three skilled nursing facilities and one assisted living facility | N=431 residents and staff tested as part of initial surveillance.<br>Follow up testing of n=303 asymptomatic cases.                                                                                                                                                           | Mass surveillance testing; restrictions on visitors & non-essential staff; increased monitoring/screening of people entering/residing in a facility                                 | Residents, staff                       | COVID-19 prevalence, hospitalizations, fatalities, management          |
| McMichael et al. (2020) a <sup>28</sup> | USA, King County, Washington | Cross sectional cohort | Skilled Nursing Facility                                          | N=167<br>N=101 residents (median aged 83 (51-100), n=32 (31.7%) male, n=69 (68.3%) female).<br>N=50 health care personnel (median age 43.5 (21-79), n=12 (24%) males, n=38 (76%) female).<br>N=16 visitors (median age 72.5 (52-88), n=11 (68.7%) male, n=5 (31.2%) females). | Mass surveillance testing; contact tracing; quarantine of exposed persons; isolation of confirmed and suspected cases; on-site enhancement of PPE/infection prevention and control. | Residents, staff, visitors, facilities | COVID-19 prevalence, symptoms, mortality, hospitalizations, management |

|                                                     |                |                        |                                                                             |                                                                                                                                                                      |                                                                                                               |                              |                                                                                     |
|-----------------------------------------------------|----------------|------------------------|-----------------------------------------------------------------------------|----------------------------------------------------------------------------------------------------------------------------------------------------------------------|---------------------------------------------------------------------------------------------------------------|------------------------------|-------------------------------------------------------------------------------------|
| Office for National Statistics (2020) <sup>39</sup> | England        | Cross sectional cohort | Care homes providing care for older residents and those with dementia only. | N=9081 care homes for people aged 65 years and older - representing 292,301 residents (95% CI 293,168 to 293,434) and 441,498 staff. N=5126 homes participated (56%) | Prevalence of COVID-19 in residents and staff. Factors associated with higher levels of infection.            | Residents, staff, facilities | COVID-19 prevalence in residents aged 65 years and older and employees.             |
| Patel et al. (2020) <sup>29</sup>                   | USA, Illinois  | Cross sectional cohort | Nursing home (150 bedded unit)                                              | N=127 residents. 9% (n=11) single occupancy rooms, 91% (n=116) double occupancy rooms. N=454 staff                                                                   | Mass surveillance testing; screening of staff and visitors; visitor restrictions; cohorting of residents; PPE | Residents, staff, facilities | COVID-19 prevalence, symptoms, hospitalizations and survival rates, management      |
| Quicke et al. (2020) <sup>30</sup>                  | USA, Colorado  | Longitudinal cohort    | Five skilled nursing facilities                                             |                                                                                                                                                                      | Weekly surveillance nasopharyngeal swabs tests were collected.                                                | Staff                        | COVID-19 prevalence and incidence, symptoms and information on genomic epidemiology |
| Quigley et al (2020) <sup>31</sup>                  | USA, 29 States | Cross sectional cohort | Nursing homes                                                               | N=56 nursing homes from 29 States: Midwest (30%), West (25%), Northeast (23%), South (22%).                                                                          | Reported on preparedness for COVID-19, testing, supplies and staffing levels                                  | Facilities                   | Preparedness of nursing home facilities during COVID-19                             |

|                                    |                          |                        |                                        |                                                                                                                                                                                                                                                                     |                                                                                                                        |                              |                                                                                                                              |
|------------------------------------|--------------------------|------------------------|----------------------------------------|---------------------------------------------------------------------------------------------------------------------------------------------------------------------------------------------------------------------------------------------------------------------|------------------------------------------------------------------------------------------------------------------------|------------------------------|------------------------------------------------------------------------------------------------------------------------------|
| Roxby et al. (2020) <sup>32</sup>  | USA, Seattle, Washington | Cross sectional cohort | Assisted living community older adults | Older aged residents and staff in an assisted living community.<br>N=80 residents (mean age 86 years (range, 69-102); n=62 (77%) female).<br>N=62 staff (mean age 40.0 ± 15; n=42 (68%) female).<br>N=83 private apartments, n=45 independent, n=38 assisted living | Mass testing; resident cohorting/isolation; PPE; staff screening; visitor screening; additional hand hygiene stations. | Residents, staff             | COVID-19 prevalence and symptoms                                                                                             |
| Sacco et al (2020) <sup>45</sup>   | France, Maine-et-Loire   | Cross sectional cohort | Nursing home                           | N=87 residents (age 87.9 ± 7.2; 71% female)<br>N=92 staff (age 38.3 ± 11.7; 89% female)                                                                                                                                                                             | Mass testing; PPE; visitor restrictions; hand hygiene; resident isolation                                              | Residents, staff, facilities | COVID-19 prevalence and case-fatality rates. Resident's clinical signs and symptoms obtained from retrospective chart audit. |
| Sanchez et al (2020) <sup>33</sup> | USA, Detroit             | Time series cohort     | Skilled Nursing Facilities             | N=26 skilled nursing facilities<br>N=2773 residents' tests reported at baseline (median age 72 years [IQR 64-82 years]); n=2218 1st follow up; n=637 2nd follow up                                                                                                  | Two point-prevalence surveys; follow up in 12 facilities following PPE guidelines; resident cohorting                  | Residents, facilities        | COVID-19 prevalence, hospitalizations, and deaths pre and post introduction of testing                                       |

1  
2  
3  
4  
5  
6  
7  
8  
9  
10  
11  
12  
13  
14  
15  
16  
17  
18  
19  
20  
21  
22  
23  
24  
25  
26  
27  
28  
29  
30  
31  
32  
33  
34  
35  
36  
37  
38  
39  
40  
41  
42  
43  
44  
45  
46

|                            |                 |                               |                                                           |                                                                                                                                                                                                                                |                                                                                                                                                                                                   |                                  |                                                                                                                                                                                                                                                                                                                                                                                                                                                       |
|----------------------------|-----------------|-------------------------------|-----------------------------------------------------------|--------------------------------------------------------------------------------------------------------------------------------------------------------------------------------------------------------------------------------|---------------------------------------------------------------------------------------------------------------------------------------------------------------------------------------------------|----------------------------------|-------------------------------------------------------------------------------------------------------------------------------------------------------------------------------------------------------------------------------------------------------------------------------------------------------------------------------------------------------------------------------------------------------------------------------------------------------|
| Stall (2020) <sup>43</sup> | Canada, Ontario | Retrospective cohort          | Nursing homes                                             | N=623 nursing homes (n=75,676 residents); 360/623 (57.7%) for-profit homes, 162/623 (26.0%) non-profit, 101/623 (16.2%) municipal homes. Mean number residents: n=113.2 (for profit); n=119.6 (non-profit); n=101 (municipal). | Impact of profit status at the level of a home rather than a resident. Using data from the Ontario Ministries of Health and Long-Term Care as part of the province's emergency "modelling table." | Facilities, residents, and staff | Descriptive data on outbreaks, facility characteristics and mortality rates. Nursing home profit status (for-profit, non-profit or municipal), nursing home COVID-19 outbreaks (at least one resident case), COVID-19 outbreak sizes (total number of confirmed resident cases amongst homes with outbreaks), and the total number of COVID-19 resident deaths (amongst homes with outbreaks). Outbreaks in staff reported. Death rates for residents |
| Stow (2020) <sup>40</sup>  | England         | Longitudinal ecological study | Care home units from 46 local authority areas in England. | N=460 care home units<br>N=6,464 residents                                                                                                                                                                                     | Use of National Early Warning Score (NEWS) for identification of at-risk/surveillance to reduce mortality                                                                                         | Residents                        | Descriptive data NEWS surveillance on reducing mortality. Time-series comparison with Office for National Statistics weekly reported registered deaths of care home residents and COVID-19 was the underlying cause of death, and all other deaths (excluding COVID-19) up to 10/05/2020.                                                                                                                                                             |

|                                     |                                                          |                        |                                    |                                                                                          |                                                              |                  |                                                                                                                                   |
|-------------------------------------|----------------------------------------------------------|------------------------|------------------------------------|------------------------------------------------------------------------------------------|--------------------------------------------------------------|------------------|-----------------------------------------------------------------------------------------------------------------------------------|
| Telford et al. (2020) <sup>34</sup> | USA State of Georgia (Fulton County and City of Atlanta) | Cross sectional cohort | Nursing homes                      | N=28 nursing homes. N=5671 participants; n=2868 (50.6%) residents, n=2803 (49.4%) staff. | Mass surveillance testing of staff and residents             | Residents, staff | COVID-19 prevalence, hospitalizations, and deaths.                                                                                |
| Unruh et al. (2020) <sup>35</sup>   | USA States New Jersey, New York, Connecticut             | Case study             | Nursing homes with $\geq 100$ beds | N=1162 nursing home facilities                                                           | Nursing home characteristics associated with mortality rates | Facilities       | Mortality data. Predicted probabilities with Logistic Regression, Independent variables compared on characteristics of facilities |

Study setting is presented as defined in original study. PPE, personal protective equipment; LTCF, long term care facilities; IQR, inter quartile range; NEWS, national early warning score.

Table 2. COVID-19 outcomes related to the nature of long term care facilities.

| Study                              | Facilities | Outcomes                                                                                                                                                                                                                                                                                                                                                                                                                                                                                                                                                                                                                               |
|------------------------------------|------------|----------------------------------------------------------------------------------------------------------------------------------------------------------------------------------------------------------------------------------------------------------------------------------------------------------------------------------------------------------------------------------------------------------------------------------------------------------------------------------------------------------------------------------------------------------------------------------------------------------------------------------------|
| Abrams et al. (2020) <sup>16</sup> | Facilities | <p>Average number of cases was 19.8 (range 1 to 256). New Jersey (88.6%, OR 7.16) and Massachusetts (78.0%, OR 4.36) had a higher number of affected facilities.</p> <p>Probability of having a COVID-19 case:<br/>           Facility size (relative to small): Large OR=6.52; Medium OR=2.63<br/>           Location (relative to rural): Urban OR=3.22<br/>           % African American residents (relative to low %): Greater % OR=2.05<br/>           Nursing home chain status (relative to non-chain status): Chain status OR=0.89<br/>           State were significantly related to the probability of having COVID case</p> |

---

|    |                                  |            |                                                                                                                                                                                                                                                                                                                                                                                                                                                                                                                                                                                                           |
|----|----------------------------------|------------|-----------------------------------------------------------------------------------------------------------------------------------------------------------------------------------------------------------------------------------------------------------------------------------------------------------------------------------------------------------------------------------------------------------------------------------------------------------------------------------------------------------------------------------------------------------------------------------------------------------|
| 1  |                                  |            |                                                                                                                                                                                                                                                                                                                                                                                                                                                                                                                                                                                                           |
| 2  |                                  |            |                                                                                                                                                                                                                                                                                                                                                                                                                                                                                                                                                                                                           |
| 3  |                                  |            |                                                                                                                                                                                                                                                                                                                                                                                                                                                                                                                                                                                                           |
| 4  |                                  |            | Outbreak size associations:                                                                                                                                                                                                                                                                                                                                                                                                                                                                                                                                                                               |
| 5  |                                  |            | Facility size (relative to small facility size): Large= -15.88; medium= -10.8 (percentage point change)                                                                                                                                                                                                                                                                                                                                                                                                                                                                                                   |
| 6  |                                  |            | For-profit status (relative to non-profit status) =1.88                                                                                                                                                                                                                                                                                                                                                                                                                                                                                                                                                   |
| 7  |                                  |            | State.                                                                                                                                                                                                                                                                                                                                                                                                                                                                                                                                                                                                    |
| 8  |                                  |            |                                                                                                                                                                                                                                                                                                                                                                                                                                                                                                                                                                                                           |
| 9  |                                  |            | Medicaid dependency, ownership, five-star rating, and prior infection violation were not significantly related to COVID-19 cases.                                                                                                                                                                                                                                                                                                                                                                                                                                                                         |
| 10 | Brainard et al.                  | Facilities | Risk of infection:                                                                                                                                                                                                                                                                                                                                                                                                                                                                                                                                                                                        |
| 11 | (2020) <sup>36</sup>             |            | Facility employee numbers (relative to <10 workers): 11-20 non-care workers HR = 6.502 (95%CI 2.614 -16.17); 21-30 non-care workers HR = 9.870 (95% CI 3.224 -30.22); >30 non-care workers HR = 18.927 (95% CI 2.358 -151.90).                                                                                                                                                                                                                                                                                                                                                                            |
| 12 |                                  |            |                                                                                                                                                                                                                                                                                                                                                                                                                                                                                                                                                                                                           |
| 13 |                                  |            |                                                                                                                                                                                                                                                                                                                                                                                                                                                                                                                                                                                                           |
| 14 |                                  |            | Predictors of spread and increase in cases per unit after 5th April risk increased 1.0347 (95% CI 1.02-1.05) p < 0.001, reduced availability of PPE for eye protection increased risk 1.6571 (95% CI 1.29-2.13) p < 0.001, PPE for facemasks 1.2602 (95% CI 1.09-1.46) p = 0.002, count of care workers employed 1.0379 (95% CI 1.02-1.05) p < 0.001 count of nurses employed (in bands of 0-10,11-20, 21-30 and 31+) 1.1814 (95% CI 1.13-1.24) p < 0.001.                                                                                                                                                |
| 15 |                                  |            |                                                                                                                                                                                                                                                                                                                                                                                                                                                                                                                                                                                                           |
| 16 |                                  |            |                                                                                                                                                                                                                                                                                                                                                                                                                                                                                                                                                                                                           |
| 17 | Brown et al.                     | Facilities | Incidence in high crowding index homes was 9.7% versus 4.5% in low crowding index homes (p<0.001), while COVID-19 mortality was 2.7% versus 1.3%. Likelihood of COVID-19 introduction did not differ (31.3% vs 30.2%, p=0.79). After adjustment for a regional nursing home, and resident covariates, the crowding index remained associated with increased risk of infection (RR=1.72, 95% CI: 1.11-2.65) and mortality (RR=1.72, 95% CI: 1.03-2.86). Simulations suggested that converting all 4-bed rooms to 2-bed rooms would have averted 988 (18.9%) infections of COVID-19 and 271 (18.7%) deaths. |
| 18 | (2020) <sup>41</sup>             |            |                                                                                                                                                                                                                                                                                                                                                                                                                                                                                                                                                                                                           |
| 19 |                                  |            |                                                                                                                                                                                                                                                                                                                                                                                                                                                                                                                                                                                                           |
| 20 |                                  |            |                                                                                                                                                                                                                                                                                                                                                                                                                                                                                                                                                                                                           |
| 21 |                                  |            |                                                                                                                                                                                                                                                                                                                                                                                                                                                                                                                                                                                                           |
| 22 | Burton et al.                    | Facilities | Significant associations between the presence of an outbreak and number of beds (OR per 20-bed increase 3.50), a history of multiple previous outbreaks (OR 3.76), and regulatory risk assessment score (OR high-risk vs low 2.19). However, in the adjusted analysis, only number of beds (OR per 20-bed increase 3.50, 95%CI 2.06 to 5.94 per 20-bed increase).                                                                                                                                                                                                                                         |
| 23 | (2020) <sup>37</sup>             |            |                                                                                                                                                                                                                                                                                                                                                                                                                                                                                                                                                                                                           |
| 24 |                                  |            |                                                                                                                                                                                                                                                                                                                                                                                                                                                                                                                                                                                                           |
| 25 | Dutey-Magni et al.               | Facilities | COVID-19 outbreak recorded in 121 of 179 facilities (67.6%). Large LTCF had greater rates of infection (aHR=1.8 [95% CI: 1.4-2.4] for LTCF with ≥70 beds versus <35 beds. The adjusted hazard ratio for confirmed infection was 2.5 times [95% CI: 1.9-3.3] greater in LTCF with 0.85-1 resident per room versus LTCF with 0.7-0.85 resident per room. A ten-percentage point increase in the bed to staff ratio was associated with a 23% increase in infection (aHR=1.23 [95% CI: 1.17-1.31]).                                                                                                          |
| 26 | (2020) <sup>38</sup>             |            |                                                                                                                                                                                                                                                                                                                                                                                                                                                                                                                                                                                                           |
| 27 |                                  |            |                                                                                                                                                                                                                                                                                                                                                                                                                                                                                                                                                                                                           |
| 28 |                                  |            |                                                                                                                                                                                                                                                                                                                                                                                                                                                                                                                                                                                                           |
| 29 | Fisman et al.                    | Facilities | Covid-19 cases higher in for-profit operators 165/361 (45.7%) compared to charitable 18/57 (31.6%).                                                                                                                                                                                                                                                                                                                                                                                                                                                                                                       |
| 30 | (2020) <sup>42</sup>             |            |                                                                                                                                                                                                                                                                                                                                                                                                                                                                                                                                                                                                           |
| 31 | Hand et al. (2018) <sup>23</sup> | Facilities | Residents noted to share rooms, walk throughout the facility and spent time in shared areas (e.g., gym, dining rooms, and recreational rooms). Because all case-patients had visited the gym at the facility for recreation or physical therapy before becoming ill, environmental cleaning of this area was performed.                                                                                                                                                                                                                                                                                   |
| 32 |                                  |            |                                                                                                                                                                                                                                                                                                                                                                                                                                                                                                                                                                                                           |
| 33 |                                  |            |                                                                                                                                                                                                                                                                                                                                                                                                                                                                                                                                                                                                           |

---

|    |                                                     |            |                                                                                                                                                                                                                                                                                                                                                                                                                                                                                                                                                                                                                                                                                                                                                                                                                                                                                                                                                                                                                               |
|----|-----------------------------------------------------|------------|-------------------------------------------------------------------------------------------------------------------------------------------------------------------------------------------------------------------------------------------------------------------------------------------------------------------------------------------------------------------------------------------------------------------------------------------------------------------------------------------------------------------------------------------------------------------------------------------------------------------------------------------------------------------------------------------------------------------------------------------------------------------------------------------------------------------------------------------------------------------------------------------------------------------------------------------------------------------------------------------------------------------------------|
| 1  |                                                     |            |                                                                                                                                                                                                                                                                                                                                                                                                                                                                                                                                                                                                                                                                                                                                                                                                                                                                                                                                                                                                                               |
| 2  |                                                     |            |                                                                                                                                                                                                                                                                                                                                                                                                                                                                                                                                                                                                                                                                                                                                                                                                                                                                                                                                                                                                                               |
| 3  | Heung et al. (2006) <sup>46</sup>                   | Facilities | 67 of 90 residents participated. 26 of 32 staff participated. 2 residents and one staff member were positive during the outbreak. None of the remaining participants was positive for SARS-CoV antibodies. Residents were aged 65+ years, 79% were female, 93% were ambulant, 90% did activities with others, 79% went out.<br>Review of residents who died: Resident A transferred from the hospital and was chair bound and dependent with care needs. Resident B was chair bound and had not left home or had visitors. She was brought to a shared sitting room during mealtimes. This was only time residents A and B were located near each other. One resident shared a room with patient B and tested positive. Staff C was a domestic worker, and contact was via clinical waste in resident A room.<br>Low seroprevalence attributed to precautionary measures taken in the facility to reduce droplet and prevent contact transmission. Risks noted of SARS via fomites possible.                                  |
| 4  |                                                     |            |                                                                                                                                                                                                                                                                                                                                                                                                                                                                                                                                                                                                                                                                                                                                                                                                                                                                                                                                                                                                                               |
| 5  |                                                     |            |                                                                                                                                                                                                                                                                                                                                                                                                                                                                                                                                                                                                                                                                                                                                                                                                                                                                                                                                                                                                                               |
| 6  |                                                     |            |                                                                                                                                                                                                                                                                                                                                                                                                                                                                                                                                                                                                                                                                                                                                                                                                                                                                                                                                                                                                                               |
| 7  |                                                     |            |                                                                                                                                                                                                                                                                                                                                                                                                                                                                                                                                                                                                                                                                                                                                                                                                                                                                                                                                                                                                                               |
| 8  |                                                     |            |                                                                                                                                                                                                                                                                                                                                                                                                                                                                                                                                                                                                                                                                                                                                                                                                                                                                                                                                                                                                                               |
| 9  |                                                     |            |                                                                                                                                                                                                                                                                                                                                                                                                                                                                                                                                                                                                                                                                                                                                                                                                                                                                                                                                                                                                                               |
| 10 |                                                     |            |                                                                                                                                                                                                                                                                                                                                                                                                                                                                                                                                                                                                                                                                                                                                                                                                                                                                                                                                                                                                                               |
| 11 |                                                     |            |                                                                                                                                                                                                                                                                                                                                                                                                                                                                                                                                                                                                                                                                                                                                                                                                                                                                                                                                                                                                                               |
| 12 | Ho et al. (2004) <sup>47</sup>                      | Facilities | 3 residents positive for SARS. 1 employee positive for SARS. 3 visitors positive for SARS. The index case was a single resident who was infected during a hospital stay, returned to the LTCF, and the virus spread to another 6 people. Transmission of the virus occurred due to lack of isolation rooms in nursing homes, lack of restricted movement of other patients and relatives, lack of infection control precautions, lack of knowledge among staff.                                                                                                                                                                                                                                                                                                                                                                                                                                                                                                                                                               |
| 13 |                                                     |            |                                                                                                                                                                                                                                                                                                                                                                                                                                                                                                                                                                                                                                                                                                                                                                                                                                                                                                                                                                                                                               |
| 14 |                                                     |            |                                                                                                                                                                                                                                                                                                                                                                                                                                                                                                                                                                                                                                                                                                                                                                                                                                                                                                                                                                                                                               |
| 15 |                                                     |            |                                                                                                                                                                                                                                                                                                                                                                                                                                                                                                                                                                                                                                                                                                                                                                                                                                                                                                                                                                                                                               |
| 16 | Iritani et al. (2020) <sup>51</sup>                 | Facilities | Larger cluster sizes in long term care hospitals/facilities were significantly positively associated with higher morbidity ( $\rho = 0.336$ , $P = 0.006$ ) and higher mortality ( $\rho = 0.317$ , $P = 0.009$ ).<br>Multivariate logistic regression showed larger cluster size (OR = 1.077, 95% CI: 1.017-1.145) and larger cluster number (OR = 2.019, 95% CI: 1.197-3.404) associated with mortality.                                                                                                                                                                                                                                                                                                                                                                                                                                                                                                                                                                                                                    |
| 17 |                                                     |            |                                                                                                                                                                                                                                                                                                                                                                                                                                                                                                                                                                                                                                                                                                                                                                                                                                                                                                                                                                                                                               |
| 18 |                                                     |            |                                                                                                                                                                                                                                                                                                                                                                                                                                                                                                                                                                                                                                                                                                                                                                                                                                                                                                                                                                                                                               |
| 19 |                                                     |            |                                                                                                                                                                                                                                                                                                                                                                                                                                                                                                                                                                                                                                                                                                                                                                                                                                                                                                                                                                                                                               |
| 20 | Kennelly et al. (2020) <sup>50</sup>                | Facilities | Outbreak recorded in 75.0% (21/28) of facilities – four public and seventeen private. During the study period, 40.1% of residents in 21 nursing homes with outbreaks had a laboratory diagnosis of COVID-19. Correlation between the proportion of symptomatic staff and number of residents with confirmed/suspected COVID-19 ( $\rho=0.81$ ). No significant correlation between the proportion of asymptomatic staff and number of residents with confirmed/suspected COVID-19 ( $\rho=0.18$ $p=0.61$ ).                                                                                                                                                                                                                                                                                                                                                                                                                                                                                                                   |
| 21 |                                                     |            |                                                                                                                                                                                                                                                                                                                                                                                                                                                                                                                                                                                                                                                                                                                                                                                                                                                                                                                                                                                                                               |
| 22 |                                                     |            |                                                                                                                                                                                                                                                                                                                                                                                                                                                                                                                                                                                                                                                                                                                                                                                                                                                                                                                                                                                                                               |
| 23 | Kim (2020) <sup>52</sup>                            | Facilities | After the management of the outbreak, there were no more infected persons. All patients and employees tested negative 14 days from the start of quarantine.                                                                                                                                                                                                                                                                                                                                                                                                                                                                                                                                                                                                                                                                                                                                                                                                                                                                   |
| 24 |                                                     |            |                                                                                                                                                                                                                                                                                                                                                                                                                                                                                                                                                                                                                                                                                                                                                                                                                                                                                                                                                                                                                               |
| 25 | McMichael et al. (2020) a <sup>28</sup>             | Facilities | February 28, 2020, four cases COVID-19 identified in County. One person identified as index case from Facility A. Staff roles for confirmed cases reported: therapists, nurses, nurse assistants, health information manager, physician, and case manager. Paper reports that 30 facilities in County had confirmed cases and provides detail on first 9 (Facilities A to I).<br>Facility A shared staff with another facility and two resident transfers from facility A. Surveillance reported inadequate PPE, training, infection control practices, lack of documentation signs and symptoms, working in unfamiliar facilities or sharing staff. On March 10, 2020, the governor of Washington implemented mandatory screening of health care workers and visitor restrictions for all licensed nursing homes and assisted living facilities including screening, testing, policies around visiting, excluding symptomatic staff, close monitoring of residents, testing, training and PPE. Monitoring of staff absences. |
| 26 |                                                     |            |                                                                                                                                                                                                                                                                                                                                                                                                                                                                                                                                                                                                                                                                                                                                                                                                                                                                                                                                                                                                                               |
| 27 |                                                     |            |                                                                                                                                                                                                                                                                                                                                                                                                                                                                                                                                                                                                                                                                                                                                                                                                                                                                                                                                                                                                                               |
| 28 |                                                     |            |                                                                                                                                                                                                                                                                                                                                                                                                                                                                                                                                                                                                                                                                                                                                                                                                                                                                                                                                                                                                                               |
| 29 |                                                     |            |                                                                                                                                                                                                                                                                                                                                                                                                                                                                                                                                                                                                                                                                                                                                                                                                                                                                                                                                                                                                                               |
| 30 |                                                     |            |                                                                                                                                                                                                                                                                                                                                                                                                                                                                                                                                                                                                                                                                                                                                                                                                                                                                                                                                                                                                                               |
| 31 |                                                     |            |                                                                                                                                                                                                                                                                                                                                                                                                                                                                                                                                                                                                                                                                                                                                                                                                                                                                                                                                                                                                                               |
| 32 |                                                     |            |                                                                                                                                                                                                                                                                                                                                                                                                                                                                                                                                                                                                                                                                                                                                                                                                                                                                                                                                                                                                                               |
| 33 | Office for National Statistics (2020) <sup>39</sup> | Facilities | For each additional member of infected staff working at the care home, the odds of resident infection increase by 11%, i.e. OR = 1.11 (95% CI: 1.1-1.11). Care homes using bank or agency nurses or carers most or every day more likely to have cases in residents (OR= 1.58, 95% CI: 1.5 - 1.65) compared to those who never use bank or agency staff. Residents in care homes outside of London had a lower chance of infection, except West Midlands (OR = 1.09, 95% CI: 1.0 - 1.17). Homes where staff receive sick pay are less likely to have resident cases (OR= 0.82 to 0.93, 95% CI: 7-18%), compared to homes where no sick leave. For each additional infected resident at a home, the odds of staff infection increase by 4% OR=1.04 (95% CI: 4 - 4%). Care homes using bank or agency staff most or every day OR=1.88 (95% CI: 1.77-2.0) compared to homes not using. Homes where staff regularly work elsewhere                                                                                                |
| 34 |                                                     |            |                                                                                                                                                                                                                                                                                                                                                                                                                                                                                                                                                                                                                                                                                                                                                                                                                                                                                                                                                                                                                               |
| 35 |                                                     |            |                                                                                                                                                                                                                                                                                                                                                                                                                                                                                                                                                                                                                                                                                                                                                                                                                                                                                                                                                                                                                               |
| 36 |                                                     |            |                                                                                                                                                                                                                                                                                                                                                                                                                                                                                                                                                                                                                                                                                                                                                                                                                                                                                                                                                                                                                               |
| 37 |                                                     |            |                                                                                                                                                                                                                                                                                                                                                                                                                                                                                                                                                                                                                                                                                                                                                                                                                                                                                                                                                                                                                               |
| 38 |                                                     |            |                                                                                                                                                                                                                                                                                                                                                                                                                                                                                                                                                                                                                                                                                                                                                                                                                                                                                                                                                                                                                               |
| 39 |                                                     |            |                                                                                                                                                                                                                                                                                                                                                                                                                                                                                                                                                                                                                                                                                                                                                                                                                                                                                                                                                                                                                               |
| 40 |                                                     |            |                                                                                                                                                                                                                                                                                                                                                                                                                                                                                                                                                                                                                                                                                                                                                                                                                                                                                                                                                                                                                               |
| 41 |                                                     |            |                                                                                                                                                                                                                                                                                                                                                                                                                                                                                                                                                                                                                                                                                                                                                                                                                                                                                                                                                                                                                               |
| 42 |                                                     |            |                                                                                                                                                                                                                                                                                                                                                                                                                                                                                                                                                                                                                                                                                                                                                                                                                                                                                                                                                                                                                               |
| 43 |                                                     |            |                                                                                                                                                                                                                                                                                                                                                                                                                                                                                                                                                                                                                                                                                                                                                                                                                                                                                                                                                                                                                               |
| 44 |                                                     |            |                                                                                                                                                                                                                                                                                                                                                                                                                                                                                                                                                                                                                                                                                                                                                                                                                                                                                                                                                                                                                               |
| 45 |                                                     |            |                                                                                                                                                                                                                                                                                                                                                                                                                                                                                                                                                                                                                                                                                                                                                                                                                                                                                                                                                                                                                               |
| 46 |                                                     |            |                                                                                                                                                                                                                                                                                                                                                                                                                                                                                                                                                                                                                                                                                                                                                                                                                                                                                                                                                                                                                               |



|                                     |            |                                                                                                                                                                                                                                                                                                                                                                                                                                                                                                                                                                                                                                                                                                                                                                                                                                                                                                                                                                                                                                                                                                                                                                                                                                                                                                                                                                                           |
|-------------------------------------|------------|-------------------------------------------------------------------------------------------------------------------------------------------------------------------------------------------------------------------------------------------------------------------------------------------------------------------------------------------------------------------------------------------------------------------------------------------------------------------------------------------------------------------------------------------------------------------------------------------------------------------------------------------------------------------------------------------------------------------------------------------------------------------------------------------------------------------------------------------------------------------------------------------------------------------------------------------------------------------------------------------------------------------------------------------------------------------------------------------------------------------------------------------------------------------------------------------------------------------------------------------------------------------------------------------------------------------------------------------------------------------------------------------|
|                                     |            | (most or every day) increase odds (OR=2.4, 95% CI: 1.92 - 3.0) compared to homes who never work elsewhere. Staff at homes outside London had higher odds of COVID-19 infection.                                                                                                                                                                                                                                                                                                                                                                                                                                                                                                                                                                                                                                                                                                                                                                                                                                                                                                                                                                                                                                                                                                                                                                                                           |
| Patel et al. (2020) <sup>29</sup>   | Facilities | First resident unwell March 9, female aged in her 60s with cough and fever. Hospitalized March 11 and tested positive COVID-19 March 13. 14 residents who were positive developed symptoms over 30 day follow up. 21% (n=7) confirmed cases lived in single occupancy rooms. 55% (n=18) were in a double room with another confirmed case, and 24% (n=8) were in a double room with a resident who was negative March 15. Screening visitors and staff for symptoms, restricting visiting hours from March 6. No visitor access from March 12. Universal masking of all staff and residents from March 14. 15th -19th March on-site team implemented assessment of symptoms, resident cohorting. Staff testing positive isolated and return 7 days or after 72 hours of symptoms resolving. Education and training to staff in facility A infection control, PPE, vital signs                                                                                                                                                                                                                                                                                                                                                                                                                                                                                                             |
| Quigley et al. (2020) <sup>31</sup> | Facilities | For-profit = 67.86%, non-profit = 26.79% and government-owned = 5.36%. 37.5% were part of a chain. 54% have COVID-19 plans. All had staff training for COVID-19 and 100% processes to restrict/ limit visitors. 29% conducted COVID-19 simulation training. Communication with local Public Health - 96%, and 68% linked to local hospital referral. 66% reported access to COVID-19 tests - available for all residents and 53% of staff. 72% reported inadequate PPE supplies. 83% expected staff shortages. Solutions for staff included staff volunteer for more shifts (55%), non-clinical staff used (45%). 19% reported they would use agency staff.                                                                                                                                                                                                                                                                                                                                                                                                                                                                                                                                                                                                                                                                                                                               |
| Sacco et al. (2020) <sup>45</sup>   | Facilities | Restrictions on residents from March 16 - social distancing, remain in single rooms, no communal dining or group activities. No visitors since March 10, individual walks outside only in the presence of one staff member. Mail and packages stored 24 hours before being delivered to residents. Enhanced hygiene and cleaning. Staff had permanent face masks and additional hand hygiene                                                                                                                                                                                                                                                                                                                                                                                                                                                                                                                                                                                                                                                                                                                                                                                                                                                                                                                                                                                              |
| Sanchez et al. (2020) <sup>33</sup> | Facilities | Of the 12 facilities in the final survey, eight had implemented cohorting in a dedicated COVID-19 unit before 1st follow up. 4 remaining initiating cohorting after receiving results. 4 facilities did not assign dedicated personnel to care for residents with COVID-19 due to staff shortages. Final survey census 80 residents (range 36 to 147). 373 of 1063 (35%) had received positive results 1st follow up.                                                                                                                                                                                                                                                                                                                                                                                                                                                                                                                                                                                                                                                                                                                                                                                                                                                                                                                                                                     |
| Stall (2020) <sup>43</sup>          | Facilities | Adjusted modelling odds of COVID-19 outbreak associated with for-profit status aOR 1.01 (95% CI: 0.64-1.57), Municipal aOR 0.83 (95% CI: 0.45-1.54). Model 2 + Health Region aOR 2.02 (95% CI: 1.20-3.38) population <10,000 rural aOR 0.27 (95% CI: 0.13-0.58); and model 3 + home characteristics. Number of residents (unit of 50) aOR 1.38 (95% CI: 1.18-1.61), older design aOR 1.55 (95% CI: 1.01-2.38), chain ownership vs single home aOR 1.47 (95% CI: 0.86 to 2.51) and staff (full time equivalent/ bed ratio aOR 1.98 (95% CI: 0.39-9.97). The extent of a COVID-19 outbreak with profit aRR 1.83 (95% CI: 1.18-2.84) vs municipal aRR 0.60 (95% CI: 0.28 -1.30) compared with non-profit. Health Region aRR 1.65 (95% CI: 1.02- 2.67), older design standards aRR (95% CI: 1.27 -2.79), chain ownership aRR 1.84 (95% CI: 1.08-3.15) and staff/ bed ratio a RR 0.73 (95% CI: 0.10-5.35). Deaths accounted for 6.5% of all residents in for-profit homes vs 5.5 % in non-profit vs 1.7% municipal LTCF. For-profit associated with total COVID-19 deaths aRR 1.78, (95% CI: 1.03 - 2.07). Adjusted model increased risk of death with for-profit aRR 0.82, (95% CI: 0.44- 1.54), older design facilities aRR 2.08 (95% CI: 1.28-3.36) and chain ownership aRR 1.89, (95% CI: 1.00- 3.59). Number of active residents was protective aRR 0.81, (95% CI: 0.70 -0.95) / 50 beds. |
| Unruh et al. (2020) <sup>35</sup>   | Facilities | 184 nursing homes (15.8%) had 6 or more COVID-19 deaths. Deaths associated with Medicaid patients (quintile 5: 8.6 PP greater probability vs quintile 1). Patients with higher ADL scores (2.6 (95% CI: 1.4-3.8) PP, p<0.001), more total beds (0.1 (95% CI: 0.0 to 0.1) PP, p<0.001), higher occupancy (0.3 (95% CI: 0.1-0.5) PP, p<0.009), for-profit status (4.8 (95% CI: 0.8-8.8) PP, p=0.019). Comparing States: Higher mortality in those with Medicaid (quintile 5: 6.1 (95% CI: 0.0-12.1) PP, p=0.048). Not significant for other States. More direct care hours per patient day associated with lower COVID-19 deaths All States (-4.8 95% CI: -9.4 - -0.03) PP, p<0.04).                                                                                                                                                                                                                                                                                                                                                                                                                                                                                                                                                                                                                                                                                                        |

1  
2  
3 OR, odds ratio; HR, hazard ratio; PPE, personal protective equipment; CI, confidence interval; LTCF, long-term care facility; aHR, adjusted hazard ratio;  
4  
5 aRR, adjusted relative risk; ADL, activities of daily living; PP, percentage points.  
6  
7  
8  
9  
10  
11  
12  
13  
14  
15  
16  
17  
18  
19  
20  
21  
22  
23  
24  
25  
26  
27  
28  
29  
30  
31  
32  
33  
34  
35  
36  
37  
38  
39  
40  
41  
42  
43  
44  
45  
46

For peer review only

### *Morbidity and mortality*

Morbidity and mortality results from included studies are presented for residents (Table 3a), staff (Table 3b), and visitors (Table 3c). Prevalence of COVID-19 infection was reported in 29 studies, including prevalence in residents (27 studies; <sup>17-29,32-34,38,39,41,43,45-50,53</sup>) and staff (22 studies; <sup>17,19-22,24,26-30,32,34,38,39,44-48,50,53</sup>), with 2 studies reporting absolute case numbers in visitors.<sup>28,47</sup> Prevalence rates ranged from 3.8% in a sample of 2074 LTCF<sup>48</sup> and 1.2% in the third point-prevalence survey at a single facility<sup>20</sup> to 85.4% in a single facility that implemented a telemedicine service to limit transmission.<sup>24</sup> Staff prevalence ranged from 0.6% in a point-prevalence survey in a single facility<sup>20</sup> to 62.6% in a group of nine LTCF.<sup>21</sup> One study reported 16 COVID-19 positive visitor cases,<sup>28</sup> while a study which examined SARS infection following an outbreak in a Hong Kong facility reported 3 positive visitor cases.<sup>47</sup>

The symptom status (symptomatic/presymptomatic/asymptomatic, typical/atypical symptoms) of participants was reported in 16 studies, with resident and staff symptom status reported in 15 <sup>17-19,21,22,25-27,29,32,33,45,48,50,53</sup> and 13 studies, <sup>19-22,26,27,29,32,44,45,48,50,53</sup> respectively. No studies reported symptom status of visitors. The proportion of COVID-19 positive residents presenting with symptoms ranged from 26.3%<sup>19,26</sup> to 59.8% (a sample of both residents and healthcare workers).<sup>27</sup> Asymptomatic cases in residents were reported in 13 studies, <sup>17,19,21,22,25-27,29,32,45,48,50,53</sup> with proportions of COVID-19 positive residents presenting with no symptoms varying from 2.4%<sup>45</sup> to 75.3%.<sup>48</sup> Among COVID-19 positive staff, the proportion of symptomatic cases ranged from 6.4%<sup>26</sup> to 100%,<sup>32</sup> and asymptomatic cases ranged from 23.6%<sup>50</sup> to 100%.<sup>20,22</sup>

Mortality results were reported in 22 studies, including information on mortality of residents (22 studies; <sup>17-19,22-24,27-29,33,34,37-43,45,47,49,50</sup>), staff (4 studies; <sup>28,34,45,47</sup>), and visitors (2 studies; <sup>28,47</sup>). Mortality rates in COVID-19 positive residents ranged from 5.3%<sup>19</sup> to 55.3%.<sup>38</sup> One study reported a 66.7% death rate in residents who tested positive for the SARS virus.<sup>47</sup> A study examining the mortality risk in Ontario LTCF reported a death rate of 0.1% across all residents.<sup>42</sup> Across the three studies which presented mortality results in COVID-19 positive staff, mortality rates were 0%.<sup>28,34,45</sup> One study presenting mortality rates in a nursing home following a SARS outbreak reported one death of a

1  
2  
3 member of staff.<sup>47</sup> Mortality rates reported in visitors in two studies was 0%<sup>47</sup> and 6.2%,<sup>28</sup>  
4  
5 respectively.  
6  
7

#### 8 *Characteristics of LTCFs on COVID-19 transmission*

9

10 Numerous facility-specific characteristics were linked with risk of COVID-19 cases (Table 2). These  
11 include size of LTCF,<sup>16,37,38,51</sup> staffing levels and/or use of agency care staff,<sup>28,31,36,38,39,43,50</sup> part of  
12  
13 larger chain of organisations and/or for profit status,<sup>16,31,35,42,43,50</sup> and related staffing, crowding, or  
14  
15 availability of single rooms.<sup>23,29,39,41,43,45-47</sup>  
16  
17  
18  
19  
20  
21  
22  
23  
24  
25  
26  
27  
28  
29  
30  
31  
32  
33  
34  
35  
36  
37  
38  
39  
40  
41  
42  
43  
44  
45  
46  
47  
48  
49  
50  
51  
52  
53  
54  
55  
56  
57  
58  
59  
60

Table 3a. Resident-specific outcomes of strategies implemented in nursing homes

| Study                                     | Interventions                                                                                                                                | Prevalence                                                                                                                          | Mortality                         | Other outcomes                                                                                                                                           |
|-------------------------------------------|----------------------------------------------------------------------------------------------------------------------------------------------|-------------------------------------------------------------------------------------------------------------------------------------|-----------------------------------|----------------------------------------------------------------------------------------------------------------------------------------------------------|
| Arons et al. (2020) <sup>17</sup>         | Mass testing (two point-prevalence surveys)<br>PPE                                                                                           | 48/76 (63%) across two surveys, 17/48 typical symptoms, 4/48 atypical symptoms, 3/48 asymptomatic, 24/48 presymptomatic             | 15/57 (26%)                       | Common symptoms: fever (71%), cough (54%), malaise (42%)<br>Estimated doubling time: 3.4 days (95% CI: 2.5-5.3)                                          |
| Blackman et al. (2020) <sup>18</sup>      | PPE<br>Symptom screening<br>Visitor restrictions                                                                                             | 57/89 through point-prevalence, clinical evaluation, post-mortem<br>12 positive cases, 2 awaiting results, 47 symptomatic residents | 3 COVID-19 related deaths         |                                                                                                                                                          |
| Borras-Bermejo et al (2020) <sup>53</sup> | Mass testing<br>Visitor restrictions                                                                                                         | 768/3214 (23.9%), 486 (69.5% of those with symptom information) were asymptomatic                                                   |                                   | 2624 of all residents reported symptoms in the previous 14 days                                                                                          |
| Brown et al. (2020) <sup>41</sup>         | Facility characteristics                                                                                                                     | 5218/78607 (6.6%)                                                                                                                   | 1452/5218 (27.8%)                 |                                                                                                                                                          |
| Burton et al. (2020) <sup>37</sup>        | Facility characteristics                                                                                                                     |                                                                                                                                     | 403 deaths recorded in care homes | 472 excess deaths in care homes with an outbreak (399 COVID-19 related)                                                                                  |
| Dora et al. (2020) <sup>19</sup>          | Mass testing (three point-prevalence surveys)<br>Symptom screening<br>Visitor restrictions<br>Hand hygiene, contact precautions<br>Cohorting | 19/96 (19.8%) across three surveys, 5/19 symptomatic, 8/19 presymptomatic, 6/19 asymptomatic                                        | 1/19 (5.3%)                       | Symptoms: fever (58%), myalgia (58%), cough (47%), dyspnoea (32%), nausea (32%)<br>Oxygen therapy required for 4/8 presymptomatic, 4/5 symptomatic cases |
| Duthey-Magni et al. (2020) <sup>38</sup>  | Mass testing                                                                                                                                 | 951/9339 (10.2%)                                                                                                                    | 526/951 (55.3%)                   | 2075/9339 (22.2%) experienced infection symptoms                                                                                                         |
| Eckardt et al. (2020) <sup>20</sup>       | Mass testing (three point-prevalence surveys)<br>PPE<br>Symptom screening<br>Visitor restrictions<br>Cohorting                               | Survey 1: 5/105 (4.8%)<br>Survey 2: 4/86 (4.7%)<br>Survey 3: 1/85 (1.2%)                                                            |                                   |                                                                                                                                                          |
| Feaster & Goh (2020) <sup>21</sup>        | Mass testing                                                                                                                                 | 408/582 (49.5%), 202/408 (49.5%) symptomatic<br>237/332 (71.4%) female residents positive,<br>121/237 (51.1%) asymptomatic          |                                   |                                                                                                                                                          |

|                                    |                                                          |                                                                                                                                                       |                 |                                                                                                                                                                                                                                                                                                                                                                                                                                                                                |
|------------------------------------|----------------------------------------------------------|-------------------------------------------------------------------------------------------------------------------------------------------------------|-----------------|--------------------------------------------------------------------------------------------------------------------------------------------------------------------------------------------------------------------------------------------------------------------------------------------------------------------------------------------------------------------------------------------------------------------------------------------------------------------------------|
|                                    |                                                          | 171/250 (68.4%) male residents positive, 81/171 (47.4%) asymptomatic                                                                                  |                 |                                                                                                                                                                                                                                                                                                                                                                                                                                                                                |
| Fisman et al. (2020) <sup>42</sup> | Facility characteristics                                 |                                                                                                                                                       | 83/79498 (0.1%) | IRR (COVID-19 related death in LTCF residents) = 13.1 (95% CI: 9.9-17.3) compared with community-living adults older than 69 years                                                                                                                                                                                                                                                                                                                                             |
| Graham et al (2020) <sup>22</sup>  | Mass testing (two point-prevalence surveys)<br>Cohorting | Survey 1: 126/313 (40%), 72/126 (57.1%) symptomatic, 50 typical symptoms, 22 atypical symptoms, 54/126 (42.9%) asymptomatic<br>Survey 2: 5/176 (2.8%) | 53/131 (40.4%)  | Increased risk of death: men (48% of deaths vs. 34% in those who survived; whole group 38% male, p=0.02); the trend for median age to be greater among those who died (p = 0.058)<br>Increased odds of COVID-19 positive: new onset anorexia (OR = 3.74, 95% CI: 1.5-9.8); cough and/or shortness of breath (OR = 3.72, 95% CI: 1.8-7.8); fever, altered mental state/behaviour, diarrhoea not associated with positive test<br>No new cases identified after November 18 2017 |
| Hand et al. (2018) <sup>23</sup>   | Symptom screening<br>Hand hygiene, contact precautions   | 20/130 residents suspected cases, 13/20 tested 7/13 (54%) tested positive; 6/7 required hospitalization                                               | 3/7 (42.9%)     | No new cases identified after November 18 2017                                                                                                                                                                                                                                                                                                                                                                                                                                 |
| Harris et al. (2020) <sup>24</sup> | Facility characteristics                                 | 41/48 (85.4%)<br>18/48 residents hospitalised, 11/18 returned to facility from hospital                                                               | 6/48 (12.5%)    | 13/48 (27.1%) of residents received telemedicine consultations<br>2/67 reported symptoms                                                                                                                                                                                                                                                                                                                                                                                       |
| Heung et al. (2006) <sup>46</sup>  | Hand hygiene, contact precautions                        | 2 residents were positive during the outbreak, 0/67 residents positive for SARS-CoV antibodies upon screening                                         |                 |                                                                                                                                                                                                                                                                                                                                                                                                                                                                                |
| Ho et al. (2004) <sup>47</sup>     | PPE<br>Cohorting                                         | 3 residents positive                                                                                                                                  | 2/3 (66.7%)     |                                                                                                                                                                                                                                                                                                                                                                                                                                                                                |
| Hoxha et al. (2020) <sup>48</sup>  | Mass testing                                             | 5390/142100 (3.8%), 4059/5390 (75.3%) asymptomatic                                                                                                    |                 | Infection odds: Women compared to men OR = 1.2 (95% CI: 1.1-1.2); symptomatic compared to asymptomatic OR = 8.5 (95% CI: 8.0-9.0)                                                                                                                                                                                                                                                                                                                                              |

1  
2  
3  
4  
5  
6  
7  
8  
9  
10  
11  
12  
13  
14  
15  
16  
17  
18  
19  
20  
21  
22  
23  
24  
25  
26  
27  
28  
29  
30  
31  
32  
33  
34  
35  
36  
37  
38  
39  
40  
41  
42  
43  
44  
45  
46

|                                                     |                                                                                                                                                     |                                                                                                                                                                                                                           |                                          |                                                                                                                                                                                                                                                                                                       |
|-----------------------------------------------------|-----------------------------------------------------------------------------------------------------------------------------------------------------|---------------------------------------------------------------------------------------------------------------------------------------------------------------------------------------------------------------------------|------------------------------------------|-------------------------------------------------------------------------------------------------------------------------------------------------------------------------------------------------------------------------------------------------------------------------------------------------------|
| Kennelly et al. (2020) <sup>50</sup>                | Mass testing<br>Facility characteristics                                                                                                            | 710/1741 (40.1%), 54/1741 (3.1%) residents were suspected COVID-19, 193/710 (27.2%) asymptomatic, 396/710 (55.8%) had recovered by the completion of surveillance period                                                  | 183/710 (25.8%)                          | Non-COVID-19 mortality rate similar between outbreak and non-outbreak NHS (5.1% vs. 4%, p=0.4)                                                                                                                                                                                                        |
| Kimball et al. (2020) <sup>25</sup>                 | Mass testing (three point-prevalence surveys)<br>PPE<br>Symptom screening<br>Visitor restrictions<br>Hand hygiene, contact precautions<br>Cohorting | 23/76 (30.3%), 10/23 symptomatic (8/10 typical symptoms, 2/10 atypical symptoms), 3/23 asymptomatic, 10/23 presymptomatic                                                                                                 |                                          | Symptoms: fever (61.5%), malaise (46.2%), cough (38.5),<br>Presymptomatic mean interval from testing to symptom onset was 3 days                                                                                                                                                                      |
| Klein et al. (2020) <sup>49</sup>                   | Mass testing<br>PPE<br>Visitor restrictions<br>Cohorting                                                                                            | 39/60 (65%)                                                                                                                                                                                                               | 8/39 (20.5%)                             | Symptoms: exhaustion, loss of appetite, dysphagia, fever, cough, colds, diarrhoea                                                                                                                                                                                                                     |
| Lennon et al. (2020) <sup>26</sup>                  | Mass testing                                                                                                                                        | 2654/16966 (15.5%), 1692/2654 (63.8%) asymptomatic, 699/2654 (26.3%) symptomatic, (263/2654 symptom data missing)                                                                                                         |                                          |                                                                                                                                                                                                                                                                                                       |
| Louie et al. (2020) <sup>27</sup>                   | Mass testing<br>Symptom screening<br>Visitor restrictions                                                                                           | 214/431 (49.7%) residents and healthcare workers, 128/214 (59.8%) symptomatic (78/128 were residents), 86/214 (40.2%) asymptomatic<br>Additional 156 asymptomatic residents subsequently tested: 63/156 COVID-19 positive | 12/78 (15.4%) symptomatic residents died | 22/78 (28.2%) symptomatic residents hospitalized                                                                                                                                                                                                                                                      |
| McMichael et al. (2020) <sup>a28</sup>              | Mass testing<br>PPE<br>Cohorting                                                                                                                    | 101/118 (58.6%)                                                                                                                                                                                                           | 34/101 (33.7%)                           | 55/101 (54.5%) hospitalized; (37/101 no data on hospitalisation status)                                                                                                                                                                                                                               |
| Office for National Statistics (2020) <sup>39</sup> | Mass testing<br>Facility characteristics                                                                                                            | 19.9% (95% CI: 18.5-21.3) in homes with a confirmed outbreak<br>10.7% (95% CI: 10.1-11.3) in all homes                                                                                                                    | 15606 across all homes                   | Odds of resident infection: Each additional infected staff member at a home OR = 1.11 (95% CI: 1.0-1.17)<br>Homes using bank or agency nurses most or all days OR = 1.58 (95% CI: 1.5-1.65) compared with homes never using these staff<br>Homes outside of London had lower infection chance, except |

|                                    |                                                                                                             |                                                                                                                                                                              |                                                                                                                            |                                                                                                                                                                                                                   |
|------------------------------------|-------------------------------------------------------------------------------------------------------------|------------------------------------------------------------------------------------------------------------------------------------------------------------------------------|----------------------------------------------------------------------------------------------------------------------------|-------------------------------------------------------------------------------------------------------------------------------------------------------------------------------------------------------------------|
|                                    |                                                                                                             |                                                                                                                                                                              |                                                                                                                            | West Midlands (OR = 1.09, 95% CI: 1.0-1.17)                                                                                                                                                                       |
|                                    |                                                                                                             |                                                                                                                                                                              |                                                                                                                            | Homes where staff receive sick pay OR = 0.82-0.93 (95% CI: unknown)                                                                                                                                               |
| Patel et al. (2020) <sup>29</sup>  | Mass testing<br>Symptom screening<br>Visitor restrictions<br>Cohorting                                      | 33/118 (28.0%), 19/33 (58%) symptomatic (8 typical symptoms, 4 atypical symptoms, 10 both typical and atypical symptoms); 1/33 (3%) presymptomatic, 13/33 (39%) asymptomatic | 10/35 (28.6%) (5/10 symptomatic)<br>30-day survival = 71% (95% CI 52-83)                                                   | 1/91 negative residents reported symptoms<br>35/90 negative asymptomatic residents developed symptoms during 30-day surveillance, 2/35 COVID-19 positive upon re-testing<br>13/35 COVID-19 residents hospitalized |
| Roxby et al. (2020) <sup>32</sup>  | Mass testing<br>Symptom screening<br>Visitor restrictions<br>Hand hygiene, contact precautions<br>Cohorting | Survey 1: 3/80 (3.8%), 1/3 reported resolved cough and loose stool during the preceding 14 days<br>Survey 2: 1/77 (1.3%)                                                     |                                                                                                                            | All residents clinically stable 14 days after second test<br>21 days after the test, all cases continued their usual state of health                                                                              |
| Sacco et al. (2020) <sup>45</sup>  | Mass testing<br>PPE<br>Visitor restrictions<br>Hand hygiene, contact precautions<br>Cohorting               | 41/87 (47.1%)<br>3/41 asymptomatic                                                                                                                                           | 11/41 (27%)<br>All-cause mortality: 13% (95% CI 7.2-21.2), compared to 3% for the same period during the previous 5 years  | 287/2773 (24%)<br>Incidence rate for residents = 1.54 per 100 person-days<br>14/87 (16.1%) residents hospitalized                                                                                                 |
| Sanchez et al (2020) <sup>33</sup> | Mass testing (two point-prevalence surveys)<br>Cohorting                                                    | Survey 1: 716/2218 (32.3%), 344/716 (48%) symptomatic<br>Survey 2: 115/637 (18.1%), 5/115 (4%) symptomatic<br>Total surveillance period: 1207/2773 (44%)                     |                                                                                                                            | 446/2773 (37%) hospitalised                                                                                                                                                                                       |
| Stall et al. (2020) <sup>43</sup>  | Facility characteristics                                                                                    | 5218/75676 (6.9%)<br>3599/5218 (69.0%) for-profit home residents<br>1239/5218 (23.7%) non-profit home residents<br>380/5218 (7.3%) municipal home residents                  | 1452/5218 (27.8%)<br>989/3599 (27.5%) for-profit home<br>368/1239 (29.7%) non-profit home<br>95/380 (25.0%) municipal home |                                                                                                                                                                                                                   |



1  
2  
3  
4  
5  
6  
7  
8  
9  
10  
11  
12  
13  
14  
15  
16  
17  
18  
19  
20  
21  
22  
23  
24  
25  
26  
27  
28  
29  
30  
31  
32  
33  
34  
35  
36  
37  
38  
39  
40  
41  
42  
43  
44  
45  
46

|                                    |                                                                                   |                                                                                                      |                                                                   |                                                                                                                                                                                                                                                                                                                     |
|------------------------------------|-----------------------------------------------------------------------------------|------------------------------------------------------------------------------------------------------|-------------------------------------------------------------------|---------------------------------------------------------------------------------------------------------------------------------------------------------------------------------------------------------------------------------------------------------------------------------------------------------------------|
| Stow et al. (2020) <sup>40</sup>   | Facility characteristics                                                          |                                                                                                      | 1532 COVID-19 related deaths                                      | Highest correlation of increased NEWS and deaths observed for a two-week lag (r=0.82, p<0.05)<br>Above baseline measures of high respiratory rate (r=0.73, p<0.05 for a two-week lag) and low oxygen saturation (r=0.8, p<0.05 for a two-week lag) appear to follow the pattern of COVID-19 and non-COVID-19 deaths |
| Telford et al (2020) <sup>34</sup> | Mass testing (15 facilities in response to outbreak, 13 facilities as prevention) | 821/2868 (28.6%)<br>Response group: 804/1703 (47.2%)<br>Preventive group: 17/1133 (1.5%), (p<0.0001) | Response group: 131/804 (16.3%)<br>Preventive group: 3/17 (17.6%) | Response group: 171/804 (21.3%) residents hospitalised<br>Preventive group: 5/17 (29.4%) residents hospitalised                                                                                                                                                                                                     |

PPE, personal protective equipment; CI, confidence interval; IRR, incidence risk ratio; LTCF, long-term care facility; OR, odds ratio; NEWS, national early warning score.

Table 3b. Staff-specific outcomes of strategies to reduce transmission

| Study                                     | Interventions                                                                              | Prevalence                                                                                                               | Mortality | Other outcomes                                                                          |
|-------------------------------------------|--------------------------------------------------------------------------------------------|--------------------------------------------------------------------------------------------------------------------------|-----------|-----------------------------------------------------------------------------------------|
| Arons et al. (2020) <sup>17</sup>         | Mass testing<br>PPE                                                                        | 26/51 (51.0%)<br>17/26 (65%) were nursing staff, 9/26 (35%) had roles that provided care/therapies across multiple units |           | 0/26 hospitalized                                                                       |
| Blackman et al. (2020) <sup>18</sup>      | PPE<br>Symptom screening<br>Visitor restrictions                                           |                                                                                                                          |           | 26 staff members absent from work due to sickness                                       |
| Borras-Bermejo et al (2020) <sup>53</sup> | Mass testing<br>Visitor restrictions                                                       | 403/2655 (15.2%), 144/403 (35.7%) asymptomatic                                                                           |           | 1772/2665 (66.7%) staff reported fever or respiratory symptoms in the preceding 14 days |
| Dora et al. (2020) <sup>19</sup>          | Mass testing (three point-prevalence surveys)<br>Symptom screening<br>Visitor restrictions | 8/136 (6%)<br>4/8 (50%) asymptomatic<br>3/8 nursing staff<br>5/8 licensed vocational nurses                              |           |                                                                                         |

|                                         |                                               |                                                         |  |                                                                                                                                                                                                                                                                                 |
|-----------------------------------------|-----------------------------------------------|---------------------------------------------------------|--|---------------------------------------------------------------------------------------------------------------------------------------------------------------------------------------------------------------------------------------------------------------------------------|
|                                         | Hand hygiene, contact precautions             |                                                         |  |                                                                                                                                                                                                                                                                                 |
|                                         | Cohorting                                     |                                                         |  |                                                                                                                                                                                                                                                                                 |
| Dutey-Magni et al. (2020) <sup>38</sup> | Mass testing                                  | 585/11604 (5.0%)                                        |  | 1892/11604 (16.3%) reported symptoms                                                                                                                                                                                                                                            |
| Eckardt et al. (2020) <sup>20</sup>     | Mass testing (three point-prevalence surveys) | Survey 1: 10/176 (5.7%), 10/10 (100%) asymptomatic      |  |                                                                                                                                                                                                                                                                                 |
|                                         | PPE                                           | Survey 2: 5/175 (2.9%), 5/5 (100%) asymptomatic         |  |                                                                                                                                                                                                                                                                                 |
|                                         | Symptom screening                             | Survey 3: 1/173 (0.6%), 1/1 (100%) asymptomatic         |  |                                                                                                                                                                                                                                                                                 |
|                                         | Visitor restrictions                          | asymptomatic                                            |  |                                                                                                                                                                                                                                                                                 |
|                                         | Cohorting                                     |                                                         |  |                                                                                                                                                                                                                                                                                 |
| Feaster & Goh (2020) <sup>21</sup>      | Mass testing                                  | 223/356 (62.6%), 55/223 (24.7%) asymptomatic            |  | Infection prevalence higher in staff with direct resident contact (150/219, 68.5%) compared with staff with no direct resident contact (25/52, 48.1%)                                                                                                                           |
| Fisman et al. (2020) <sup>42</sup>      | Facility characteristics                      |                                                         |  | Infection among LTCF staff was associated with death among residents with a 6-day lag (adjusted IRR for death per infected staff member, 1.17; 95% CI: 1.11-1.26) and a 2-day lag (relative increase in risk of death per staff member with infection, 1.20; 95% CI: 1.14-1.26) |
| Graham et al. (2020) <sup>22</sup>      | Mass testing (two point-prevalence surveys)   | 3/70 (4.3%)                                             |  | Staff absence due to sickness/self-isolation between March 1 and May 1 elevated relative to background level (215.9% increase, 95% CI: 80-352)                                                                                                                                  |
|                                         | Cohorting                                     | 3/3 (100%) asymptomatic                                 |  |                                                                                                                                                                                                                                                                                 |
| Guery et al. (2020) <sup>44</sup>       | Mass testing                                  | 3/136 (2.2%)                                            |  |                                                                                                                                                                                                                                                                                 |
|                                         |                                               | 1/3 (33.3%) asymptomatic                                |  |                                                                                                                                                                                                                                                                                 |
|                                         |                                               | 1/3 (33.3%) presymptomatic                              |  |                                                                                                                                                                                                                                                                                 |
|                                         |                                               | 1/3 (33.3%) symptomatic                                 |  |                                                                                                                                                                                                                                                                                 |
| Harris et al. (2020) <sup>25</sup>      | Facility characteristics                      | 7 staff COVID-19 positive prior to intervention         |  |                                                                                                                                                                                                                                                                                 |
|                                         |                                               | 0 further staff positive after intervention implemented |  |                                                                                                                                                                                                                                                                                 |

|    |                                                     |                                   |                                                                                                 |                                                                                                                                        |
|----|-----------------------------------------------------|-----------------------------------|-------------------------------------------------------------------------------------------------|----------------------------------------------------------------------------------------------------------------------------------------|
| 1  |                                                     |                                   |                                                                                                 |                                                                                                                                        |
| 2  |                                                     |                                   |                                                                                                 |                                                                                                                                        |
| 3  | Heung et al. (2006) <sup>46</sup>                   | Hand hygiene, contact precautions | 1 staff member SARS-CoV positive during outbreak (a domestic worker)                            |                                                                                                                                        |
| 4  |                                                     |                                   | 0/26 staff positive for SARS-CoV antibodies                                                     |                                                                                                                                        |
| 5  |                                                     |                                   |                                                                                                 |                                                                                                                                        |
| 6  | Ho et al. (2004) <sup>47</sup>                      | PPE                               | 1 staff member SARS positive                                                                    | 1/1 (100%)                                                                                                                             |
| 7  |                                                     | Cohorting                         |                                                                                                 |                                                                                                                                        |
| 8  | Hoxha et al. (2020) <sup>48</sup>                   | Mass testing                      | 2953/138327 (2.1%)                                                                              |                                                                                                                                        |
| 9  |                                                     |                                   | 2185/2953 (74.0%) asymptomatic                                                                  |                                                                                                                                        |
| 10 | Kennelly et al. (2020) <sup>50</sup>                | Mass testing                      | 675 staff COVID-19 positive                                                                     | Proportion of symptomatic staff correlated with number of residents with confirmed/suspected COVID-19, $\rho = 0.81$ ( $p < 0.001$ )   |
| 11 |                                                     | Facility characteristics          | 159/675 (23.6%) asymptomatic                                                                    |                                                                                                                                        |
| 12 |                                                     |                                   |                                                                                                 |                                                                                                                                        |
| 13 | Lennon et al. (2020) <sup>26</sup>                  | Mass testing                      | 624/15514 (4.1%)                                                                                |                                                                                                                                        |
| 14 |                                                     |                                   | 487/624 (78.0%) asymptomatic                                                                    |                                                                                                                                        |
| 15 |                                                     |                                   | 40/624 (6.4%) symptomatic                                                                       |                                                                                                                                        |
| 16 | Louie et al. (2020) <sup>27</sup>                   | Mass testing                      | 214/431 (49.7%) residents and staff COVID-19 positive                                           | 0/50 symptomatic health care workers hospitalized                                                                                      |
| 17 |                                                     | Symptom screening                 | 86/214 asymptomatic                                                                             |                                                                                                                                        |
| 18 |                                                     | Visitor restrictions              | 128/214 symptomatic (50/128 were health care workers)                                           |                                                                                                                                        |
| 19 |                                                     |                                   | Additional asymptomatic staff testing: 23/147                                                   |                                                                                                                                        |
| 20 |                                                     |                                   | (15.6%) staff COVID-19 positive                                                                 |                                                                                                                                        |
| 21 |                                                     |                                   |                                                                                                 |                                                                                                                                        |
| 22 | McMichael et al (2020) <sup>a28</sup>               | Mass testing                      | 50 staff COVID-19 positive                                                                      | 0/50 (0%)                                                                                                                              |
| 23 |                                                     | PPE                               |                                                                                                 |                                                                                                                                        |
| 24 |                                                     | Cohorting                         |                                                                                                 |                                                                                                                                        |
| 25 |                                                     |                                   |                                                                                                 | 3/50 (6%) hospitalised                                                                                                                 |
| 26 |                                                     |                                   |                                                                                                 | Staff roles for confirmed cases: therapists, nurses, nurse assistants, health information manager, physician, case manager             |
| 27 |                                                     |                                   |                                                                                                 | Odds of staff infection: for each additional infected resident, staff infection OR = 1.04 (95% CI: 1.04-1.04)                          |
| 28 | Office for National Statistics (2020) <sup>39</sup> | Mass testing                      | Estimated 6.9% (95% CI 5.9-7.9%) staff COVID-19 positive across homes that reported an outbreak | Care homes using bank or agency staff most or every day OR = 1.88 (95% CI: 1.77-2.0) compared to homes not using these staff           |
| 29 |                                                     | Facility characteristics          |                                                                                                 | Homes where staff work in other homes most or every day OR = 2.4 (95% CI: 1.92-3.0) compared to homes where staff never work elsewhere |
| 30 |                                                     |                                   |                                                                                                 |                                                                                                                                        |
| 31 |                                                     |                                   |                                                                                                 |                                                                                                                                        |
| 32 |                                                     |                                   |                                                                                                 |                                                                                                                                        |
| 33 |                                                     |                                   |                                                                                                 |                                                                                                                                        |
| 34 |                                                     |                                   |                                                                                                 |                                                                                                                                        |
| 35 |                                                     |                                   |                                                                                                 |                                                                                                                                        |
| 36 |                                                     |                                   |                                                                                                 |                                                                                                                                        |
| 37 |                                                     |                                   |                                                                                                 |                                                                                                                                        |
| 38 |                                                     |                                   |                                                                                                 |                                                                                                                                        |
| 39 |                                                     |                                   |                                                                                                 |                                                                                                                                        |
| 40 |                                                     |                                   |                                                                                                 |                                                                                                                                        |
| 41 |                                                     |                                   |                                                                                                 |                                                                                                                                        |
| 42 |                                                     |                                   |                                                                                                 |                                                                                                                                        |
| 43 |                                                     |                                   |                                                                                                 |                                                                                                                                        |
| 44 |                                                     |                                   |                                                                                                 |                                                                                                                                        |
| 45 |                                                     |                                   |                                                                                                 |                                                                                                                                        |
| 46 |                                                     |                                   |                                                                                                 |                                                                                                                                        |

|                                    |                                                                                                             |                                                                                                                                                                                                                                                                                                                                                                                                                                                                                                     |           |                                                                                                                                                                                        |
|------------------------------------|-------------------------------------------------------------------------------------------------------------|-----------------------------------------------------------------------------------------------------------------------------------------------------------------------------------------------------------------------------------------------------------------------------------------------------------------------------------------------------------------------------------------------------------------------------------------------------------------------------------------------------|-----------|----------------------------------------------------------------------------------------------------------------------------------------------------------------------------------------|
|                                    |                                                                                                             |                                                                                                                                                                                                                                                                                                                                                                                                                                                                                                     |           | Staff at homes outside London had higher odds of COVID-19 infection                                                                                                                    |
| Patel et al. (2020) <sup>29</sup>  | Mass testing<br>Symptom screening<br>Visitor restrictions<br>Cohorting                                      | 19/42 (45.2%)<br>11/19 symptomatic (57.9%)<br>8/19 (42.1%) asymptomatic                                                                                                                                                                                                                                                                                                                                                                                                                             |           |                                                                                                                                                                                        |
| Quicke et al. (2020) <sup>30</sup> | Mass testing (five point-prevalence surveys)                                                                | Site A: all staff uninfected<br>Site B: low prevalence in week 1, weeks 2-5 no infections detected, week 6 increase in cases<br>Site C: initial infection prevalence was lower (6.9%), and the incidence declined to zero by week 3<br>Site D: 22.5% of workers at site D had prevalent infections at the start of the study and incidence was high initially (12.2 per 100 workers per week), declining over time<br>Site E: low prevalence in week 1 saw an increase in cases in subsequent weeks |           |                                                                                                                                                                                        |
| Roxby et al. (2020) <sup>32</sup>  | Mass testing<br>Symptom screening<br>Visitor restrictions<br>Hand hygiene, contact precautions<br>Cohorting | 2/62 (3.2%) (1 worked in dining facilities, 1 was a health aide)<br>2/2 (100%) symptomatic                                                                                                                                                                                                                                                                                                                                                                                                          |           |                                                                                                                                                                                        |
| Sacco et al (2020) <sup>45</sup>   | Mass testing<br>PPE<br>Visitor restrictions<br>Hand hygiene, contact precautions<br>Cohorting               | 22 staff COVID-19 positive<br>9/22 (40.1%) asymptomatic                                                                                                                                                                                                                                                                                                                                                                                                                                             | 0/22 (0%) | Staff incidence: Care givers = 0.48/100 person-days<br>Non-care givers with resident contact = 0.36/100 person-days<br>Non-care givers with no resident contact = 0.04/100 person-days |
| Stall (2020) <sup>43</sup>         | Facility characteristics                                                                                    |                                                                                                                                                                                                                                                                                                                                                                                                                                                                                                     |           | Outbreak involving staff and residents' for-profit homes 59/360 and staff only 44/360<br>Non-profit homes staff only 18/162.<br>Municipal homes = outbreak staff only 16/101           |

1  
2  
3  
4  
5  
6  
7  
8  
9  
10  
11  
12  
13  
14  
15  
16  
17  
18  
19  
20  
21  
22  
23  
24  
25  
26  
27  
28  
29  
30  
31  
32  
33  
34  
35  
36  
37  
38  
39  
40  
41  
42  
43  
44  
45  
46

|                                    |                                                                                   |                                                                                                                                                                  |                                                                             |                                                                                                                        |
|------------------------------------|-----------------------------------------------------------------------------------|------------------------------------------------------------------------------------------------------------------------------------------------------------------|-----------------------------------------------------------------------------|------------------------------------------------------------------------------------------------------------------------|
| Telford et al (2020) <sup>34</sup> | Mass testing (15 facilities in response to outbreak, 13 facilities as prevention) | 264/2803 (9.4%)<br>Response group: 249/264 (94.3%)<br>Preventive group: 15/264 (5.7%) (d)<br>Prevalence: Response group 12.8% vs Preventive group 1.7%, p<0.0001 | 1/264 (0.4%)<br>Response group: 0/249 (0%)<br>Preventive group: 1/15 (6.7%) | 16/264 (6.1%) hospitalised<br>Response group: 15/249 (6.0%) hospitalised<br>Preventive group: 1/15 (6.7%) hospitalised |
|------------------------------------|-----------------------------------------------------------------------------------|------------------------------------------------------------------------------------------------------------------------------------------------------------------|-----------------------------------------------------------------------------|------------------------------------------------------------------------------------------------------------------------|

LTCF, long-term care facility; IRR, incidence risk ratio; CI, confidence interval.

Table 3c. Visitor-specific outcomes following the implementation of strategies

| Study                                 | Interventions                    | Prevalence                    | Mortality   | Other outcomes                                                                                                                                                                                 |
|---------------------------------------|----------------------------------|-------------------------------|-------------|------------------------------------------------------------------------------------------------------------------------------------------------------------------------------------------------|
| Ho et al. (2004) <sup>47</sup>        | PPE<br>Cohorting                 | 3 visitors SARS positive      | 0/3 (0%)    |                                                                                                                                                                                                |
| McMichael et al (2020) <sup>a28</sup> | Mass testing<br>PPE<br>Cohorting | 16 visitors COVID-19 positive | 1/16 (6.2%) | 8/16 (50%) hospitalized<br>Underlying conditions:<br>hypertension (2/8, 12.5%); cardiac disease (3/8, 18.8%); renal disease (2/8, 12.5%); obesity (3/8, 18.8%), pulmonary disease (2/8, 12.5%) |

PPE, personal protective equipment

### *Quality review*

The quality ratings of included studies are presented in Supplementary Table 2. Overall quality of evidence in this review is considered low based on MMAT assessment criteria.

### **Discussion**

Evidence in this review indicates the impact of COVID-19 on LTCF, demonstrating the vulnerability of this setting. A novel outcome highlights the characteristics of LTCF associated with COVID-19 outbreaks, in addition to reporting the prevalence rates of COVID-19 and associated mortality and morbidity for residents, staff, and visitors. A variety of measures were implemented in LTCF, of which many were instigated locally by facility managers, and others through agile public health policy. Mass testing of residents with or without staff testing was the primary measure used to reduce transmission of COVID-19. This provides objective evidence of infection rates in facilities, and enables application of subsequent measures, including isolation of residents who are infected with re-designation of specific staff to care for them. Repeated point-prevalence testing allows facilities to grasp the spread of the virus along with the impact of their mitigation strategies.

Further measures implemented in facilities echoed public health recommendations to the broader community to limit the spread of the virus. These included guidance on hand hygiene, and contact and droplet precautions. Restricting visitor access to facilities was implemented generally to reduce the likelihood of introducing COVID-19 into LTCF, with assessment of body temperature and symptom screening of staff and visitors on entry.

The prevalence of COVID-19 infection varied throughout included studies, with no distinct pattern emerging between prevention strategies and infection prevalence. Similarly, the mortality rate varied widely among studies and prevention measures. However, patterns emerged regarding associations between facility characteristics and the risk of a COVID-19 outbreak and spread.

The facility size/number of beds was significantly associated with the probability of having a COVID-19 case, and the resulting size of an outbreak. For example, in a sample of 30 US nursing homes, the probability of having a COVID -19 case was increased in medium and large facilities compared with

1  
2  
3 small facilities,<sup>16</sup> while in 121 UK homes reporting an outbreak, facilities with  $\geq 70$  beds had 80%  
4 greater infection rates than facilities with  $< 35$  beds.<sup>38</sup> A sample of 623 Canadian nursing homes  
5 demonstrated facilities with a high crowding index had more infections and deaths than those with a  
6 low crowding index. Simulations conducted suggested nearly 20% of infections and deaths may have  
7 been averted by converting all 4-bed rooms into 2-bed rooms.<sup>41</sup> Similarly, facilities with a greater  
8 number of staff, staff who work in multiple facilities, and greater number of infected staff, were also  
9 more likely to experience a COVID -19 outbreak.<sup>36,39,50</sup> However, facilities where staff receive sick  
10 leave were shown to be less likely to have positive cases.<sup>39</sup> Reduced availability of PPE predicted the  
11 spread and increase in case number in facilities,<sup>36</sup> while for-profit status of facilities was commonly  
12 identified as increasing the odds of case outbreaks relative to non-profit status.<sup>16,31,35,42,43</sup>

### 23 24 25 *Quality review*

26  
27  
28 The quality of evidence in this review is technically low, primarily reported from observational  
29 studies, expert opinion, reporting of outbreaks and describing the process and management  
30 (Supplementary Table 2). Factors associated with lower quality of evidence includes the reliance of  
31 self-reporting of symptoms, recall bias, use of datasets which may be incomplete, and use of  
32 convenience sampling. However, confirmation of COVID-19 in the majority of studies was via  
33 laboratory testing. We did not remove any study following our review of quality and the evidence is  
34 consistent with real time reporting of data to learn from outbreaks. The Institute of Medicine (2004)<sup>54</sup>  
35 advocates for early detection of epidemics, effective communication to the public, and promotion of  
36 research and development for strategic planning.

### 37 38 39 40 41 42 43 44 45 46 47 *Limitations in the review process*

48  
49  
50 A key strength of this review is that it addresses a knowledge gap and has collated evidence from a  
51 broad methodological base to report the measures to reduce transmission of COVID-19 in LTFC and  
52 reports characteristics of facilities.

53  
54  
55  
56  
57 Due to the heterogeneity of studies, meta-analysis was not performed, while the descriptive nature of  
58 studies prevents identification of a causative relationship between measures and outcomes. Despite  
59  
60

1  
2  
3 this, the systematic approach to this review has identified the scope of interventions implemented in  
4 LTFC to reduce COVID -19 transmission.  
5  
6

7  
8 Publication bias was minimized with inclusion of pre-published evidence, follow up contacts with  
9 authors for early reporting, and through the inclusion of observational study designs. Most studies  
10 reported are in English, we translated papers from German and Spanish as part of the assessment and  
11 review. Outbreak reports include convenience samples or smaller cohorts of residents in LTCF with  
12 limited data reported in brief reports and letters. However, real time reporting of outbreaks provides  
13 immediate evidence and shared understanding advocated by the Institute of Medicine.<sup>54</sup>  
14  
15  
16  
17  
18  
19

20  
21 While the present review builds on a review by Salcher-Konrad, Jhass, Naci, Tan, El-Tawil, Comas-  
22 Herrera <sup>55</sup>, a recent report from WHO,<sup>56</sup> and from an Irish review report,<sup>57</sup> data on the role of facilities  
23 in the transmission of COVID-19 are reported.  
24  
25  
26  
27

## 28 **Conclusion**

29  
30 This novel, rapid review summarises the evidence base to date identifying specific factors for  
31 consideration as part of preparedness plans to reduce transmission of COVID-19 outbreaks in LTCF.  
32  
33 Future research should incorporate methodologically robust study designs with longer follow up to  
34 assess the impact on reducing transmission.  
35  
36  
37  
38  
39  
40  
41  
42

## 43 **Funding**

44  
45 Authors declare no funds were provided for the production of this review.  
46  
47

## 48 **Author Contributions**

49  
50 CK, KF, and LM designed the study; KF and DS developed the search strategy; DS conducted the  
51 literature search; KF and LM screened titles and full texts to select studies, and extracted data; LM,  
52 EL, KF, and CK conducted quality ratings; all authors interpreted and synthesised data; all authors  
53 were involved in writing. All authors have approved the final version of the manuscript.  
54  
55  
56  
57  
58  
59  
60



## Conflicts of Interest

The authors declare no conflicts of interest. CK was a member of an expert panel investigating COVID-19 in nursing homes in Ireland.

## Data availability

No additional data available.

## References

1. European Centre for Disease Prevention and Control (ECDC). Timeline of ECDC's response to COVID-19. 2020; <https://www.ecdc.europa.eu/en/covid-19/timeline-ecdc-response>. Accessed 4th October, 2020.
2. World Health Organization. *Coronavirus disease 2019 (COVID-19) Situation Report – 94*. 2020.
3. Nussbaumer-Streit B, Mayr V, Dobrescu AI, et al. Quarantine alone or in combination with other public health measures to control COVID-19: a rapid review. *Cochrane Database Syst Rev*. 2020;4(4):Cd013574 doi: 10.1002/14651858.cd013574.
4. European Centre for Disease Prevention and Control (ECDC). Risk assessment: Outbreak of acute respiratory syndrome associated with a novel coronavirus, Wuhan, China. 2020; <https://www.ecdc.europa.eu/en/publications-data/rapid-risk-assessment-cluster-pneumonia-cases-caused-novel-coronavirus-wuhan>, 2020.
5. World Health Organization. Statement on the second meeting of the International Health Regulations (2005) Emergency Committee regarding the outbreak of novel coronavirus (2019-nCoV). . 2020; [https://www.who.int/news-room/detail/30-01-2020-statement-on-the-second-meeting-of-the-international-health-regulations-\(2005\)-emergency-committee-regarding-the-outbreak-of-novel-coronavirus-\(2019-ncov\)](https://www.who.int/news-room/detail/30-01-2020-statement-on-the-second-meeting-of-the-international-health-regulations-(2005)-emergency-committee-regarding-the-outbreak-of-novel-coronavirus-(2019-ncov)).
6. Meng X, Deng Y, Dai Z, Meng Z. COVID-19 and anosmia: A review based on up-to-date knowledge. *Am J Otolaryngol*. 2020;41(5):102581-102581 doi: 10.1016/j.amjoto.2020.102581.
7. European Centre for Disease Prevention and Control (ECDC). COVID-19 situation update worldwide, as of 5 October 2020. 2020; <https://www.ecdc.europa.eu/en/geographical-distribution-2019-ncov-cases>. Accessed 5th October, 2020.
8. European Centre for Disease Prevention and Control (ECDC). *Surveillance of COVID-19 at longterm care facilities in the EU/EEA. Technical Report*. 19 May 2020 2020.

- 1
  - 2
  - 3
  - 4
  - 5
  - 6
  - 7
  - 8
  - 9
  - 10
  - 11
  - 12
  - 13
  - 14
  - 15
  - 16
  - 17
  - 18
  - 19
  - 20
  - 21
  - 22
  - 23
  - 24
  - 25
  - 26
  - 27
  - 28
  - 29
  - 30
  - 31
  - 32
  - 33
  - 34
  - 35
  - 36
  - 37
  - 38
  - 39
  - 40
  - 41
  - 42
  - 43
  - 44
  - 45
  - 46
  - 47
  - 48
  - 49
  - 50
  - 51
  - 52
  - 53
  - 54
  - 55
  - 56
  - 57
  - 58
  - 59
  - 60
9. ECDC Public Health Emergency Team, Danis K, Fonteneau L, et al. High impact of COVID-19 in long-term care facilities, suggestion for monitoring in the EU/EEA, May 2020. *Euro Surveillance*. 2020;25(22):2000956 doi: 10.2807/1560-7917.ES.2020.25.22.2000956.
10. United Nations. *Policy Brief: The Impact of COVID-19 on older persons*. May 2020.
11. World Health Organization. *Policy Brief: The Impact of COVID-19 on older persons*. May 2020 2020.
12. Frazer K, Mitchell L, Stokes D, Crawley E, Kelleher CC. Systematic review of measures to protect older people in long term care facilities from COVID 19. *PROSPERO: International prospective register of systematic reviews*. 2020;CRD42020191569
13. Moher D, Liberati A, Tetzlaff J, Altman DG, The PRISMA Group. Preferred Reporting Items for Systematic Reviews and Meta-Analyses: The PRISMA Statement. *PLoS Medicine*. 2009;6(7):e1000097 doi: 10.1371/journal.pmed.1000097.
14. Hong QN, Fàbregues S, Bartlett G, et al. The Mixed Methods Appraisal Tool (MMAT) version 2018 for information professionals and researchers. *Education for Information*. 2018;34:285-291 doi: 10.3233/EFI-180221.
15. Campbell M, McKenzie JE, Sowden A, et al. Synthesis without meta-analysis (SWiM) in systematic reviews: reporting guideline. *BMJ*. 2020;368:l6890 doi: 10.1136/bmj.l6890.
16. Abrams HR, Loomer L, Gandhi A, Grabowski DC. Characteristics of U.S. Nursing Homes with COVID-19 Cases. *Journal of the American Geriatrics Society*. 2020 doi: 10.1111/jgs.16661.
17. Arons MM, Hatfield KM, Reddy SC, et al. Presymptomatic SARS-CoV-2 infections and transmission in a skilled nursing facility. *New England Journal of Medicine*. 2020;382(22):2081-2090 doi: 10.1056/NEJMoa2008457.
18. Blackman C, Farber S, Feifer RA, Mor V, White EM. An Illustration of SARS-CoV-2 Dissemination Within a Skilled Nursing Facility Using Heat Maps. *Journal of the American Geriatrics Society*. 2020;68(10):2174-2178 doi: 10.1111/jgs.16642.
19. Dora AV, Winnett A, Jatt LP, et al. Universal and Serial Laboratory Testing for SARS-CoV-2 at a Long-Term Care Skilled Nursing Facility for Veterans - Los Angeles, California, 2020. *MMWR Morbidity and mortality weekly report*. 2020;69(21):651-655 doi: 10.15585/mmwr.mm6921e1.
20. Eckardt P, Guran R, Hennemyre J, et al. Hospital affiliated long term care facility COVID-19 containment strategy by using prevalence testing and infection control best practices. *American Journal of Infection Control*. 2020 doi: <https://doi.org/10.1016/j.ajic.2020.06.215>.
21. Feaster M, Goh Y-Y. High Proportion of Asymptomatic SARS-CoV-2 Infections in 9 Long-Term Care Facilities, Pasadena, California, USA, April 2020. *Emerging Infectious Disease journal*. 2020;26(10):2416 doi: 10.3201/eid2610.202694.

- 1
- 2
- 3 22. Graham N, Junghans C, Downes R, et al. SARS-CoV-2 infection, clinical features and
- 4 outcome of COVID-19 in United Kingdom nursing homes. *J Infect.* 2020 doi:
- 5 10.1016/j.jinf.2020.05.073.
- 6
- 7
- 8 23. Hand J, Rose EB, Salinas A, et al. Severe Respiratory Illness Outbreak Associated with
- 9 Human Coronavirus NL63 in a Long-Term Care Facility. *Emerg Infect Dis.*
- 10 2018;24(10):1964-1966 doi: 10.3201/eid2410.180862.
- 11
- 12
- 13 24. Harris DA, Archbald-Pannone L, Kaur J, et al. Rapid Telehealth-Centered Response to
- 14 COVID-19 Outbreaks in Postacute and Long-Term Care Facilities. *Telemedicine and e-*
- 15 *Health.* 2020;0(0):null doi: 10.1089/tmj.2020.0236.
- 16
- 17 25. Kimball A, Hatfield KM, Arons M, et al. Asymptomatic and Presymptomatic SARS-CoV-2
- 18 Infections in Residents of a Long-Term Care Skilled Nursing Facility - King County,
- 19 Washington, March 2020. *MMWR Morbidity and mortality weekly report.* 2020;69(13):377-
- 20 381 doi: 10.15585/mmwr.mm6913e1.
- 21
- 22
- 23 26. Lennon NJ, Bhattacharyya RP, Mina MJ, et al. Comparison of viral levels in individuals with
- 24 or without symptoms at time of COVID-19 testing among 32,480 residents and staff of
- 25 nursing homes and assisted living facilities in Massachusetts. *medRxiv.*
- 26 2020:2020.2007.2020.20157792 doi: 10.1101/2020.07.20.20157792.
- 27
- 28
- 29 27. Louie JK, Scott HM, DuBois A, et al. Lessons from Mass-Testing for COVID-19 in Long
- 30 Term Care Facilities for the Elderly in San Francisco. *Clinical Infectious Diseases.* 2020 doi:
- 31 10.1093/cid/ciaa1020.
- 32
- 33 28. McMichael TM, Currie DW, Clark S, et al. Epidemiology of covid-19 in a long-term care
- 34 facility in King County, Washington. *New England Journal of Medicine.* 2020;382(21):2008-
- 35 2011 doi: 10.1056/NEJMoa2005412.
- 36
- 37 29. Patel MC, Chaisson LH, Borgetti S, et al. Asymptomatic SARS-CoV-2 Infection and
- 38 COVID-19 Mortality During an Outbreak Investigation in a Skilled Nursing Facility. *Clinical*
- 39 *Infectious Diseases.* 2020 doi: 10.1093/cid/ciaa763.
- 40
- 41 30. Quicke K, Gallichote E, Sexton N, et al. Longitudinal Surveillance for SARS-CoV-2 RNA
- 42 Among Asymptomatic Staff in Five Colorado Skilled Nursing Facilities: Epidemiologic,
- 43 Virologic and Sequence Analysis. *medRxiv.* 2020:2020.2006.2008.20125989 doi:
- 44 10.1101/2020.06.08.20125989.
- 45
- 46 31. Quigley DD, Dick A, Agarwal M, Jones KM, Mody L, Stone PW. COVID-19 Preparedness
- 47 in Nursing Homes in the Midst of the Pandemic. *Journal of the American Geriatrics Society.*
- 48 2020;68(6):1164-1166 doi: 10.1111/jgs.16520.
- 49
- 50 32. Roxby AC, Greninger AL, Hatfield KM, et al. Outbreak Investigation of COVID-19 among
- 51 Residents and Staff of an Independent and Assisted Living Community for Older Adults in
- 52 Seattle, Washington. *JAMA Internal Medicine.* 2020 doi: 10.1001/jamainternmed.2020.2233.
- 53
- 54
- 55
- 56
- 57
- 58
- 59
- 60

- 1  
2  
3 33. Sanchez GV, Biedron C, Fink LR, et al. Initial and Repeated Point Prevalence Surveys to  
4 Inform SARS-CoV-2 Infection Prevention in 26 Skilled Nursing Facilities — Detroit,  
5 Michigan, March–May 2020. *MMWR Morb Mortal Wkly Rep.* 2020;69:882-886 doi:  
6 <http://dx.doi.org/10.15585/mmwr.mm6927e1external>.  
7  
8  
9 34. Telford CT, Onwubiko U, Holland D, et al. Mass Screening for SARS-CoV-2 Infection  
10 among Residents and Staff in Twenty-eight Long-term Care Facilities in Fulton County,  
11 Georgia. *medRxiv.* 2020:2020.2007.2001.20144162 doi: 10.1101/2020.07.01.20144162.  
12  
13 35. Unruh MA, Yun H, Zhang Y, Braun RT, Jung H-Y. Nursing Home Characteristics  
14 Associated With COVID-19 Deaths in Connecticut, New Jersey, and New York. *Journal of*  
15 *the American Medical Directors Association.* 2020;21(7):1001-1003 doi:  
16 <https://doi.org/10.1016/j.jamda.2020.06.019>.  
17  
18 36. Brainard JS, Rushton S, Winters T, Hunter PR. Introduction to and spread of COVID-19 in  
19 care homes in Norfolk, UK. *medRxiv.* 2020:2020.2006.2017.20133629 doi:  
20 10.1101/2020.06.17.20133629.  
21  
22 37. Burton JK, Bayne G, Evans C, et al. Evolution and impact of COVID-19 outbreaks in care  
23 homes: population analysis in 189 care homes in one geographic region. *medRxiv.*  
24 2020:2020.2007.2009.20149583 doi: 10.1101/2020.07.09.20149583.  
25  
26 38. Dutey-Magni PF, Williams H, Jhass A, et al. Covid-19 infection and attributable mortality in  
27 UK Long Term Care Facilities: Cohort study using active surveillance and electronic records  
28 (March-June 2020). *medRxiv.* 2020:2020.2007.2014.20152629 doi:  
29 10.1101/2020.07.14.20152629.  
30  
31 39. Office for National Statistics. *Impact of coronavirus in care homes in England: 26 May to 19*  
32 *June 2020.* 2020.  
33  
34 40. Stow D, Barker RO, Matthews FE, Hanratty B. National Early Warning Scores (NEWS /  
35 NEWS2) and COVID-19 deaths in care homes: a longitudinal ecological study. *medRxiv.*  
36 2020:2020.2006.2015.20131516 doi: 10.1101/2020.06.15.20131516.  
37  
38 41. Brown KA, Jones A, Daneman N, et al. Association Between Nursing Home Crowding and  
39 COVID-19 Infection and Mortality in Ontario, Canada. *medRxiv.*  
40 2020:2020.2006.2023.20137729 doi: 10.1101/2020.06.23.20137729.  
41  
42 42. Fisman DN, Bogoch I, Lapointe-Shaw L, McCready J, Tuite AR. Risk Factors Associated  
43 With Mortality Among Residents With Coronavirus Disease 2019 (COVID-19) in Long-term  
44 Care Facilities in Ontario, Canada. *JAMA Network Open.* 2020;3(7):e2015957-e2015957 doi:  
45 10.1001/jamanetworkopen.2020.15957.  
46  
47 43. Stall NM, Jones A, Brown KA, Rochon PA, Costa AP. For-profit long-term care homes and  
48 the risk of COVID-19 outbreaks and resident deaths. *Cmaj.* 2020;192(33):E946-e955 doi:  
49 10.1503/cmaj.201197.  
50  
51  
52  
53  
54  
55  
56  
57  
58  
59  
60

- 1  
2  
3  
4  
5  
6  
7  
8  
9  
10  
11  
12  
13  
14  
15  
16  
17  
18  
19  
20  
21  
22  
23  
24  
25  
26  
27  
28  
29  
30  
31  
32  
33  
34  
35  
36  
37  
38  
39  
40  
41  
42  
43  
44  
45  
46  
47  
48  
49  
50  
51  
52  
53  
54  
55  
56  
57  
58  
59  
60
44. Guery R, Delaye C, Brule N, et al. Limited effectiveness of systematic screening by nasopharyngeal RT-PCR of medicalized nursing home staff after a first case of COVID-19 in a resident. *Médecine et Maladies Infectieuses*. 2020 doi: <https://doi.org/10.1016/j.medmal.2020.04.020>.
  45. Sacco G, Foucault G, Briere O, Annweiler C. COVID-19 in seniors: Findings and lessons from mass screening in a nursing home. *Maturitas*. 2020;141:46-52 doi: <https://doi.org/10.1016/j.maturitas.2020.06.023>.
  46. Heung LC, Li T, Mak SK, Chan WM. Prevalence of subclinical infection and transmission of severe acute respiratory syndrome (SARS) in a residential care home for the elderly. *Hong Kong Med J*. 2006;12(3):201-207.
  47. Ho WW, Hui E, Kwok TC, Woo J, Leung NW. An outbreak of severe acute respiratory syndrome in a nursing home. *J Am Geriatr Soc*. 2003;51(10):1504-1505 doi: 10.1046/j.1532-5415.2003.514841.x.
  48. Hoxha A, Wyndham-Thomas C, Klamer S, et al. Asymptomatic SARS-CoV-2 infection in Belgian long-term care facilities. *The Lancet Infectious Diseases*. 2020 doi: [https://doi.org/10.1016/S1473-3099\(20\)30560-0](https://doi.org/10.1016/S1473-3099(20)30560-0).
  49. Klein A, Edler C, Fitzek A, et al. Der erste COVID-19-Hotspot in einer Hamburger Senioreneinrichtung. *Rechtsmedizin*. 2020;30(5):325-331 doi: 10.1007/s00194-020-00404-1.
  50. Kennelly SP, Dyer AH, Martin R, et al. Asymptomatic carriage rates and case-fatality of SARS-CoV-2 infection in residents and staff in Irish nursing homes. *medRxiv*. 2020:2020.2006.2011.20128199 doi: 10.1101/2020.06.11.20128199.
  51. Iritani O, Okuno T, Hama D, et al. Clusters of COVID-19 in long-term care hospitals and facilities in Japan from 16 January to 9 May 2020. *Geriatrics & Gerontology International*. 2020;20(7):715-719 doi: 10.1111/ggi.13973.
  52. Kim T. Improving Preparedness for and Response to Coronavirus Disease 19 (COVID-19) in Long-Term Care Hospitals in the Korea. *Infect Chemother*. 2020.
  53. Borrás-Bermejo B, Martínez-Gómez X, San Miguel MG, et al. Asymptomatic SARS-CoV-2 Infection in Nursing Homes, Barcelona, Spain, April 2020. *Emerging Infectious Disease journal*. 2020;26(9):2281 doi: 10.3201/eid2609.202603.
  54. Institute of Medicine (IOM). Learning from SARS: Preparing for the Next Disease Outbreak: Workshop Summary. In: Knobler S, Mahmoud A, Lemon S, Mack A, Sivitz L, Oberholtzer K, eds. *Learning from SARS: Preparing for the Next Disease Outbreak: Workshop Summary*. Washington (DC): National Academies Press (US), Copyright © 2004, National Academy of Sciences.; 2004.
  55. Salcher-Konrad M, Jhass A, Naci H, Tan M, El-Tawil Y, Comas-Herrera A. COVID-19 related mortality and spread of disease in long-term care: a living systematic review of

1  
2  
3 emerging evidence. *medRxiv*. 2020:2020.2006.2009.20125237 doi:  
4 10.1101/2020.06.09.20125237.  
5

- 6 56. World Health Organization. *Preventing and managing COVID-19 across long-term care*  
7 *services: policy brief*. Geneva2020. WHO/2019-nCoV/Policy\_Brief/Long-term\_Care/2020.1.  
8  
9 57. Kelleher CC, Doherty B, Donnelly P, Twomey C. *COVID-19 Nursing Homes Expert Panel.*  
10 *Examination of Measures to 2021. Report to the Minister for Health*. 2020.  
11  
12  
13  
14  
15  
16  
17  
18  
19  
20  
21  
22  
23  
24  
25  
26  
27  
28  
29  
30  
31  
32  
33  
34  
35  
36  
37  
38  
39  
40  
41  
42  
43  
44  
45  
46  
47  
48  
49  
50  
51  
52  
53  
54  
55  
56  
57  
58  
59  
60

1  
2  
3 **Figure legends**  
4

5  
6 Figure 1. PRISMA flowchart  
7  
8  
9  
10  
11  
12  
13  
14  
15  
16  
17  
18  
19  
20  
21  
22  
23  
24  
25  
26  
27  
28  
29  
30  
31  
32  
33  
34  
35  
36  
37  
38  
39  
40  
41  
42  
43  
44  
45  
46  
47  
48  
49  
50  
51  
52  
53  
54  
55  
56  
57  
58  
59  
60

For peer review only

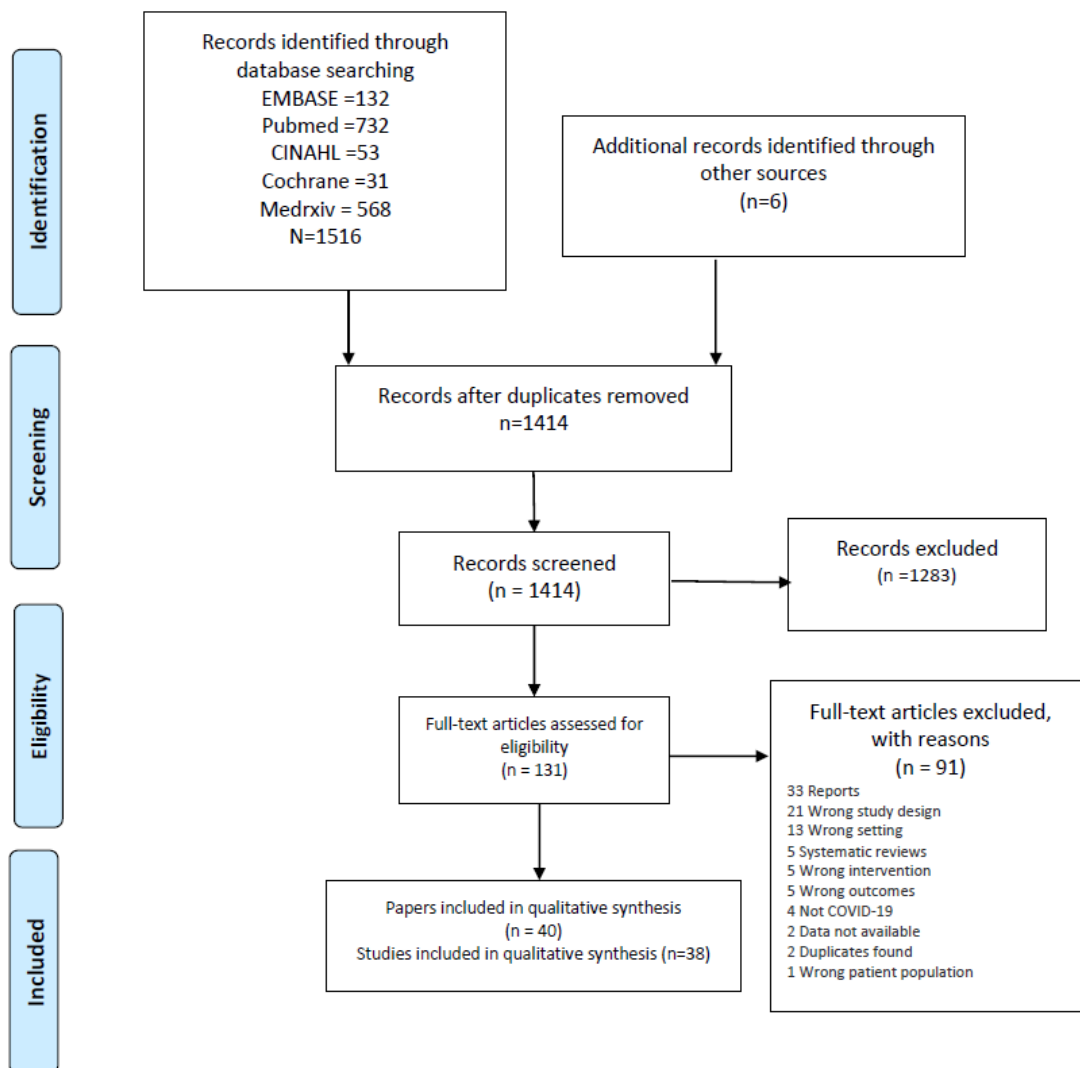

only



1  
2  
3  
4 Pubmed

5  
6 Search #1

7  
8 "Residential facilit\*" OR "Residential aged care" OR Convalescent home\* OR "Nursing  
9 Home\*" OR "Homes for the aged" OR "Housing for the elderly" OR "Skilled nursing facilit\*"  
10 OR "long term care" OR "Longterm care" OR Home\* for the aged OR "Old Age Home\*" OR  
11 "long-term care" OR "Nursing Homes"[Mesh] OR "long-term care"[MeSH] OR "Residential  
12 Facilities"[Mesh] OR "Housing for the Elderly"[Mesh]

13  
14  
15 213,035 Results

16  
17 Intervention

18  
19 Search #2

20  
21  
22 ("Infection control" OR Infection prevention and control\* OR "Patient Safety" OR "Patient  
23 harm" OR "Patient risk" OR "Health care Delivery" OR transmission OR body substance  
24 isolation\* OR physical barrier\* OR physical intervention\* OR physical protection\* OR  
25 personal protection\* OR person protection\* OR BSI OR IPC OR N95 OR ffp1 OR ffp3 OR  
26 ffp2 OR transmission\* OR contamination\* OR shedding OR fomite\* OR gap\* OR non-pharm  
27 intervention\* OR non-pharmaceutical intervention\* OR Shield OR N99 OR N97 OR  
28 Ventilator\* OR Space OR spacing or separation OR "Communicable Disease Control" OR  
29 "Primary Prevention" OR facemask\* OR face mask\* OR face-mask\* OR "Delivery of Health  
30 Care" OR "Disease transmission" OR "Infectious Disease Transmission" OR PPE OR  
31 "Personal Protective Equipment" OR mask\* OR virucide\* OR antiviral agent\* OR  
32 Handwashing OR "Hand washing" OR "Hand Disinfection" OR "hand hygiene" OR distancing  
33 OR distances OR aerosol-generating procedure\* OR patient isolation\* OR patient isolator\*  
34 OR person isolator\* OR "individual isolation" OR individual isolator\* OR filtering face piece\*  
35 OR face protection\* OR face shield\* OR face protective device\* OR face protective gear\*  
36 OR eye protection\* OR eye shield\* OR eye protective device\* OR eye protective gear\* OR  
37 Eye mask\* OR airborne precaution\* OR droplet precaution\* OR safety supply OR safety  
38 supplies\* OR safety device\* OR safety equipment\* OR safety measure\* OR safety gear\* OR  
39 protective supply\* OR protective supplies\* OR protective device\* OR protective equipment\*  
40 OR protective measure\* OR protective gear\* OR "personal isolation" OR respirator\* OR  
41 respiratory protection\* OR respiratory protective device\* OR "respiratory protective supply"  
42 OR "respiratory protective supplies" OR "respiratory protective equipment" OR "respiratory  
43 protective gear" OR "safely equipped" OR meter OR metre OR foot OR feet OR meters OR  
44 metres OR head cover\* OR face cover\* OR eye cover\* OR goggle\* OR protective clothing\*  
45 OR "Infection Control"[Mesh] OR "Personal Protective Equipment"[Mesh] OR "Hand  
46 Disinfection"[Mesh] OR "Communicable Disease Control"[Mesh:NoExp] OR "Disease  
47 Transmission, Infectious"[Mesh] OR "Primary Prevention"[Mesh] OR "Delivery of Health  
48 Care"[Mesh:NoExp] OR "Fomites"[Mesh] OR "Ventilators, Mechanical"[Mesh] OR  
49 "Communicable Disease Control"[Mesh] OR "Primary Prevention"[Mesh] OR "Delivery of  
50 Health Care"[Mesh] OR "Patient Isolation"[Mesh] OR "Patient Safety"[Mesh] OR "Patient  
51 Harm"[Mesh])

52  
53  
54  
55  
56  
57  
58  
59 5,741,706 results

1  
2  
3 And

4  
5 Search #3

6  
7 (Coronavirus\* OR "Corona virus" OR Betacoronavirus or Beta-coronavirus OR Corona\* OR  
8 coronaviral OR coronaviridae OR coronavirida OR coronaviridae OR coronaviridea OR  
9 coronaviridae OR coronavirinae OR coronavirion OR coronavirions OR coronavirose OR  
10 coronaviruslike OR coronaviser OR coronavirs OR coronaviruses OR coronavirius OR  
11 coronavirus OR COVIDOR SARS OR SARS-CoV OR "Middle East respiratory syndrome"  
12 OR MERS OR MERS-CoV OR "Severe Acute Respiratory Syndrome" OR "severe acute  
13 respiratory pneumonia outbreak" OR 2019-nCoV OR nCoV OR COVID-2019 OR "COVID  
14 2019" OR cov2 OR Covid19 OR COVID-19 OR COVID 19 OR SARS-CoV\* OR  
15 coronaviridae OR "corona virus" OR "SARS-CoV-2" OR "sars cov2" OR "SARS-CoV-19" OR  
16 2019nCoV OR "SARS-CoV" OR SARSCOV2 OR "2019 coronavirus" OR "SARS2" OR  
17 "2019 corona virus" OR covid19 OR "novel corona virus" OR "new corona virus" OR "novel  
18 coronavirus" OR "new coronavirus" OR "coronavirus infection" OR "nouveau coronavirus"  
19 OR "COVID-19" [Supplementary Concept] OR "severe acute respiratory syndrome  
20 coronavirus 2" [Supplementary Concept] OR "Coronavirus Infections"[Mesh] OR  
21 "Coronavirus"[Mesh] OR "Middle East Respiratory Syndrome Coronavirus"[Mesh] OR  
22 "Coronavirus Infections"[Mesh] OR "SARS Virus"[Mesh] OR "Betacoronavirus"[Mesh])

23  
24  
25  
26  
27  
28  
29 595,661 results

30  
31 Search #4 = #2 AND #3 116,217 results

32  
33 Outcomes

34  
35 Search #5

36  
37 Mortality OR "Death rate\*" OR "Mortality Rate\*" OR Morbidity OR "Risk of Infection" OR  
38 "infection risk" OR "Mortality"[Mesh:NoExp] OR "Morbidity"[Mesh]

39  
40  
41 3,204,107 results

42  
43 Search #6 = #1 AND #4 AND #5

44  
45  
46  
47  
48  
49  
50  
51  
52 EMBASE

53  
54 Search #1

55  
56 "Residential facilit\*" OR "Residential aged care" OR "Convalescent home\*" OR "Nursing  
57 Home\*" OR "Homes for the aged" OR "Housing for the elderly" OR "Skilled nursing facilit\*"  
58 OR "long term care" OR "Longterm care" OR "Home\* for the aged" OR "Old Age Home\*" OR

1  
2  
3 “long-term care” OR 'residential home'/exp OR 'nursing home'/exp OR 'home for the  
4 aged'/exp OR 'skilled nursing facility'/exp OR 'long term care'/de

5  
6 212,416 results

7  
8 Intervention

9  
10 Search #2

11  
12  
13 (“Infection control” OR “Infection prevention and control\*” OR “Patient Safety” OR “Patient  
14 harm” OR “Patient risk” OR “body substance isolation\*” OR “physical barrier\*” OR “physical  
15 intervention\*” OR “physical protection\*” OR “personal protection\*” OR “person protection\*”  
16 OR BSI OR IPC OR N95 OR ffp1 OR ffp3 OR ffp2 OR transmission\* OR contamination\* OR  
17 shedding OR fomite\* OR gap\* OR “non-pharm intervention\*” OR “non-pharmaceutical  
18 intervention\*” OR Shield OR N99 OR N97 OR Ventilator\* OR Space OR spacing OR  
19 separation OR “Communicable Disease Control” OR "Primary Prevention" OR facemask\*  
20 OR face-mask\* OR “face mask\*” OR "Delivery of Health Care" OR “Health Care Delivery”  
21 OR “Disease transmission” OR “Infectious Disease Transmission” OR PPE OR “Personal  
22 Protective Equipment” OR mask\* OR virucide\* OR antiviral agent\* OR Handwashing OR  
23 “Hand washing” OR “Hand Disinfection” OR “hand hygiene” OR distancing OR distances OR  
24 “aerosol-generating procedure\*” OR “patient isolation\*” OR “patient isolator\*” OR “person  
25 isolator\*” OR “individual isolation” OR “individual isolator\*” OR “filtering face piece\*” OR “face  
26 protection\*” OR “face shield\*” OR “face protective device\*” OR “face protective gear\*” OR  
27 “eye protection\*” OR “eye shield\*” OR “eye protective device\*” OR “eye protective gear\*” OR  
28 “Eye mask\*” OR “airborne precaution\*” OR “droplet precaution\*” OR “safety supply” OR  
29 “safety supplies\*” OR “safety device\*” OR “safety equipment\*” OR “safety measure\*” OR  
30 “safety gear\*” OR “protective supply\*” OR “protective supplies\*” OR “protective device\*” OR  
31 “protective equipment\*” OR “protective measure\*” OR “protective gear\*” OR “personal  
32 isolation” OR respirator\* OR “respiratory protection\*” OR “respiratory protective device\*” OR  
33 “respiratory protective supply” OR “respiratory protective supplies” OR “respiratory protective  
34 equipment” OR “respiratory protective gear” OR “safely equipped” OR meter OR metre OR  
35 foot OR feet OR meters OR metres OR “head cover\*” OR “face cover\*” OR “eye cover\*” OR  
36 goggle\* OR “protective clothing\*” OR 'infection control'/exp OR 'patient safety'/exp OR  
37 'disease transmission'/exp OR 'contamination'/exp OR 'shedding'/exp OR 'fomite'/exp OR  
38 'shield'/exp OR 'ventilator'/exp OR 'space'/exp OR 'separation'/exp OR 'communicable  
39 disease control'/exp OR 'primary prevention'/exp OR 'face mask'/exp OR 'health care  
40 delivery'/exp OR 'protective equipment'/exp OR 'mask'/exp OR 'antivirus agent'/exp OR  
41 'hand washing'/exp OR 'patient isolation'/exp OR 'face shield'/exp OR 'eye protective  
42 device'/exp OR 'ventilator'/exp OR 'respiratory protection'/exp OR 'goggle'/exp OR  
43 'protective clothing'/exp)

44  
45  
46 6,030,646 results

47  
48 And

49  
50 Search #3

51  
52  
53 (Coronavirus\* OR “Corona virus” OR Betacoronavirus or Beta-coronavirus OR Corona\* OR  
54 coronaviral OR coronaviridae OR coronavirida OR coronaviridae OR coronaviridea OR  
55  
56  
57  
58  
59  
60

1  
2  
3 coronaviridae OR coronavirinae OR coronavirion OR coronavirions OR coronavirose OR  
4 coronavirus OR coronaviruses OR coronavirus OR coronaviruses OR coronaviruses OR  
5 coronaviruslike OR coronaviser OR coronaviruses OR coronaviruses OR coronavirus OR  
6 coronavirus OR COVIDOR SARS OR SARS-CoV OR "Middle East respiratory syndrome"  
7 OR MERS OR MERS-CoV OR "Severe Acute Respiratory Syndrome" OR "severe acute  
8 respiratory pneumonia outbreak" OR 2019-nCoV OR nCoV OR COVID-2019 OR "COVID  
9 2019" OR cov2 OR Covid19 OR COVID-19 OR COVID 19 OR SARS-CoV\* OR "SARS-CoV-  
10 2" OR "sars cov2" OR "SARS-CoV-19" OR 2019nCoV OR "SARS-CoV" OR SARSCOV2 OR  
11 "2019 coronavirus" OR "SARS2" OR "2019 corona virus" OR covid19 OR "novel corona  
12 virus" OR "new corona virus" OR "novel coronavirus" OR "new coronavirus" OR "coronavirus  
13 infection" OR "nouveau coronavirus" OR 'Coronavirinae'/exp OR 'Betacoronavirus'/exp OR  
14 'severe acute respiratory syndrome'/exp OR 'covid 19'/exp OR 'Coronavirus infection'/exp)

15  
16  
17  
18  
19 45,801 results

20  
21 Search #4 = #2 AND #3 27,921 results

22  
23 Outcomes

24  
25 Search #5

26  
27 Mortality OR "Death rate\*" OR "Mortality Rate\*" OR Morbidity OR "Risk of Infection" OR  
28 "Infection risk" OR 'mortality'/exp OR 'mortality rate'/exp OR 'morbidity'/exp OR 'infection  
29 risk'/exp

30  
31  
32 1,862,861 results

33  
34 Search #6 = #1 AND #4 AND #5

35  
36  
37  
38  
39  
40  
41 CINAHL

42  
43 Search #1

44  
45 "Residential facilit\*" OR "Residential aged care" OR "Convalescent home\*" OR "Nursing  
46 Home\*" OR "Homes for the aged" OR "Housing for the elderly" OR "Skilled nursing facilit\*"  
47 OR "long term care" OR "Longterm care" OR "Home\* for the aged" OR "Old Age Home\*" OR  
48 "long-term care" OR (MH "Residential Facilities") OR (MH "Nursing Homes+") OR (MH  
49 "Housing for the Elderly") OR (MH "Long Term Care")

50  
51  
52 83,231 results

53  
54 Intervention

55  
56 Search #2

("Infection control" OR "Infection prevention and control\*" OR "Patient Safety" OR "Patient harm" OR "Patient risk" OR "body substance isolation\*" OR "physical barrier\*" OR "physical intervention\*" OR "physical protection\*" OR "personal protection\*" OR "person protection\*" OR BSI OR IPC OR N95 OR ffp1 OR ffp3 OR ffp2 OR transmission\* OR contamination\* OR shedding OR fomite\* OR gap\* OR "non-pharm intervention\*" OR "non-pharmaceutical intervention\*" OR Shield OR N99 OR N97 OR Ventilator\* OR Space OR spacing OR separation OR "Communicable Disease Control" OR "Primary Prevention" OR facemask\* OR face-mask\* OR "face mask\*" OR "Delivery of Health Care" OR "Health Care Delivery" OR "Disease transmission" OR "Infectious Disease Transmission" OR PPE OR "Personal Protective Equipment" OR mask\* OR virucide\* OR antiviral agent\* OR Handwashing OR "Hand washing" OR "Hand Disinfection" OR "hand hygiene" OR distancing OR distances OR "aerosol-generating procedure\*" OR "patient isolation\*" OR "patient isolator\*" OR "person isolator\*" OR "individual isolation" OR "individual isolator\*" OR "filtering face piece\*" OR "face protection\*" OR "face shield\*" OR "face protective device\*" OR "face protective gear\*" OR "eye protection\*" OR "eye shield\*" OR "eye protective device\*" OR "eye protective gear\*" OR "Eye mask\*" OR "airborne precaution\*" OR "droplet precaution\*" OR "safety supply" OR "safety supplies\*" OR "safety device\*" OR "safety equipment\*" OR "safety measure\*" OR "safety gear\*" OR "protective supply\*" OR "protective supplies\*" OR "protective device\*" OR "protective equipment\*" OR "protective measure\*" OR "protective gear\*" OR "personal isolation" OR respirator\* OR "respiratory protection\*" OR "respiratory protective device\*" OR "respiratory protective supply" OR "respiratory protective supplies" OR "respiratory protective equipment" OR "respiratory protective gear" OR "safely equipped" OR meter OR metre OR foot OR feet OR meters OR metres OR "head cover\*" OR "face cover\*" OR "eye cover\*" OR goggle\* OR "protective clothing\*" OR (MH "Infection Control") OR (MH "Handwashing") OR (MH "Patient Safety") OR (MH "Disease Transmission+") OR (MH "Microbial Contamination") OR (MH "Ventilators, Mechanical") OR (MH "Masks") OR (MH "Health Care Delivery+") OR (MH "Protective Devices+") OR (MH "Patient Isolation+")

917,391 results

And

Search #3

(Coronavirus\* OR "Corona virus" OR Betacoronavirus or Beta-coronavirus OR Corona\* OR coronaviral OR coronaviridae OR coronavirida OR coronaviridae OR coronaviridea OR coronaviridae OR coronavirinae OR coronavirion OR coronavirions OR coronaviruses OR coronavirus OR coronavirues OR coronavirusce OR coronaviruse OR coronaviruses OR coronaviruslike OR coronaviser OR coronavirs OR coronaviruses OR coronavirius OR coronavirius OR COVIDOR SARS OR SARS-CoV OR "Middle East respiratory syndrome" OR MERS OR MERS-CoV OR "Severe Acute Respiratory Syndrome" OR "severe acute respiratory pneumonia outbreak" OR 2019-nCoV OR nCoV OR COVID-2019 OR "COVID 2019" OR cov2 OR Covid19 OR COVID-19 OR COVID 19 OR SARS-CoV\* OR "SARS-CoV-2" OR "sars cov2" OR "SARS-CoV-19" OR 2019nCoV OR "SARS-CoV" OR SARSCOV2 OR "2019 coronavirus" OR "SARS2" OR "2019 corona virus" OR covid19 OR "novel corona virus" OR "new corona virus" OR "novel coronavirus" OR "new coronavirus" OR "coronavirus infection" OR "nouveau coronavirus" OR (MH "Coronavirus+") OR (MH "Coronaviridae Infections+" ) )

1  
2  
3 141,416 results  
4

5 Search #4 = #2 AND #3 15,251 results  
6

7 Outcomes  
8

9 Search #5  
10

11 Mortality OR "Death rate\*" OR "Mortality Rate\*" OR Morbidity OR "Risk of Infection" OR  
12 "Infection risk" OR (MH "Mortality+") OR (MH "Morbidity+")  
13  
14

15 501,502 results  
16

17 Search #6 = #1 AND #4 AND #5  
18  
19

20  
21  
22 Cochrane library  
23  
24  
25

26 #1 MeSH descriptor: [Coronavirus Infections] explode all trees 179  
27

28 #2 MeSH descriptor: [Coronavirus] explode all trees 18  
29

30  
31 #3 Coronavirus OR "Corona virus" OR Betacoronavirus or Beta-coronavirus OR Corona  
32 OR coronaviral OR coronaviridae OR coronavirida OR coronaviridae OR coronaviridea OR  
33 coronaviridae OR coronavirinae OR coronavirion OR coronavirions OR coronaviruses OR  
34 coronavirous OR coronavirues OR coronavirusce OR coronaviruse OR coronaviruses OR  
35 coronaviruslike OR coronaviser OR coronavirs OR coronaviruses OR coronavirus OR  
36 coronavirus OR COVIDOR SARS OR SARS-CoV OR "Middle East respiratory syndrome"  
37 OR MERS OR MERS-CoV OR "Severe Acute Respiratory Syndrome" OR "severe acute  
38 respiratory pneumonia outbreak" OR nCoV OR COVID-2019 OR "COVID 2019" OR cov2  
39 OR Covid19 OR COVID-19 OR COVID 19 OR SARS-CoV\* OR coronaviridae OR "corona  
40 virus" OR "SARS-CoV-2" OR "sars cov2" OR "SARS-CoV-19" OR 2019nCoV OR "SARS-  
41 CoV" OR SARSCOV2 OR "2019 coronavirus" OR "SARS2" OR "2019 corona virus" OR  
42 covid19 OR "novel corona virus" OR "new corona virus" OR "novel coronavirus" OR "new  
43 coronavirus" OR "coronavirus infection" OR "nouveau coronavirus" 1173  
44  
45  
46

47 #4 #1 OR #2 OR #3 1173  
48

49 #5 "Infection control" OR Infection prevention and control\* OR "Patient Safety" OR  
50 "Patient harm" OR "Patient risk" OR "Health care Delivery" OR transmission OR body  
51 substance isolation\* OR physical barrier\* OR physical intervention\* OR physical protection\*  
52 OR personal protection\* OR person protection\* OR BSI OR IPC OR N95 OR ffp1 OR ffp3  
53 OR ffp2 OR transmission\* OR contamination\* OR shedding OR fomite\* OR gap\* OR non-  
54 pharm intervention\* OR non-pharmaceutical intervention\* OR Shield OR N99 OR N97 OR  
55 Ventilator\* OR Space OR spacing or separation OR "Communicable Disease Control" OR  
56 "Primary Prevention" OR facemask\* OR face mask\* OR face-mask\* OR "Delivery of Health  
57 Care" OR "Disease transmission" OR "Infectious Disease Transmission" OR PPE OR  
58  
59  
60



1  
2  
3 “Personal Protective Equipment” OR mask\* OR virucide\* OR antiviral agent\* OR  
4 Handwashing OR “Hand washing” OR “Hand Disinfection” OR “hand hygiene” OR distancing  
5 OR distances OR aerosol-generating procedure\* OR patient isolation\* OR patient isolator\*  
6 OR person isolator\* OR “individual isolation” OR individual isolator\* OR filtering face piece\*  
7 OR face protection\* OR face shield\* OR face protective device\* OR face protective gear\*  
8 OR eye protection\* OR eye shield\* OR eye protective device\* OR eye protective gear\* OR  
9 Eye mask\* OR airborne precaution\* OR droplet precaution\* OR safety supply OR safety  
10 supplies\* OR safety device\* OR safety equipment\* OR safety measure\* OR safety gear\* OR  
11 protective supply\* OR protective supplies\* OR protective device\* OR protective equipment\*  
12 OR protective measure\* OR protective gear\* OR “personal isolation” OR respirator\* OR  
13 respiratory protection\* OR respiratory protective device\* OR “respiratory protective supply”  
14 OR “respiratory protective supplies” OR “respiratory protective equipment” OR “respiratory  
15 protective gear” OR “safely equipped” OR meter OR metre OR foot OR feet OR meters OR  
16 metres OR head cover\* OR face cover\* OR eye cover\* OR goggle\* OR protective clothing\*  
17  
18  
19  
20 300480  
21

22 #6 MeSH descriptor: [Infection Control] explode all trees 1147  
23  
24 #7 MeSH descriptor: [Personal Protective Equipment] explode all trees 2284  
25  
26 #8 MeSH descriptor: [Hand Disinfection] explode all trees 378  
27  
28 #9 MeSH descriptor: [Communicable Disease Control] explode all trees 4791  
29  
30 #10 MeSH descriptor: [Disease Transmission, Infectious] explode all trees 856  
31  
32 #11 MeSH descriptor: [Primary Prevention] explode all trees 4005  
33  
34 #12 MeSH descriptor: [Delivery of Health Care] explode all trees 44666  
35  
36 #13 MeSH descriptor: [Fomites] explode all trees 9  
37  
38 #14 MeSH descriptor: [Ventilators, Mechanical] explode all trees 264  
39  
40 #15 MeSH descriptor: [Patient Isolation] explode all trees 51  
41  
42 #16 MeSH descriptor: [Patient Safety] explode all trees 580  
43  
44 #17 MeSH descriptor: [Patient Harm] explode all trees 3  
45  
46 #18 #5 OR #6 OR #7 OR #8 OR #9 OR #10 OR #11 OR #12 OR #13 OR #14 OR #15  
47 OR #16 OR #17 336372  
48  
49 #19 #18 AND #4 651  
50  
51  
52 #20 residential facilit\* OR residential aged care OR Convalescent home OR Nursing  
53 home\* OR Homes for the aged OR Housing for the elderly OR Skilled nursing facilit\* OR  
54 Long term care OR Longterm care OR Home\* for the aged OR old age home OR Long-term  
55 care 121379  
56  
57  
58  
59  
60

- 1  
2  
3 #21 MeSH descriptor: [Long-Term Care] explode all trees 1112  
4  
5 #22 MeSH descriptor: [Nursing Homes] explode all trees 1314  
6  
7 #23 MeSH descriptor: [Residential Facilities] explode all trees 1711  
8  
9 #24 MeSH descriptor: [Housing for the Elderly] explode all trees 39  
10  
11  
12 #25 #20 OR #21 OR #22 OR #23 OR #24 121450  
13  
14 #26 Mortality OR "Death rate\*" OR "Mortality Rate\*" OR Morbidity OR "Risk of Infection"  
15 OR "infection risk" 111129  
16  
17 #27 MeSH descriptor: [Mortality] explode all trees 12838  
18  
19 #28 MeSH descriptor: [Morbidity] explode all trees 14392  
20  
21  
22 #29 #26 OR #27 OR #28 124060  
23  
24 #30 #19 AND #25 AND #29  
25  
26  
27  
28  
29  
30

31 Medrxiv

32  
33 "((COVID-19 OR SARS-CoV-2) And ("Infection control")) AND (Mortality) AND ("nursing  
34 homes")"  
35  
36  
37  
38  
39  
40  
41  
42  
43  
44  
45  
46  
47  
48  
49  
50  
51  
52  
53  
54  
55  
56  
57  
58  
59  
60



Supplemental Table 2. Quality Review

|                             |                          | SI | S2 | 3.1 | 3.2 | 3.3 | 3.4 | 3.5 | 4.1 | 4.2 | 4.3 | 4.4 | 4.5 | Comments                                                                                                             |
|-----------------------------|--------------------------|----|----|-----|-----|-----|-----|-----|-----|-----|-----|-----|-----|----------------------------------------------------------------------------------------------------------------------|
| <b>Abrams (2020)</b>        | Quantitative descriptive | Y  | Y  |     |     |     |     |     | Y   | CT  | Y   | CT  | Y   |                                                                                                                      |
| <b>Arons (2020)</b>         | Quantitative descriptive | Y  | Y  |     |     |     |     |     | Y   | Y   | Y   | N   | Y   |                                                                                                                      |
| <b>Blackman 2020</b>        | Quantitative descriptive | Y  | Y  |     |     |     |     |     | Y   | N   | Y   | CT  | Y*  | *Data very limited to descriptive statistics (counts)                                                                |
| <b>Borras-Bermejo 2020</b>  | Quantitative descriptive | Y  | Y  |     |     |     |     |     | Y   | CT  | Y   | N   | Y*  | *Data minimal descriptive statistics. Reported as a brief letter.                                                    |
| <b>Brainard+ (2020)</b>     | Non-randomised           | Y  | Y  | CT  | Y   | Y   | CT  | Y   |     |     |     |     |     |                                                                                                                      |
| <b>Brown (2020) +</b>       | Non-randomised           | Y  | Y  | Y   | Y   | Y   | N   | Y   | Y   | Y   | Y   | Y   | Y   |                                                                                                                      |
| <b>Burton (2020) +</b>      | Quantitative descriptive | Y  | Y  |     |     |     |     |     | Y   | Y   | Y   | Y   | Y   |                                                                                                                      |
| <b>Dora (2020)</b>          | Quantitative descriptive | Y  | Y  |     |     |     |     |     | Y   | Y   | Y   | Y   | Y*  | *Data reporting descriptive data from an outbreak (counts and percentages)                                           |
| <b>Dutey-Magni (2020) +</b> | Non-randomised           | Y  | Y  | Y   | Y   | Y   | N   | Y   |     |     |     |     |     |                                                                                                                      |
| <b>Eckhardt (2020)</b>      | Quantitative descriptive | Y  | Y  |     |     |     |     |     | Y   | Y   | Y   | Y   | Y*  | *Limited descriptive data (point prevalence data, counts & percentages)                                              |
| <b>Feaster (2020)</b>       | Quantitative descriptive | Y  | Y  |     |     |     |     |     | Y   | Y   | Y   | Y   | Y   |                                                                                                                      |
| <b>Fisman (2020b)</b>       | Non-randomised           | Y  | Y  | Y   | Y   | Y   | N   | Y   |     |     |     |     |     |                                                                                                                      |
| <b>Graham (2020)</b>        | Quantitative descriptive | Y  | Y  |     |     |     |     |     | Y   | N   | Y   | Y   | Y   |                                                                                                                      |
| <b>Guery (2020)</b>         | Quantitative descriptive | Y  | Y  |     |     |     |     |     | Y   | Y   | Y   | Y   | Y*  | *Limited descriptive data reported. Outbreak reported as a published letter. Research letter reporting minimal data. |
| <b>Hand (2018)</b>          | Quantitative descriptive | Y  | CT |     |     |     |     |     |     |     |     |     |     |                                                                                                                      |
| <b>Harris (2020)</b>        | Quantitative descriptive | Y  | Y  |     |     |     |     |     | Y   | Y   | Y   | Y   | Y*  | *Data limited to descriptive statistics                                                                              |
| <b>Heung (2006)</b>         | Quantitative descriptive | Y  | Y  |     |     |     |     |     | Y   | Y   | Y   | N   | Y*  | *Limited descriptive data                                                                                            |
| <b>Ho (2003)</b>            | Quantitative descriptive | Y  | CT |     |     |     |     |     |     |     |     |     |     | Report of conference symposium. Limited details                                                                      |
| <b>Hoxha 2020</b>           | Quantitative descriptive | Y  | Y  |     |     |     |     |     | Y   | Y   | Y   | CT  | Y   |                                                                                                                      |
| <b>Iritani 2020</b>         | Non-randomised           | Y  | Y  | N   | CT  | Y   | Y   | CT  |     |     |     |     |     |                                                                                                                      |
| <b>Kennelly (2020) +</b>    | Quantitative descriptive | Y  | Y  |     |     |     |     |     | CT  | Y   | Y   | N   | Y   |                                                                                                                      |
| <b>Kim (2020)</b>           | Quantitative descriptive | Y  | CT |     |     |     |     |     | N   | N   | N   | N   | N   |                                                                                                                      |
| <b>Kimball (2020)</b>       | Quantitative descriptive | Y  | Y  |     |     |     |     |     | Y   | Y   | Y   | Y   | Y*  | *Data limited to descriptive statistics (counts/ percentages) brief report                                           |

|                                          |                                        |   |   |    |   |   |    |   |    |    |    |    |    |                                                                     |
|------------------------------------------|----------------------------------------|---|---|----|---|---|----|---|----|----|----|----|----|---------------------------------------------------------------------|
| <b>Klein (2020)</b>                      | Quantitative descriptive               | N | N |    |   |   |    |   |    |    |    |    |    | Autopsy reporting                                                   |
| <b>Lennon (2020) +</b>                   | Quantitative descriptive               | Y | Y |    |   |   |    |   | Y  | CT | Y  | Y  | Y  |                                                                     |
| <b>Louie (2020)</b>                      | Quantitative descriptive               | Y | Y |    |   |   |    |   | Y  | Y  | Y  | Y  | Y* | *Data limited to descriptive statistics presented in a brief report |
| <b>McMichael (2020b)</b>                 | Quantitative descriptive               | Y | Y |    |   |   |    |   | Y  | Y  | Y  | N  | Y* | *Data limited to descriptive statistics                             |
| <b>Office National Statistics (2020)</b> | Quantitative descriptive               | Y | Y |    |   |   |    |   | Y  | CT | Y  | CT | Y  |                                                                     |
| <b>Patel (2020)</b>                      | Longitudinal, Descriptive quantitative | Y | Y |    |   |   |    |   | Y  | Y  | Y  | Y  | Y  |                                                                     |
| <b>Quicke (2020) +</b>                   | Quantitative descriptive               | Y | Y |    |   |   |    |   | CT | CT | CT | CT | Y  | Limited data reported and virologic assay.                          |
| <b>Quigley (2020)</b>                    | Quantitative descriptive               | Y | Y |    |   |   |    |   | Y  | N  | Y  | N  | Y* | *Limited descriptive data reported in a research letter             |
| <b>Roxby (2020) JAMA</b>                 | Quantitative descriptive               | Y | Y |    |   |   |    |   | Y  | Y  | Y  | Y  | Y* | *Descriptive data reported                                          |
| <b>Sacco (2020)</b>                      | Quantitative descriptive               | Y | Y |    |   |   |    |   | Y  | Y  | Y  | Y  | Y  |                                                                     |
| <b>Sanchez (2020)</b>                    | Quantitative descriptive               | Y | Y |    |   |   |    |   | CT | CT | Y  | CT | Y* | *Descriptive data reported on prevalence (counts/ percentages)      |
| <b>Stall (2020) (CMAJ)</b>               | Non-randomised                         | Y | Y | CT | Y | Y | CT | Y |    |    |    |    |    |                                                                     |
| <b>Stow (2020) +</b>                     | Quantitative descriptive               | Y | Y |    |   |   |    |   | Y  | Y  | Y  | Y  | Y  |                                                                     |
| <b>Telford (2020)</b>                    | Non-randomised                         | Y | Y | CT | Y | Y | N  | Y |    |    |    |    |    |                                                                     |
| <b>Unruh (2020)</b>                      | Quantitative descriptive               | Y | Y |    |   |   |    |   | Y  | CT | Y  | Y  | Y  |                                                                     |

Y = Yes, N= No, CT= Can't tell

+ pre published manuscript available

# BMJ Open

## A rapid systematic review of measures to protect older people in long term care facilities from COVID-19

|                                 |                                                                                                                                                                                                                                                                                  |
|---------------------------------|----------------------------------------------------------------------------------------------------------------------------------------------------------------------------------------------------------------------------------------------------------------------------------|
| Journal:                        | <i>BMJ Open</i>                                                                                                                                                                                                                                                                  |
| Manuscript ID                   | bmjopen-2020-047012.R1                                                                                                                                                                                                                                                           |
| Article Type:                   | Original research                                                                                                                                                                                                                                                                |
| Date Submitted by the Author:   | 15-Apr-2021                                                                                                                                                                                                                                                                      |
| Complete List of Authors:       | Frazer, Kate; University College Dublin<br>Mitchell, Lachlan; University College Dublin,<br>Stokes, Diarmuid; University College Dublin<br>Lacey, Ella; University College Dublin<br>Crowley, Eibhlin; University College Dublin<br>Kelleher, Cecily; University College Dublin, |
| <b>Primary Subject Heading</b>: | Public health                                                                                                                                                                                                                                                                    |
| Secondary Subject Heading:      | Global health, Health policy                                                                                                                                                                                                                                                     |
| Keywords:                       | COVID-19, Public health < INFECTIOUS DISEASES, GERIATRIC MEDICINE                                                                                                                                                                                                                |
|                                 |                                                                                                                                                                                                                                                                                  |

SCHOLARONE™  
Manuscripts



I, the Submitting Author has the right to grant and does grant on behalf of all authors of the Work (as defined in the below author licence), an exclusive licence and/or a non-exclusive licence for contributions from authors who are: i) UK Crown employees; ii) where BMJ has agreed a CC-BY licence shall apply, and/or iii) in accordance with the terms applicable for US Federal Government officers or employees acting as part of their official duties; on a worldwide, perpetual, irrevocable, royalty-free basis to BMJ Publishing Group Ltd ("BMJ") its licensees and where the relevant Journal is co-owned by BMJ to the co-owners of the Journal, to publish the Work in this journal and any other BMJ products and to exploit all rights, as set out in our [licence](#).

The Submitting Author accepts and understands that any supply made under these terms is made by BMJ to the Submitting Author unless you are acting as an employee on behalf of your employer or a postgraduate student of an affiliated institution which is paying any applicable article publishing charge ("APC") for Open Access articles. Where the Submitting Author wishes to make the Work available on an Open Access basis (and intends to pay the relevant APC), the terms of reuse of such Open Access shall be governed by a Creative Commons licence – details of these licences and which [Creative Commons](#) licence will apply to this Work are set out in our licence referred to above.

Other than as permitted in any relevant BMJ Author's Self Archiving Policies, I confirm this Work has not been accepted for publication elsewhere, is not being considered for publication elsewhere and does not duplicate material already published. I confirm all authors consent to publication of this Work and authorise the granting of this licence.

1 A rapid systematic review of measures to protect older people in long term care facilities from  
2 COVID-19

3 Kate Frazer<sup>1\*</sup>, Lachlan Mitchell<sup>2,3\*</sup>, Diarmuid Stokes<sup>4</sup>, Ella Lacey<sup>5</sup>, Eibhlin Crowley<sup>6</sup>, Cecily  
4 Kelleher<sup>2,3</sup>.

- 5 1. School of Nursing, Midwifery and Health Systems, University College Dublin, Belfield,  
6 Dublin 4, Ireland
- 7 2. National Nutrition Surveillance Centre, University College Dublin, Belfield, Dublin 4, Ireland
- 8 3. School of Public Health, Physiotherapy and Sport Science, University College Dublin,  
9 Belfield, Dublin 4, Ireland
- 10 4. Health Sciences Library, University College Dublin, Belfield, Dublin 4, Ireland
- 11 5. School of Medicine, University College Dublin, Belfield, Dublin 4, Ireland
- 12 6. Office for Health Affairs, College of Health and Agricultural Science, University College  
13 Dublin, Belfield, Dublin 4, Ireland

14 \*Equal contribution

15 Corresponding author: Lachlan Mitchell

16 [Lachlan.mitchell@ucd.ie](mailto:Lachlan.mitchell@ucd.ie)

17 National Nutrition Surveillance Centre, University College Dublin, Belfield, Dublin 4, Ireland

18 Running title: Measures to protect older people from COVID-19

19 Word count: 2873

20 Abstract word count: 265

21 Keywords: Coronavirus, COVID-19, nursing homes, transmission

22

23

1  
2  
3 **24 Abstract**  
4

5  
6 **25 Objectives:** The global COVID-19 pandemic produced large-scale health and economic  
7  
8 **26 complications.** Older people and those with comorbidities are particularly vulnerable to this virus,  
9  
10 **27 with nursing homes and long term care facilities experiencing significant morbidity and mortality**  
11  
12 **28 associated with COVID-19 outbreaks.** The aim of this rapid systematic review was to investigate  
13  
14 **29 measures implemented in long term care facilities to reduce transmission of COVID-19 and their**  
15  
16 **30 effect on morbidity and mortality of residents, staff, and visitors.**

17  
18  
19 **31 Setting:** Long term care facilities.  
20  
21

22 **32 Participants:** Residents, staff and visitors of facilities.  
23  
24

25 **33 Primary and secondary outcome measures:** Databases (PubMed, EMBASE, CINAHL, Cochrane  
26  
27 **34 Databases and repositories and MedRxiv pre-published database) were systematically searched from**  
28  
29 **35 inception to July 27 2020 to identify studies reporting assessment of interventions to reduce**  
30  
31 **36 transmission of COVID-19 in nursing homes among residents, staff, or visitors. Outcome measures**  
32  
33 **37 include facility characteristics, morbidity data, case fatalities, and transmission rates. Due to study**  
34  
35 **38 quality and heterogeneity, no meta-analysis was conducted.**

36  
37  
38 **39 Results:** The search yielded 1414 articles, with 38 studies included. Reported interventions include  
39  
40 **40 mass testing, use of personal protective equipment, symptom screening, visitor restrictions, hand**  
41  
42 **41 hygiene and droplet/contact precautions, and resident cohorting. Prevalence rates ranged from 1.2-**  
43  
44 **42 85.4% in residents and 0.6-62.6% in staff. Mortality rates ranged from 5.3-55.3% in residents.**

45  
46  
47 **43 Conclusions:** Novel evidence in this review details the impact of facility size, availability of staff and  
48  
49 **44 practices of operating between multiple facilities, and for-profit status of facilities as factors**  
50  
51 **45 contributing to the size and number of COVID-19 outbreaks. No causative relationships can be**  
52  
53 **46 determined; however, this review provides evidence of interventions that reduce transmission of**  
54  
55 **47 COVID-19 in long term care facilities.**

56  
57  
58 **48 Trial registration:** The protocol is registered on PROSPERO (CRD42020191569).  
59  
60

1  
2  
3 49  
4  
5  
6 50  
7  
8  
9 51  
10  
11 52  
12  
13 53  
14  
15 54  
16  
17 55  
18  
19  
20 56  
21  
22  
23 57  
24  
25  
26 58  
27  
28  
29 59  
30  
31 60  
32  
33  
34 61  
35  
36  
37 62  
38  
39  
40 63  
41  
42 64  
43  
44  
45 65  
46  
47  
48 66  
49  
50  
51 67  
52  
53 68  
54  
55  
56 69  
57  
58  
59 70  
60

### **Strengths and Limitations of the Study**

- Evidence from 38 studies identifies the measures taken to reduce transmission of COVID-19 in long term care facilities.
- No limitations were placed on study type, and all languages were eligible for inclusion.
- Study quality was formally examined using the MMAT tool.
- Due to heterogeneity of included studies, meta-analysis was not able to be performed.

71

**72 Introduction**

73 Severe Acute Respiratory Syndrome Coronavirus-2 (SARS-CoV-2) is a novel virus, first identified in  
74 China in 2019, resulting in the current global pandemic in 2020.<sup>1</sup> The ensuing disease associated with  
75 infection from SARS-CoV-2, termed COVID-19, has produced large-scale public health and  
76 worldwide economic effects.<sup>2</sup>

77 The virus spreads between people through close contact and droplet transmission (coughs and  
78 sneezes). While most infected people will experience mild flu-like symptoms, others may become  
79 seriously ill and die.<sup>3</sup> At-risk groups include older people and those with underlying medical  
80 conditions, while men appear to have more susceptibility than women. Symptom severity varies;  
81 several individuals remain asymptomatic. Others experience fever, cough, sore throat, general  
82 weakness, and fatigue, while more severe respiratory illnesses and infections may result, which can be  
83 fatal.<sup>4,5</sup> Deterioration in clinical presentations can occur rapidly, leading to poorer health outcomes.  
84 Anosmia and ageusia are reported in evidence from South Korea, China, and Italy in patients with  
85 confirmed SARS-CoV-2 infection, in some cases in the absence of other symptoms.<sup>6</sup>

86 The World Health Organization (WHO) declared the COVID-19 outbreak constituted a Public Health  
87 Emergency of International Concern (PHEIC) on January 30, 2020.<sup>5</sup> Two primary goals of action  
88 were 1) to accelerate innovative research to help contain the spread and facilitate care for all affected,  
89 and 2) to support research priorities globally the learning from the pandemic response for  
90 preparedness. Globally, up to March 25, 2021, there are 123 636 852 cases of COVID-19 (following  
91 the applied case definitions and testing strategies in the affected countries) including 2 721 891  
92 deaths.<sup>7</sup> Within Europe, over 25 220 376 cases are reported, with 592 929 deaths.<sup>7</sup>

93 Given the infection and mortality figures noted, preventing and limiting transmission of the SARS-  
94 CoV-2 virus is advocated. International and national evidence mandates physical distancing, regular  
95 hand hygiene and cough etiquette, and limiting touching eyes, nose or mouth; in addition to regular  
96 cleaning of surfaces.<sup>8</sup>



1  
2  
3 97 As noted older people are an at-risk group for COVID-19, and throughout the pandemic, the impact  
4  
5 98 on this population has resulted in increased mortality, specifically those living in long term care  
6  
7 99 facilities (LTCF) where a high proportion of outbreaks with increased rates of morbidity and case  
8  
9 100 fatality in residents are recorded.<sup>9</sup> In several EU/EEA countries, LTCF deaths among residents,  
10  
11 101 associated with COVID-19, account for 37% to 66% of all COVID-19-related fatalities.<sup>9</sup> The specific  
12  
13 102 rationale for their increased susceptibility is less clear. Comorbidities including cardiovascular disease  
14  
15 103 and diabetes *may increase the chances of fatal disease, but they alone do not explain why age is an*  
16  
17 104 *independent risk factor.*<sup>10</sup> Molecular, biological, and immunological changes inform emergent viable  
18  
19 105 hypotheses.<sup>10</sup> The United Nations (UN) (2020) acknowledge that COVID-19 exposes the inequalities  
20  
21 106 in society and the failures expressed in the 2030 Agenda for Sustainable Development. The UN report  
22  
23 107 the disproportionate fatality rates in those aged over 80 years as five times the global average<sup>11</sup> and  
24  
25 108 suggest a need for a more *inclusive, equitable and age-friendly society, anchored in human rights*  
26  
27 109 (p.16).<sup>12</sup>

30  
31 110 The aim of this rapid review of the literature was to assess the extent to which measures implemented  
32  
33 111 in LTCF reduced transmission of COVID-19 (SARS-CoV-2) among residents, staff, and visitors, and  
34  
35 112 the effect of these measures on morbidity and mortality outcomes.

### 37 38 113 **Methods**

39  
40  
41 114 The protocol is registered on PROSPERO (CRD42020191569)<sup>13</sup> and reporting follows PRISMA  
42  
43 115 guidelines.<sup>14</sup> Ethical approval was not required for this systematic review.

#### 44 45 116 *Search strategy*

46  
47  
48 117 Search strategies comprised search terms both for keywords and controlled-vocabulary search terms  
49  
50 118 MESH and Emtree (see Supplementary Table 1 for full search terms). EMBASE (via OVID),  
51  
52 119 PubMed (via OVID), Cumulative Index to Nursing and Allied Health Literature (CINAHL),  
53  
54 120 Cochrane Database and Repository, and MedRxiv pre-published databases were searched. No time  
55  
56 121 limits were imposed, and databases were searched up to July 27, 2020. Reference lists of included  
57  
58 122 evidence were checked for further articles.

1  
2  
3 123 *Eligibility criteria*  
4  
5

6 124 All study designs (experimental, observational, and qualitative) are included, and no exclusions  
7  
8 125 placed on language. Included studies report an assessment of measures to reduce transmission of  
9  
10 126 COVID-19 (including SARS or MERS) in residents, employees, or visitors of LTCF. To provide as  
11  
12 127 comprehensive a review of the evidence we included any intervention implemented to reduce the  
13  
14 128 transmission of COVID-19 in long-term residential care facilities, including facility measures, social  
15  
16 129 distancing, use of personal protective equipment, and hand hygiene.  
17

18  
19 130 *Primary outcome measures*  
20  
21

22 131 Primary outcome measures are morbidity data, case fatality rates, reductions in reported transmission  
23  
24 132 rates, and facility characteristics associated with COVID-19 incidence.  
25

26  
27 133 *Selection of studies and data extraction*  
28  
29

30 134 Two authors developed search strings (DS & KF); all database searches were completed by one  
31  
32 135 author (DS) (Supplementary Table 1). Following de-duplication, references were uploaded into  
33  
34 136 Covidence management platform (LM), and two authors independently screened all titles and  
35  
36 137 abstracts (LM & KF). Full texts of all potentially eligible studies were independently reviewed by two  
37  
38 138 authors (LM & KF). Disagreements were resolved by discussion with a third author (CK). Data from  
39  
40 139 included studies were independently extracted in duplicate (LM & KF). A data extraction form was  
41  
42 140 developed and modified from documents used previously by authors (KF & CK). Extracted data  
43  
44 141 included study characteristics (title, lead author, year of publication, country, study setting, study  
45  
46 142 design), description of the intervention, number and characteristics of participants, outcomes, duration  
47  
48 143 of follow-up, sources of funding, peer review status). Study design (required for review of quality)  
49  
50 144 was independently assessed by two authors (LM & KF), with disagreements resolved by a third  
51  
52 145 author (CK).  
53

54  
55 146 *Assessment of Quality*  
56  
57  
58  
59  
60

1  
2  
3 147 Two review authors (LM & EL) independently assessed the quality of included studies using Mixed  
4  
5 148 Methods Assessment Tool (MMAT),<sup>15</sup> with disagreements resolved by a third author (KF) and  
6  
7 149 discussed with the lead author (CK) (Supplementary Table 2). The MMAT is used widely and  
8  
9 150 considered a valid indicator of methodological quality using instruments for non-randomised and  
10  
11 151 descriptive studies.

#### 152 *Data synthesis*

153 Meta-analysis was not possible due to heterogeneity in study designs, participants, outcomes, and  
154 nature of the interventions and no attempt was made to transform statistical data. The SWiM criteria<sup>16</sup>  
155 guide a narrative summary, with data presented in tabular format and subgroup reporting of  
156 population groups.

#### 157 *Patient and public involvement*

158 No patients were involved in this study.

### 159 **Results**

160 We identified 1414 articles, and 131 full-text articles were selected for review. After an evaluation  
161 against our inclusion criteria, 38 studies (40 papers) are included in this systematic review (Figure 1).

#### 162 *Study characteristics*

163 Geographically we report evidence from eleven countries; the majority (20 studies) are from USA<sup>17-36</sup>  
164 and UK.<sup>37-41</sup> We report evidence from Canada,<sup>42-44</sup> France,<sup>45 46</sup> Hong Kong,<sup>47 48</sup> Belgium,<sup>49</sup> Germany,<sup>50</sup>  
165 Ireland,<sup>51</sup> Japan,<sup>52</sup> Korea,<sup>53</sup> and Spain<sup>54</sup> (Table 1).

#### 166 *Infection control measures*

167 Twenty studies report the nature of LTCFs related to outbreaks and transmission of COVID-19  
168 infection (Table 2; <sup>17 24 29 30 32 34 36-40 42-44 46-48 51-53</sup>). Thirty studies (Table 3a; <sup>18-30 33-35 38-44 46-51 54</sup>) report  
169 evidence of measures to reduce transmission of COVID-19 in long-term residential care facilities for

1  
2  
3 170 residents, 25 studies (Table 3b; 18-23 25 27-31 33 35 39 40 43-49 51 54) report evidence for employee outcomes,  
4  
5 171 and two studies report evidence for visitors (Table 3c; 29 48).

6  
7  
8 172 A variety of infection control measures are described (Tables 1 and 3a-c) including: mass  
9  
10 173 testing/point-prevalence testing (22 studies; 18 20-23 26-31 33-35 39 40 45 46 49-51 54), use of personal protective  
11  
12 174 equipment (10 studies; 18 19 21 26 29 30 33 46 48 50), screening of residents, staff, or visitors for symptoms (8  
13  
14 175 studies; 19-21 24 26 28 30 33), restrictions on visitor entry (10 studies; 19-21 26 28 30 33 46 50 54), hand hygiene and  
15  
16 176 contact and droplet precautions (6 studies; 20 24 26 33 46 47), and cohorting/isolation of residents (11  
17  
18 177 studies; 20 21 23 26 29 30 33 34 46 48 50). Thirteen studies examined characteristics of LTCF and their  
19  
20 178 association with COVID-19 infection and risk 17 25 32 36-38 40-44 52 53.

Table 1. Characteristics of studies including infection control measures

| Study ID                                   | Country                      | Study Design           | Setting                  | Population                                                                                                                                  | Intervention/infection control strategy                                                                                                                                                   | Outcome groups   | Outcome measures                                                                            |
|--------------------------------------------|------------------------------|------------------------|--------------------------|---------------------------------------------------------------------------------------------------------------------------------------------|-------------------------------------------------------------------------------------------------------------------------------------------------------------------------------------------|------------------|---------------------------------------------------------------------------------------------|
| Abrams et al. (2020) <sup>17</sup>         | USA                          | Cross sectional        | Nursing homes            | Nursing homes across 30 USA States (n=9395 nursing homes). N=6446 facilities without COVID-19 cases; n=2949 facilities with COVID-19 cases. | Nursing homes characteristics associated with COVID-19 outbreaks                                                                                                                          | Facilities       | Estimates on the relationship of nursing home characteristics and documented COVID-19 cases |
| Arons et al. (2020) <sup>18</sup>          | USA, King County, Washington | Cross sectional cohort | Nursing home facility    | Residents N=89<br>N=76 participated in point-prevalence testing.                                                                            | PPE (eye protection, gown, gloves, face masks); mass testing.                                                                                                                             | Residents, staff | COVID-19 prevalence, testing, symptoms, hospitalization, mortality                          |
| Blackman et al. (2020) <sup>19</sup>       | USA                          | Cross sectional        | Skilled nursing facility | A 150-bedded skilled nursing facility. Single story building with four units.                                                               | Employee and visitor screening on entry; visitor restrictions; review of PPE and infection control in the building; use of heat maps in a facility to track staff and residents' symptoms | Residents, staff | COVID-19 prevalence, testing, mortality                                                     |
| Borras-Bermejo et al. (2020) <sup>54</sup> | Spain                        | Cross sectional cohort | Nursing homes            | N=69 nursing homes in Barcelona.<br>N=3214 residents and N=2655 staff                                                                       | Surveillance testing program for COVID-19 in nursing homes; introduction of restrictions for visitors                                                                                     | Residents, staff | COVID-19 prevalence, testing, symptoms                                                      |

|                                         |                                              |                        |                                                        |                                                                                                                                                       |                                                                                                                                                                                                               |                                  |                                                                                                 |
|-----------------------------------------|----------------------------------------------|------------------------|--------------------------------------------------------|-------------------------------------------------------------------------------------------------------------------------------------------------------|---------------------------------------------------------------------------------------------------------------------------------------------------------------------------------------------------------------|----------------------------------|-------------------------------------------------------------------------------------------------|
| Brainard et al. (2020) <sup>37</sup>    | England, Norfolk                             | Retrospective cohort   | Care homes                                             | N=248 care homes                                                                                                                                      | Statistical modelling assessing detection of COVID-19 infection relative to PPE availability and impact of staffing by non-care workers                                                                       | Facilities                       | Descriptive data and statistical modelling for COVID-19, staffing levels, access to PPE         |
| Brown et al. (2020) <sup>42</sup>       | Canada, Ontario                              | Retrospective cohort   | Nursing homes                                          | N=623 nursing homes. N=78,607 residents                                                                                                               | Impact of home crowding on COVID-19 infection and mortality using nursing home crowding index score                                                                                                           | Residents, facilities            | COVID-19 incidence, modelling mortality and overcrowding adjusting for facility characteristics |
| Burton et al. (2020) <sup>40</sup>      | Scotland                                     | Cross sectional cohort | Nursing homes                                          | N=189 nursing homes included and data for 109 homes (57.7%) for older people reported, representing 5227 beds (89.5% of total beds in 189 care homes) | Surveillance data to understand the evolution of COVID-19 following outbreaks and care home characteristics in one health board                                                                               | Facilities, residents            | COVID-19 outbreaks, mortality, and facility characteristics                                     |
| Dora et al. (2020) <sup>20</sup>        | USA, California                              | Cross sectional        | Veterans Affairs Greater Los Angeles Healthcare System | N=3 skilled nursing facilities (n=150 long term beds)<br>N=99 residents (95% male, age range 50 to 100 years)<br>N=136 staff<br>Visitors              | Three point-prevalence surveys; visitor restrictions (initially all visitors screened, then no visitors permitted into buildings); staff screening; hand hygiene, droplet, and contact precautions; cohorting | Residents, staff                 | COVID-19 prevalence, symptoms, mortality                                                        |
| Dutey-Magni et al. (2020) <sup>39</sup> | UK (England, Scotland, and Northern Ireland) | Cohort                 | Long term care facilities                              | N=8713 resident's health records<br>Daily counts of infection in 9339 residents and for 11604 staff across 179 LTCF.                                  | The home testing program introduced for all staff and residents in Four Seasons Healthcare Group (representing 9% of all                                                                                      | Residents, staff, and facilities | Cumulative incidence of COVID-19, Kaplan-Meier estimates mortality and symptoms.                |

|                                    |                 |                        |                           |                                                                                                                                                                                                                                                                                                                                                              |                                                                                                                                         |                              |                                                                                                                                                                                   |
|------------------------------------|-----------------|------------------------|---------------------------|--------------------------------------------------------------------------------------------------------------------------------------------------------------------------------------------------------------------------------------------------------------------------------------------------------------------------------------------------------------|-----------------------------------------------------------------------------------------------------------------------------------------|------------------------------|-----------------------------------------------------------------------------------------------------------------------------------------------------------------------------------|
|                                    |                 |                        |                           |                                                                                                                                                                                                                                                                                                                                                              | long-term care beds). All tested at least once.                                                                                         |                              |                                                                                                                                                                                   |
| Eckardt et al (2020) <sup>21</sup> | USA, Florida    | Cross sectional cohort | Long term care            | 120-bedded long-term care facility.                                                                                                                                                                                                                                                                                                                          | PPE; staff and visitor screening; visitor restrictions; distancing of residents; cohorting exposed residents; point-prevalence testing. | Residents, staff             | COVID-19 prevalence                                                                                                                                                               |
| Feaster & Goh (2020) <sup>22</sup> | USA, Pasadena   | Cross sectional cohort | Long term care homes      | Residents and staff (n=1093) of LTCF (n=9) N=608 residents (age 78 ± 13.3 years; n=332 female) N=485 staff (age 41.8 ± 13.3 years; n=249 female)                                                                                                                                                                                                             | Mass surveillance testing                                                                                                               | Residents, staff             | COVID-19 prevalence, symptoms                                                                                                                                                     |
| Fisman et al. (2020) <sup>43</sup> | Canada, Ontario | Cohort                 | Long term care facilities | N=269 total individuals who died of COVID-19 in Ontario to April 11, 2020, and n=83 individuals who died of COVID-19 in Ontario LTCF to April 7, 2020. Denominators not available for long-term care residents approximated as the total number of long-term care facility beds in Ontario (79 498), assuming complete occupancy. Median beds 120 [9 to 543] | Surveillance data analysed to evaluate the risk of death and identification of risk factors for prevention strategies                   | Residents, staff, facilities | COVID-19-specific mortality incidence rate ratios (IRRs) of long term care residents were calculated with community-living Ontarians older than 69 years as the comparator group. |

|                                    |                |                        |                                       |                                                                                                               |                                                                                                                                                                                                                                                                                                                                                        |                       |                                                                                                                                       |
|------------------------------------|----------------|------------------------|---------------------------------------|---------------------------------------------------------------------------------------------------------------|--------------------------------------------------------------------------------------------------------------------------------------------------------------------------------------------------------------------------------------------------------------------------------------------------------------------------------------------------------|-----------------------|---------------------------------------------------------------------------------------------------------------------------------------|
| Graham et al. (2020) <sup>23</sup> | England        | Cross sectional cohort | Four nursing homes in London, England | N=4 nursing homes.<br>N=394 residents (37.6% male, median age 83 years [IQR 15], 75.4% white)<br>N=596 staff. | Mass surveillance testing; isolation of infected residents                                                                                                                                                                                                                                                                                             | Residents, staff      | COVID-19 prevalence, symptoms, mortality. Multivariable logistic regression of presenting symptoms in those who had an available test |
| Guery et al (2020) <sup>45</sup>   | France, Nantes | Cross sectional cohort | Nursing home                          | N=136 staff (age 39 years [IQR 27-48.5], n=112 female)                                                        | Surveillance testing of staff following confirmed index case                                                                                                                                                                                                                                                                                           | Staff                 | COVID-19 prevalence, symptoms                                                                                                         |
| Hand et al. (2018) <sup>24</sup>   | USA, Louisiana | Cross sectional cohort | Long term care facility               | Long term care facility provides services for up to 130 residents: report on 20 resident cases                | Outbreak surveillance after 20 cases reported. Adherence to standard droplet precautions for symptomatic residents                                                                                                                                                                                                                                     | Residents, facilities | Prevalence of Coronavirus NL63 symptoms, hospitalizations, mortality                                                                  |
| Harris et al. (2020) <sup>25</sup> | USA, Virginia  | Cross sectional cohort | Long term care facility               | N=41 of 48 residents (median age 75 years [44-104], 52.1% female (25/48). 60.4% White (29/48))<br>N=7 staff   | Following an outbreak, response developed for the management of residents and the use of telemedicine. Early identification of residents for escalation of care; monitoring and treating patients safe to remain in a facility; care coordination - bidirectional; daily needs assessment related to technology, infection control and staff wellbeing | Residents, staff      | COVID-19 prevalence, mortalities, comorbidities, telemedicine consultations                                                           |



|                                                                                                 |                                     |           |                        |                                                                                          |                                                                                                                                                                                                                                                                                                                       |                                                                                                                                                                             |                                        |                                                                                                     |
|-------------------------------------------------------------------------------------------------|-------------------------------------|-----------|------------------------|------------------------------------------------------------------------------------------|-----------------------------------------------------------------------------------------------------------------------------------------------------------------------------------------------------------------------------------------------------------------------------------------------------------------------|-----------------------------------------------------------------------------------------------------------------------------------------------------------------------------|----------------------------------------|-----------------------------------------------------------------------------------------------------|
| 1<br>2<br>3<br>4<br>5<br>6<br>7<br>8<br>9<br>10<br>11<br>12<br>13<br>14<br>15<br>16<br>17<br>18 | Heung et al (2006) <sup>47</sup>    | Hong Kong | Cross sectional cohort | Residential care home                                                                    | N=90 residents<br>N=32 staff<br>N=67/90 residents participated; n=7 (10%) aged 65 -75 years, n=32 (48%) 76-85 years, n=28 (42%) >85 years; n=53 (79%) females.<br>Staff 26/32 participated; n=18 (69%) aged 31-50 years, n=8 (31%) >50 years; 85% females; 54% nursing care role, 46% assistance in daily activities. | Surveillance screening in a residential care home with the introduction of infection control precautions: droplet and contact precautions                                   | Resident, staff, facilities            | Seroprevalence of SARS-CoV antibodies. Symptoms, transmission, and mortality                        |
| 19<br>20<br>21<br>22<br>23<br>24<br>25<br>26                                                    | Ho et al. (2004) <sup>48</sup>      | Hong Kong | Cross sectional cohort | Nursing home                                                                             | N=7 residents, staff, visitors in one nursing home (n=4 females aged in their 60s to 90s; n=3 males aged in their 20s to 80s)                                                                                                                                                                                         | Proposed intervention for future management. Community-based outreach teams led by geriatricians, nurses to closely monitor nursing home residents discharged from hospital | Residents, staff, visitors, facilities | Descriptive data on seven cases, the onset of illness, transmission and outcome including mortality |
| 27<br>28<br>29<br>30<br>31<br>32                                                                | Hoxha et al. (2020) <sup>49</sup>   | Belgium   | Cross sectional cohort | Long Term Care Facilities                                                                | Reporting for 2074 of 2500 invited facilities; 280,427 COVID-19 tests. 51% residents (N=142,100) and 49% staff (N=138,327)                                                                                                                                                                                            | Mass testing                                                                                                                                                                | Residents and staff                    | COVID-19 prevalence, symptoms, characteristics associated with positive test outcome                |
| 33<br>34<br>35<br>36<br>37<br>38<br>39<br>40<br>41<br>42<br>43<br>44<br>45<br>46                | Iritani et al. (2020) <sup>52</sup> | Japan     | Cross sectional cohort | Across long term care hospitals/facilities, general medical/welfare facilities, and non- | 381 clusters with 3786 infected cases accounting for 23.9% of 15,852 cases                                                                                                                                                                                                                                            | Following government recommendation suspension or restricting temporary use of LTCF in areas where infection prevalent                                                      | Facilities                             | Descriptive data on clusters reported, mortality data                                               |

|                                      |                              |                        |                                         |                                                                                                                                       |                                                                                                                                                     |                              |                                                                                                                                    |
|--------------------------------------|------------------------------|------------------------|-----------------------------------------|---------------------------------------------------------------------------------------------------------------------------------------|-----------------------------------------------------------------------------------------------------------------------------------------------------|------------------------------|------------------------------------------------------------------------------------------------------------------------------------|
|                                      |                              |                        | medical/welfare facilities              |                                                                                                                                       |                                                                                                                                                     |                              |                                                                                                                                    |
| Kennelly et al. (2020) <sup>51</sup> | Ireland                      | Cross sectional cohort | Nursing homes                           | Nursing home residents in three community health organizations in Ireland (N=28 nursing homes). Represents 2043 residents & 2303 beds | Mass surveillance testing; post testing program                                                                                                     | Staff, residents, facilities | COVID-19 prevalence, symptoms, clinical outcomes, including mortality. Characteristics of facilities associated with transmission. |
| Kim (2020) <sup>53</sup>             | Korea (South)                | Cross sectional cohort | Nursing home                            | N=142 nursing home residents<br>N=85 health care workers and caregivers working in one facility                                       | Procedures identified to reduce transmission of COVID-19 following confirmed case in a staff member                                                 | Facilities                   | Data on the preparedness of the facility to reduce transmission.                                                                   |
| Kimball et al. (2020) <sup>26</sup>  | USA, King County, Washington | Cross sectional cohort | Long-Term Care Skilled Nursing Facility | Nursing home. N=82 residents; 76/82 (92.7%) underwent symptom assessment and testing; three (3.7%) refused testing                    | Surveillance testing; PPE; hand hygiene; visitor restrictions; staff screening; daily resident symptom assessments; isolation of positive residents | Residents                    | COVID-19 prevalence and symptoms                                                                                                   |
| Klein et al (2020) <sup>52</sup>     | Germany, Hamburg             | Cross sectional        | Residential care facility               | N=60 resident and report from eight deceased residents.                                                                               | Mass testing; PPE; resident cohorting; visitor restrictions                                                                                         | Residents                    | COVID-19 prevalence and symptoms, management                                                                                       |

|                                         |                              |                        |                                                                   |                                                                                                                                                                                                                                                                               |                                                                                                                                                                                     |                                        |                                                                        |
|-----------------------------------------|------------------------------|------------------------|-------------------------------------------------------------------|-------------------------------------------------------------------------------------------------------------------------------------------------------------------------------------------------------------------------------------------------------------------------------|-------------------------------------------------------------------------------------------------------------------------------------------------------------------------------------|----------------------------------------|------------------------------------------------------------------------|
| Lennon et al. (2020) <sup>327</sup>     | USA, Massachusetts           | Cross sectional cohort | Skilled facilities, nursing homes and assisted living facilities  | N=366 skilled nursing facilities<br>N=32,480 residents and staff tested once, and 6.7% tested subsequently.<br>N=16,966 residents (mean age 82 ± 13; 65% female).<br>N=15,514 staff (mean age 45 ± 15; 76% female).                                                           | Mass testing and recording of symptoms, comparison of viral levels                                                                                                                  | Residents, staff                       | COVID-19 prevalence, symptoms                                          |
| Louie et al. (2020) <sup>28</sup>       | USA, San Francisco           | Cohort                 | Three skilled nursing facilities and one assisted living facility | N=431 residents and staff tested as part of initial surveillance.<br>Follow up testing of n=303 asymptomatic cases.                                                                                                                                                           | Mass surveillance testing; restrictions on visitors & non-essential staff; increased monitoring/screening of people entering/residing in a facility                                 | Residents, staff                       | COVID-19 prevalence, hospitalizations, fatalities, management          |
| McMichael et al. (2020) a <sup>29</sup> | USA, King County, Washington | Cross sectional cohort | Skilled Nursing Facility                                          | N=167<br>N=101 residents (median aged 83 (51-100), n=32 (31.7%) male, n=69 (68.3%) female).<br>N=50 health care personnel (median age 43.5 (21-79), n=12 (24%) males, n=38 (76%) female).<br>N=16 visitors (median age 72.5 (52-88), n=11 (68.7%) male, n=5 (31.2%) females). | Mass surveillance testing; contact tracing; quarantine of exposed persons; isolation of confirmed and suspected cases; on-site enhancement of PPE/infection prevention and control. | Residents, staff, visitors, facilities | COVID-19 prevalence, symptoms, mortality, hospitalizations, management |

|                                                     |                |                        |                                                                             |                                                                                                                                                                      |                                                                                                               |                              |                                                                                     |
|-----------------------------------------------------|----------------|------------------------|-----------------------------------------------------------------------------|----------------------------------------------------------------------------------------------------------------------------------------------------------------------|---------------------------------------------------------------------------------------------------------------|------------------------------|-------------------------------------------------------------------------------------|
| Office for National Statistics (2020) <sup>40</sup> | England        | Cross sectional cohort | Care homes providing care for older residents and those with dementia only. | N=9081 care homes for people aged 65 years and older - representing 292,301 residents (95% CI 293,168 to 293,434) and 441,498 staff. N=5126 homes participated (56%) | Prevalence of COVID-19 in residents and staff. Factors associated with higher levels of infection.            | Residents, staff, facilities | COVID-19 prevalence in residents aged 65 years and older and employees.             |
| Patel et al. (2020) <sup>30</sup>                   | USA, Illinois  | Cross sectional cohort | Nursing home (150 bedded unit)                                              | N=127 residents. 9% (n=11) single occupancy rooms, 91% (n=116) double occupancy rooms.                                                                               | Mass surveillance testing; screening of staff and visitors; visitor restrictions; cohorting of residents; PPE | Residents, staff, facilities | COVID-19 prevalence, symptoms, hospitalizations and survival rates, management      |
| Quicke et al. (2020) <sup>31</sup>                  | USA, Colorado  | Longitudinal cohort    | Five skilled nursing facilities                                             | N=454 staff                                                                                                                                                          | Weekly surveillance nasopharyngeal swabs tests were collected.                                                | Staff                        | COVID-19 prevalence and incidence, symptoms and information on genomic epidemiology |
| Quigley et al (2020) <sup>32</sup>                  | USA, 29 States | Cross sectional cohort | Nursing homes                                                               | N=56 nursing homes from 29 States: Midwest (30%), West (25%), Northeast (23%), South (22%).                                                                          | Reported on preparedness for COVID-19, testing, supplies and staffing levels                                  | Facilities                   | Preparedness of nursing home facilities during COVID-19                             |

|                                    |                          |                        |                                        |                                                                                                                                                                                                                                                                     |                                                                                                                        |                              |                                                                                                                              |
|------------------------------------|--------------------------|------------------------|----------------------------------------|---------------------------------------------------------------------------------------------------------------------------------------------------------------------------------------------------------------------------------------------------------------------|------------------------------------------------------------------------------------------------------------------------|------------------------------|------------------------------------------------------------------------------------------------------------------------------|
| Roxby et al. (2020) <sup>33</sup>  | USA, Seattle, Washington | Cross sectional cohort | Assisted living community older adults | Older aged residents and staff in an assisted living community.<br>N=80 residents (mean age 86 years (range, 69-102); n=62 (77%) female).<br>N=62 staff (mean age 40.0 ± 15; n=42 (68%) female).<br>N=83 private apartments, n=45 independent, n=38 assisted living | Mass testing; resident cohorting/isolation; PPE; staff screening; visitor screening; additional hand hygiene stations. | Residents, staff             | COVID-19 prevalence and symptoms                                                                                             |
| Sacco et al (2020) <sup>46</sup>   | France, Maine-et-Loire   | Cross sectional cohort | Nursing home                           | N=87 residents (age 87.9 ± 7.2; 71% female)<br>N=92 staff (age 38.3 ± 11.7; 89% female)                                                                                                                                                                             | Mass testing; PPE; visitor restrictions; hand hygiene; resident isolation                                              | Residents, staff, facilities | COVID-19 prevalence and case-fatality rates. Resident's clinical signs and symptoms obtained from retrospective chart audit. |
| Sanchez et al (2020) <sup>34</sup> | USA, Detroit             | Time series cohort     | Skilled Nursing Facilities             | N=26 skilled nursing facilities<br>N=2773 residents' tests reported at baseline (median age 72 years [IQR 64-82 years]); n=2218 1st follow up; n=637 2nd follow up                                                                                                  | Two point-prevalence surveys; follow up in 12 facilities following PPE guidelines; resident cohorting                  | Residents, facilities        | COVID-19 prevalence, hospitalizations, and deaths pre and post introduction of testing                                       |

1  
2  
3  
4  
5  
6  
7  
8  
9  
10  
11  
12  
13  
14  
15  
16  
17  
18  
19  
20  
21  
22  
23  
24  
25  
26  
27  
28  
29  
30  
31  
32  
33  
34  
35  
36  
37  
38  
39  
40  
41  
42  
43  
44  
45  
46

|                            |                 |                               |                                                           |                                                                                                                                                                                                                                |                                                                                                                                                                                                   |                                  |                                                                                                                                                                                                                                                                                                                                                                                                                                                       |
|----------------------------|-----------------|-------------------------------|-----------------------------------------------------------|--------------------------------------------------------------------------------------------------------------------------------------------------------------------------------------------------------------------------------|---------------------------------------------------------------------------------------------------------------------------------------------------------------------------------------------------|----------------------------------|-------------------------------------------------------------------------------------------------------------------------------------------------------------------------------------------------------------------------------------------------------------------------------------------------------------------------------------------------------------------------------------------------------------------------------------------------------|
| Stall (2020) <sup>44</sup> | Canada, Ontario | Retrospective cohort          | Nursing homes                                             | N=623 nursing homes (n=75,676 residents); 360/623 (57.7%) for-profit homes, 162/623 (26.0%) non-profit, 101/623 (16.2%) municipal homes. Mean number residents: n=113.2 (for profit); n=119.6 (non-profit); n=101 (municipal). | Impact of profit status at the level of a home rather than a resident. Using data from the Ontario Ministries of Health and Long-Term Care as part of the province's emergency "modelling table." | Facilities, residents, and staff | Descriptive data on outbreaks, facility characteristics and mortality rates. Nursing home profit status (for-profit, non-profit or municipal), nursing home COVID-19 outbreaks (at least one resident case), COVID-19 outbreak sizes (total number of confirmed resident cases amongst homes with outbreaks), and the total number of COVID-19 resident deaths (amongst homes with outbreaks). Outbreaks in staff reported. Death rates for residents |
| Stow (2020) <sup>41</sup>  | England         | Longitudinal ecological study | Care home units from 46 local authority areas in England. | N=460 care home units<br>N=6,464 residents                                                                                                                                                                                     | Use of National Early Warning Score (NEWS) for identification of at-risk/surveillance to reduce mortality                                                                                         | Residents                        | Descriptive data NEWS surveillance on reducing mortality. Time-series comparison with Office for National Statistics weekly reported registered deaths of care home residents and COVID-19 was the underlying cause of death, and all other deaths (excluding COVID-19) up to 10/05/2020.                                                                                                                                                             |

|                                     |                                                          |                        |                                    |                                                                                          |                                                              |                  |                                                                                                                                   |
|-------------------------------------|----------------------------------------------------------|------------------------|------------------------------------|------------------------------------------------------------------------------------------|--------------------------------------------------------------|------------------|-----------------------------------------------------------------------------------------------------------------------------------|
| Telford et al. (2020) <sup>35</sup> | USA State of Georgia (Fulton County and City of Atlanta) | Cross sectional cohort | Nursing homes                      | N=28 nursing homes. N=5671 participants; n=2868 (50.6%) residents, n=2803 (49.4%) staff. | Mass surveillance testing of staff and residents             | Residents, staff | COVID-19 prevalence, hospitalizations, and deaths.                                                                                |
| Unruh et al. (2020) <sup>36</sup>   | USA States New Jersey, New York, Connecticut             | Case study             | Nursing homes with $\geq 100$ beds | N=1162 nursing home facilities                                                           | Nursing home characteristics associated with mortality rates | Facilities       | Mortality data. Predicted probabilities with Logistic Regression, Independent variables compared on characteristics of facilities |

Study setting is presented as defined in original study. PPE, personal protective equipment; LTCF, long term care facilities; IQR, inter quartile range; NEWS, national early warning score.

Table 2. COVID-19 outcomes related to the nature of long term care facilities.

| Study                              | Facilities | Outcomes                                                                                                                                                                                                                                                                                                                                                                                                                                                                                                                                                                                                                               |
|------------------------------------|------------|----------------------------------------------------------------------------------------------------------------------------------------------------------------------------------------------------------------------------------------------------------------------------------------------------------------------------------------------------------------------------------------------------------------------------------------------------------------------------------------------------------------------------------------------------------------------------------------------------------------------------------------|
| Abrams et al. (2020) <sup>17</sup> | Facilities | <p>Average number of cases was 19.8 (range 1 to 256). New Jersey (88.6%, OR 7.16) and Massachusetts (78.0%, OR 4.36) had a higher number of affected facilities.</p> <p>Probability of having a COVID-19 case:<br/>           Facility size (relative to small): Large OR=6.52; Medium OR=2.63<br/>           Location (relative to rural): Urban OR=3.22<br/>           % African American residents (relative to low %): Greater % OR=2.05<br/>           Nursing home chain status (relative to non-chain status): Chain status OR=0.89<br/>           State were significantly related to the probability of having COVID case</p> |

|                                         |            |                                                                                                                                                                                                                                                                                                                                                                                                                                                                                                                                                                                                                                                                                                                                                   |
|-----------------------------------------|------------|---------------------------------------------------------------------------------------------------------------------------------------------------------------------------------------------------------------------------------------------------------------------------------------------------------------------------------------------------------------------------------------------------------------------------------------------------------------------------------------------------------------------------------------------------------------------------------------------------------------------------------------------------------------------------------------------------------------------------------------------------|
|                                         |            | <p>Outbreak size associations:<br/> Facility size (relative to small facility size): Large= -15.88; medium= -10.8 (percentage point change)<br/> For-profit status (relative to non-profit status) =1.88<br/> State.</p> <p>Medicaid dependency, ownership, five-star rating, and prior infection violation were not significantly related to COVID-19 cases.</p>                                                                                                                                                                                                                                                                                                                                                                                 |
| Brainard et al. (2020) <sup>37</sup>    | Facilities | <p>Risk of infection:<br/> Facility employee numbers (relative to &lt;10 workers): 11-20 non-care workers HR = 6.502 (95%CI 2.614 -16.17); 21-30 non-care workers HR = 9.870 (95% CI 3.224 -30.22); &gt;30 non-care workers HR = 18.927 (95% CI 2.358 -151.90).</p> <p>Predictors of spread and increase in cases per unit after 5th April risk increased 1.0347 (95% CI 1.02-1.05) p &lt; 0.001, reduced availability of PPE for eye protection increased risk 1.6571 (95% CI 1.29-2.13) p &lt; 0.001, PPE for facemasks 1.2602 (95% CI 1.09-1.46) p = 0.002, count of care workers employed 1.0379 (95% CI 1.02-1.05) p &lt; 0.001 count of nurses employed (in bands of 0-10,11-20, 21-30 and 31+) 1.1814 (95% CI 1.13-1.24) p &lt; 0.001.</p> |
| Brown et al. (2020) <sup>42</sup>       | Facilities | <p>Incidence in high crowding index homes was 9.7% versus 4.5% in low crowding index homes (p&lt;0.001), while COVID-19 mortality was 2.7% versus 1.3%. Likelihood of COVID-19 introduction did not differ (31.3% vs 30.2%, p=0.79). After adjustment for a regional nursing home, and resident covariates, the crowding index remained associated with increased risk of infection (RR=1.72, 95% CI: 1.11-2.65) and mortality (RR=1.72, 95% CI: 1.03-2.86). Simulations suggested that converting all 4-bed rooms to 2-bed rooms would have averted 988 (18.9%) infections of COVID-19 and 271 (18.7%) deaths.</p>                                                                                                                               |
| Burton et al. (2020) <sup>38</sup>      | Facilities | <p>Significant associations between the presence of an outbreak and number of beds (OR per 20-bed increase 3.50), a history of multiple previous outbreaks (OR 3.76), and regulatory risk assessment score (OR high-risk vs low 2.19). However, in the adjusted analysis, only number of beds (OR per 20-bed increase 3.50, 95%CI 2.06 to 5.94 per 20-bed increase).</p>                                                                                                                                                                                                                                                                                                                                                                          |
| Dutey-Magni et al. (2020) <sup>39</sup> | Facilities | <p>COVID-19 outbreak recorded in 121 of 179 facilities (67.6%). Large LTCF had greater rates of infection (aHR=1.8 [95% CI: 1.4-2.4] for LTCF with ≥70 beds versus &lt;35 beds. The adjusted hazard ratio for confirmed infection was 2.5 times [95% CI: 1.9-3.3] greater in LTCF with 0.85-1 resident per room versus LTCF with 0.7-0.85 resident per room. A ten-percentage point increase in the bed to staff ratio was associated with a 23% increase in infection (aHR=1.23 [95% CI: 1.17-1.31]).</p>                                                                                                                                                                                                                                        |
| Fisman et al. (2020) <sup>43</sup>      | Facilities | <p>Covid-19 cases higher in for-profit operators 165/361 (45.7%) compared to charitable 18/57 (31.6%).</p>                                                                                                                                                                                                                                                                                                                                                                                                                                                                                                                                                                                                                                        |
| Hand et al. (2018) <sup>24</sup>        | Facilities | <p>Residents noted to share rooms, walk throughout the facility and spent time in shared areas (e.g., gym, dining rooms, and recreational rooms). Because all case-patients had visited the gym at the facility for recreation or physical therapy before becoming ill, environmental cleaning of this area was performed.</p>                                                                                                                                                                                                                                                                                                                                                                                                                    |



|                                                                                  |                                                     |            |                                                                                                                                                                                                                                                                                                                                                                                                                                                                                                                                                                                                                                                                                                                                                                                                                                                                                                                                                                                                                                  |
|----------------------------------------------------------------------------------|-----------------------------------------------------|------------|----------------------------------------------------------------------------------------------------------------------------------------------------------------------------------------------------------------------------------------------------------------------------------------------------------------------------------------------------------------------------------------------------------------------------------------------------------------------------------------------------------------------------------------------------------------------------------------------------------------------------------------------------------------------------------------------------------------------------------------------------------------------------------------------------------------------------------------------------------------------------------------------------------------------------------------------------------------------------------------------------------------------------------|
| 1<br>2<br>3<br>4<br>5<br>6<br>7<br>8<br>9<br>10<br>11                            | Heung et al. (2006) <sup>47</sup>                   | Facilities | 67 of 90 residents participated. 26 of 32 staff participated. 2 residents and one staff member were positive during the outbreak. None of the remaining participants was positive for SARS-CoV antibodies. Residents were aged 65+ years, 79% were female, 93% were ambulant, 90% did activities with others, 79% went out.<br>Review of residents who died: Resident A transferred from the hospital and was chair bound and dependent with care needs. Resident B was chair bound and had not left home or had visitors. She was brought to a shared sitting room during mealtimes. This was only time residents A and B were located near each other. One resident shared a room with patient B and tested positive. Staff C was a domestic worker, and contact was via clinical waste in resident A room.<br>Low seroprevalence attributed to precautionary measures taken in the facility to reduce droplet and prevent contact transmission. Risks noted of SARS via fomites possible.                                     |
| 12<br>13<br>14<br>15                                                             | Ho et al. (2004) <sup>48</sup>                      | Facilities | 3 residents positive for SARS. 1 employee positive for SARS. 3 visitors positive for SARS. The index case was a single resident who was infected during a hospital stay, returned to the LTCF, and the virus spread to another 6 people. Transmission of the virus occurred due to lack of isolation rooms in nursing homes, lack of restricted movement of other patients and relatives, lack of infection control precautions, lack of knowledge among staff.                                                                                                                                                                                                                                                                                                                                                                                                                                                                                                                                                                  |
| 16<br>17<br>18<br>19                                                             | Iritani et al. (2020) <sup>52</sup>                 | Facilities | Larger cluster sizes in long term care hospitals/facilities were significantly positively associated with higher morbidity ( $\rho = 0.336$ , $P = 0.006$ ) and higher mortality ( $\rho = 0.317$ , $P = 0.009$ ).<br>Multivariate logistic regression showed larger cluster size (OR = 1.077, 95% CI: 1.017-1.145) and larger cluster number (OR = 2.019, 95% CI: 1.197-3.404) associated with mortality.                                                                                                                                                                                                                                                                                                                                                                                                                                                                                                                                                                                                                       |
| 20<br>21<br>22<br>23                                                             | Kennelly et al. (2020) <sup>51</sup>                | Facilities | Outbreak recorded in 75.0% (21/28) of facilities – four public and seventeen private. During the study period, 40.1% of residents in 21 nursing homes with outbreaks had a laboratory diagnosis of COVID-19. Correlation between the proportion of symptomatic staff and number of residents with confirmed/suspected COVID-19 ( $\rho=0.81$ ). No significant correlation between the proportion of asymptomatic staff and number of residents with confirmed/suspected COVID-19 ( $\rho=0.18$ $p=0.61$ ).                                                                                                                                                                                                                                                                                                                                                                                                                                                                                                                      |
| 24<br>25                                                                         | Kim (2020) <sup>53</sup>                            | Facilities | After the management of the outbreak, there were no more infected persons. All patients and employees tested negative 14 days from the start of quarantine.                                                                                                                                                                                                                                                                                                                                                                                                                                                                                                                                                                                                                                                                                                                                                                                                                                                                      |
| 26<br>27<br>28<br>29<br>30<br>31<br>32                                           | McMichael et al. (2020) a <sup>29</sup>             | Facilities | February 28, 2020, four cases COVID-19 identified in County. One person identified as index case from Facility A. Staff roles for confirmed cases reported: therapists, nurses, nurse assistants, health information manager, physician, and case manager. Paper reports that 30 facilities in County had confirmed cases and provides detail on first 9 (Facilities A to I).<br>Facility A shared staff with another facility and two resident transfers from facility A. Surveillance reported inadequate PPE, training, infection control practices, lack of documentation signs and symptoms, working in unfamiliar facilities or sharing staff.<br>On March 10, 2020, the governor of Washington implemented mandatory screening of health care workers and visitor restrictions for all licensed nursing homes and assisted living facilities including screening, testing, policies around visiting, excluding symptomatic staff, close monitoring of residents, testing, training and PPE. Monitoring of staff absences. |
| 33<br>34<br>35<br>36<br>37<br>38<br>39<br>40<br>41<br>42<br>43<br>44<br>45<br>46 | Office for National Statistics (2020) <sup>40</sup> | Facilities | For each additional member of infected staff working at the care home, the odds of resident infection increase by 11%, i.e. OR = 1.11 (95% CI: 1.1-1.11). Care homes using bank or agency nurses or carers most or every day more likely to have cases in residents (OR= 1.58, 95% CI: 1.5 - 1.65) compared to those who never use bank or agency staff. Residents in care homes outside of London had a lower chance of infection, except West Midlands (OR = 1.09, 95% CI: 1.0 - 1.17). Homes where staff receive sick pay are less likely to have resident cases (OR= 0.82 to 0.93, 95% CI: 7-18%), compared to homes where no sick leave. For each additional infected resident at a home, the odds of staff infection increase by 4% OR=1.04 (95% CI: 4 - 4%). Care homes using bank or agency staff most or every day OR=1.88 (95% CI: 1.77-2.0) compared to homes not using. Homes where staff regularly work elsewhere                                                                                                   |

|                                     |            |                                                                                                                                                                                                                                                                                                                                                                                                                                                                                                                                                                                                                                                                                                                                                                                                                                                                                                                                                                                                                                                                                                                                                                                                                                                                                                                                                                                           |
|-------------------------------------|------------|-------------------------------------------------------------------------------------------------------------------------------------------------------------------------------------------------------------------------------------------------------------------------------------------------------------------------------------------------------------------------------------------------------------------------------------------------------------------------------------------------------------------------------------------------------------------------------------------------------------------------------------------------------------------------------------------------------------------------------------------------------------------------------------------------------------------------------------------------------------------------------------------------------------------------------------------------------------------------------------------------------------------------------------------------------------------------------------------------------------------------------------------------------------------------------------------------------------------------------------------------------------------------------------------------------------------------------------------------------------------------------------------|
|                                     |            | (most or every day) increase odds (OR=2.4, 95% CI: 1.92 - 3.0) compared to homes who never work elsewhere. Staff at homes outside London had higher odds of COVID-19 infection.                                                                                                                                                                                                                                                                                                                                                                                                                                                                                                                                                                                                                                                                                                                                                                                                                                                                                                                                                                                                                                                                                                                                                                                                           |
| Patel et al. (2020) <sup>30</sup>   | Facilities | First resident unwell March 9, female aged in her 60s with cough and fever. Hospitalized March 11 and tested positive COVID-19 March 13. 14 residents who were positive developed symptoms over 30 day follow up. 21% (n=7) confirmed cases lived in single occupancy rooms. 55% (n=18) were in a double room with another confirmed case, and 24% (n=8) were in a double room with a resident who was negative March 15. Screening visitors and staff for symptoms, restricting visiting hours from March 6. No visitor access from March 12. Universal masking of all staff and residents from March 14. 15th -19th March on-site team implemented assessment of symptoms, resident cohorting. Staff testing positive isolated and return 7 days or after 72 hours of symptoms resolving. Education and training to staff in facility A infection control, PPE, vital signs                                                                                                                                                                                                                                                                                                                                                                                                                                                                                                             |
| Quigley et al. (2020) <sup>32</sup> | Facilities | For-profit = 67.86%, non-profit = 26.79% and government-owned = 5.36%. 37.5% were part of a chain. 54% have COVID-19 plans. All had staff training for COVID-19 and 100% processes to restrict/ limit visitors. 29% conducted COVID-19 simulation training. Communication with local Public Health - 96%, and 68% linked to local hospital referral. 66% reported access to COVID-19 tests - available for all residents and 53% of staff. 72% reported inadequate PPE supplies. 83% expected staff shortages. Solutions for staff included staff volunteer for more shifts (55%), non-clinical staff used (45%). 19% reported they would use agency staff.                                                                                                                                                                                                                                                                                                                                                                                                                                                                                                                                                                                                                                                                                                                               |
| Sacco et al. (2020) <sup>46</sup>   | Facilities | Restrictions on residents from March 16 - social distancing, remain in single rooms, no communal dining or group activities. No visitors since March 10, individual walks outside only in the presence of one staff member. Mail and packages stored 24 hours before being delivered to residents. Enhanced hygiene and cleaning. Staff had permanent face masks and additional hand hygiene                                                                                                                                                                                                                                                                                                                                                                                                                                                                                                                                                                                                                                                                                                                                                                                                                                                                                                                                                                                              |
| Sanchez et al. (2020) <sup>34</sup> | Facilities | Of the 12 facilities in the final survey, eight had implemented cohorting in a dedicated COVID-19 unit before 1st follow up. 4 remaining initiating cohorting after receiving results. 4 facilities did not assign dedicated personnel to care for residents with COVID-19 due to staff shortages. Final survey census 80 residents (range 36 to 147). 373 of 1063 (35%) had received positive results 1st follow up.                                                                                                                                                                                                                                                                                                                                                                                                                                                                                                                                                                                                                                                                                                                                                                                                                                                                                                                                                                     |
| Stall (2020) <sup>44</sup>          | Facilities | Adjusted modelling odds of COVID-19 outbreak associated with for-profit status aOR 1.01 (95% CI: 0.64-1.57), Municipal aOR 0.83 (95% CI: 0.45-1.54). Model 2 + Health Region aOR 2.02 (95% CI: 1.20-3.38) population <10,000 rural aOR 0.27 (95% CI: 0.13-0.58); and model 3 + home characteristics. Number of residents (unit of 50) aOR 1.38 (95% CI: 1.18-1.61), older design aOR 1.55 (95% CI: 1.01-2.38), chain ownership vs single home aOR 1.47 (95% CI: 0.86 to 2.51) and staff (full time equivalent/ bed ratio aOR 1.98 (95% CI: 0.39-9.97). The extent of a COVID-19 outbreak with profit aRR 1.83 (95% CI: 1.18-2.84) vs municipal aRR 0.60 (95% CI: 0.28 -1.30) compared with non-profit. Health Region aRR 1.65 (95% CI: 1.02- 2.67), older design standards aRR (95% CI: 1.27 -2.79), chain ownership aRR 1.84 (95% CI: 1.08-3.15) and staff/ bed ratio a RR 0.73 (95% CI: 0.10-5.35). Deaths accounted for 6.5% of all residents in for-profit homes vs 5.5 % in non-profit vs 1.7% municipal LTCF. For-profit associated with total COVID-19 deaths aRR 1.78, (95% CI: 1.03 - 2.07). Adjusted model increased risk of death with for-profit aRR 0.82, (95% CI: 0.44- 1.54), older design facilities aRR 2.08 (95% CI: 1.28-3.36) and chain ownership aRR 1.89, (95% CI: 1.00- 3.59). Number of active residents was protective aRR 0.81, (95% CI: 0.70 -0.95) / 50 beds. |
| Unruh et al. (2020) <sup>36</sup>   | Facilities | 184 nursing homes (15.8%) had 6 or more COVID-19 deaths. Deaths associated with Medicaid patients (quintile 5: 8.6 PP greater probability vs quintile 1). Patients with higher ADL scores (2.6 (95% CI: 1.4-3.8) PP, p<0.001), more total beds (0.1 (95% CI: 0.0 to 0.1) PP, p<0.001), higher occupancy (0.3 (95% CI: 0.1-0.5) PP, p<0.009), for-profit status (4.8 (95% CI: 0.8-8.8) PP, p=0.019). Comparing States: Higher mortality in those with Medicaid (quintile 5: 6.1 (95% CI: 0.0-12.1) PP, p=0.048). Not significant for                                                                                                                                                                                                                                                                                                                                                                                                                                                                                                                                                                                                                                                                                                                                                                                                                                                       |

|  |  |                                                                                                                                                |
|--|--|------------------------------------------------------------------------------------------------------------------------------------------------|
|  |  | other States. More direct care hours per patient day associated with lower COVID-19 deaths All States (-4.8 95% CI: -9.4 - -0.03) PP, p<0.04). |
|--|--|------------------------------------------------------------------------------------------------------------------------------------------------|

OR, odds ratio; HR, hazard ratio; PPE, personal protective equipment; CI, confidence interval; LTCF, long-term care facility; aHR, adjusted hazard ratio;

aRR, adjusted relative risk; ADL, activities of daily living; PP, percentage points.

For peer review only

### *Morbidity and mortality*

Morbidity and mortality results from included studies are presented for residents (Table 3a), staff (Table 3b), and visitors (Table 3c). Prevalence of COVID-19 infection was reported in 29 studies, including prevalence in residents (27 studies; <sup>18-30 33-35 39 40 42 44 46-51 54</sup>) and staff (22 studies; <sup>18 20-23 25 27-31 33 35 39 40 45-49 51 54</sup>), with 2 studies reporting absolute case numbers in visitors.<sup>29 48</sup> Prevalence rates ranged from 3.8% in a sample of 2074 LTCF<sup>49</sup> and 1.2% in the third point-prevalence survey at a single facility<sup>21</sup> to 85.4% in a single facility that implemented a telemedicine service to limit transmission.<sup>25</sup> Staff prevalence ranged from 0.6% in a point-prevalence survey in a single facility<sup>21</sup> to 62.6% in a group of nine LTCF.<sup>22</sup> One study reported 16 COVID-19 positive visitor cases,<sup>29</sup> while a study that examined SARS infection following an outbreak in a Hong Kong facility reported three positive visitor cases.<sup>48</sup>

The symptom status (symptomatic/presymptomatic/asymptomatic, typical/atypical symptoms) of participants was reported in 16 studies, with resident and staff symptom status reported in 15 <sup>18-20 22 23 26-28 30 33 34 46 49 51 54</sup> and 13 studies,<sup>20-23 27 28 30 33 45 46 49 51 54</sup> respectively. No studies reported symptom status of visitors. The proportion of COVID-19 positive residents presenting with symptoms ranged from 26.3%<sup>20 27</sup> to 59.8% (a sample of both residents and healthcare workers).<sup>28</sup> Asymptomatic cases in residents were reported in 13 studies,<sup>18 20 22 23 26-28 30 33 46 49 51 54</sup> with proportions of COVID-19 positive residents presenting with no symptoms varying from 2.4%<sup>46</sup> to 75.3%.<sup>49</sup> Among COVID-19 positive staff, the proportion of symptomatic cases ranged from 6.4%<sup>27</sup> to 100%,<sup>33</sup> and asymptomatic cases ranged from 23.6%<sup>51</sup> to 100%.<sup>21 23</sup>

Mortality results were reported in 22 studies, including information on mortality of residents (22 studies; <sup>18-20 23-25 28-30 34 35 38-44 46 48 50 51</sup>), staff (4 studies; <sup>29 35 46 48</sup>), and visitors (2 studies; <sup>29 48</sup>). Mortality rates in COVID-19 positive residents ranged from 5.3%<sup>20</sup> to 55.3%.<sup>39</sup> One study reported a 66.7% death rate in residents who tested positive for the SARS virus.<sup>48</sup> A study examining the mortality risk in Ontario LTCF reported a death rate of 0.1% across all residents.<sup>43</sup> Across the three studies which presented mortality results in COVID-19 positive staff, mortality rates were 0%.<sup>29 35 46</sup> One study presenting mortality rates in a nursing home following a SARS outbreak reported one death of a

1  
2  
3 member of staff.<sup>48</sup> Mortality rates reported in visitors in two studies was 0%<sup>48</sup> and 6.2%,<sup>29</sup>  
4  
5 respectively.  
6  
7

#### 8 *Characteristics of LTCFs on COVID-19 transmission*

9

10 Numerous facility-specific characteristics were linked with risk of COVID-19 cases (Table 2). These  
11 include size of LTCF,<sup>17 38 39 52</sup> staffing levels and/or use of agency care staff,<sup>29 32 37 39 40 44 51</sup> part of  
12  
13 larger chain of organisations and/or for profit status,<sup>17 32 36 43 44 51</sup> and related staffing, crowding, or  
14  
15 availability of single rooms.<sup>24 30 40 42 44 46-48</sup>  
16  
17  
18  
19  
20  
21  
22  
23  
24  
25  
26  
27  
28  
29  
30  
31  
32  
33  
34  
35  
36  
37  
38  
39  
40  
41  
42  
43  
44  
45  
46  
47  
48  
49  
50  
51  
52  
53  
54  
55  
56  
57  
58  
59  
60

Table 3a. Resident-specific outcomes of strategies implemented in nursing homes

| Study                                     | Interventions                                                                                                                                | Prevalence                                                                                                                                                                                      | Mortality                         | Other outcomes                                                                                                                                           |
|-------------------------------------------|----------------------------------------------------------------------------------------------------------------------------------------------|-------------------------------------------------------------------------------------------------------------------------------------------------------------------------------------------------|-----------------------------------|----------------------------------------------------------------------------------------------------------------------------------------------------------|
| Arons et al. (2020) <sup>18</sup>         | Mass testing (two point-prevalence surveys)<br>PPE                                                                                           | 48/76 (63%) across two surveys, 17/48 typical symptoms, 4/48 atypical symptoms, 3/48 asymptomatic, 24/48 presymptomatic<br><br>57/89 through point-prevalence, clinical evaluation, post-mortem | 15/57 (26%)                       | Common symptoms: fever (71%), cough (54%), malaise (42%)<br>Estimated doubling time: 3.4 days (95% CI: 2.5-5.3)                                          |
| Blackman et al. (2020) <sup>19</sup>      | PPE<br>Symptom screening<br>Visitor restrictions                                                                                             | 12 positive cases, 2 awaiting results, 47 symptomatic residents                                                                                                                                 | 3 COVID-19 related deaths         |                                                                                                                                                          |
| Borras-Bermejo et al (2020) <sup>54</sup> | Mass testing<br>Visitor restrictions                                                                                                         | 768/3214 (23.9%), 486 (69.5% of those with symptom information) were asymptomatic                                                                                                               |                                   | 2624 of all residents reported symptoms in the previous 14 days                                                                                          |
| Brown et al. (2020) <sup>42</sup>         | Facility characteristics                                                                                                                     | 5218/78607 (6.6%)                                                                                                                                                                               | 1452/5218 (27.8%)                 |                                                                                                                                                          |
| Burton et al. (2020) <sup>38</sup>        | Facility characteristics                                                                                                                     |                                                                                                                                                                                                 | 403 deaths recorded in care homes | 472 excess deaths in care homes with an outbreak (399 COVID-19 related)                                                                                  |
| Dora et al. (2020) <sup>20</sup>          | Mass testing (three point-prevalence surveys)<br>Symptom screening<br>Visitor restrictions<br>Hand hygiene, contact precautions<br>Cohorting | 19/96 (19.8%) across three surveys, 5/19 symptomatic, 8/19 presymptomatic, 6/19 asymptomatic                                                                                                    | 1/19 (5.3%)                       | Symptoms: fever (58%), myalgia (58%), cough (47%), dyspnoea (32%), nausea (32%)<br>Oxygen therapy required for 4/8 presymptomatic, 4/5 symptomatic cases |
| Dutey-Magni et al. (2020) <sup>39</sup>   | Mass testing                                                                                                                                 | 951/9339 (10.2%)                                                                                                                                                                                | 526/951 (55.3%)                   | 2075/9339 (22.2%) experienced infection symptoms                                                                                                         |
| Eckardt et al. (2020) <sup>21</sup>       | Mass testing (three point-prevalence surveys)<br>PPE<br>Symptom screening<br>Visitor restrictions<br>Cohorting                               | Survey 1: 5/105 (4.8%)<br>Survey 2: 4/86 (4.7%)<br>Survey 3: 1/85 (1.2%)                                                                                                                        |                                   |                                                                                                                                                          |
| Feaster & Goh (2020) <sup>22</sup>        | Mass testing                                                                                                                                 | 408/582 (49.5%), 202/408 (49.5%) symptomatic                                                                                                                                                    |                                   |                                                                                                                                                          |

|                                    |                                                          |                                                                                                                                                       |                 |                                                                                                                                                                                                                                                                                                                                                                                                                              |
|------------------------------------|----------------------------------------------------------|-------------------------------------------------------------------------------------------------------------------------------------------------------|-----------------|------------------------------------------------------------------------------------------------------------------------------------------------------------------------------------------------------------------------------------------------------------------------------------------------------------------------------------------------------------------------------------------------------------------------------|
|                                    |                                                          | 237/332 (71.4%) female residents positive, 121/237 (51.1%) asymptomatic<br>171/250 (68.4%) male residents positive, 81/171 (47.4%) asymptomatic       |                 |                                                                                                                                                                                                                                                                                                                                                                                                                              |
| Fisman et al. (2020) <sup>43</sup> | Facility characteristics                                 |                                                                                                                                                       | 83/79498 (0.1%) | IRR (COVID-19 related death in LTCF residents) = 13.1 (95% CI: 9.9-17.3) compared with community-living adults older than 69 years                                                                                                                                                                                                                                                                                           |
| Graham et al (2020) <sup>23</sup>  | Mass testing (two point-prevalence surveys)<br>Cohorting | Survey 1: 126/313 (40%), 72/126 (57.1%) symptomatic, 50 typical symptoms, 22 atypical symptoms, 54/126 (42.9%) asymptomatic<br>Survey 2: 5/176 (2.8%) | 53/131 (40.4%)  | Increased risk of death: men (48% of deaths vs. 34% in those who survived; whole group 38% male, p=0.02); the trend for median age to be greater among those who died (p = 0.058)<br>Increased odds of COVID-19 positive: new onset anorexia (OR = 3.74, 95% CI: 1.5-9.8); cough and/or shortness of breath (OR = 3.72, 95% CI: 1.8-7.8); fever, altered mental state/behaviour, diarrhoea not associated with positive test |
| Hand et al. (2018) <sup>24</sup>   | Symptom screening<br>Hand hygiene, contact precautions   | 20/130 residents suspected cases, 13/20 tested 7/13 (54%) tested positive; 6/7 required hospitalization                                               | 3/7 (42.9%)     | No new cases identified after November 18 2017                                                                                                                                                                                                                                                                                                                                                                               |
| Harris et al. (2020) <sup>25</sup> | Facility characteristics                                 | 41/48 (85.4%)<br>18/48 residents hospitalised, 11/18 returned to facility from hospital                                                               | 6/48 (12.5%)    | 13/48 (27.1%) of residents received telemedicine consultations                                                                                                                                                                                                                                                                                                                                                               |
| Heung et al. (2006) <sup>47</sup>  | Hand hygiene, contact precautions                        | 2 residents were positive during the outbreak, 0/67 residents positive for SARS-CoV antibodies upon screening                                         |                 | 2/67 reported symptoms                                                                                                                                                                                                                                                                                                                                                                                                       |
| Ho et al. (2004) <sup>48</sup>     | PPE<br>Cohorting                                         | 3 residents positive                                                                                                                                  | 2/3 (66.7%)     |                                                                                                                                                                                                                                                                                                                                                                                                                              |
| Hoxha et al. (2020) <sup>49</sup>  | Mass testing                                             | 5390/142100 (3.8%), 4059/5390 (75.3%) asymptomatic                                                                                                    |                 | Infection odds: Women compared to men OR = 1.2 (95% CI: 1.1-1.2); symptomatic compared to                                                                                                                                                                                                                                                                                                                                    |



|                                                     |                                                                                                                                                     |                                                                                                                                                                                                                           |                                          |                                                                                                                                                                          |
|-----------------------------------------------------|-----------------------------------------------------------------------------------------------------------------------------------------------------|---------------------------------------------------------------------------------------------------------------------------------------------------------------------------------------------------------------------------|------------------------------------------|--------------------------------------------------------------------------------------------------------------------------------------------------------------------------|
|                                                     |                                                                                                                                                     |                                                                                                                                                                                                                           |                                          | asymptomatic OR = 8.5 (95% CI: 8.0-9.0)                                                                                                                                  |
| Kennelly et al. (2020) <sup>51</sup>                | Mass testing<br>Facility characteristics                                                                                                            | 710/1741 (40.1%), 54/1741 (3.1%) residents were suspected COVID-19, 193/710 (27.2%) asymptomatic, 396/710 (55.8%) had recovered by the completion of surveillance period                                                  | 183/710 (25.8%)                          | Non-COVID-19 mortality rate similar between outbreak and non-outbreak NHS (5.1% vs. 4%, p=0.4)                                                                           |
| Kimball et al. (2020) <sup>32</sup>                 | Mass testing (three point-prevalence surveys)<br>PPE<br>Symptom screening<br>Visitor restrictions<br>Hand hygiene, contact precautions<br>Cohorting | 23/76 (30.3%), 10/23 symptomatic (8/10 typical symptoms, 2/10 atypical symptoms), 3/23 asymptomatic, 10/23 presymptomatic                                                                                                 |                                          | Symptoms: fever (61.5%), malaise (46.2%), cough (38.5), Presymptomatic mean interval from testing to symptom onset was 3 days                                            |
| Klein et al. (2020) <sup>50</sup>                   | Mass testing<br>PPE<br>Visitor restrictions<br>Cohorting                                                                                            | 39/60 (65%)                                                                                                                                                                                                               | 8/39 (20.5%)                             | Symptoms: exhaustion, loss of appetite, dysphagia, fever, cough, colds, diarrhoea                                                                                        |
| Lennon et al. (2020) <sup>27</sup>                  | Mass testing                                                                                                                                        | 2654/16966 (15.5%), 1692/2654 (63.8%) asymptomatic, 699/2654 (26.3%) symptomatic, (263/2654 symptom data missing)                                                                                                         |                                          |                                                                                                                                                                          |
| Louie et al. (2020) <sup>28</sup>                   | Mass testing<br>Symptom screening<br>Visitor restrictions                                                                                           | 214/431 (49.7%) residents and healthcare workers, 128/214 (59.8%) symptomatic (78/128 were residents), 86/214 (40.2%) asymptomatic<br>Additional 156 asymptomatic residents subsequently tested: 63/156 COVID-19 positive | 12/78 (15.4%) symptomatic residents died | 22/78 (28.2%) symptomatic residents hospitalized                                                                                                                         |
| McMichael et al. (2020) <sup>a29</sup>              | Mass testing<br>PPE<br>Cohorting                                                                                                                    | 101/118 (84.7%)                                                                                                                                                                                                           | 34/101 (33.7%)                           | 55/101 (54.5%) hospitalized; (37/101 no data on hospitalisation status)                                                                                                  |
| Office for National Statistics (2020) <sup>40</sup> | Mass testing<br>Facility characteristics                                                                                                            | 19.9% (95% CI: 18.5-21.3) in homes with a confirmed outbreak<br>10.7% (95% CI: 10.1-11.3) in all homes                                                                                                                    | 15606 across all homes                   | Odds of resident infection: Each additional infected staff member at a home OR = 1.11 (95% CI: 1.0-1.17)<br>Homes using bank or agency nurses most or all days OR = 1.58 |



|                                    |                                                                                                             |                                                                                                                                                                              |                                                                                                                           |                                                                                                                                                                                                                                                 |
|------------------------------------|-------------------------------------------------------------------------------------------------------------|------------------------------------------------------------------------------------------------------------------------------------------------------------------------------|---------------------------------------------------------------------------------------------------------------------------|-------------------------------------------------------------------------------------------------------------------------------------------------------------------------------------------------------------------------------------------------|
|                                    |                                                                                                             |                                                                                                                                                                              |                                                                                                                           | (95% CI: 1.5-1.65) compared with homes never using these staff<br>Homes outside of London had lower infection chance, except West Midlands (OR = 1.09, 95% CI: 1.0-1.17)<br>Homes where staff receive sick pay OR = 0.82-0.93 (95% CI: unknown) |
| Patel et al. (2020) <sup>30</sup>  | Mass testing<br>Symptom screening<br>Visitor restrictions<br>Cohorting                                      | 33/118 (28.0%), 19/33 (58%) symptomatic (8 typical symptoms, 4 atypical symptoms, 10 both typical and atypical symptoms); 1/33 (3%) presymptomatic, 13/33 (39%) asymptomatic | 10/35 (28.6%) (5/10 symptomatic)<br>30-day survival = 71% (95% CI 52-83)                                                  | 1/91 negative residents reported symptoms<br>35/90 negative asymptomatic residents developed symptoms during 30-day surveillance, 2/35 COVID-19 positive upon re-testing<br>13/35 COVID-19 residents hospitalized                               |
| Roxby et al. (2020) <sup>33</sup>  | Mass testing<br>Symptom screening<br>Visitor restrictions<br>Hand hygiene, contact precautions<br>Cohorting | Survey 1: 3/80 (3.8%), 1/3 reported resolved cough and loose stool during the preceding 14 days<br>Survey 2: 1/77 (1.3%)                                                     |                                                                                                                           | All residents clinically stable 14 days after second test<br>21 days after the test, all cases continued their usual state of health                                                                                                            |
| Sacco et al. (2020) <sup>46</sup>  | Mass testing<br>PPE<br>Visitor restrictions<br>Hand hygiene, contact precautions<br>Cohorting               | 41/87 (47.1%)<br>3/41 asymptomatic                                                                                                                                           | 11/41 (27%)<br>All-cause mortality: 13% (95% CI 7.2-21.2), compared to 3% for the same period during the previous 5 years | 287/2773 (24%)                                                                                                                                                                                                                                  |
| Sanchez et al (2020) <sup>34</sup> | Mass testing (two point-prevalence surveys)<br>Cohorting                                                    | Survey 1: 716/2218 (32.3%), 344/716 (48%) symptomatic<br>Survey 2: 115/637 (18.1%), 5/115 (4%) symptomatic<br>Total surveillance period: 1207/2773 (44%)                     |                                                                                                                           | 446/2773 (37%) hospitalised                                                                                                                                                                                                                     |
| Stall et al. (2020) <sup>44</sup>  | Facility characteristics                                                                                    | 5218/75676 (6.9%)<br>3599/5218 (69.0%) for-profit home residents                                                                                                             | 1452/5218 (27.8%)                                                                                                         |                                                                                                                                                                                                                                                 |

|                                    |                                                                                   |                                                                                                          |                                                                                                       |                                                                                                                                                                                                                                                                                                                                        |
|------------------------------------|-----------------------------------------------------------------------------------|----------------------------------------------------------------------------------------------------------|-------------------------------------------------------------------------------------------------------|----------------------------------------------------------------------------------------------------------------------------------------------------------------------------------------------------------------------------------------------------------------------------------------------------------------------------------------|
|                                    |                                                                                   | 1239/5218 (23.7%) non-profit home residents<br>380/5218 (7.3%) municipal home residents                  | 989/3599 (27.5%) for-profit home<br>368/1239 (29.7%) non-profit home<br>95/380 (25.0%) municipal home |                                                                                                                                                                                                                                                                                                                                        |
| Stow et al. (2020) <sup>41</sup>   | Facility characteristics                                                          |                                                                                                          | 1532 COVID-19 related deaths                                                                          | Highest correlation of increased NEWS and deaths observed for a two-week lag ( $r=0.82$ , $p<0.05$ )<br>Above baseline measures of high respiratory rate ( $r=0.73$ , $p<0.05$ for a two-week lag) and low oxygen saturation ( $r=0.8$ , $p<0.05$ for a two-week lag) appear to follow the pattern of COVID-19 and non-COVID-19 deaths |
| Telford et al (2020) <sup>35</sup> | Mass testing (15 facilities in response to outbreak, 13 facilities as prevention) | 821/2868 (28.6%)<br>Response group: 804/1703 (47.2%)<br>Preventive group: 17/1133 (1.5%), ( $p<0.0001$ ) | Response group: 131/804 (16.3%)<br>Preventive group: 3/17 (17.6%)                                     | Response group: 171/804 (21.3%) residents hospitalised<br>Preventive group: 5/17 (29.4%) residents hospitalised                                                                                                                                                                                                                        |

PPE, personal protective equipment; CI, confidence interval; IRR, incidence risk ratio; LTCF, long-term care facility; OR, odds ratio; NEWS, national early warning score.

Table 3b. Staff-specific outcomes of strategies to reduce transmission

| Study                                     | Interventions                                    | Prevalence                                                                                                               | Mortality | Other outcomes                                                                          |
|-------------------------------------------|--------------------------------------------------|--------------------------------------------------------------------------------------------------------------------------|-----------|-----------------------------------------------------------------------------------------|
| Arons et al. (2020) <sup>18</sup>         | Mass testing<br>PPE                              | 26/51 (51.0%)<br>17/26 (65%) were nursing staff, 9/26 (35%) had roles that provided care/therapies across multiple units |           | 0/26 hospitalized                                                                       |
| Blackman et al. (2020) <sup>19</sup>      | PPE<br>Symptom screening<br>Visitor restrictions |                                                                                                                          |           | 26 staff members absent from work due to sickness                                       |
| Borras-Bermejo et al (2020) <sup>54</sup> | Mass testing<br>Visitor restrictions             | 403/2655 (15.2%), 144/403 (35.7%) asymptomatic                                                                           |           | 1772/2665 (66.7%) staff reported fever or respiratory symptoms in the preceding 14 days |

|                                         |                                                                                                                                              |                                                                                                                                                          |  |                                                                                                                                                                                                                                                                                 |
|-----------------------------------------|----------------------------------------------------------------------------------------------------------------------------------------------|----------------------------------------------------------------------------------------------------------------------------------------------------------|--|---------------------------------------------------------------------------------------------------------------------------------------------------------------------------------------------------------------------------------------------------------------------------------|
| Dora et al. (2020) <sup>20</sup>        | Mass testing (three point-prevalence surveys)<br>Symptom screening<br>Visitor restrictions<br>Hand hygiene, contact precautions<br>Cohorting | 8/136 (6%)<br>4/8 (50%) asymptomatic<br>3/8 nursing staff<br>5/8 licensed vocational nurses                                                              |  |                                                                                                                                                                                                                                                                                 |
| Dutey-Magni et al. (2020) <sup>39</sup> | Mass testing                                                                                                                                 | 585/11604 (5.0%)                                                                                                                                         |  | 1892/11604 (16.3%) reported symptoms                                                                                                                                                                                                                                            |
| Eckardt et al. (2020) <sup>21</sup>     | Mass testing (three point-prevalence surveys)<br>PPE<br>Symptom screening<br>Visitor restrictions<br>Cohorting                               | Survey 1: 10/176 (5.7%), 10/10 (100%) asymptomatic<br>Survey 2: 5/175 (2.9%), 5/5 (100%) asymptomatic<br>Survey 3: 1/173 (0.6%), 1/1 (100%) asymptomatic |  |                                                                                                                                                                                                                                                                                 |
| Feaster & Goh (2020) <sup>22</sup>      | Mass testing                                                                                                                                 | 223/356 (62.6%), 55/223 (24.7%) asymptomatic                                                                                                             |  | Infection prevalence higher in staff with direct resident contact (150/219, 68.5%) compared with staff with no direct resident contact (25/52, 48.1%)                                                                                                                           |
| Fisman et al. (2020) <sup>43</sup>      | Facility characteristics                                                                                                                     |                                                                                                                                                          |  | Infection among LTCF staff was associated with death among residents with a 6-day lag (adjusted IRR for death per infected staff member, 1.17; 95% CI: 1.11-1.26) and a 2-day lag (relative increase in risk of death per staff member with infection, 1.20; 95% CI: 1.14-1.26) |
| Graham et al. (2020) <sup>23</sup>      | Mass testing (two point-prevalence surveys)<br>Cohorting                                                                                     | 3/70 (4.3%)<br>3/3 (100%) asymptomatic                                                                                                                   |  | Staff absence due to sickness/self-isolation between March 1 and May 1 elevated relative to background level (215.9% increase, 95% CI: 80-352)                                                                                                                                  |
| Guery et al. (2020) <sup>45</sup>       | Mass testing                                                                                                                                 | 3/136 (2.2%)<br>1/3 (33.3%) asymptomatic                                                                                                                 |  |                                                                                                                                                                                                                                                                                 |

|                                                     |                                                           |                                                                                                                                                                                                                        |            |                                                                                                                                                                                    |
|-----------------------------------------------------|-----------------------------------------------------------|------------------------------------------------------------------------------------------------------------------------------------------------------------------------------------------------------------------------|------------|------------------------------------------------------------------------------------------------------------------------------------------------------------------------------------|
|                                                     |                                                           | 1/3 (33.3%) presymptomatic<br>1/3 (33.3%) symptomatic                                                                                                                                                                  |            |                                                                                                                                                                                    |
| Harris et al. (2020) <sup>26</sup>                  | Facility characteristics                                  | 7 staff COVID-19 positive prior to intervention<br>0 further staff positive after intervention implemented                                                                                                             |            |                                                                                                                                                                                    |
| Heung et al. (2006) <sup>47</sup>                   | Hand hygiene, contact precautions                         | 1 staff member SARS-CoV positive during outbreak (a domestic worker)<br>0/26 staff positive for SARS-CoV antibodies                                                                                                    |            |                                                                                                                                                                                    |
| Ho et al. (2004) <sup>48</sup>                      | PPE<br>Cohorting                                          | 1 staff member SARS positive                                                                                                                                                                                           | 1/1 (100%) |                                                                                                                                                                                    |
| Hoxha et al. (2020) <sup>49</sup>                   | Mass testing                                              | 2953/138327 (2.1%)<br>2185/2953 (74.0%) asymptomatic                                                                                                                                                                   |            |                                                                                                                                                                                    |
| Kennelly et al. (2020) <sup>51</sup>                | Mass testing<br>Facility characteristics                  | 675 staff COVID-19 positive<br>159/675 (23.6%) asymptomatic                                                                                                                                                            |            | Proportion of symptomatic staff correlated with number of residents with confirmed/suspected COVID-19, $\rho = 0.81$ ( $p < 0.001$ )                                               |
| Lennon et al. (2020) <sup>27</sup>                  | Mass testing                                              | 624/15514 (4.1%)<br>487/624 (78.0%) asymptomatic<br>40/624 (6.4%) symptomatic                                                                                                                                          |            |                                                                                                                                                                                    |
| Louie et al. (2020) <sup>28</sup>                   | Mass testing<br>Symptom screening<br>Visitor restrictions | 214/431 (49.7%) residents and staff COVID-19 positive<br>86/214 asymptomatic<br>128/214 symptomatic (50/128 were health care workers)<br>Additional asymptomatic staff testing: 23/147 (15.6%) staff COVID-19 positive |            | 0/50 symptomatic health care workers hospitalized                                                                                                                                  |
| McMichael et al. (2020) <sup>a29</sup>              | Mass testing<br>PPE<br>Cohorting                          | 50 staff COVID-19 positive                                                                                                                                                                                             | 0/50 (0%)  | 3/50 (6%) hospitalised<br>Staff roles for confirmed cases: therapists, nurses, nurse assistants, health information manager, physician, case manager                               |
| Office for National Statistics (2020) <sup>40</sup> | Mass testing<br>Facility characteristics                  | Estimated 6.9% (95% CI 5.9-7.9%) staff COVID-19 positive across homes that reported an outbreak                                                                                                                        |            | Odds of staff infection: for each additional infected resident, staff infection OR = 1.04 (95% CI: 1.04-1.04)<br>Care homes using bank or agency staff most or every day OR = 1.88 |

|                                    |                                                                                                             |                                                                                                                                                                                                                                                                                                                                                                                                                                                                                                     |           |                                                                                                                                                                                                                                                                             |
|------------------------------------|-------------------------------------------------------------------------------------------------------------|-----------------------------------------------------------------------------------------------------------------------------------------------------------------------------------------------------------------------------------------------------------------------------------------------------------------------------------------------------------------------------------------------------------------------------------------------------------------------------------------------------|-----------|-----------------------------------------------------------------------------------------------------------------------------------------------------------------------------------------------------------------------------------------------------------------------------|
|                                    |                                                                                                             |                                                                                                                                                                                                                                                                                                                                                                                                                                                                                                     |           | (95% CI: 1.77-2.0) compared to homes not using these staff<br>Homes where staff work in other homes most or every day OR = 2.4 (95% CI: 1.92-3.0) compared to homes where staff never work elsewhere<br>Staff at homes outside London had higher odds of COVID-19 infection |
| Patel et al. (2020) <sup>30</sup>  | Mass testing<br>Symptom screening<br>Visitor restrictions<br>Cohorting                                      | 19/42 (45.2%)<br>11/19 symptomatic (57.9%)<br>8/19 (42.1%) asymptomatic                                                                                                                                                                                                                                                                                                                                                                                                                             |           |                                                                                                                                                                                                                                                                             |
| Quicke et al. (2020) <sup>31</sup> | Mass testing (five point-prevalence surveys)                                                                | Site A: all staff uninfected<br>Site B: low prevalence in week 1, weeks 2-5 no infections detected, week 6 increase in cases<br>Site C: initial infection prevalence was lower (6.9%), and the incidence declined to zero by week 3<br>Site D: 22.5% of workers at site D had prevalent infections at the start of the study and incidence was high initially (12.2 per 100 workers per week), declining over time<br>Site E: low prevalence in week 1 saw an increase in cases in subsequent weeks |           |                                                                                                                                                                                                                                                                             |
| Roxby et al. (2020) <sup>33</sup>  | Mass testing<br>Symptom screening<br>Visitor restrictions<br>Hand hygiene, contact precautions<br>Cohorting | 2/62 (3.2%) (1 worked in dining facilities, 1 was a health aide)<br>2/2 (100%) symptomatic                                                                                                                                                                                                                                                                                                                                                                                                          |           |                                                                                                                                                                                                                                                                             |
| Sacco et al (2020) <sup>46</sup>   | Mass testing<br>PPE<br>Visitor restrictions<br>Hand hygiene, contact precautions<br>Cohorting               | 22 staff COVID-19 positive<br>9/22 (40.1%) asymptomatic                                                                                                                                                                                                                                                                                                                                                                                                                                             | 0/22 (0%) | Staff incidence: Care givers = 0.48/100 person-days<br>Non-care givers with resident contact = 0.36/100 person-days<br>Non-care givers with no resident contact = 0.04/100 person-days                                                                                      |

|                                    |                                                                                   |                                                                                                                                                                  |                                                                             |                                                                                                                                                                              |
|------------------------------------|-----------------------------------------------------------------------------------|------------------------------------------------------------------------------------------------------------------------------------------------------------------|-----------------------------------------------------------------------------|------------------------------------------------------------------------------------------------------------------------------------------------------------------------------|
| Stall (2020) <sup>44</sup>         | Facility characteristics                                                          |                                                                                                                                                                  |                                                                             | Outbreak involving staff and residents' for-profit homes 59/360 and staff only 44/360<br>Non-profit homes staff only 18/162.<br>Municipal homes = outbreak staff only 16/101 |
| Telford et al (2020) <sup>35</sup> | Mass testing (15 facilities in response to outbreak, 13 facilities as prevention) | 264/2803 (9.4%)<br>Response group: 249/264 (94.3%)<br>Preventive group: 15/264 (5.7%) (d)<br>Prevalence: Response group 12.8% vs Preventive group 1.7%, p<0.0001 | 1/264 (0.4%)<br>Response group: 0/249 (0%)<br>Preventive group: 1/15 (6.7%) | 16/264 (6.1%) hospitalised<br>Response group: 15/249 (6.0%) hospitalised<br>Preventive group: 1/15 (6.7%) hospitalised 15/249                                                |

LTCF, long-term care facility; IRR, incidence risk ratio; CI, confidence interval.

Table 3c. Visitor-specific outcomes following the implementation of strategies

| Study                                 | Interventions                    | Prevalence                    | Mortality   | Other outcomes                                                                                                                                                                                 |
|---------------------------------------|----------------------------------|-------------------------------|-------------|------------------------------------------------------------------------------------------------------------------------------------------------------------------------------------------------|
| Ho et al. (2004) <sup>48</sup>        | PPE<br>Cohorting                 | 3 visitors SARS positive      | 0/3 (0%)    |                                                                                                                                                                                                |
| McMichael et al (2020) <sup>a29</sup> | Mass testing<br>PPE<br>Cohorting | 16 visitors COVID-19 positive | 1/16 (6.2%) | 8/16 (50%) hospitalized<br>Underlying conditions:<br>hypertension (2/8, 12.5%); cardiac disease (3/8, 18.8%); renal disease (2/8, 12.5%); obesity (3/8, 18.8%), pulmonary disease (2/8, 12.5%) |

PPE, personal protective equipment

### *Quality review*

The quality ratings of included studies are presented in Supplementary Table 2. Overall quality of evidence in this review is considered low based on MMAT assessment criteria.

### **Discussion**

Evidence in this review indicates the impact of COVID-19 on LTCF, demonstrating the vulnerability of this setting in 11 countries. A novel outcome highlights the characteristics of LTCF associated with COVID-19 outbreaks, in addition to reporting the prevalence rates of COVID-19 and associated mortality and morbidity for residents, staff, and visitors. A variety of measures were implemented in LTCF, of which many were instigated locally by facility managers, and others through agile public health policy. Mass testing of residents with or without staff testing was the primary measure used to reduce transmission of COVID-19. This provides objective evidence of infection rates in facilities, and enables application of subsequent measures, including isolation of residents who are infected with re-designation of specific staff to care for them. Repeated point-prevalence testing allows facilities to grasp the spread of the virus along with the impact of their mitigation strategies.

Further measures implemented in facilities echoed public health recommendations to the broader community to limit the spread of the virus. These included guidance on hand hygiene, contact and droplet precautions, and restricting staff, including agency workers, to working in only one facility.<sup>55</sup> Restricting visitor access to facilities was implemented generally to reduce the likelihood of introducing COVID-19 into LTCF, assessing body temperature and symptom screening of staff and visitors on entry.

The prevalence of COVID-19 infection varied throughout included studies, with no distinct pattern emerging between prevention strategies and infection prevalence. Similarly, the mortality rate varied widely among studies and prevention measures. However, patterns emerged regarding associations between facility characteristics and the risk of a COVID-19 outbreak and spread. Sepulveda (2020) reports the disproportionately higher risk of contracting COVID-19 for residents of LTCF, calculating a 12-country average mortality rate of 2772 per 100, 000 LTCF residents compared to 122 per 100,

1  
2  
3 000 for community dwelling older persons.<sup>56</sup> This represented an average 24.2 fold higher rate of  
4 death (range 14.2 (Germany) to 73.7 (Canada)). Higher LTCF mortality rates in Canada (78.4%  
5 compared to the OECD 12 country average of 43.7%) are explained by poorer services in care  
6 facilities and includes limited staffing and funding.<sup>56</sup>  
7  
8  
9  
10

11  
12 Evidence identified the facility size/number of beds was significantly associated with the probability  
13 of having a COVID-19 case, and the resulting size of an outbreak. For example, in a sample of 30 US  
14 nursing homes, the probability of having a COVID -19 case was increased in medium and large  
15 facilities compared with small facilities,<sup>17</sup> while in 121 UK homes reporting an outbreak, facilities  
16 with  $\geq 70$  beds had 80% greater infection rates than facilities with  $< 35$  beds.<sup>39</sup> A sample of 623  
17 Canadian nursing homes demonstrated facilities with a high crowding index had more infections and  
18 deaths than those with a low crowding index. Simulations conducted suggested nearly 20% of  
19 infections and deaths may have been averted by converting all 4-bed rooms into 2-bed rooms.<sup>42</sup>  
20 Similarly, facilities with a greater number of employees, staff who work in multiple facilities, and an  
21 increased number of infected staff, were also more likely to experience a COVID -19 outbreak.<sup>37 40 51</sup>  
22 However, facilities where staff receive sick leave were shown to be less likely to have positive  
23 cases.<sup>40</sup> Reduced availability of PPE predicted the spread and increase in case number in facilities,<sup>37</sup>  
24 while for-profit status of facilities was commonly identified as increasing the odds of case outbreaks  
25 relative to non-profit status.<sup>17 32 36 43 44</sup>  
26  
27  
28  
29  
30  
31  
32  
33  
34  
35  
36  
37  
38  
39  
40  
41

42 Rapid development of COVID-19 vaccines was recognised in early March 2020.<sup>57</sup> Lurie et al. (2020)  
43 note previous success in the development of H1N1 vaccination, and similarly the challenges for  
44 SARS, Ebola, and Zika vaccines.<sup>57</sup> The speed of developments is acknowledged, and Public Health  
45 England (2021) report that at the end of February 2021 up to 5900 deaths were averted in people aged  
46 80 years and older, with over 200 deaths prevented in those aged 7- to 79 years.<sup>58</sup> Montano (2021)  
47 advises that an accelerated pace of vaccine developments may not lead to total eradication of the  
48 virus, citing smallpox as the only virus that has been eliminated worldwide.<sup>59</sup> Given this, the  
49 transmission reduction measures highlighted in the present review are of crucial importance for the  
50 continued management of COVID-19 in LTCF.  
51  
52  
53  
54  
55  
56  
57  
58  
59  
60



### *Quality review*

The quality of evidence in this review is technically low, primarily reported from observational studies, expert opinion, reporting of outbreaks and describing the process and management (Supplementary Table 2). Factors associated with lower quality of evidence include the reliance on self-reporting of symptoms, recall bias, use of datasets which may be incomplete, and use of convenience sampling. However, confirmation of COVID-19 in the majority of studies was via laboratory testing. We did not remove any study following our review of quality and the evidence is consistent with real-time reporting of data to learn from outbreaks. Papers included from MEDRXIV pre publishing repository are acknowledged; however, as papers were subsequently published in peer review journals we reviewed accordingly. The Institute of Medicine (2004)<sup>60</sup> advocates for early detection of epidemics, effective communication to the public, and promotion of research and development for strategic planning.

### *Limitations in the review process*

A key strength of this review is that it addresses a knowledge gap and has collated evidence from a broad methodological base to report the measures to reduce transmission of COVID-19 in LTFC and reports characteristics of facilities. Due to the heterogeneity of included studies, meta-analysis was not performed, while the descriptive nature of studies prevents identification of a causative relationship between measures and outcomes. We acknowledge that while a summary of facility characteristics and COVID-19 outcomes are presented, data do not allow for presentation of specific measures. Despite this, the systematic approach to this review has identified the scope of interventions implemented in LTFC to reduce COVID -19 transmission.

Publication bias was minimized with inclusion of pre-published evidence, follow up contacts with authors for early reporting, and through the inclusion of observational study designs. Most studies reported are in English, we translated papers from German and Spanish as part of the assessment and review. Outbreak reports include convenience samples or smaller cohorts of residents in LTFC with

1  
2  
3 limited data reported in brief reports and letters. However, real-time reporting of outbreaks provides  
4 immediate evidence and shared understanding advocated by the Institute of Medicine.<sup>60</sup>  
5  
6

7  
8 Evidence in this review builds on publications from Salcher-Konrad, et al.<sup>61</sup>, a report from WHO,<sup>62</sup>  
9  
10 and an Irish Expert Panel review,<sup>55</sup> furthermore, data on the role of facilities in the transmission of  
11  
12 COVID-19 are presented.  
13  
14

### 15 **Conclusion**

16  
17 This novel, rapid review summarises the evidence base to date identifying specific factors for  
18  
19 consideration as part of preparedness plans to reduce transmission of COVID-19 outbreaks in LTCF.  
20  
21 Future research should incorporate methodologically robust study designs with longer follow up to  
22  
23 assess the impact on reducing transmission.  
24  
25  
26  
27  
28  
29

### 30 **Funding**

31  
32 Authors declare no funds were provided for the production of this review.  
33  
34

### 35 **Author Contributions**

36  
37 CK, KF, and LM designed the study; KF and DS developed the search strategy; DS conducted the  
38  
39 literature search; KF and LM screened titles and full texts to select studies, and extracted data; LM,  
40  
41 EL, KF, and CK conducted quality ratings; KF, LM, DS, EL, EC, CK interpreted and synthesised  
42  
43 data; KF, LM, DS, EL, EC, CK were involved in writing. All authors have approved the final version  
44  
45 of the manuscript.  
46  
47  
48

### 49 **Conflicts of Interest**

50  
51 The authors declare no conflicts of interest. CK was a member of an expert panel investigating  
52  
53 COVID-19 in nursing homes in Ireland.  
54  
55  
56

### 57 **Data availability**

58  
59 No additional data available.  
60

## References

### Figure legends

Figure 1. PRISMA flowchart

1. European Centre for Disease Prevention and Control (ECDC). Timeline of ECDC's response to COVID-19 2020 [cited 2020 4th October]. Available from: <https://www.ecdc.europa.eu/en/covid-19/timeline-ecdc-response> accessed 4th October 2020.
2. World Health Organization. Coronavirus disease 2019 (COVID-19) Situation Report – 94, 2020.
3. Nussbaumer-Streit B, Mayr V, Dobrescu AI, et al. Quarantine alone or in combination with other public health measures to control COVID-19: a rapid review. *The Cochrane database of systematic reviews* 2020;4(4):Cd013574. doi: 10.1002/14651858.cd013574 [published Online First: 2020/04/09]
4. European Centre for Disease Prevention and Control (ECDC). Risk assessment: Outbreak of acute respiratory syndrome associated with a novel coronavirus, Wuhan, China. Stockholm: ECDC; 2020 [updated 22 January 2020 Available from: <https://www.ecdc.europa.eu/en/publications-data/rapid-risk-assessment-cluster-pneumonia-cases-caused-novel-coronavirus-wuhan2020>.
5. World Health Organization. Statement on the second meeting of the International Health Regulations (2005) Emergency Committee regarding the outbreak of novel coronavirus (2019-nCoV). Geneva: WHO; 2020 [Available from: [https://www.who.int/news-room/detail/30-01-2020-statement-on-the-second-meeting-of-the-international-health-regulations-\(2005\)-emergency-committee-regarding-the-outbreak-of-novel-coronavirus-\(2019-ncov\)](https://www.who.int/news-room/detail/30-01-2020-statement-on-the-second-meeting-of-the-international-health-regulations-(2005)-emergency-committee-regarding-the-outbreak-of-novel-coronavirus-(2019-ncov))].
6. Meng X, Deng Y, Dai Z, et al. COVID-19 and anosmia: A review based on up-to-date knowledge. *Am J Otolaryngol* 2020;41(5):102581-81. doi: 10.1016/j.amjoto.2020.102581 [published Online First: 06/02]
7. European Centre for Disease Prevention and Control (ECDC). COVID-19 situation update worldwide, as of week 12, updated 1 April 2021 2021 [Available from: <https://www.ecdc.europa.eu/en/geographical-distribution-2019-ncov-cases> accessed 8th April 2021.

- 1  
2  
3 8. European Centre for Disease Prevention and Control (ECDC). Surveillance of COVID-19 at  
4 longterm care facilities in the EU/EEA. Technical Report, 2020.
- 5  
6 9. ECDC Public Health Emergency Team, Danis K, Fonteneau L, et al. High impact of COVID-19 in  
7 long-term care facilities, suggestion for monitoring in the EU/EEA, May 2020. *Euro Surveill*  
8 2020;25(22):2000956. doi: 10.2807/1560-7917.ES.2020.25.22.2000956
- 9  
10 10. Mueller AL, McNamara MS, Sinclair DA. Why does COVID-19 disproportionately affect older  
11 people? *Aging* 2020;12(10):9959-81. doi: 10.18632/aging.103344 [published Online First:  
12 2020/05/30]
- 13  
14 11. United Nations. Policy Brief: The Impact of COVID-19 on older persons, 2020.
- 15  
16 12. World Health Organization. Policy Brief: The Impact of COVID-19 on older persons, 2020.
- 17  
18 13. Frazer K, Mitchell L, Stokes D, et al. Systematic review of measures to protect older people in  
19 long term care facilities from COVID 19. *PROSPERO: International prospective register of*  
20 *systematic reviews* 2020;CRD42020191569
- 21  
22 14. Moher D, Liberati A, Tetzlaff J, et al. Preferred Reporting Items for Systematic Reviews and  
23 Meta-Analyses: The PRISMA Statement. *PLoS Medicine* 2009;6(7):e1000097. doi:  
24 10.1371/journal.pmed.1000097
- 25  
26 15. Hong QN, Fàbregues S, Bartlett G, et al. The Mixed Methods Appraisal Tool (MMAT) version  
27 2018 for information professionals and researchers. *Education for Information* 2018;34:285-  
28 91. doi: 10.3233/EFI-180221
- 29  
30 16. Campbell M, McKenzie JE, Sowden A, et al. Synthesis without meta-analysis (SWiM) in  
31 systematic reviews: reporting guideline. *BMJ* 2020;368:l6890. doi: 10.1136/bmj.l6890
- 32  
33 17. Abrams HR, Loomer L, Gandhi A, et al. Characteristics of U.S. Nursing Homes with COVID-19  
34 Cases. *Journal of the American Geriatrics Society* 2020 doi: 10.1111/jgs.16661
- 35  
36 18. Arons MM, Hatfield KM, Reddy SC, et al. Presymptomatic SARS-CoV-2 infections and  
37 transmission in a skilled nursing facility. *New England Journal of Medicine*  
38 2020;382(22):2081-90. doi: 10.1056/NEJMoa2008457
- 39  
40 19. Blackman C, Farber S, Feifer RA, et al. An Illustration of SARS-CoV-2 Dissemination Within a  
41 Skilled Nursing Facility Using Heat Maps. *Journal of the American Geriatrics Society*  
42 2020;68(10):2174-78. doi: 10.1111/jgs.16642
- 43  
44 20. Dora AV, Winnett A, Jatt LP, et al. Universal and Serial Laboratory Testing for SARS-CoV-2 at a  
45 Long-Term Care Skilled Nursing Facility for Veterans - Los Angeles, California, 2020.  
46 *MMWR Morbidity and mortality weekly report* 2020;69(21):651-55. doi:  
47 10.15585/mmwr.mm6921e1
- 48  
49 21. Eckardt P, Guran R, Hennemyre J, et al. Hospital affiliated long term care facility COVID-19  
50 containment strategy by using prevalence testing and infection control best practices.  
51 *American Journal of Infection Control* 2020 doi: <https://doi.org/10.1016/j.ajic.2020.06.215>
- 52  
53  
54  
55  
56  
57  
58  
59  
60

- 1  
2  
3  
4  
5  
6  
7  
8  
9  
10  
11  
12  
13  
14  
15  
16  
17  
18  
19  
20  
21  
22  
23  
24  
25  
26  
27  
28  
29  
30  
31  
32  
33  
34  
35  
36  
37  
38  
39  
40  
41  
42  
43  
44  
45  
46  
47  
48  
49  
50  
51  
52  
53  
54  
55  
56  
57  
58  
59  
60
22. Feaster M, Goh Y-Y. High Proportion of Asymptomatic SARS-CoV-2 Infections in 9 Long-Term Care Facilities, Pasadena, California, USA, April 2020. *Emerging Infectious Disease journal* 2020;26(10):2416. doi: 10.3201/eid2610.202694
  23. Graham N, Junghans C, Downes R, et al. SARS-CoV-2 infection, clinical features and outcome of COVID-19 in United Kingdom nursing homes. *J Infect* 2020 doi: 10.1016/j.jinf.2020.05.073 [published Online First: 2020/06/07]
  24. Hand J, Rose EB, Salinas A, et al. Severe Respiratory Illness Outbreak Associated with Human Coronavirus NL63 in a Long-Term Care Facility. *Emerg Infect Dis* 2018;24(10):1964-66. doi: 10.3201/eid2410.180862 [published Online First: 2018/09/19]
  25. Harris DA, Archbald-Pannone L, Kaur J, et al. Rapid Telehealth-Centered Response to COVID-19 Outbreaks in Postacute and Long-Term Care Facilities. *Telemedicine and e-Health* 2020;0(0):null. doi: 10.1089/tmj.2020.0236
  26. Kimball A, Hatfield KM, Arons M, et al. Asymptomatic and Presymptomatic SARS-CoV-2 Infections in Residents of a Long-Term Care Skilled Nursing Facility - King County, Washington, March 2020. *MMWR Morbidity and mortality weekly report* 2020;69(13):377-81. doi: 10.15585/mmwr.mm6913e1
  27. Lennon NJ, Bhattacharyya RP, Mina MJ, et al. Comparison of viral levels in individuals with or without symptoms at time of COVID-19 testing among 32,480 residents and staff of nursing homes and assisted living facilities in Massachusetts. *medRxiv* 2020:2020.07.20.20157792. doi: 10.1101/2020.07.20.20157792
  28. Louie JK, Scott HM, DuBois A, et al. Lessons from Mass-Testing for COVID-19 in Long Term Care Facilities for the Elderly in San Francisco. *Clinical Infectious Diseases* 2020 doi: 10.1093/cid/ciaa1020
  29. McMichael TM, Currie DW, Clark S, et al. Epidemiology of covid-19 in a long-term care facility in King County, Washington. *New England Journal of Medicine* 2020;382(21):2008-11. doi: 10.1056/NEJMoa2005412
  30. Patel MC, Chaisson LH, Borgetti S, et al. Asymptomatic SARS-CoV-2 Infection and COVID-19 Mortality During an Outbreak Investigation in a Skilled Nursing Facility. *Clinical Infectious Diseases* 2020 doi: 10.1093/cid/ciaa763
  31. Quicke K, Gallichote E, Sexton N, et al. Longitudinal Surveillance for SARS-CoV-2 RNA Among Asymptomatic Staff in Five Colorado Skilled Nursing Facilities: Epidemiologic, Virologic and Sequence Analysis. *medRxiv* 2020:2020.06.08.20125989. doi: 10.1101/2020.06.08.20125989
  32. Quigley DD, Dick A, Agarwal M, et al. COVID-19 Preparedness in Nursing Homes in the Midst of the Pandemic. *Journal of the American Geriatrics Society* 2020;68(6):1164-66. doi: 10.1111/jgs.16520

- 1  
2  
3  
4  
5  
6  
7  
8  
9  
10  
11  
12  
13  
14  
15  
16  
17  
18  
19  
20  
21  
22  
23  
24  
25  
26  
27  
28  
29  
30  
31  
32  
33  
34  
35  
36  
37  
38  
39  
40  
41  
42  
43  
44  
45  
46  
47  
48  
49  
50  
51  
52  
53  
54  
55  
56  
57  
58  
59  
60
33. Roxby AC, Greninger AL, Hatfield KM, et al. Outbreak Investigation of COVID-19 among Residents and Staff of an Independent and Assisted Living Community for Older Adults in Seattle, Washington. *JAMA Internal Medicine* 2020 doi: 10.1001/jamainternmed.2020.2233
34. Sanchez GV, Biedron C, Fink LR, et al. Initial and Repeated Point Prevalence Surveys to Inform SARS-CoV-2 Infection Prevention in 26 Skilled Nursing Facilities — Detroit, Michigan, March–May 2020. *MMWR Morb Mortal Wkly Rep* 2020;69:882-86. doi: <http://dx.doi.org/10.15585/mmwr.mm6927e1external>
35. Telford CT, Onwubiko U, Holland D, et al. Mass Screening for SARS-CoV-2 Infection among Residents and Staff in Twenty-eight Long-term Care Facilities in Fulton County, Georgia. *medRxiv* 2020:2020.07.01.20144162. doi: 10.1101/2020.07.01.20144162
36. Unruh MA, Yun H, Zhang Y, et al. Nursing Home Characteristics Associated With COVID-19 Deaths in Connecticut, New Jersey, and New York. *Journal of the American Medical Directors Association* 2020;21(7):1001-03. doi: <https://doi.org/10.1016/j.jamda.2020.06.019>
37. Brainard JS, Rushton S, Winters T, et al. Introduction to and spread of COVID-19 in care homes in Norfolk, UK. *Journal of Public Health* 2020;fdaa218 doi: 10.1093/pubmed/fdaa218
38. Burton JK, Bayne G, Evans C, et al. Evolution and impact of COVID-19 outbreaks in care homes: population analysis in 189 care homes in one geographic region of the UK. *Lancet Healthy Longevity* 2020;1(1):e21-31. doi: 10.1016/S2666-7568(20)30012-X
39. Dutey-Magni PF, Williams H, Jhass A, et al. Covid-19 infection and attributable mortality in UK Long Term Care Facilities: Cohort study using active surveillance and electronic records (March-June 2020). *Age and Ageing* 2021;afab060 doi: 10.1093/ageing/afab060
40. Office for National Statistics. Impact of coronavirus in care homes in England: 26 May to 19 June 2020. They Vivaldi study., 2020.
41. Stow D, Barker RO, Matthews FE, et al. National Early Warning Scores (NEWS / NEWS2) and COVID-19 deaths in care homes: a longitudinal ecological study. *medRxiv* 2020:2020.06.15.20131516. doi: 10.1101/2020.06.15.20131516
42. Brown KA, Jones A, Daneman N, et al. Association Between Nursing Home Crowding and COVID-19 Infection and Mortality in Ontario, Canada. *JAMA Internal Medicine* 2021;181(2):229-36. doi: 10.1001/jamainternmed.2020.6466
43. Fisman DN, Bogoch I, Lapointe-Shaw L, et al. Risk Factors Associated With Mortality Among Residents With Coronavirus Disease 2019 (COVID-19) in Long-term Care Facilities in Ontario, Canada. *JAMA Network Open* 2020;3(7):e2015957-e57. doi: 10.1001/jamanetworkopen.2020.15957
44. Stall NM, Jones A, Brown KA, et al. For-profit long-term care homes and the risk of COVID-19 outbreaks and resident deaths. *CMAJ : Canadian Medical Association journal = journal de l'Association medicale canadienne* 2020;192(33):E946-e55. doi: 10.1503/cmaj.201197 [published Online First: 2020/07/24]



- 1  
2  
3  
4  
5  
6  
7  
8  
9  
10  
11  
12  
13  
14  
15  
16  
17  
18  
19  
20  
21  
22  
23  
24  
25  
26  
27  
28  
29  
30  
31  
32  
33  
34  
35  
36  
37  
38  
39  
40  
41  
42  
43  
44  
45  
46  
47  
48  
49  
50  
51  
52  
53  
54  
55  
56  
57  
58  
59  
60
45. Guery R, Delaye C, Brule N, et al. Limited effectiveness of systematic screening by nasopharyngeal RT-PCR of medicalized nursing home staff after a first case of COVID-19 in a resident. *Médecine et Maladies Infectieuses* 2020 doi: <https://doi.org/10.1016/j.medmal.2020.04.020>
46. Sacco G, Foucault G, Briere O, et al. COVID-19 in seniors: Findings and lessons from mass screening in a nursing home. *Maturitas* 2020;141:46-52. doi: <https://doi.org/10.1016/j.maturitas.2020.06.023>
47. Heung LC, Li T, Mak SK, et al. Prevalence of subclinical infection and transmission of severe acute respiratory syndrome (SARS) in a residential care home for the elderly. *Hong Kong Med J* 2006;12(3):201-7. [published Online First: 2006/06/09]
48. Ho WW, Hui E, Kwok TC, et al. An outbreak of severe acute respiratory syndrome in a nursing home. *J Am Geriatr Soc* 2003;51(10):1504-5. doi: 10.1046/j.1532-5415.2003.514841.x [published Online First: 2003/09/27]
49. Hoxha A, Wyndham-Thomas C, Klamer S, et al. Asymptomatic SARS-CoV-2 infection in Belgian long-term care facilities. *The Lancet Infectious Diseases* 2020 doi: [https://doi.org/10.1016/S1473-3099\(20\)30560-0](https://doi.org/10.1016/S1473-3099(20)30560-0)
50. Klein A, Edler C, Fitzek A, et al. Der erste COVID-19-Hotspot in einer Hamburger Senioreneinrichtung. *Rechtsmedizin* 2020;30(5):325-31. doi: 10.1007/s00194-020-00404-1
51. Kennelly SP, Dyer AH, Noonan C, et al. Asymptomatic carriage rates and case-fatality of SARS-CoV-2 infection in residents and staff in Irish nursing homes. *Age and Ageing* 2021;50(1):49-54. doi: 10.1093/ageing/afaa220
52. Iritani O, Okuno T, Hama D, et al. Clusters of COVID-19 in long-term care hospitals and facilities in Japan from 16 January to 9 May 2020. *Geriatrics & Gerontology International* 2020;20(7):715-19. doi: 10.1111/ggi.13973
53. Kim T. Improving Preparedness for and Response to Coronavirus Disease 19 (COVID-19) in Long-Term Care Hospitals in the Korea. *Infect Chemother* 2020 [published Online First: 2020/05/15]
54. Borrás-Bermejo B, Martínez-Gómez X, San Miguel MG, et al. Asymptomatic SARS-CoV-2 Infection in Nursing Homes, Barcelona, Spain, April 2020. *Emerging Infectious Disease journal* 2020;26(9):2281. doi: 10.3201/eid2609.202603
55. Kelleher CC, Doherty B, Donnelly P, et al. COVID-19 Nursing Homes Expert Panel. Examination of Measures to 2021. Report to the Minister for Health, 2020.
56. Sepulveda ER, Stall NM, Sinha SK. A Comparison of COVID-19 Mortality Rates Among Long-Term Care Residents in 12 OECD Countries. *Journal of the American Medical Directors Association* 2020;21(11):1572-74.e3. doi: 10.1016/j.jamda.2020.08.039 [published Online First: 09/12]

- 1  
2  
3 57. Lurie N, Saville M, Hatchett R, et al. Developing Covid-19 Vaccines at Pandemic Speed. *New*  
4 *England Journal of Medicine* 2020;382(21):1969-73. doi: 10.1056/NEJMp2005630  
5  
6 58. Public Health England. Impact of COVID-19 vaccines on mortality in England December 2020 to  
7 February 2021. London, 2021.  
8  
9 59. Montano M. Pressing Questions and Challenges in the HIV-1 and SARS-CoV-2 Syndemic. *AIDS*  
10 *Research and Human Retroviruses* 2021; Ahead of Print doi: 10.1089/aid.2021.0005  
11  
12 60. Institute of Medicine (IOM). Learning from SARS: Preparing for the Next Disease Outbreak:  
13 Workshop Summary. In: Knobler S, Mahmoud A, Lemon S, et al., eds. Learning from SARS:  
14 Preparing for the Next Disease Outbreak: Workshop Summary. Washington (DC): National  
15 Academies Press (US), Copyright © 2004, National Academy of Sciences. 2004.  
16  
17 61. Salcher-Konrad M, Jhass A, Naci H, et al. COVID-19 related mortality and spread of disease in  
18 long-term care: a living systematic review of emerging evidence. *medRxiv*  
19 2020:2020.06.09.20125237. doi: 10.1101/2020.06.09.20125237  
20  
21 62. World Health Organization. Preventing and managing COVID-19 across long-term care services:  
22 policy brief. Geneva, 2020.  
23  
24  
25  
26  
27  
28  
29  
30  
31  
32  
33  
34  
35  
36  
37  
38  
39  
40  
41  
42  
43  
44  
45  
46  
47  
48  
49  
50  
51  
52  
53  
54  
55  
56  
57  
58  
59  
60





only

1  
2  
3  
4 Pubmed

5  
6 Search #1

7  
8 "Residential facilit\*" OR "Residential aged care" OR Convalescent home\* OR "Nursing  
9 Home\*" OR "Homes for the aged" OR "Housing for the elderly" OR "Skilled nursing facilit\*"  
10 OR "long term care" OR "Longterm care" OR Home\* for the aged OR "Old Age Home\*" OR  
11 "long-term care" OR "Nursing Homes"[Mesh] OR "long-term care"[MeSH] OR "Residential  
12 Facilities"[Mesh] OR "Housing for the Elderly"[Mesh]

13  
14  
15 213,035 Results

16  
17 Intervention

18  
19 Search #2

20  
21  
22 ("Infection control" OR Infection prevention and control\* OR "Patient Safety" OR "Patient  
23 harm" OR "Patient risk" OR "Health care Delivery" OR transmission OR body substance  
24 isolation\* OR physical barrier\* OR physical intervention\* OR physical protection\* OR  
25 personal protection\* OR person protection\* OR BSI OR IPC OR N95 OR ffp1 OR ffp3 OR  
26 ffp2 OR transmission\* OR contamination\* OR shedding OR fomite\* OR gap\* OR non-pharm  
27 intervention\* OR non-pharmaceutical intervention\* OR Shield OR N99 OR N97 OR  
28 Ventilator\* OR Space OR spacing or separation OR "Communicable Disease Control" OR  
29 "Primary Prevention" OR facemask\* OR face mask\* OR face-mask\* OR "Delivery of Health  
30 Care" OR "Disease transmission" OR "Infectious Disease Transmission" OR PPE OR  
31 "Personal Protective Equipment" OR mask\* OR virucide\* OR antiviral agent\* OR  
32 Handwashing OR "Hand washing" OR "Hand Disinfection" OR "hand hygiene" OR distancing  
33 OR distances OR aerosol-generating procedure\* OR patient isolation\* OR patient isolator\*  
34 OR person isolator\* OR "individual isolation" OR individual isolator\* OR filtering face piece\*  
35 OR face protection\* OR face shield\* OR face protective device\* OR face protective gear\*  
36 OR eye protection\* OR eye shield\* OR eye protective device\* OR eye protective gear\* OR  
37 Eye mask\* OR airborne precaution\* OR droplet precaution\* OR safety supply OR safety  
38 supplies\* OR safety device\* OR safety equipment\* OR safety measure\* OR safety gear\* OR  
39 protective supply\* OR protective supplies\* OR protective device\* OR protective equipment\*  
40 OR protective measure\* OR protective gear\* OR "personal isolation" OR respirator\* OR  
41 respiratory protection\* OR respiratory protective device\* OR "respiratory protective supply"  
42 OR "respiratory protective supplies" OR "respiratory protective equipment" OR "respiratory  
43 protective gear" OR "safely equipped" OR meter OR metre OR foot OR feet OR meters OR  
44 metres OR head cover\* OR face cover\* OR eye cover\* OR goggle\* OR protective clothing\*  
45 OR "Infection Control"[Mesh] OR "Personal Protective Equipment"[Mesh] OR "Hand  
46 Disinfection"[Mesh] OR "Communicable Disease Control"[Mesh:NoExp] OR "Disease  
47 Transmission, Infectious"[Mesh] OR "Primary Prevention"[Mesh] OR "Delivery of Health  
48 Care"[Mesh:NoExp] OR "Fomites"[Mesh] OR "Ventilators, Mechanical"[Mesh] OR  
49 "Communicable Disease Control"[Mesh] OR "Primary Prevention"[Mesh] OR "Delivery of  
50 Health Care"[Mesh] OR "Patient Isolation"[Mesh] OR "Patient Safety"[Mesh] OR "Patient  
51 Harm"[Mesh])

52  
53  
54  
55  
56  
57  
58  
59 5,741,706 results

1  
2  
3 And

4  
5 Search #3

6  
7 (Coronavirus\* OR "Corona virus" OR Betacoronavirus or Beta-coronavirus OR Corona\* OR  
8 coronaviral OR coronaviridae OR coronavirida OR coronaviridae OR coronaviridea OR  
9 coronaviridae OR coronavirinae OR coronavirion OR coronavirions OR coronavirose OR  
10 coronaviruslike OR coronaviser OR coronavirs OR coronaviruses OR coronavirus OR  
11 coronavirus OR COVIDOR SARS OR SARS-CoV OR "Middle East respiratory syndrome"  
12 OR MERS OR MERS-CoV OR "Severe Acute Respiratory Syndrome" OR "severe acute  
13 respiratory pneumonia outbreak" OR 2019-nCoV OR nCoV OR COVID-2019 OR "COVID  
14 2019" OR cov2 OR Covid19 OR COVID-19 OR COVID 19 OR SARS-CoV\* OR  
15 coronaviridae OR "corona virus" OR "SARS-CoV-2" OR "sars cov2" OR "SARS-CoV-19" OR  
16 2019nCoV OR "SARS-CoV" OR SARSCOV2 OR "2019 coronavirus" OR "SARS2" OR  
17 "2019 corona virus" OR covid19 OR "novel corona virus" OR "new corona virus" OR "novel  
18 coronavirus" OR "new coronavirus" OR "coronavirus infection" OR "nouveau coronavirus"  
19 OR "COVID-19" [Supplementary Concept] OR "severe acute respiratory syndrome  
20 coronavirus 2" [Supplementary Concept] OR "Coronavirus Infections"[Mesh] OR  
21 "Coronavirus"[Mesh] OR "Middle East Respiratory Syndrome Coronavirus"[Mesh] OR  
22 "Coronavirus Infections"[Mesh] OR "SARS Virus"[Mesh] OR "Betacoronavirus"[Mesh])

23  
24  
25  
26  
27  
28  
29 595,661 results

30  
31 Search #4 = #2 AND #3 116,217 results

32  
33 Outcomes

34  
35 Search #5

36  
37 Mortality OR "Death rate\*" OR "Mortality Rate\*" OR Morbidity OR "Risk of Infection" OR  
38 "infection risk" OR "Mortality"[Mesh:NoExp] OR "Morbidity"[Mesh]

39  
40  
41 3,204,107 results

42  
43 Search #6 = #1 AND #4 AND #5

44  
45  
46  
47  
48  
49  
50  
51  
52 EMBASE

53  
54 Search #1

55  
56 "Residential facilit\*" OR "Residential aged care" OR "Convalescent home\*" OR "Nursing  
57 Home\*" OR "Homes for the aged" OR "Housing for the elderly" OR "Skilled nursing facilit\*"  
58 OR "long term care" OR "Longterm care" OR "Home\* for the aged" OR "Old Age Home\*" OR

1  
2  
3 “long-term care” OR 'residential home'/exp OR 'nursing home'/exp OR 'home for the  
4 aged'/exp OR 'skilled nursing facility'/exp OR 'long term care'/de

5  
6 212,416 results

7  
8 Intervention

9  
10 Search #2

11  
12  
13 (“Infection control” OR “Infection prevention and control\*” OR “Patient Safety” OR “Patient  
14 harm” OR “Patient risk” OR “body substance isolation\*” OR “physical barrier\*” OR “physical  
15 intervention\*” OR “physical protection\*” OR “personal protection\*” OR “person protection\*”  
16 OR BSI OR IPC OR N95 OR ffp1 OR ffp3 OR ffp2 OR transmission\* OR contamination\* OR  
17 shedding OR fomite\* OR gap\* OR “non-pharm intervention\*” OR “non-pharmaceutical  
18 intervention\*” OR Shield OR N99 OR N97 OR Ventilator\* OR Space OR spacing OR  
19 separation OR “Communicable Disease Control” OR "Primary Prevention" OR facemask\*  
20 OR face-mask\* OR “face mask\*” OR "Delivery of Health Care" OR “Health Care Delivery”  
21 OR “Disease transmission” OR “Infectious Disease Transmission” OR PPE OR “Personal  
22 Protective Equipment” OR mask\* OR virucide\* OR antiviral agent\* OR Handwashing OR  
23 “Hand washing” OR “Hand Disinfection” OR “hand hygiene” OR distancing OR distances OR  
24 “aerosol-generating procedure\*” OR “patient isolation\*” OR “patient isolator\*” OR “person  
25 isolator\*” OR “individual isolation” OR “individual isolator\*” OR “filtering face piece\*” OR “face  
26 protection\*” OR “face shield\*” OR “face protective device\*” OR “face protective gear\*” OR  
27 “eye protection\*” OR “eye shield\*” OR “eye protective device\*” OR “eye protective gear\*” OR  
28 “Eye mask\*” OR “airborne precaution\*” OR “droplet precaution\*” OR “safety supply” OR  
29 “safety supplies\*” OR “safety device\*” OR “safety equipment\*” OR “safety measure\*” OR  
30 “safety gear\*” OR “protective supply\*” OR “protective supplies\*” OR “protective device\*” OR  
31 “protective equipment\*” OR “protective measure\*” OR “protective gear\*” OR “personal  
32 isolation” OR respirator\* OR “respiratory protection\*” OR “respiratory protective device\*” OR  
33 “respiratory protective supply” OR “respiratory protective supplies” OR “respiratory protective  
34 equipment” OR “respiratory protective gear” OR “safely equipped” OR meter OR metre OR  
35 foot OR feet OR meters OR metres OR “head cover\*” OR “face cover\*” OR “eye cover\*” OR  
36 goggle\* OR “protective clothing\*” OR 'infection control'/exp OR 'patient safety'/exp OR  
37 'disease transmission'/exp OR 'contamination'/exp OR 'shedding'/exp OR 'fomite'/exp OR  
38 'shield'/exp OR 'ventilator'/exp OR 'space'/exp OR 'separation'/exp OR 'communicable  
39 disease control'/exp OR 'primary prevention'/exp OR 'face mask'/exp OR 'health care  
40 delivery'/exp OR 'protective equipment'/exp OR 'mask'/exp OR 'antivirus agent'/exp OR  
41 'hand washing'/exp OR 'patient isolation'/exp OR 'face shield'/exp OR 'eye protective  
42 device'/exp OR 'ventilator'/exp OR 'respiratory protection'/exp OR 'goggle'/exp OR  
43 'protective clothing'/exp)

44  
45  
46 6,030,646 results

47  
48 And

49  
50 Search #3

51  
52  
53 (Coronavirus\* OR “Corona virus” OR Betacoronavirus or Beta-coronavirus OR Corona\* OR  
54 coronaviral OR coronaviridae OR coronavirida OR coronaviridae OR coronaviridea OR  
55  
56  
57  
58  
59  
60

1  
2  
3 coronaviridae OR coronavirinae OR coronavirion OR coronavirions OR coronavirose OR  
4 coronavirus OR coronaviruses OR coronavirus OR coronaviruses OR coronaviruses OR  
5 coronaviruslike OR coronaviser OR coronaviruses OR coronaviruses OR coronavirus OR  
6 coronavirus OR COVIDOR SARS OR SARS-CoV OR "Middle East respiratory syndrome"  
7 OR MERS OR MERS-CoV OR "Severe Acute Respiratory Syndrome" OR "severe acute  
8 respiratory pneumonia outbreak" OR 2019-nCoV OR nCoV OR COVID-2019 OR "COVID  
9 2019" OR cov2 OR Covid19 OR COVID-19 OR COVID 19 OR SARS-CoV\* OR "SARS-CoV-  
10 2" OR "sars cov2" OR "SARS-CoV-19" OR 2019nCoV OR "SARS-CoV" OR SARSCOV2 OR  
11 "2019 coronavirus" OR "SARS2" OR "2019 corona virus" OR covid19 OR "novel corona  
12 virus" OR "new corona virus" OR "novel coronavirus" OR "new coronavirus" OR "coronavirus  
13 infection" OR "nouveau coronavirus" OR 'Coronavirinae'/exp OR 'Betacoronavirus'/exp OR  
14 'severe acute respiratory syndrome'/exp OR 'covid 19'/exp OR 'Coronavirus infection'/exp)

15  
16  
17  
18  
19 45,801 results

20  
21 Search #4 = #2 AND #3 27,921 results

22  
23 Outcomes

24  
25 Search #5

26  
27 Mortality OR "Death rate\*" OR "Mortality Rate\*" OR Morbidity OR "Risk of Infection" OR  
28 "Infection risk" OR 'mortality'/exp OR 'mortality rate'/exp OR 'morbidity'/exp OR 'infection  
29 risk'/exp

30  
31  
32 1,862,861 results

33  
34 Search #6 = #1 AND #4 AND #5

35  
36  
37  
38  
39  
40  
41 CINAHL

42  
43 Search #1

44  
45 "Residential facilit\*" OR "Residential aged care" OR "Convalescent home\*" OR "Nursing  
46 Home\*" OR "Homes for the aged" OR "Housing for the elderly" OR "Skilled nursing facilit\*"  
47 OR "long term care" OR "Longterm care" OR "Home\* for the aged" OR "Old Age Home\*" OR  
48 "long-term care" OR (MH "Residential Facilities") OR (MH "Nursing Homes+") OR (MH  
49 "Housing for the Elderly") OR (MH "Long Term Care")

50  
51  
52 83,231 results

53  
54 Intervention

55  
56 Search #2

("Infection control" OR "Infection prevention and control\*" OR "Patient Safety" OR "Patient harm" OR "Patient risk" OR "body substance isolation\*" OR "physical barrier\*" OR "physical intervention\*" OR "physical protection\*" OR "personal protection\*" OR "person protection\*" OR BSI OR IPC OR N95 OR ffp1 OR ffp3 OR ffp2 OR transmission\* OR contamination\* OR shedding OR fomite\* OR gap\* OR "non-pharm intervention\*" OR "non-pharmaceutical intervention\*" OR Shield OR N99 OR N97 OR Ventilator\* OR Space OR spacing OR separation OR "Communicable Disease Control" OR "Primary Prevention" OR facemask\* OR face-mask\* OR "face mask\*" OR "Delivery of Health Care" OR "Health Care Delivery" OR "Disease transmission" OR "Infectious Disease Transmission" OR PPE OR "Personal Protective Equipment" OR mask\* OR virucide\* OR antiviral agent\* OR Handwashing OR "Hand washing" OR "Hand Disinfection" OR "hand hygiene" OR distancing OR distances OR "aerosol-generating procedure\*" OR "patient isolation\*" OR "patient isolator\*" OR "person isolator\*" OR "individual isolation" OR "individual isolator\*" OR "filtering face piece\*" OR "face protection\*" OR "face shield\*" OR "face protective device\*" OR "face protective gear\*" OR "eye protection\*" OR "eye shield\*" OR "eye protective device\*" OR "eye protective gear\*" OR "Eye mask\*" OR "airborne precaution\*" OR "droplet precaution\*" OR "safety supply" OR "safety supplies\*" OR "safety device\*" OR "safety equipment\*" OR "safety measure\*" OR "safety gear\*" OR "protective supply\*" OR "protective supplies\*" OR "protective device\*" OR "protective equipment\*" OR "protective measure\*" OR "protective gear\*" OR "personal isolation" OR respirator\* OR "respiratory protection\*" OR "respiratory protective device\*" OR "respiratory protective supply" OR "respiratory protective supplies" OR "respiratory protective equipment" OR "respiratory protective gear" OR "safely equipped" OR meter OR metre OR foot OR feet OR meters OR metres OR "head cover\*" OR "face cover\*" OR "eye cover\*" OR goggle\* OR "protective clothing\*" OR (MH "Infection Control") OR (MH "Handwashing") OR (MH "Patient Safety") OR (MH "Disease Transmission+") OR (MH "Microbial Contamination") OR (MH "Ventilators, Mechanical") OR (MH "Masks") OR (MH "Health Care Delivery+") OR (MH "Protective Devices+") OR (MH "Patient Isolation+")

917,391 results

And

Search #3

(Coronavirus\* OR "Corona virus" OR Betacoronavirus or Beta-coronavirus OR Corona\* OR coronaviral OR coronaviridae OR coronavirida OR coronaviridae OR coronaviridea OR coronaviridae OR coronavirinae OR coronavirion OR coronavirions OR coronaviruses OR coronavirus OR coronavirues OR coronavirusce OR coronaviruse OR coronaviruses OR coronaviruslike OR coronaviser OR coronavirs OR coronaviruses OR coronavirius OR coronavirius OR COVIDOR SARS OR SARS-CoV OR "Middle East respiratory syndrome" OR MERS OR MERS-CoV OR "Severe Acute Respiratory Syndrome" OR "severe acute respiratory pneumonia outbreak" OR 2019-nCoV OR nCoV OR COVID-2019 OR "COVID 2019" OR cov2 OR Covid19 OR COVID-19 OR COVID 19 OR SARS-CoV\* OR OR "SARS-CoV-2" OR "sars cov2" OR "SARS-CoV-19" OR 2019nCoV OR "SARS-CoV" OR SARSCOV2 OR "2019 coronavirus" OR "SARS2" OR "2019 corona virus" OR covid19 OR "novel corona virus" OR "new corona virus" OR "novel coronavirus" OR "new coronavirus" OR "coronavirus infection" OR "nouveau coronavirus" OR (MH "Coronavirus+") OR (MH "Coronaviridae Infections+" ) )



1  
2  
3 141,416 results  
4

5 Search #4 = #2 AND #3 15,251 results  
6

7 Outcomes  
8

9 Search #5  
10

11 Mortality OR "Death rate\*" OR "Mortality Rate\*" OR Morbidity OR "Risk of Infection" OR  
12 "Infection risk" OR (MH "Mortality+") OR (MH "Morbidity+")  
13  
14

15 501,502 results  
16

17 Search #6 = #1 AND #4 AND #5  
18  
19

20  
21  
22 Cochrane library  
23  
24  
25

26 #1 MeSH descriptor: [Coronavirus Infections] explode all trees 179  
27

28 #2 MeSH descriptor: [Coronavirus] explode all trees 18  
29

30  
31 #3 Coronavirus OR "Corona virus" OR Betacoronavirus or Beta-coronavirus OR Corona  
32 OR coronaviral OR coronavirdae OR coronavirida OR coronaviridae OR coronaviridea OR  
33 coronaviridae OR coronavirinae OR coronavirion OR coronavirions OR coronaviruses OR  
34 coronavirus OR coronavirues OR coronavirusce OR coronaviruse OR coronaviruses OR  
35 coronaviruslike OR coronaviser OR coronavirs OR coronaviruses OR coronavirus OR  
36 coronavirus OR COVIDOR SARS OR SARS-CoV OR "Middle East respiratory syndrome"  
37 OR MERS OR MERS-CoV OR "Severe Acute Respiratory Syndrome" OR "severe acute  
38 respiratory pneumonia outbreak" OR nCoV OR COVID-2019 OR "COVID 2019" OR cov2  
39 OR Covid19 OR COVID-19 OR COVID 19 OR SARS-CoV\* OR coronaviridae OR "corona  
40 virus" OR "SARS-CoV-2" OR "sars cov2" OR "SARS-CoV-19" OR 2019nCoV OR "SARS-  
41 CoV" OR SARSCOV2 OR "2019 coronavirus" OR "SARS2" OR "2019 corona virus" OR  
42 covid19 OR "novel corona virus" OR "new corona virus" OR "novel coronavirus" OR "new  
43 coronavirus" OR "coronavirus infection" OR "nouveau coronavirus" 1173  
44  
45  
46

47 #4 #1 OR #2 OR #3 1173  
48

49  
50 #5 "Infection control" OR Infection prevention and control\* OR "Patient Safety" OR  
51 "Patient harm" OR "Patient risk" OR "Health care Delivery" OR transmission OR body  
52 substance isolation\* OR physical barrier\* OR physical intervention\* OR physical protection\*  
53 OR personal protection\* OR person protection\* OR BSI OR IPC OR N95 OR ffp1 OR ffp3  
54 OR ffp2 OR transmission\* OR contamination\* OR shedding OR fomite\* OR gap\* OR non-  
55 pharm intervention\* OR non-pharmaceutical intervention\* OR Shield OR N99 OR N97 OR  
56 Ventilator\* OR Space OR spacing or separation OR "Communicable Disease Control" OR  
57 "Primary Prevention" OR facemask\* OR face mask\* OR face-mask\* OR "Delivery of Health  
58 Care" OR "Disease transmission" OR "Infectious Disease Transmission" OR PPE OR  
59  
60

1  
2  
3 “Personal Protective Equipment” OR mask\* OR virucide\* OR antiviral agent\* OR  
4 Handwashing OR “Hand washing” OR “Hand Disinfection” OR “hand hygiene” OR distancing  
5 OR distances OR aerosol-generating procedure\* OR patient isolation\* OR patient isolator\*  
6 OR person isolator\* OR “individual isolation” OR individual isolator\* OR filtering face piece\*  
7 OR face protection\* OR face shield\* OR face protective device\* OR face protective gear\*  
8 OR eye protection\* OR eye shield\* OR eye protective device\* OR eye protective gear\* OR  
9 Eye mask\* OR airborne precaution\* OR droplet precaution\* OR safety supply OR safety  
10 supplies\* OR safety device\* OR safety equipment\* OR safety measure\* OR safety gear\* OR  
11 protective supply\* OR protective supplies\* OR protective device\* OR protective equipment\*  
12 OR protective measure\* OR protective gear\* OR “personal isolation” OR respirator\* OR  
13 respiratory protection\* OR respiratory protective device\* OR “respiratory protective supply”  
14 OR “respiratory protective supplies” OR “respiratory protective equipment” OR “respiratory  
15 protective gear” OR “safely equipped” OR meter OR metre OR foot OR feet OR meters OR  
16 metres OR head cover\* OR face cover\* OR eye cover\* OR goggle\* OR protective clothing\*  
17  
18  
19  
20 300480  
21

22 #6 MeSH descriptor: [Infection Control] explode all trees 1147  
23  
24 #7 MeSH descriptor: [Personal Protective Equipment] explode all trees 2284  
25  
26 #8 MeSH descriptor: [Hand Disinfection] explode all trees 378  
27  
28 #9 MeSH descriptor: [Communicable Disease Control] explode all trees 4791  
29  
30 #10 MeSH descriptor: [Disease Transmission, Infectious] explode all trees 856  
31  
32 #11 MeSH descriptor: [Primary Prevention] explode all trees 4005  
33  
34 #12 MeSH descriptor: [Delivery of Health Care] explode all trees 44666  
35  
36 #13 MeSH descriptor: [Fomites] explode all trees 9  
37  
38 #14 MeSH descriptor: [Ventilators, Mechanical] explode all trees 264  
39  
40 #15 MeSH descriptor: [Patient Isolation] explode all trees 51  
41  
42 #16 MeSH descriptor: [Patient Safety] explode all trees 580  
43  
44 #17 MeSH descriptor: [Patient Harm] explode all trees 3  
45  
46 #18 #5 OR #6 OR #7 OR #8 OR #9 OR #10 OR #11 OR #12 OR #13 OR #14 OR #15  
47 OR #16 OR #17 336372  
48  
49 #19 #18 AND #4 651  
50  
51  
52 #20 residential facilit\* OR residential aged care OR Convalescent home OR Nursing  
53 home\* OR Homes for the aged OR Housing for the elderly OR Skilled nursing facilit\* OR  
54 Long term care OR Longterm care OR Home\* for the aged OR old age home OR Long-term  
55 care 121379  
56  
57  
58  
59  
60



- 1  
2  
3 #21 MeSH descriptor: [Long-Term Care] explode all trees 1112  
4  
5 #22 MeSH descriptor: [Nursing Homes] explode all trees 1314  
6  
7 #23 MeSH descriptor: [Residential Facilities] explode all trees 1711  
8  
9 #24 MeSH descriptor: [Housing for the Elderly] explode all trees 39  
10  
11  
12 #25 #20 OR #21 OR #22 OR #23 OR #24 121450  
13  
14 #26 Mortality OR "Death rate\*" OR "Mortality Rate\*" OR Morbidity OR "Risk of Infection"  
15 OR "infection risk" 111129  
16  
17 #27 MeSH descriptor: [Mortality] explode all trees 12838  
18  
19 #28 MeSH descriptor: [Morbidity] explode all trees 14392  
20  
21  
22 #29 #26 OR #27 OR #28 124060  
23  
24 #30 #19 AND #25 AND #29  
25  
26  
27  
28  
29  
30

31 Medrxiv

32  
33 "((COVID-19 OR SARS-CoV-2) And ("Infection control")) AND (Mortality) AND ("nursing  
34 homes")"  
35  
36  
37  
38  
39  
40  
41  
42  
43  
44  
45  
46  
47  
48  
49  
50  
51  
52  
53  
54  
55  
56  
57  
58  
59  
60

Supplemental Table 2. Quality Review

|                            |                          | <i>SI</i> | <i>S2</i> | <i>3.1</i> | <i>3.2</i> | <i>3.3</i> | <i>3.4</i> | <i>3.5</i> | <i>4.1</i> | <i>4.2</i> | <i>4.3</i> | <i>4.4</i> | <i>4.5</i> | <i>Comments</i>                                                                                                      |
|----------------------------|--------------------------|-----------|-----------|------------|------------|------------|------------|------------|------------|------------|------------|------------|------------|----------------------------------------------------------------------------------------------------------------------|
| <b>Abrams (2020)</b>       | Quantitative descriptive | Y         | Y         |            |            |            |            |            | Y          | CT         | Y          | CT         | Y          |                                                                                                                      |
| <b>Arons (2020)</b>        | Quantitative descriptive | Y         | Y         |            |            |            |            |            | Y          | Y          | Y          | N          | Y          |                                                                                                                      |
| <b>Blackman 2020</b>       | Quantitative descriptive | Y         | Y         |            |            |            |            |            | Y          | N          | Y          | CT         | Y*         | *Data very limited to descriptive statistics (counts)                                                                |
| <b>Borras-Bermejo 2020</b> | Quantitative descriptive | Y         | Y         |            |            |            |            |            | Y          | CT         | Y          | N          | Y*         | *Data minimal descriptive statistics. Reported as a brief letter.                                                    |
| <b>Brainard (2020)</b>     | Non-randomised           | Y         | Y         | CT         | Y          | Y          | CT         | Y          |            |            |            |            |            |                                                                                                                      |
| <b>Brown (2021)</b>        | Non-randomised           | Y         | Y         | Y          | Y          | Y          | N          | Y          | Y          | Y          | Y          | Y          | Y          |                                                                                                                      |
| <b>Burton (2020)</b>       | Quantitative descriptive | Y         | Y         |            |            |            |            |            | Y          | Y          | Y          | Y          | Y          |                                                                                                                      |
| <b>Dora (2020)</b>         | Quantitative descriptive | Y         | Y         |            |            |            |            |            | Y          | Y          | Y          | Y          | Y*         | *Data reporting descriptive data from an outbreak (counts and percentages)                                           |
| <b>Dutey-Magni (2021)</b>  | Non-randomised           | Y         | Y         | Y          | Y          | Y          | N          | Y          |            |            |            |            |            |                                                                                                                      |
| <b>Eckhardt (2020)</b>     | Quantitative descriptive | Y         | Y         |            |            |            |            |            | Y          | Y          | Y          | Y          | Y*         | *Limited descriptive data (point prevalence data, counts & percentages)                                              |
| <b>Feaster (2020)</b>      | Quantitative descriptive | Y         | Y         |            |            |            |            |            | Y          | Y          | Y          | Y          | Y          |                                                                                                                      |
| <b>Fisman (2020b)</b>      | Non-randomised           | Y         | Y         | Y          | Y          | Y          | N          | Y          |            |            |            |            |            |                                                                                                                      |
| <b>Graham (2020)</b>       | Quantitative descriptive | Y         | Y         |            |            |            |            |            | Y          | N          | Y          | Y          | Y          |                                                                                                                      |
| <b>Guery (2020)</b>        | Quantitative descriptive | Y         | Y         |            |            |            |            |            | Y          | Y          | Y          | Y          | Y*         | *Limited descriptive data reported. Outbreak reported as a published letter. Research letter reporting minimal data. |
| <b>Hand (2018)</b>         | Quantitative descriptive | Y         | CT        |            |            |            |            |            |            |            |            |            |            |                                                                                                                      |
| <b>Harris (2020)</b>       | Quantitative descriptive | Y         | Y         |            |            |            |            |            | Y          | Y          | Y          | Y          | Y*         | *Data limited to descriptive statistics                                                                              |
| <b>Heung (2006)</b>        | Quantitative descriptive | Y         | Y         |            |            |            |            |            | Y          | Y          | Y          | N          | Y*         | *Limited descriptive data                                                                                            |
| <b>Ho (2003)</b>           | Quantitative descriptive | Y         | CT        |            |            |            |            |            |            |            |            |            |            | Report of conference symposium. Limited details                                                                      |
| <b>Hoxha 2020</b>          | Quantitative descriptive | Y         | Y         |            |            |            |            |            | Y          | Y          | Y          | CT         | Y          |                                                                                                                      |
| <b>Iritani 2020</b>        | Non-randomised           | Y         | Y         | N          | CT         | Y          | Y          | CT         |            |            |            |            |            |                                                                                                                      |
| <b>Kennelly (2021)</b>     | Quantitative descriptive | Y         | Y         |            |            |            |            |            | CT         | Y          | Y          | N          | Y          |                                                                                                                      |
| <b>Kim (2020)</b>          | Quantitative descriptive | Y         | CT        |            |            |            |            |            | N          | N          | N          | N          | N          |                                                                                                                      |
| <b>Kimball (2020)</b>      | Quantitative descriptive | Y         | Y         |            |            |            |            |            | Y          | Y          | Y          | Y          | Y*         | *Data limited to descriptive statistics (counts/ percentages) brief report                                           |

|                                              |                                        |   |   |    |   |   |    |   |    |    |    |    |    |                                                                     |
|----------------------------------------------|----------------------------------------|---|---|----|---|---|----|---|----|----|----|----|----|---------------------------------------------------------------------|
| <b>Klein (2020)</b>                          | Quantitative descriptive               | N | N |    |   |   |    |   |    |    |    |    |    | Autopsy reporting                                                   |
| <b>Lennon (2020) +</b>                       | Quantitative descriptive               | Y | Y |    |   |   |    |   | Y  | CT | Y  | Y  | Y  |                                                                     |
| <b>Louie (2020)</b>                          | Quantitative descriptive               | Y | Y |    |   |   |    |   | Y  | Y  | Y  | Y  | Y* | *Data limited to descriptive statistics presented in a brief report |
| <b>McMichael (2020b)</b>                     | Quantitative descriptive               | Y | Y |    |   |   |    |   | Y  | Y  | Y  | N  | Y* | *Data limited to descriptive statistics                             |
| <b>Office for National Statistics (2020)</b> | Quantitative descriptive               | Y | Y |    |   |   |    |   | Y  | CT | Y  | CT | Y  |                                                                     |
| <b>Patel (2020)</b>                          | Longitudinal, Descriptive quantitative | Y | Y |    |   |   |    |   | Y  | Y  | Y  | Y  | Y  |                                                                     |
| <b>Quicke (2020) +</b>                       | Quantitative descriptive               | Y | Y |    |   |   |    |   | CT | CT | CT | CT | Y  | Limited data reported and virologic assay.                          |
| <b>Quigley (2020)</b>                        | Quantitative descriptive               | Y | Y |    |   |   |    |   | Y  | N  | Y  | N  | Y* | *Limited descriptive data reported in a research letter             |
| <b>Roxby (2020) JAMA</b>                     | Quantitative descriptive               | Y | Y |    |   |   |    |   | Y  | Y  | Y  | Y  | Y* | *Descriptive data reported                                          |
| <b>Sacco (2020)</b>                          | Quantitative descriptive               | Y | Y |    |   |   |    |   | Y  | Y  | Y  | Y  | Y  |                                                                     |
| <b>Sanchez (2020)</b>                        | Quantitative descriptive               | Y | Y |    |   |   |    |   | CT | CT | Y  | CT | Y* | *Descriptive data reported on prevalence (counts/ percentages)      |
| <b>Stall (2020) (CMAJ)</b>                   | Non-randomised                         | Y | Y | CT | Y | Y | CT | Y |    |    |    |    |    |                                                                     |
| <b>Stow (2020) +</b>                         | Quantitative descriptive               | Y | Y |    |   |   |    |   | Y  | Y  | Y  | Y  | Y  |                                                                     |
| <b>Telford (2020) +</b>                      | Non-randomised                         | Y | Y | CT | Y | Y | N  | Y |    |    |    |    |    |                                                                     |
| <b>Unruh (2020)</b>                          | Quantitative descriptive               | Y | Y |    |   |   |    |   | Y  | CT | Y  | Y  | Y  |                                                                     |

Y = Yes, N= No, CT= Can't tell

+ pre published manuscript available

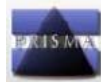

# PRISMA 2009 Checklist

| Section/topic                      | #  | Checklist item                                                                                                                                                                                                                                                                                              | Reported on page #     |
|------------------------------------|----|-------------------------------------------------------------------------------------------------------------------------------------------------------------------------------------------------------------------------------------------------------------------------------------------------------------|------------------------|
| <b>TITLE</b>                       |    |                                                                                                                                                                                                                                                                                                             |                        |
| Title                              | 1  | Identify the report as a systematic review, meta-analysis, or both.                                                                                                                                                                                                                                         | 1                      |
| <b>ABSTRACT</b>                    |    |                                                                                                                                                                                                                                                                                                             |                        |
| Structured summary                 | 2  | Provide a structured summary including, as applicable: background; objectives; data sources; study eligibility criteria, participants, and interventions; study appraisal and synthesis methods; results; limitations; conclusions and implications of key findings; systematic review registration number. | 2                      |
| <b>INTRODUCTION</b>                |    |                                                                                                                                                                                                                                                                                                             |                        |
| Rationale                          | 3  | Describe the rationale for the review in the context of what is already known.                                                                                                                                                                                                                              | 3                      |
| Objectives                         | 4  | Provide an explicit statement of questions being addressed with reference to participants, interventions, comparisons, outcomes, and study design (PICOS).                                                                                                                                                  | 4                      |
| <b>METHODS</b>                     |    |                                                                                                                                                                                                                                                                                                             |                        |
| Protocol and registration          | 5  | Indicate if a review protocol exists, if and where it can be accessed (e.g., Web address), and, if available, provide registration information including registration number.                                                                                                                               | 4                      |
| Eligibility criteria               | 6  | Specify study characteristics (e.g., PICOS, length of follow-up) and report characteristics (e.g., years considered, language, publication status) used as criteria for eligibility, giving rationale.                                                                                                      | 5                      |
| Information sources                | 7  | Describe all information sources (e.g., databases with dates of coverage, contact with study authors to identify additional studies) in the search and date last searched.                                                                                                                                  | 4                      |
| Search                             | 8  | Present full electronic search strategy for at least one database, including any limits used, such that it could be repeated.                                                                                                                                                                               | Supplementary material |
| Study selection                    | 9  | State the process for selecting studies (i.e., screening, eligibility, included in systematic review, and, if applicable, included in the meta-analysis).                                                                                                                                                   | 5, 6                   |
| Data collection process            | 10 | Describe method of data extraction from reports (e.g., piloted forms, independently, in duplicate) and any processes for obtaining and confirming data from investigators.                                                                                                                                  | 5                      |
| Data items                         | 11 | List and define all variables for which data were sought (e.g., PICOS, funding sources) and any assumptions and simplifications made.                                                                                                                                                                       | 5                      |
| Risk of bias in individual studies | 12 | Describe methods used for assessing risk of bias of individual studies (including specification of whether this was done at the study or outcome level), and how this information is to be used in any data synthesis.                                                                                      | 6                      |
| Summary measures                   | 13 | State the principal summary measures (e.g., risk ratio, difference in means).                                                                                                                                                                                                                               | 6                      |
| Synthesis of results               | 14 | Describe the methods of handling data and combining results of studies, if done, including measures of consistency (e.g., $I^2$ ) for each meta-analysis.                                                                                                                                                   | 6                      |

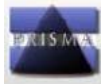

# PRISMA 2009 Checklist

Page 1 of 2

| Section/topic                 | #  | Checklist item                                                                                                                                                                                           | Reported on page #    |
|-------------------------------|----|----------------------------------------------------------------------------------------------------------------------------------------------------------------------------------------------------------|-----------------------|
| Risk of bias across studies   | 15 | Specify any assessment of risk of bias that may affect the cumulative evidence (e.g., publication bias, selective reporting within studies).                                                             | 6                     |
| Additional analyses           | 16 | Describe methods of additional analyses (e.g., sensitivity or subgroup analyses, meta-regression), if done, indicating which were pre-specified.                                                         | N/A                   |
| <b>RESULTS</b>                |    |                                                                                                                                                                                                          |                       |
| Study selection               | 17 | Give numbers of studies screened, assessed for eligibility, and included in the review, with reasons for exclusions at each stage, ideally with a flow diagram.                                          | 6, figure 1           |
| Study characteristics         | 18 | For each study, present characteristics for which data were extracted (e.g., study size, PICOS, follow-up period) and provide the citations.                                                             | 6                     |
| Risk of bias within studies   | 19 | Present data on risk of bias of each study and, if available, any outcome level assessment (see item 12).                                                                                                | Supplementary table 2 |
| Results of individual studies | 20 | For all outcomes considered (benefits or harms), present, for each study: (a) simple summary data for each intervention group (b) effect estimates and confidence intervals, ideally with a forest plot. | 17-33                 |
| Synthesis of results          | 21 | Present results of each meta-analysis done, including confidence intervals and measures of consistency.                                                                                                  | N/A                   |
| Risk of bias across studies   | 22 | Present results of any assessment of risk of bias across studies (see Item 15).                                                                                                                          | Supplementary table 2 |
| Additional analysis           | 23 | Give results of additional analyses, if done (e.g., sensitivity or subgroup analyses, meta-regression [see Item 16]).                                                                                    | N/A                   |
| <b>DISCUSSION</b>             |    |                                                                                                                                                                                                          |                       |
| Summary of evidence           | 24 | Summarize the main findings including the strength of evidence for each main outcome; consider their relevance to key groups (e.g., healthcare providers, users, and policy makers).                     | 33-35                 |
| Limitations                   | 25 | Discuss limitations at study and outcome level (e.g., risk of bias), and at review-level (e.g., incomplete retrieval of identified research, reporting bias).                                            | 35                    |
| Conclusions                   | 26 | Provide a general interpretation of the results in the context of other evidence, and implications for future research.                                                                                  | 35                    |
| <b>FUNDING</b>                |    |                                                                                                                                                                                                          |                       |
| Funding                       | 27 | Describe sources of funding for the systematic review and other support (e.g., supply of data); role of funders for the systematic review.                                                               | 35                    |

From: Moher D, Liberati A, Tetzlaff J, Altman DG, The PRISMA Group (2009). Preferred Reporting Items for Systematic Reviews and Meta-Analyses: The PRISMA Statement. PLoS Med 6(7): e1000097. doi:10.1371/journal.pmed1000097

For more information, visit: [www.prisma-statement.org](http://www.prisma-statement.org).

For peer review only - <http://bmjopen.bmj.com/site/about/guidelines.xhtml>

# BMJ Open

## A rapid systematic review of measures to protect older people in long term care facilities from COVID-19

|                                 |                                                                                                                                                                                                                                                                                  |
|---------------------------------|----------------------------------------------------------------------------------------------------------------------------------------------------------------------------------------------------------------------------------------------------------------------------------|
| Journal:                        | <i>BMJ Open</i>                                                                                                                                                                                                                                                                  |
| Manuscript ID                   | bmjopen-2020-047012.R2                                                                                                                                                                                                                                                           |
| Article Type:                   | Original research                                                                                                                                                                                                                                                                |
| Date Submitted by the Author:   | 18-Aug-2021                                                                                                                                                                                                                                                                      |
| Complete List of Authors:       | Frazer, Kate; University College Dublin<br>Mitchell, Lachlan; University College Dublin,<br>Stokes, Diarmuid; University College Dublin<br>Lacey, Ella; University College Dublin<br>Crowley, Eibhlin; University College Dublin<br>Kelleher, Cecily; University College Dublin, |
| <b>Primary Subject Heading</b>: | Public health                                                                                                                                                                                                                                                                    |
| Secondary Subject Heading:      | Global health, Health policy                                                                                                                                                                                                                                                     |
| Keywords:                       | COVID-19, Public health < INFECTIOUS DISEASES, GERIATRIC MEDICINE                                                                                                                                                                                                                |
|                                 |                                                                                                                                                                                                                                                                                  |

SCHOLARONE™  
Manuscripts



I, the Submitting Author has the right to grant and does grant on behalf of all authors of the Work (as defined in the below author licence), an exclusive licence and/or a non-exclusive licence for contributions from authors who are: i) UK Crown employees; ii) where BMJ has agreed a CC-BY licence shall apply, and/or iii) in accordance with the terms applicable for US Federal Government officers or employees acting as part of their official duties; on a worldwide, perpetual, irrevocable, royalty-free basis to BMJ Publishing Group Ltd ("BMJ") its licensees and where the relevant Journal is co-owned by BMJ to the co-owners of the Journal, to publish the Work in this journal and any other BMJ products and to exploit all rights, as set out in our [licence](#).

The Submitting Author accepts and understands that any supply made under these terms is made by BMJ to the Submitting Author unless you are acting as an employee on behalf of your employer or a postgraduate student of an affiliated institution which is paying any applicable article publishing charge ("APC") for Open Access articles. Where the Submitting Author wishes to make the Work available on an Open Access basis (and intends to pay the relevant APC), the terms of reuse of such Open Access shall be governed by a Creative Commons licence – details of these licences and which [Creative Commons](#) licence will apply to this Work are set out in our licence referred to above.

Other than as permitted in any relevant BMJ Author's Self Archiving Policies, I confirm this Work has not been accepted for publication elsewhere, is not being considered for publication elsewhere and does not duplicate material already published. I confirm all authors consent to publication of this Work and authorise the granting of this licence.

1 A rapid systematic review of measures to protect older people in long term care facilities from  
2 COVID-19

3 Kate Frazer<sup>1\*</sup>, Lachlan Mitchell<sup>2,3\*</sup>, Diarmuid Stokes<sup>4</sup>, Ella Lacey<sup>5</sup>, Eibhlin Crowley<sup>6</sup>, Cecily  
4 Kelleher<sup>2,3</sup>.

- 5 1. School of Nursing, Midwifery and Health Systems, University College Dublin, Belfield,  
6 Dublin 4, Ireland
- 7 2. National Nutrition Surveillance Centre, University College Dublin, Belfield, Dublin 4, Ireland
- 8 3. School of Public Health, Physiotherapy and Sport Science, University College Dublin,  
9 Belfield, Dublin 4, Ireland
- 10 4. Health Sciences Library, University College Dublin, Belfield, Dublin 4, Ireland
- 11 5. School of Medicine, University College Dublin, Belfield, Dublin 4, Ireland
- 12 6. Office for Health Affairs, College of Health and Agricultural Science, University College  
13 Dublin, Belfield, Dublin 4, Ireland

14 \*Equal contribution

15 Corresponding author: Lachlan Mitchell

16 [Lachlan.mitchell@ucd.ie](mailto:Lachlan.mitchell@ucd.ie)

17 National Nutrition Surveillance Centre, University College Dublin, Belfield, Dublin 4, Ireland

18 Running title: Measures to protect older people from COVID-19

19 Word count: 2873

20 Abstract word count: 265

21 Keywords: Coronavirus, COVID-19, nursing homes, transmission

22

23



**Abstract**

Objectives: The global COVID-19 pandemic produced large-scale health and economic complications. Older people and those with comorbidities are particularly vulnerable to this virus, with nursing homes and long term care facilities experiencing significant morbidity and mortality associated with COVID-19 outbreaks. The aim of this rapid systematic review was to investigate measures implemented in long term care facilities to reduce transmission of COVID-19 and their effect on morbidity and mortality of residents, staff, and visitors.

Setting: Long term care facilities.

Participants: Residents, staff and visitors of facilities.

Primary and secondary outcome measures: Databases (PubMed, EMBASE, CINAHL, Cochrane Databases and repositories and MedRxiv pre-published database) were systematically searched from inception to July 27 2020 to identify studies reporting assessment of interventions to reduce transmission of COVID-19 in nursing homes among residents, staff, or visitors. Outcome measures include facility characteristics, morbidity data, case fatalities, and transmission rates. Due to study quality and heterogeneity, no meta-analysis was conducted.

Results: The search yielded 1414 articles, with 38 studies included. Reported interventions include mass testing, use of personal protective equipment, symptom screening, visitor restrictions, hand hygiene and droplet/contact precautions, and resident cohorting. Prevalence rates ranged from 1.2-85.4% in residents and 0.6-62.6% in staff. Mortality rates ranged from 5.3-55.3% in residents.

Conclusions: Novel evidence in this review details the impact of facility size, availability of staff and practices of operating between multiple facilities, and for-profit status of facilities as factors contributing to the size and number of COVID-19 outbreaks. No causative relationships can be determined; however, this review provides evidence of interventions that reduce transmission of COVID-19 in long term care facilities.

Trial registration: The protocol is registered on PROSPERO (CRD42020191569).

1  
2  
3 49  
4  
56 50 **Strengths and Limitations of the Study**  
7

- 8  
9 51 • Evidence from 38 studies identifies the measures taken to reduce transmission of COVID-19  
10  
11 52 in long term care facilities.  
12  
13 53 • No limitations were placed on study type, and all languages were eligible for inclusion.  
14  
15 54 • Study quality was formally examined using the MMAT tool.  
16  
17 55 • Due to heterogeneity of included studies, meta-analysis was not able to be performed.  
18  
19

20 56  
21  
22  
23 57  
24  
25  
26 58  
27  
28  
29 59  
30  
31 60  
32  
33  
34 61  
35  
36  
37 62  
38  
39  
40 63  
41  
42 64  
43  
44  
45 65  
46  
47  
48 66  
49  
50  
51 67  
52  
53 68  
54  
55  
56 69  
57  
58  
59 70  
60

71

**72 Introduction**

73 Severe Acute Respiratory Syndrome Coronavirus-2 (SARS-CoV-2) is a novel virus, first identified in  
74 China in 2019, resulting in the current global pandemic in 2020.<sup>1</sup> The ensuing disease associated with  
75 infection from SARS-CoV-2, termed COVID-19, has produced large-scale public health and  
76 worldwide economic effects.<sup>2</sup>

77 The virus spreads between people through close contact and droplet transmission (coughs and  
78 sneezes). While most infected people will experience mild flu-like symptoms, others may become  
79 seriously ill and die.<sup>3</sup> At-risk groups include older people and those with underlying medical  
80 conditions, while men appear to have more susceptibility than women. Symptom severity varies;  
81 several individuals remain asymptomatic. Others experience fever, cough, sore throat, general  
82 weakness, and fatigue, while more severe respiratory illnesses and infections may result, which can be  
83 fatal.<sup>4,5</sup> Deterioration in clinical presentations can occur rapidly, leading to poorer health outcomes.  
84 Anosmia and ageusia are reported in evidence from South Korea, China, and Italy in patients with  
85 confirmed SARS-CoV-2 infection, in some cases in the absence of other symptoms.<sup>6</sup>

86 The World Health Organization (WHO) declared the COVID-19 outbreak constituted a Public Health  
87 Emergency of International Concern (PHEIC) on January 30, 2020.<sup>5</sup> Two primary goals of action  
88 were 1) to accelerate innovative research to help contain the spread and facilitate care for all affected,  
89 and 2) to support research priorities globally the learning from the pandemic response for  
90 preparedness. Globally, up to March 25, 2021, there are 123 636 852 cases of COVID-19 (following  
91 the applied case definitions and testing strategies in the affected countries) including 2 721 891  
92 deaths.<sup>7</sup> Within Europe, over 25 220 376 cases are reported, with 592 929 deaths.<sup>7</sup>

93 Given the infection and mortality figures noted, preventing and limiting transmission of the SARS-  
94 CoV-2 virus is advocated. International and national evidence mandates physical distancing, regular  
95 hand hygiene and cough etiquette, and limiting touching eyes, nose or mouth; in addition to regular  
96 cleaning of surfaces.<sup>8</sup>

1  
2  
3 97 As noted older people are an at-risk group for COVID-19, and throughout the pandemic, the impact  
4  
5 98 on this population has resulted in increased mortality, specifically those living in long term care  
6  
7 99 facilities (LTCF) where a high proportion of outbreaks with increased rates of morbidity and case  
8  
9 100 fatality in residents are recorded.<sup>9</sup> In several EU/EEA countries, LTCF deaths among residents,  
10  
11 101 associated with COVID-19, account for 37% to 66% of all COVID-19-related fatalities.<sup>9</sup> The specific  
12  
13 102 rationale for their increased susceptibility is less clear. Comorbidities including cardiovascular disease  
14  
15 103 and diabetes *may increase the chances of fatal disease, but they alone do not explain why age is an*  
16  
17 104 *independent risk factor.*<sup>10</sup> Molecular, biological, and immunological changes inform emergent viable  
18  
19 105 hypotheses.<sup>10</sup> The United Nations (UN) (2020) acknowledge that COVID-19 exposes the inequalities  
20  
21 106 in society and the failures expressed in the 2030 Agenda for Sustainable Development. The UN report  
22  
23 107 the disproportionate fatality rates in those aged over 80 years as five times the global average<sup>11</sup> and  
24  
25 108 suggest a need for a more *inclusive, equitable and age-friendly society, anchored in human rights*  
26  
27 109 (p.16).<sup>12</sup>

30  
31 110 The aim of this rapid review of the literature was to assess the extent to which measures implemented  
32  
33 111 in LTCF reduced transmission of COVID-19 (SARS-CoV-2) among residents, staff, and visitors, and  
34  
35 112 the effect of these measures on morbidity and mortality outcomes.

### 37 38 113 **Methods**

39  
40  
41 114 The protocol is registered on PROSPERO (CRD42020191569)<sup>13</sup> and reporting follows PRISMA  
42  
43 115 guidelines.<sup>14</sup> Ethical approval was not required for this systematic review.

#### 44 45 116 *Search strategy*

46  
47  
48 117 Search strategies comprised search terms both for keywords and controlled-vocabulary search terms  
49  
50 118 MESH and Emtree (see Supplementary Table 1 for full search terms). EMBASE (via OVID),  
51  
52 119 PubMed (via OVID), Cumulative Index to Nursing and Allied Health Literature (CINAHL),  
53  
54 120 Cochrane Database and Repository, and MedRxiv pre-published databases were searched. No time  
55  
56 121 limits were imposed, and databases were searched up to July 27, 2020. Reference lists of included  
57  
58 122 evidence were checked for further articles.

1  
2  
3 123 *Eligibility criteria*  
4  
5

6 124 All study designs (experimental, observational, and qualitative) are included, and no exclusions  
7  
8 125 placed on language. Included studies report an assessment of measures to reduce transmission of  
9  
10 126 COVID-19 (including SARS or MERS) in residents, employees, or visitors of LTCF. To provide as  
11  
12 127 comprehensive a review of the evidence we included any intervention implemented to reduce the  
13  
14 128 transmission of COVID-19 in LTCF, including facility measures, social distancing, use of personal  
15  
16 129 protective equipment, and hand hygiene.

17  
18  
19 130 A broad definition of LTCF was adopted for this review noting ECDC guidance<sup>8</sup> including  
20  
21 131 institutions such as nursing homes, skilled nursing facilities, retirement homes, assisted-living  
22  
23 132 facilities, residential care homes or other facilities providing care in a congregated setting for older  
24  
25 133 aged adults.

26  
27  
28 134 *Primary outcome measures*  
29

30  
31 135 Primary outcome measures are morbidity data, case fatality rates, and reductions in reported  
32  
33 136 transmission rates.

34  
35  
36 137 *Secondary outcomes*  
37

38  
39 138 Secondary outcomes reported are facility characteristics associated with COVID-19 transmission.  
40

41 139 *Selection of studies and data extraction*  
42

43  
44 140 Two authors developed search strings (DS & KF); all database searches were completed by one  
45  
46 141 author (DS) (Supplementary Table 1). Following de-duplication, references were uploaded into  
47  
48 142 Covidence management platform (LM), and two authors independently screened all titles and  
49  
50 143 abstracts (LM & KF). Full texts of all potentially eligible studies were independently reviewed by two  
51  
52 144 authors (LM & KF). Disagreements were resolved by discussion with a third author (CK). Data from  
53  
54 145 included studies were independently extracted in duplicate (LM & KF). A data extraction form was  
55  
56 146 developed and modified from documents used previously by authors (KF & CK). Extracted data  
57  
58 147 included study characteristics (title, lead author, year of publication, country, study setting, study  
59  
60

1  
2  
3 148 design), description of the intervention, number and characteristics of participants, outcomes, duration  
4  
5 149 of follow-up, sources of funding, peer review status). Study design (required for review of quality)  
6  
7 150 was independently assessed by two authors (LM & KF), with disagreements resolved by a third  
8  
9 151 author (CK).

### 12 152 *Assessment of Quality*

15 153 Two review authors (LM & EL) independently assessed the quality of included studies using Mixed  
16  
17 154 Methods Assessment Tool (MMAT),<sup>15</sup> with disagreements resolved by a third author (KF) and  
18  
19 155 discussed with the lead author (CK) (Supplementary Table 2). The MMAT is used widely and  
20  
21 156 considered a valid indicator of methodological quality using instruments for non-randomised and  
22  
23 157 descriptive studies.

### 26 158 *Data synthesis*

29 159 Meta-analysis was not possible due to heterogeneity in study designs, participants, outcomes, and  
30  
31 160 nature of the interventions and no attempt was made to transform statistical data. The SWiM criteria<sup>16</sup>  
32  
33 161 guide a narrative summary, with data presented in tabular format and subgroup reporting of  
34  
35 162 population groups.

### 38 163 *Patient and public involvement*

41 164 No patients were involved in this study.

## 44 165 **Results**

46 166 We identified 1414 articles, and 131 full-text articles were selected for review. After an evaluation  
47  
48 167 against our inclusion criteria, 38 studies (40 papers) are included in this systematic review (Figure 1).

### 51 168 *Study characteristics*

54 169 Geographically we report evidence from eleven countries; the majority (20 studies) are from USA<sup>17-36</sup>  
55  
56 170 and UK.<sup>37-41</sup> We report evidence from Canada,<sup>42-44</sup> France,<sup>45 46</sup> Hong Kong,<sup>47 48</sup> Belgium,<sup>49</sup> Germany,<sup>50</sup>  
57  
58 171 Ireland,<sup>51</sup> Japan,<sup>52</sup> Korea,<sup>53</sup> and Spain<sup>54</sup> (Table 1).

1  
2  
3 172 *Infection control measures*  
4  
5

6 173 Twenty studies report the nature of LTCFs related to outbreaks and transmission of COVID-19  
7  
8 174 infection (Table 2; <sup>17 24 29 30 32 34 36-40 42-44 46-48 51-53</sup>). Thirty studies (Table 3a; <sup>18-30 33-35 38-44 46-51 54</sup>) report  
9  
10 175 evidence of measures to reduce transmission of COVID-19 in long-term residential care facilities for  
11  
12 176 residents, 25 studies (Table 3b; <sup>18-23 25 27-31 33 35 39 40 43-49 51 54</sup>) report evidence for employee outcomes,  
13  
14 177 and two studies report evidence for visitors (Table 3c; <sup>29 48</sup>).

15  
16  
17 178 A variety of infection control measures are described (Tables 1 and 3a-c) including: mass  
18  
19 179 testing/point-prevalence testing (22 studies; <sup>18 20-23 26-31 33-35 39 40 45 46 49-51 54</sup>), use of personal protective  
20  
21 180 equipment (10 studies; <sup>18 19 21 26 29 30 33 46 48 50</sup>), screening of residents, staff, or visitors for symptoms (8  
22  
23 181 studies; <sup>19-21 24 26 28 30 33</sup>), restrictions on visitor entry (10 studies; <sup>19-21 26 28 30 33 46 50 54</sup>), hand hygiene and  
24  
25 182 contact and droplet precautions (6 studies; <sup>20 24 26 33 46 47</sup>), and cohorting/isolation of residents (11  
26  
27 183 studies; <sup>20 21 23 26 29 30 33 34 46 48 50</sup>). Thirteen studies examined characteristics of LTCF and their  
28  
29 184 association with COVID-19 infection and risk <sup>17 25 32 36-38 40-44 52 53</sup>.

Table 1. Characteristics of studies including infection control measures

| Study ID                                   | Country                      | Study Design           | Setting                  | Population                                                                                                                                  | Intervention/infection control strategy                                                                                                                                                   | Outcome groups   | Primary outcome measure                                            | Secondary outcome                                                                           |
|--------------------------------------------|------------------------------|------------------------|--------------------------|---------------------------------------------------------------------------------------------------------------------------------------------|-------------------------------------------------------------------------------------------------------------------------------------------------------------------------------------------|------------------|--------------------------------------------------------------------|---------------------------------------------------------------------------------------------|
| Abrams et al. (2020) <sup>17</sup>         | USA                          | Cross sectional        | Nursing homes            | Nursing homes across 30 USA States (n=9395 nursing homes). N=6446 facilities without COVID-19 cases; n=2949 facilities with COVID-19 cases. | Nursing homes characteristics associated with COVID-19 outbreaks                                                                                                                          | Facilities       | Prevalence of COVID-19                                             | Estimates on the relationship of nursing home characteristics and documented COVID-19 cases |
| Arons et al. (2020) <sup>18</sup>          | USA, King County, Washington | Cross sectional cohort | Nursing home facility    | Residents N=89<br>N=76 participated in point-prevalence testing.                                                                            | PPE (eye protection, gown, gloves, face masks); mass testing.                                                                                                                             | Residents, staff | COVID-19 prevalence, testing, symptoms, hospitalization, mortality |                                                                                             |
| Blackman et al. (2020) <sup>19</sup>       | USA                          | Cross sectional        | Skilled nursing facility | A 150-bedded skilled nursing facility. Single story building with four units.                                                               | Employee and visitor screening on entry; visitor restrictions; review of PPE and infection control in the building; use of heat maps in a facility to track staff and residents' symptoms | Residents, staff | COVID-19 prevalence, testing, mortality                            |                                                                                             |
| Borras-Bermejo et al. (2020) <sup>54</sup> | Spain                        | Cross sectional cohort | Nursing homes            | N=69 nursing homes in Barcelona.<br>N=3214 residents and N=2655 staff                                                                       | Surveillance testing program for COVID-19 in nursing homes; introduction of restrictions for visitors                                                                                     | Residents, staff | COVID-19 prevalence, testing, symptoms                             |                                                                                             |



|                                         |                                              |                        |                                                        |                                                                                                                                                       |                                                                                                                                                                                                               |                                  |                                                                                         |                                                         |
|-----------------------------------------|----------------------------------------------|------------------------|--------------------------------------------------------|-------------------------------------------------------------------------------------------------------------------------------------------------------|---------------------------------------------------------------------------------------------------------------------------------------------------------------------------------------------------------------|----------------------------------|-----------------------------------------------------------------------------------------|---------------------------------------------------------|
| Brainard et al. (2020) <sup>37</sup>    | England, Norfolk                             | Retrospective cohort   | Care homes                                             | N=248 care homes                                                                                                                                      | Statistical modelling assessing detection of COVID-19 infection relative to PPE availability and impact of staffing by non-care workers                                                                       | Facilities                       | Descriptive data and statistical modelling for COVID-19, staffing levels, access to PPE |                                                         |
| Brown et al. (2020) <sup>42</sup>       | Canada, Ontario                              | Retrospective cohort   | Nursing homes                                          | N=623 nursing homes. N=78,607 residents                                                                                                               | Impact of home crowding on COVID-19 infection and mortality using nursing home crowding index score                                                                                                           | Residents, facilities            | COVID-19 incidence, modelling mortality                                                 | Facility characteristics, overcrowding and transmission |
| Burton et al. (2020) <sup>40</sup>      | Scotland                                     | Cross sectional cohort | Nursing homes                                          | N=189 nursing homes included and data for 109 homes (57.7%) for older people reported, representing 5227 beds (89.5% of total beds in 189 care homes) | Surveillance data to understand the evolution of COVID-19 following outbreaks and care home characteristics in one health board                                                                               | Facilities, residents            | COVID-19 outbreaks, mortality,                                                          | Facility characteristics associated with transmission   |
| Dora et al. (2020) <sup>20</sup>        | USA, California                              | Cross sectional        | Veterans Affairs Greater Los Angeles Healthcare System | N=3 skilled nursing facilities (n=150 long term beds)<br>N=99 residents (95% male, age range 50 to 100 years)<br>N=136 staff<br>Visitors              | Three point-prevalence surveys; visitor restrictions (initially all visitors screened, then no visitors permitted into buildings); staff screening; hand hygiene, droplet, and contact precautions; cohorting | Residents, staff                 | COVID-19 prevalence, symptoms, mortality                                                |                                                         |
| Dutey-Magni et al. (2020) <sup>39</sup> | UK (England, Scotland, and Northern Ireland) | Cohort                 | Long term care facilities                              | N=8713 resident's health records<br>Daily counts of infection in 9339 residents and for 11604 staff across 179 LTCF.                                  | The home testing program introduced for all staff and residents in Four Seasons Healthcare Group (representing 9% of all long-term care beds). All tested at least once.                                      | Residents, staff, and facilities | Cumulative incidence of COVID-19, Kaplan-Meier estimates mortality and symptoms.        |                                                         |

|                                    |                 |                        |                           |                                                                                                                                                                                                                                                                                                                                                              |                                                                                                                                         |                              |                                                                                                                                                                                   |  |
|------------------------------------|-----------------|------------------------|---------------------------|--------------------------------------------------------------------------------------------------------------------------------------------------------------------------------------------------------------------------------------------------------------------------------------------------------------------------------------------------------------|-----------------------------------------------------------------------------------------------------------------------------------------|------------------------------|-----------------------------------------------------------------------------------------------------------------------------------------------------------------------------------|--|
| Eckardt et al (2020) <sup>21</sup> | USA, Florida    | Cross sectional cohort | Long term care            | 120-bedded long-term care facility.                                                                                                                                                                                                                                                                                                                          | PPE; staff and visitor screening; visitor restrictions; distancing of residents; cohorting exposed residents; point-prevalence testing. | Residents, staff             | COVID-19 prevalence                                                                                                                                                               |  |
| Feaster & Goh (2020) <sup>22</sup> | USA, Pasadena   | Cross sectional cohort | Long term care homes      | Residents and staff (n=1093) of LTCF (n=9) N=608 residents (age 78 ± 13.3 years; n=332 female) N=485 staff (age 41.8 ± 13.3 years; n=249 female)                                                                                                                                                                                                             | Mass surveillance testing                                                                                                               | Residents, staff             | COVID-19 prevalence, symptoms                                                                                                                                                     |  |
| Fisman et al. (2020) <sup>43</sup> | Canada, Ontario | Cohort                 | Long term care facilities | N=269 total individuals who died of COVID-19 in Ontario to April 11, 2020, and n=83 individuals who died of COVID-19 in Ontario LTCF to April 7, 2020. Denominators not available for long-term care residents approximated as the total number of long-term care facility beds in Ontario (79 498), assuming complete occupancy. Median beds 120 [9 to 543] | Surveillance data analysed to evaluate the risk of death and identification of risk factors for prevention strategies                   | Residents, staff, facilities | COVID-19-specific mortality incidence rate ratios (IRRs) of long term care residents were calculated with community-living Ontarians older than 69 years as the comparator group. |  |

|                                    |                |                        |                                       |                                                                                                          |                                                                                                                                                                                                                                                                                                                                                        |                       |                                                                                                                                       |
|------------------------------------|----------------|------------------------|---------------------------------------|----------------------------------------------------------------------------------------------------------|--------------------------------------------------------------------------------------------------------------------------------------------------------------------------------------------------------------------------------------------------------------------------------------------------------------------------------------------------------|-----------------------|---------------------------------------------------------------------------------------------------------------------------------------|
| Graham et al. (2020) <sup>23</sup> | England        | Cross sectional cohort | Four nursing homes in London, England | N=4 nursing homes. N=394 residents (37.6% male, median age 83 years [IQR 15], 75.4% white) N=596 staff.  | Mass surveillance testing; isolation of infected residents                                                                                                                                                                                                                                                                                             | Residents, staff      | COVID-19 prevalence, symptoms, mortality. Multivariable logistic regression of presenting symptoms in those who had an available test |
| Guery et al (2020) <sup>45</sup>   | France, Nantes | Cross sectional cohort | Nursing home                          | N=136 staff (age 39 years [IQR 27-48.5], n=112 female)                                                   | Surveillance testing of staff following confirmed index case                                                                                                                                                                                                                                                                                           | Staff                 | COVID-19 prevalence, symptoms                                                                                                         |
| Hand et al. (2018) <sup>24</sup>   | USA, Louisiana | Cross sectional cohort | Long term care facility               | Long term care facility provides services for up to 130 residents: report on 20 resident cases           | Outbreak surveillance after 20 cases reported. Adherence to standard droplet precautions for symptomatic residents                                                                                                                                                                                                                                     | Residents, facilities | Prevalence of Coronavirus NL63 symptoms, hospitalizations, mortality                                                                  |
| Harris et al. (2020) <sup>25</sup> | USA, Virginia  | Cross sectional cohort | Long term care facility               | N=41 of 48 residents (median age 75 years [44-104], 52.1% female (25/48). 60.4% White (29/48)) N=7 staff | Following an outbreak, response developed for the management of residents and the use of telemedicine. Early identification of residents for escalation of care; monitoring and treating patients safe to remain in a facility; care coordination - bidirectional; daily needs assessment related to technology, infection control and staff wellbeing | Residents, staff      | COVID-19 prevalence, mortalities, comorbidities, telemedicine consultations                                                           |

1  
2  
3  
4  
5  
6  
7  
8  
9  
10  
11  
12  
13  
14  
15  
16  
17  
18  
19  
20  
21  
22  
23  
24  
25  
26  
27  
28  
29  
30  
31  
32  
33  
34  
35  
36  
37  
38  
39  
40  
41  
42  
43  
44  
45  
46

|                                                                                                 |                                     |           |                        |                                                                                          |                                                                                                                                                                                                                                                                                                                       |                                                                                                                                                                             |                                        |                                                                                                     |  |
|-------------------------------------------------------------------------------------------------|-------------------------------------|-----------|------------------------|------------------------------------------------------------------------------------------|-----------------------------------------------------------------------------------------------------------------------------------------------------------------------------------------------------------------------------------------------------------------------------------------------------------------------|-----------------------------------------------------------------------------------------------------------------------------------------------------------------------------|----------------------------------------|-----------------------------------------------------------------------------------------------------|--|
| 1<br>2<br>3<br>4<br>5<br>6<br>7<br>8<br>9<br>10<br>11<br>12<br>13<br>14<br>15<br>16<br>17<br>18 | Heung et al (2006) <sup>47</sup>    | Hong Kong | Cross sectional cohort | Residential care home                                                                    | N=90 residents<br>N=32 staff<br>N=67/90 residents participated; n=7 (10%) aged 65 -75 years, n=32 (48%) 76-85 years, n=28 (42%) >85 years; n=53 (79%) females.<br>Staff 26/32 participated; n=18 (69%) aged 31-50 years, n=8 (31%) >50 years; 85% females; 54% nursing care role, 46% assistance in daily activities. | Surveillance screening in a residential care home with the introduction of infection control precautions: droplet and contact precautions                                   | Resident, staff, facilities            | Seroprevalence of SARS-CoV antibodies. Symptoms, transmission, and mortality                        |  |
| 19<br>20<br>21<br>22<br>23<br>24<br>25<br>26                                                    | Ho et al. (2004) <sup>48</sup>      | Hong Kong | Cross sectional cohort | Nursing home                                                                             | N=7 residents, staff, visitors in one nursing home (n=4 females aged in their 60s to 90s; n=3 males aged in their 20s to 80s)                                                                                                                                                                                         | Proposed intervention for future management. Community-based outreach teams led by geriatricians, nurses to closely monitor nursing home residents discharged from hospital | Residents, staff, visitors, facilities | Descriptive data on seven cases, the onset of illness, transmission and outcome including mortality |  |
| 27<br>28<br>29<br>30<br>31<br>32                                                                | Hoxha et al. (2020) <sup>49</sup>   | Belgium   | Cross sectional cohort | Long Term Care Facilities                                                                | Reporting for 2074 of 2500 invited facilities; 280,427 COVID-19 tests. 51% residents (N=142,100) and 49% staff (N=138,327)                                                                                                                                                                                            | Mass testing                                                                                                                                                                | Residents and staff                    | COVID-19 prevalence, symptoms, characteristics associated with positive test outcome                |  |
| 33<br>34<br>35<br>36<br>37<br>38<br>39<br>40<br>41<br>42<br>43<br>44<br>45<br>46                | Iritani et al. (2020) <sup>52</sup> | Japan     | Cross sectional cohort | Across long term care hospitals/facilities, general medical/welfare facilities, and non- | 381 clusters with 3786 infected cases accounting for 23.9% of 15,852 cases                                                                                                                                                                                                                                            | Following government recommendation suspension or restricting temporary use of LTCF in areas where infection prevalent                                                      | Facilities                             | Descriptive data on clusters reported, mortality data                                               |  |

|                                      |                              |                        |                                         |                                                                                                                                       |                                                                                                                                                     |                              |                                                                        |                                                                  |
|--------------------------------------|------------------------------|------------------------|-----------------------------------------|---------------------------------------------------------------------------------------------------------------------------------------|-----------------------------------------------------------------------------------------------------------------------------------------------------|------------------------------|------------------------------------------------------------------------|------------------------------------------------------------------|
|                                      |                              |                        | medical/welfare facilities              |                                                                                                                                       |                                                                                                                                                     |                              |                                                                        |                                                                  |
| Kennelly et al. (2020) <sup>51</sup> | Ireland                      | Cross sectional cohort | Nursing homes                           | Nursing home residents in three community health organizations in Ireland (N=28 nursing homes). Represents 2043 residents & 2303 beds | Mass surveillance testing; post testing program                                                                                                     | Staff, residents, facilities | COVID-19 prevalence, symptoms, clinical outcomes, including mortality. | Characteristics of facilities associated with transmission.      |
| Kim (2020) <sup>53</sup>             | Korea (South)                | Cross sectional cohort | Nursing home                            | N=142 nursing home residents<br>N=85 health care workers and caregivers working in one facility                                       | Procedures identified to reduce transmission of COVID-19 following confirmed case in a staff member                                                 | Facilities                   |                                                                        | Data on the preparedness of the facility to reduce transmission. |
| Kimball et al. (2020) <sup>26</sup>  | USA, King County, Washington | Cross sectional cohort | Long-Term Care Skilled Nursing Facility | Nursing home. N=82 residents; 76/82 (92.7%) underwent symptom assessment and testing; three (3.7%) refused testing                    | Surveillance testing; PPE; hand hygiene; visitor restrictions; staff screening; daily resident symptom assessments; isolation of positive residents | Residents                    | COVID-19 prevalence and symptoms                                       |                                                                  |
| Klein et al (2020) <sup>52</sup>     | Germany, Hamburg             | Cross sectional        | Residential care facility               | N=60 resident and report from eight deceased residents.                                                                               | Mass testing; PPE; resident cohorting; visitor restrictions                                                                                         | Residents                    | COVID-19 prevalence and symptoms, management                           |                                                                  |

|                                        |                              |                        |                                                                   |                                                                                                                                                                                                                                                                               |                                                                                                                                                                                     |                                        |                                                                        |
|----------------------------------------|------------------------------|------------------------|-------------------------------------------------------------------|-------------------------------------------------------------------------------------------------------------------------------------------------------------------------------------------------------------------------------------------------------------------------------|-------------------------------------------------------------------------------------------------------------------------------------------------------------------------------------|----------------------------------------|------------------------------------------------------------------------|
| Lennon et al. (2020) <sup>27</sup>     | USA, Massachusetts           | Cross sectional cohort | Skilled facilities, nursing homes and assisted living facilities  | N=366 skilled nursing facilities<br>N=32,480 residents and staff tested once, and 6.7% tested subsequently.<br>N=16,966 residents (mean age 82 ± 13; 65% female).<br>N=15,514 staff (mean age 45 ± 15; 76% female).                                                           | Mass testing and recording of symptoms, comparison of viral levels                                                                                                                  | Residents, staff                       | COVID-19 prevalence, symptoms                                          |
| Louie et al. (2020) <sup>28</sup>      | USA, San Francisco           | Cohort                 | Three skilled nursing facilities and one assisted living facility | N=431 residents and staff tested as part of initial surveillance.<br>Follow up testing of n=303 asymptomatic cases.                                                                                                                                                           | Mass surveillance testing; restrictions on visitors & non-essential staff; increased monitoring/screening of people entering/residing in a facility                                 | Residents, staff                       | COVID-19 prevalence, hospitalizations, fatalities, management          |
| McMichael et al. (2020) <sup>a29</sup> | USA, King County, Washington | Cross sectional cohort | Skilled Nursing Facility                                          | N=167<br>N=101 residents (median aged 83 (51-100), n=32 (31.7%) male, n=69 (68.3%) female).<br>N=50 health care personnel (median age 43.5 (21-79), n=12 (24%) males, n=38 (76%) female).<br>N=16 visitors (median age 72.5 (52-88), n=11 (68.7%) male, n=5 (31.2%) females). | Mass surveillance testing; contact tracing; quarantine of exposed persons; isolation of confirmed and suspected cases; on-site enhancement of PPE/infection prevention and control. | Residents, staff, visitors, facilities | COVID-19 prevalence, symptoms, mortality, hospitalizations, management |

1  
2  
3  
4  
5  
6  
7  
8  
9  
10  
11  
12  
13  
14  
15  
16  
17  
18  
19  
20  
21  
22  
23  
24  
25  
26  
27  
28  
29  
30  
31  
32  
33  
34  
35  
36  
37  
38  
39  
40  
41  
42  
43  
44  
45  
46

|                                                     |                |                        |                                                                             |                                                                                                                                                                      |                                                                                                               |                              |                                                                                     |                                                                                |
|-----------------------------------------------------|----------------|------------------------|-----------------------------------------------------------------------------|----------------------------------------------------------------------------------------------------------------------------------------------------------------------|---------------------------------------------------------------------------------------------------------------|------------------------------|-------------------------------------------------------------------------------------|--------------------------------------------------------------------------------|
| Office for National Statistics (2020) <sup>40</sup> | England        | Cross sectional cohort | Care homes providing care for older residents and those with dementia only. | N=9081 care homes for people aged 65 years and older - representing 292,301 residents (95% CI 293,168 to 293,434) and 441,498 staff. N=5126 homes participated (56%) | Prevalence of COVID-19 in residents and staff. Factors associated with higher levels of infection.            | Residents, staff, facilities | COVID-19 prevalence in residents aged 65 years and older and employees.             |                                                                                |
| Patel et al. (2020) <sup>30</sup>                   | USA, Illinois  | Cross sectional cohort | Nursing home (150 bedded unit)                                              | N=127 residents. 9% (n=11) single occupancy rooms, 91% (n=116) double occupancy rooms.                                                                               | Mass surveillance testing; screening of staff and visitors; visitor restrictions; cohorting of residents; PPE | Residents, staff, facilities | COVID-19 prevalence, symptoms, hospitalizations and survival rates, management      |                                                                                |
| Quicke et al. (2020) <sup>31</sup>                  | USA, Colorado  | Longitudinal cohort    | Five skilled nursing facilities                                             | N=454 staff                                                                                                                                                          | Weekly surveillance nasopharyngeal swabs tests were collected.                                                | Staff                        | COVID-19 prevalence and incidence, symptoms and information on genomic epidemiology |                                                                                |
| Quigley et al (2020) <sup>32</sup>                  | USA, 29 States | Cross sectional cohort | Nursing homes                                                               | N=56 nursing homes from 29 States: Midwest (30%), West (25%), Northeast (23%), South (22%).                                                                          | Reported on preparedness for COVID-19, testing, supplies and staffing levels                                  | Facilities                   |                                                                                     | Preparedness of nursing home facilities during COVID-19 to reduce transmission |

|                                    |                          |                        |                                        |                                                                                                                                                                                                                                                                     |                                                                                                                        |                              |                                                                                                                              |  |
|------------------------------------|--------------------------|------------------------|----------------------------------------|---------------------------------------------------------------------------------------------------------------------------------------------------------------------------------------------------------------------------------------------------------------------|------------------------------------------------------------------------------------------------------------------------|------------------------------|------------------------------------------------------------------------------------------------------------------------------|--|
| Roxby et al. (2020) <sup>33</sup>  | USA, Seattle, Washington | Cross sectional cohort | Assisted living community older adults | Older aged residents and staff in an assisted living community.<br>N=80 residents (mean age 86 years (range, 69-102); n=62 (77%) female).<br>N=62 staff (mean age 40.0 ± 15; n=42 (68%) female).<br>N=83 private apartments, n=45 independent, n=38 assisted living | Mass testing; resident cohorting/isolation; PPE; staff screening; visitor screening; additional hand hygiene stations. | Residents, staff             | COVID-19 prevalence and symptoms                                                                                             |  |
| Sacco et al (2020) <sup>46</sup>   | France, Maine-et-Loire   | Cross sectional cohort | Nursing home                           | N=87 residents (age 87.9 ± 7.2; 71% female)<br>N=92 staff (age 38.3 ± 11.7; 89% female)                                                                                                                                                                             | Mass testing; PPE; visitor restrictions; hand hygiene; resident isolation                                              | Residents, staff, facilities | COVID-19 prevalence and case-fatality rates. Resident's clinical signs and symptoms obtained from retrospective chart audit. |  |
| Sanchez et al (2020) <sup>34</sup> | USA, Detroit             | Time series cohort     | Skilled Nursing Facilities             | N=26 skilled nursing facilities<br>N=2773 residents' tests reported at baseline (median age 72 years [IQR 64-82 years]);<br>n=2218 1st follow up;<br>n=637 2nd follow up                                                                                            | Two point-prevalence surveys; follow up in 12 facilities following PPE guidelines; resident cohorting                  | Residents, facilities        | COVID-19 prevalence, hospitalizations, and deaths pre and post introduction of testing                                       |  |



|                                                                                                             |                                     |                                         |                               |                                                           |                                                                                                                                                                                                                                |                                                                                                                                                                                                   |                                  |                                                                                                                                                                                                                                                                                                                                                          |                                                                                                                                   |
|-------------------------------------------------------------------------------------------------------------|-------------------------------------|-----------------------------------------|-------------------------------|-----------------------------------------------------------|--------------------------------------------------------------------------------------------------------------------------------------------------------------------------------------------------------------------------------|---------------------------------------------------------------------------------------------------------------------------------------------------------------------------------------------------|----------------------------------|----------------------------------------------------------------------------------------------------------------------------------------------------------------------------------------------------------------------------------------------------------------------------------------------------------------------------------------------------------|-----------------------------------------------------------------------------------------------------------------------------------|
| 1<br>2<br>3<br>4<br>5<br>6<br>7<br>8<br>9<br>10<br>11<br>12<br>13<br>14<br>15<br>16<br>17<br>18<br>19<br>20 | Stall (2020) <sup>44</sup>          | Canada, Ontario                         | Retrospective cohort          | Nursing homes                                             | N=623 nursing homes (n=75,676 residents); 360/623 (57.7%) for-profit homes, 162/623 (26.0%) non-profit, 101/623 (16.2%) municipal homes. Mean number residents: n=113.2 (for profit); n=119.6 (non-profit); n=101 (municipal). | Impact of profit status at the level of a home rather than a resident. Using data from the Ontario Ministries of Health and Long-Term Care as part of the province's emergency "modelling table." | Facilities, residents, and staff | Descriptive data on outbreaks and mortality rate. Nursing home COVID-19 outbreaks (at least one resident case), COVID-19 outbreak sizes (total number of confirmed resident cases amongst homes with outbreaks), and the total number of COVID-19 resident deaths (amongst homes with outbreaks). Outbreaks in staff reported. Death rates for residents | Facility characteristics including nursing home profit status (for profit, non-profit, or municipal) associated with transmission |
| 21<br>22<br>23<br>24<br>25<br>26<br>27<br>28<br>29<br>30<br>31<br>32<br>33<br>34                            | Stow (2020) <sup>41</sup>           | England                                 | Longitudinal ecological study | Care home units from 46 local authority areas in England. | N=460 care home units<br>N=6,464 residents                                                                                                                                                                                     | Use of National Early Warning Score (NEWS) for identification of at-risk/surveillance to reduce mortality                                                                                         | Residents                        | Descriptive data NEWS surveillance on reducing mortality. Time-series comparison with Office for National Statistics weekly reported registered deaths of care home residents and COVID-19 was the underlying cause of death, and all other deaths (excluding COVID-19) up to 10/05/2020.                                                                |                                                                                                                                   |
| 35<br>36<br>37<br>38<br>39<br>40<br>41<br>42<br>43<br>44<br>45<br>46                                        | Telford et al. (2020) <sup>35</sup> | USA State of Georgia (Fulton County and | Cross sectional cohort        | Nursing homes                                             | N=28 nursing homes. N=5671 participants; n=2868 (50.6%) residents, n=2803 (49.4%) staff.                                                                                                                                       | Mass surveillance testing of staff and residents                                                                                                                                                  | Residents, staff                 | COVID-19 prevalence, hospitalizations, and deaths.                                                                                                                                                                                                                                                                                                       |                                                                                                                                   |

|                                   |                                              |            |                                    |                                |                                                              |            |                                                                                                                                   |  |
|-----------------------------------|----------------------------------------------|------------|------------------------------------|--------------------------------|--------------------------------------------------------------|------------|-----------------------------------------------------------------------------------------------------------------------------------|--|
|                                   | City of Atlanta)                             |            |                                    |                                |                                                              |            |                                                                                                                                   |  |
| Unruh et al. (2020) <sup>36</sup> | USA States New Jersey, New York, Connecticut | Case study | Nursing homes with $\geq 100$ beds | N=1162 nursing home facilities | Nursing home characteristics associated with mortality rates | Facilities | Mortality data. Predicted probabilities with Logistic Regression, Independent variables compared on characteristics of facilities |  |

Study setting is presented as defined in original study. PPE, personal protective equipment; LTCF, long term care facilities; IQR, inter quartile range; NEWS, national early warning score.

Table 2. COVID-19 outcomes related to the nature of long term care facilities.

| Study                              | Facilities | Outcomes                                                                                                                                                                                                                                                                                                                                                                                                                                                                                                                                                                                                                                                                                                                                                                                         |
|------------------------------------|------------|--------------------------------------------------------------------------------------------------------------------------------------------------------------------------------------------------------------------------------------------------------------------------------------------------------------------------------------------------------------------------------------------------------------------------------------------------------------------------------------------------------------------------------------------------------------------------------------------------------------------------------------------------------------------------------------------------------------------------------------------------------------------------------------------------|
| Abrams et al. (2020) <sup>17</sup> | Facilities | <p>Average number of cases was 19.8 (range 1 to 256). New Jersey (88.6%, OR 7.16) and Massachusetts (78.0%, OR 4.36) had a higher number of affected facilities.</p> <p>Probability of having a COVID-19 case:<br/>           Facility size (relative to small): Large OR=6.52; Medium OR=2.63<br/>           Location (relative to rural): Urban OR=3.22<br/>           % African American residents (relative to low %): Greater % OR=2.05<br/>           Nursing home chain status (relative to non-chain status): Chain status OR=0.89<br/>           State were significantly related to the probability of having COVID case</p> <p>Outbreak size associations:<br/>           Facility size (relative to small facility size): Large= -15.88; medium= -10.8 (percentage point change)</p> |

|                                         |            |                                                                                                                                                                                                                                                                                                                                                                                                                                                                                                                                                                                                                                                                                                                                                                                                                                                                                                                                                                                                 |
|-----------------------------------------|------------|-------------------------------------------------------------------------------------------------------------------------------------------------------------------------------------------------------------------------------------------------------------------------------------------------------------------------------------------------------------------------------------------------------------------------------------------------------------------------------------------------------------------------------------------------------------------------------------------------------------------------------------------------------------------------------------------------------------------------------------------------------------------------------------------------------------------------------------------------------------------------------------------------------------------------------------------------------------------------------------------------|
|                                         |            | For-profit status (relative to non-profit status) =1.88 State.                                                                                                                                                                                                                                                                                                                                                                                                                                                                                                                                                                                                                                                                                                                                                                                                                                                                                                                                  |
|                                         |            | Medicaid dependency, ownership, five-star rating, and prior infection violation were not significantly related to COVID-19 cases.                                                                                                                                                                                                                                                                                                                                                                                                                                                                                                                                                                                                                                                                                                                                                                                                                                                               |
| Brainard et al. (2020) <sup>37</sup>    | Facilities | Risk of infection:<br>Facility employee numbers (relative to <10 workers): 11-20 non-care workers HR = 6.502 (95%CI 2.614 -16.17); 21-30 non-care workers HR = 9.870 (95% CI 3.224 -30.22); >30 non-care workers HR = 18.927 (95% CI 2.358 -151.90).<br><br>Predictors of spread and increase in cases per unit after 5th April risk increased 1.0347 (95% CI 1.02-1.05) p < 0.001, reduced availability of PPE for eye protection increased risk 1.6571 (95% CI 1.29-2.13) p < 0.001, PPE for facemasks 1.2602 (95% CI 1.09-1.46) p = 0.002, count of care workers employed 1.0379 (95% CI 1.02-1.05) p < 0.001 count of nurses employed (in bands of 0-10,11-20, 21-30 and 31+) 1.1814 (95% CI 1.13-1.24) p < 0.001.                                                                                                                                                                                                                                                                          |
| Brown et al. (2020) <sup>42</sup>       | Facilities | Incidence in high crowding index homes was 9.7% versus 4.5% in low crowding index homes (p<0.001), while COVID-19 mortality was 2.7% versus 1.3%. Likelihood of COVID-19 introduction did not differ (31.3% vs 30.2%, p=0.79). After adjustment for a regional nursing home, and resident covariates, the crowding index remained associated with increased risk of infection (RR=1.72, 95% CI: 1.11-2.65) and mortality (RR=1.72, 95% CI: 1.03-2.86). Simulations suggested that converting all 4-bed rooms to 2-bed rooms would have averted 988 (18.9%) infections of COVID-19 and 271 (18.7%) deaths.                                                                                                                                                                                                                                                                                                                                                                                       |
| Burton et al. (2020) <sup>38</sup>      | Facilities | Significant associations between the presence of an outbreak and number of beds (OR per 20-bed increase 3.50), a history of multiple previous outbreaks (OR 3.76), and regulatory risk assessment score (OR high-risk vs low 2.19). However, in the adjusted analysis, only number of beds (OR per 20-bed increase 3.50, 95%CI 2.06 to 5.94 per 20-bed increase).                                                                                                                                                                                                                                                                                                                                                                                                                                                                                                                                                                                                                               |
| Dutey-Magni et al. (2020) <sup>39</sup> | Facilities | COVID-19 outbreak recorded in 121 of 179 facilities (67.6%). Large LTCF had greater rates of infection (aHR=1.8 [95% CI: 1.4-2.4] for LTCF with ≥70 beds versus <35 beds. The adjusted hazard ratio for confirmed infection was 2.5 times [95% CI: 1.9-3.3] greater in LTCF with 0.85-1 resident per room versus LTCF with 0.7-0.85 resident per room. A ten-percentage point increase in the bed to staff ratio was associated with a 23% increase in infection (aHR=1.23 [95% CI: 1.17-1.31]).                                                                                                                                                                                                                                                                                                                                                                                                                                                                                                |
| Fisman et al. (2020) <sup>43</sup>      | Facilities | Covid-19 cases higher in for-profit operators 165/361 (45.7%) compared to charitable 18/57 (31.6%).                                                                                                                                                                                                                                                                                                                                                                                                                                                                                                                                                                                                                                                                                                                                                                                                                                                                                             |
| Hand et al. (2018) <sup>24</sup>        | Facilities | Residents noted to share rooms, walk throughout the facility and spent time in shared areas (e.g., gym, dining rooms, and recreational rooms). Because all case-patients had visited the gym at the facility for recreation or physical therapy before becoming ill, environmental cleaning of this area was performed.                                                                                                                                                                                                                                                                                                                                                                                                                                                                                                                                                                                                                                                                         |
| Heung et al. (2006) <sup>47</sup>       | Facilities | 67 of 90 residents participated. 26 of 32 staff participated. 2 residents and one staff member were positive during the outbreak. None of the remaining participants was positive for SARS-CoV antibodies. Residents were aged 65+ years, 79% were female, 93% were ambulant, 90% did activities with others, 79% went out.<br>Review of residents who died: Resident A transferred from the hospital and was chair bound and dependent with care needs. Resident B was chair bound and had not left home or had visitors. She was brought to a shared sitting room during mealtimes. This was only time residents A and B were located near each other. One resident shared a room with patient B and tested positive. Staff C was a domestic worker, and contact was via clinical waste in resident A room.<br>Low seroprevalence attributed to precautionary measures taken in the facility to reduce droplet and prevent contact transmission.<br>Risks noted of SARS via fomites possible. |

|                                                                                  |                                                     |            |                                                                                                                                                                                                                                                                                                                                                                                                                                                                                                                                                                                                                                                                                                                                                                                                                                                                                                                                                                                                                                                                                                                |
|----------------------------------------------------------------------------------|-----------------------------------------------------|------------|----------------------------------------------------------------------------------------------------------------------------------------------------------------------------------------------------------------------------------------------------------------------------------------------------------------------------------------------------------------------------------------------------------------------------------------------------------------------------------------------------------------------------------------------------------------------------------------------------------------------------------------------------------------------------------------------------------------------------------------------------------------------------------------------------------------------------------------------------------------------------------------------------------------------------------------------------------------------------------------------------------------------------------------------------------------------------------------------------------------|
| 1<br>2<br>3<br>4<br>5<br>6                                                       | Ho et al. (2004) <sup>48</sup>                      | Facilities | 3 residents positive for SARS. 1 employee positive for SARS. 3 visitors positive for SARS. The index case was a single resident who was infected during a hospital stay, returned to the LTCF, and the virus spread to another 6 people. Transmission of the virus occurred due to lack of isolation rooms in nursing homes, lack of restricted movement of other patients and relatives, lack of infection control precautions, lack of knowledge among staff.                                                                                                                                                                                                                                                                                                                                                                                                                                                                                                                                                                                                                                                |
| 7<br>8<br>9<br>10                                                                | Iritani et al. (2020) <sup>52</sup>                 | Facilities | Larger cluster sizes in long term care hospitals/facilities were significantly positively associated with higher morbidity ( $\rho = 0.336$ , $P = 0.006$ ) and higher mortality ( $\rho = 0.317$ , $P = 0.009$ ). Multivariate logistic regression showed larger cluster size (OR = 1.077, 95% CI: 1.017-1.145) and larger cluster number (OR = 2.019, 95% CI: 1.197-3.404) associated with mortality.                                                                                                                                                                                                                                                                                                                                                                                                                                                                                                                                                                                                                                                                                                        |
| 11<br>12<br>13<br>14                                                             | Kennelly et al. (2020) <sup>51</sup>                | Facilities | Outbreak recorded in 75.0% (21/28) of facilities – four public and seventeen private. During the study period, 40.1% of residents in 21 nursing homes with outbreaks had a laboratory diagnosis of COVID-19. Correlation between the proportion of symptomatic staff and number of residents with confirmed/suspected COVID-19 ( $\rho=0.81$ ). No significant correlation between the proportion of asymptomatic staff and number of residents with confirmed/suspected COVID-19 ( $\rho=0.18$ $p=0.61$ ).                                                                                                                                                                                                                                                                                                                                                                                                                                                                                                                                                                                                    |
| 15<br>16                                                                         | Kim (2020) <sup>53</sup>                            | Facilities | After the management of the outbreak, there were no more infected persons. All patients and employees tested negative 14 days from the start of quarantine.                                                                                                                                                                                                                                                                                                                                                                                                                                                                                                                                                                                                                                                                                                                                                                                                                                                                                                                                                    |
| 17<br>18<br>19<br>20<br>21<br>22<br>23<br>24                                     | McMichael et al. (2020) a <sup>29</sup>             | Facilities | February 28, 2020, four cases COVID-19 identified in County. One person identified as index case from Facility A. Staff roles for confirmed cases reported: therapists, nurses, nurse assistants, health information manager, physician, and case manager. Paper reports that 30 facilities in County had confirmed cases and provides detail on first 9 (Facilities A to I). Facility A shared staff with another facility and two resident transfers from facility A. Surveillance reported inadequate PPE, training, infection control practices, lack of documentation signs and symptoms, working in unfamiliar facilities or sharing staff. On March 10, 2020, the governor of Washington implemented mandatory screening of health care workers and visitor restrictions for all licensed nursing homes and assisted living facilities including screening, testing, policies around visiting, excluding symptomatic staff, close monitoring of residents, testing, training and PPE. Monitoring of staff absences.                                                                                     |
| 25<br>26<br>27<br>28<br>29<br>30<br>31<br>32                                     | Office for National Statistics (2020) <sup>40</sup> | Facilities | For each additional member of infected staff working at the care home, the odds of resident infection increase by 11%, i.e. OR = 1.11 (95% CI: 1.1-1.11). Care homes using bank or agency nurses or carers most or every day more likely to have cases in residents (OR= 1.58, 95% CI: 1.5 - 1.65) compared to those who never use bank or agency staff. Residents in care homes outside of London had a lower chance of infection, except West Midlands (OR = 1.09, 95% CI: 1.0 - 1.17). Homes where staff receive sick pay are less likely to have resident cases (OR= 0.82 to 0.93, 95% CI: 7-18%), compared to homes where no sick leave. For each additional infected resident at a home, the odds of staff infection increase by 4% OR=1.04 (95% CI: 4 - 4%). Care homes using bank or agency staff most or every day OR=1.88 (95% CI: 1.77-2.0) compared to homes not using. Homes where staff regularly work elsewhere (most or every day) increase odds (OR=2.4, 95% CI: 1.92 - 3.0) compared to homes who never work elsewhere. Staff at homes outside London had higher odds of COVID-19 infection. |
| 33<br>34<br>35<br>36<br>37<br>38<br>39<br>40<br>41<br>42<br>43<br>44<br>45<br>46 | Patel et al. (2020) <sup>30</sup>                   | Facilities | First resident unwell March 9, female aged in her 60s with cough and fever. Hospitalized March 11 and tested positive COVID-19 March 13. 14 residents who were positive developed symptoms over 30 day follow up. 21% (n=7) confirmed cases lived in single occupancy rooms. 55% (n=18) were in a double room with another confirmed case, and 24% (n=8) were in a double room with a resident who was negative March 15. Screening visitors and staff for symptoms, restricting visiting hours from March 6. No visitor access from March 12. Universal masking of all staff and residents from March 14. 15th -19th March on-site team implemented assessment of symptoms, resident cohorting. Staff testing positive isolated and return 7 days or after 72 hours of symptoms resolving. Education and training to staff in facility A infection control, PPE, vital signs                                                                                                                                                                                                                                  |

|                                                                |                                     |            |                                                                                                                                                                                                                                                                                                                                                                                                                                                                                                                                                                                                                                                                                                                                                                                                                                                                                                                                                                                                                                                                                                                                                                                                                                                                                                                                                                                           |
|----------------------------------------------------------------|-------------------------------------|------------|-------------------------------------------------------------------------------------------------------------------------------------------------------------------------------------------------------------------------------------------------------------------------------------------------------------------------------------------------------------------------------------------------------------------------------------------------------------------------------------------------------------------------------------------------------------------------------------------------------------------------------------------------------------------------------------------------------------------------------------------------------------------------------------------------------------------------------------------------------------------------------------------------------------------------------------------------------------------------------------------------------------------------------------------------------------------------------------------------------------------------------------------------------------------------------------------------------------------------------------------------------------------------------------------------------------------------------------------------------------------------------------------|
| 1<br>2<br>3<br>4<br>5<br>6<br>7<br>8                           | Quigley et al. (2020) <sup>32</sup> | Facilities | For-profit = 67.86%, non-profit = 26.79% and government-owned = 5.36%. 37.5% were part of a chain. 54% have COVID-19 plans. All had staff training for COVID-19 and 100% processes to restrict/ limit visitors. 29% conducted COVID-19 simulation training. Communication with local Public Health - 96%, and 68% linked to local hospital referral. 66% reported access to COVID-19 tests - available for all residents and 53% of staff. 72% reported inadequate PPE supplies. 83% expected staff shortages. Solutions for staff included staff volunteer for more shifts (55%), non-clinical staff used (45%). 19% reported they would use agency staff.                                                                                                                                                                                                                                                                                                                                                                                                                                                                                                                                                                                                                                                                                                                               |
| 9<br>10<br>11                                                  | Sacco et al. (2020) <sup>46</sup>   | Facilities | Restrictions on residents from March 16 - social distancing, remain in single rooms, no communal dining or group activities. No visitors since March 10, individual walks outside only in the presence of one staff member. Mail and packages stored 24 hours before being delivered to residents. Enhanced hygiene and cleaning. Staff had permanent face masks and additional hand hygiene                                                                                                                                                                                                                                                                                                                                                                                                                                                                                                                                                                                                                                                                                                                                                                                                                                                                                                                                                                                              |
| 12<br>13<br>14<br>15                                           | Sanchez et al. (2020) <sup>34</sup> | Facilities | Of the 12 facilities in the final survey, eight had implemented cohorting in a dedicated COVID-19 unit before 1st follow up. 4 remaining initiating cohorting after receiving results. 4 facilities did not assign dedicated personnel to care for residents with COVID-19 due to staff shortages. Final survey census 80 residents (range 36 to 147). 373 of 1063 (35%) had received positive results 1st follow up.                                                                                                                                                                                                                                                                                                                                                                                                                                                                                                                                                                                                                                                                                                                                                                                                                                                                                                                                                                     |
| 16<br>17<br>18<br>19<br>20<br>21<br>22<br>23<br>24<br>25<br>26 | Stall (2020) <sup>44</sup>          | Facilities | Adjusted modelling odds of COVID-19 outbreak associated with for-profit status aOR 1.01 (95% CI: 0.64-1.57), Municipal aOR 0.83 (95% CI: 0.45-1.54). Model 2 + Health Region aOR 2.02 (95% CI: 1.20-3.38) population <10,000 rural aOR 0.27 (95% CI: 0.13-0.58); and model 3 + home characteristics. Number of residents (unit of 50) aOR 1.38 (95% CI: 1.18-1.61), older design aOR 1.55 (95% CI: 1.01-2.38), chain ownership vs single home aOR 1.47 (95% CI: 0.86 to 2.51) and staff (full time equivalent/ bed ratio aOR 1.98 (95% CI: 0.39-9.97). The extent of a COVID-19 outbreak with profit aRR 1.83 (95% CI: 1.18-2.84) vs municipal aRR 0.60 (95% CI: 0.28 -1.30) compared with non-profit. Health Region aRR 1.65 (95% CI: 1.02- 2.67), older design standards aRR (95% CI: 1.27 -2.79), chain ownership aRR 1.84 (95% CI: 1.08-3.15) and staff/ bed ratio a RR 0.73 (95% CI: 0.10-5.35). Deaths accounted for 6.5% of all residents in for-profit homes vs 5.5 % in non-profit vs 1.7% municipal LTCF. For-profit associated with total COVID-19 deaths aRR 1.78, (95% CI: 1.03 - 2.07). Adjusted model increased risk of death with for-profit aRR 0.82, (95% CI: 0.44- 1.54), older design facilities aRR 2.08 (95% CI: 1.28-3.36) and chain ownership aRR 1.89, (95% CI: 1.00- 3.59). Number of active residents was protective aRR 0.81, (95% CI: 0.70 -0.95) / 50 beds. |
| 27<br>28<br>29<br>30<br>31                                     | Unruh et al. (2020) <sup>36</sup>   | Facilities | 184 nursing homes (15.8%) had 6 or more COVID-19 deaths. Deaths associated with Medicaid patients (quintile 5: 8.6 PP greater probability vs quintile 1). Patients with higher ADL scores (2.6 (95% CI: 1.4-3.8) PP, p<0.001), more total beds (0.1 (95% CI: 0.0 to 0.1) PP, p<0.001), higher occupancy (0.3 (95% CI: 0.1-0.5) PP, p<0.009), for-profit status (4.8 (95% CI: 0.8-8.8) PP, p=0.019). Comparing States: Higher mortality in those with Medicaid (quintile 5: 6.1 (95% CI: 0.0-12.1) PP, p=0.048). Not significant for other States. More direct care hours per patient day associated with lower COVID-19 deaths All States (-4.8 95% CI: -9.4 - -0.03) PP, p<0.04).                                                                                                                                                                                                                                                                                                                                                                                                                                                                                                                                                                                                                                                                                                        |

OR, odds ratio; HR, hazard ratio; PPE, personal protective equipment; CI, confidence interval; LTCF, long-term care facility; aHR, adjusted hazard ratio;

aRR, adjusted relative risk; ADL, activities of daily living; PP, percentage points.

1  
2  
3 185 *Morbidity and mortality*  
4

5  
6 186 Morbidity and mortality results from included studies are presented for residents (Table 3a), staff  
7  
8 187 (Table 3b), and visitors (Table 3c). Prevalence of COVID-19 infection was reported in 29 studies,  
9  
10 188 including prevalence in residents (27 studies; <sup>18-30 33-35 39 40 42 44 46-51 54</sup>) and staff (22 studies; <sup>18 20-23 25 27-31</sup>  
11  
12 189 <sup>33 35 39 40 45-49 51 54</sup>), with 2 studies reporting absolute case numbers in visitors.<sup>29 48</sup> Prevalence rates  
13  
14 190 ranged from 3.8% in a sample of 2074 LTCF<sup>49</sup> and 1.2% in the third point-prevalence survey at a  
15  
16 191 single facility<sup>21</sup> to 85.4% in a single facility that implemented a telemedicine service to limit  
17  
18 192 transmission.<sup>25</sup> Staff prevalence ranged from 0.6% in a point-prevalence survey in a single facility<sup>21</sup> to  
19  
20 193 62.6% in a group of nine LTCF.<sup>22</sup> One study reported 16 COVID-19 positive visitor cases,<sup>29</sup> while a  
21  
22 194 study that examined SARS infection following an outbreak in a Hong Kong facility reported three  
23  
24 195 positive visitor cases.<sup>48</sup>  
25  
26

27  
28 196 The symptom status (symptomatic/presymptomatic/asymptomatic, typical/atypical symptoms) of  
29  
30 197 participants was reported in 16 studies, with resident and staff symptom status reported in 15 <sup>18-20 22 23</sup>  
31  
32 198 <sup>26-28 30 33 34 46 49 51 54</sup> and 13 studies,<sup>20-23 27 28 30 33 45 46 49 51 54</sup> respectively. No studies reported symptom  
33  
34 199 status of visitors. The proportion of COVID-19 positive residents presenting with symptoms ranged  
35  
36 200 from 26.3%<sup>20 27</sup> to 59.8% (a sample of both residents and healthcare workers).<sup>28</sup> Asymptomatic cases  
37  
38 201 in residents were reported in 13 studies,<sup>18 20 22 23 26-28 30 33 46 49 51 54</sup> with proportions of COVID-19  
39  
40 202 positive residents presenting with no symptoms varying from 2.4%<sup>46</sup> to 75.3%.<sup>49</sup> Among COVID-19  
41  
42 203 positive staff, the proportion of symptomatic cases ranged from 6.4%<sup>27</sup> to 100%,<sup>33</sup> and asymptomatic  
43  
44 204 cases ranged from 23.6%<sup>51</sup> to 100%.<sup>21 23</sup>  
45  
46

47 205 Mortality results were reported in 22 studies, including information on mortality of residents (22  
48  
49 206 studies; <sup>18-20 23-25 28-30 34 35 38-44 46 48 50 51</sup>), staff (4 studies; <sup>29 35 46 48</sup>), and visitors (2 studies; <sup>29 48</sup>). Mortality  
50  
51 207 rates in COVID-19 positive residents ranged from 5.3%<sup>20</sup> to 55.3%.<sup>39</sup> One study reported a 66.7%  
52  
53 208 death rate in residents who tested positive for the SARS virus.<sup>48</sup> A study examining the mortality risk  
54  
55 209 in Ontario LTCF reported a death rate of 0.1% across all residents.<sup>43</sup> Across the three studies which  
56  
57 210 presented mortality results in COVID-19 positive staff, mortality rates were 0%.<sup>29 35 46</sup> One study  
58  
59 211 presenting mortality rates in a nursing home following a SARS outbreak reported one death of a  
60

1  
2  
3 212 member of staff.<sup>48</sup> Mortality rates reported in visitors in two studies was 0%<sup>48</sup> and 6.2%,<sup>29</sup>  
4  
5 213 respectively.

6  
7  
8 214 *Characteristics of LTCFs on COVID-19 transmission*

9  
10 215 Numerous facility-specific characteristics were linked with risk of COVID-19 cases (Table 2). These  
11  
12 216 include size of LTCF,<sup>17 38 39 52</sup> staffing levels and/or use of agency care staff,<sup>29 32 37 39 40 44 51</sup> part of  
13  
14 217 larger chain of organisations and/or for profit status,<sup>17 32 36 43 44 51</sup> and related staffing, crowding, or  
15  
16 218 availability of single rooms.<sup>24 30 40 42 44 46-48</sup>



Table 3a. Resident-specific outcomes of strategies implemented in nursing homes

| Study                                     | Interventions                                                                                                                                | Prevalence                                                                                                                                                                                      | Mortality                         | Other outcomes                                                                                                                                           |
|-------------------------------------------|----------------------------------------------------------------------------------------------------------------------------------------------|-------------------------------------------------------------------------------------------------------------------------------------------------------------------------------------------------|-----------------------------------|----------------------------------------------------------------------------------------------------------------------------------------------------------|
| Arons et al. (2020) <sup>18</sup>         | Mass testing (two point-prevalence surveys)<br>PPE                                                                                           | 48/76 (63%) across two surveys, 17/48 typical symptoms, 4/48 atypical symptoms, 3/48 asymptomatic, 24/48 presymptomatic<br><br>57/89 through point-prevalence, clinical evaluation, post-mortem | 15/57 (26%)                       | Common symptoms: fever (71%), cough (54%), malaise (42%)<br>Estimated doubling time: 3.4 days (95% CI: 2.5-5.3)                                          |
| Blackman et al. (2020) <sup>19</sup>      | PPE<br>Symptom screening<br>Visitor restrictions                                                                                             | 12 positive cases, 2 awaiting results, 47 symptomatic residents                                                                                                                                 | 3 COVID-19 related deaths         |                                                                                                                                                          |
| Borras-Bermejo et al (2020) <sup>54</sup> | Mass testing<br>Visitor restrictions                                                                                                         | 768/3214 (23.9%), 486 (69.5% of those with symptom information) were asymptomatic                                                                                                               |                                   | 2624 of all residents reported symptoms in the previous 14 days                                                                                          |
| Brown et al. (2020) <sup>42</sup>         | Facility characteristics                                                                                                                     | 5218/78607 (6.6%)                                                                                                                                                                               | 1452/5218 (27.8%)                 |                                                                                                                                                          |
| Burton et al. (2020) <sup>38</sup>        | Facility characteristics                                                                                                                     |                                                                                                                                                                                                 | 403 deaths recorded in care homes | 472 excess deaths in care homes with an outbreak (399 COVID-19 related)                                                                                  |
| Dora et al. (2020) <sup>20</sup>          | Mass testing (three point-prevalence surveys)<br>Symptom screening<br>Visitor restrictions<br>Hand hygiene, contact precautions<br>Cohorting | 19/96 (19.8%) across three surveys, 5/19 symptomatic, 8/19 presymptomatic, 6/19 asymptomatic                                                                                                    | 1/19 (5.3%)                       | Symptoms: fever (58%), myalgia (58%), cough (47%), dyspnoea (32%), nausea (32%)<br>Oxygen therapy required for 4/8 presymptomatic, 4/5 symptomatic cases |
| Dutey-Magni et al. (2020) <sup>39</sup>   | Mass testing                                                                                                                                 | 951/9339 (10.2%)                                                                                                                                                                                | 526/951 (55.3%)                   | 2075/9339 (22.2%) experienced infection symptoms                                                                                                         |
| Eckardt et al. (2020) <sup>21</sup>       | Mass testing (three point-prevalence surveys)<br>PPE<br>Symptom screening<br>Visitor restrictions<br>Cohorting                               | Survey 1: 5/105 (4.8%)<br>Survey 2: 4/86 (4.7%)<br>Survey 3: 1/85 (1.2%)                                                                                                                        |                                   |                                                                                                                                                          |
| Feaster & Goh (2020) <sup>22</sup>        | Mass testing                                                                                                                                 | 408/582 (49.5%), 202/408 (49.5%) symptomatic                                                                                                                                                    |                                   |                                                                                                                                                          |



|                                    |                                                          |                                                                                                                                                       |                 |                                                                                                                                                                                                                                                                                                                                                                                                                              |
|------------------------------------|----------------------------------------------------------|-------------------------------------------------------------------------------------------------------------------------------------------------------|-----------------|------------------------------------------------------------------------------------------------------------------------------------------------------------------------------------------------------------------------------------------------------------------------------------------------------------------------------------------------------------------------------------------------------------------------------|
|                                    |                                                          | 237/332 (71.4%) female residents positive, 121/237 (51.1%) asymptomatic<br>171/250 (68.4%) male residents positive, 81/171 (47.4%) asymptomatic       |                 |                                                                                                                                                                                                                                                                                                                                                                                                                              |
| Fisman et al. (2020) <sup>43</sup> | Facility characteristics                                 |                                                                                                                                                       | 83/79498 (0.1%) | IRR (COVID-19 related death in LTCF residents) = 13.1 (95% CI: 9.9-17.3) compared with community-living adults older than 69 years                                                                                                                                                                                                                                                                                           |
| Graham et al (2020) <sup>23</sup>  | Mass testing (two point-prevalence surveys)<br>Cohorting | Survey 1: 126/313 (40%), 72/126 (57.1%) symptomatic, 50 typical symptoms, 22 atypical symptoms, 54/126 (42.9%) asymptomatic<br>Survey 2: 5/176 (2.8%) | 53/131 (40.4%)  | Increased risk of death: men (48% of deaths vs. 34% in those who survived; whole group 38% male, p=0.02); the trend for median age to be greater among those who died (p = 0.058)<br>Increased odds of COVID-19 positive: new onset anorexia (OR = 3.74, 95% CI: 1.5-9.8); cough and/or shortness of breath (OR = 3.72, 95% CI: 1.8-7.8); fever, altered mental state/behaviour, diarrhoea not associated with positive test |
| Hand et al. (2018) <sup>24</sup>   | Symptom screening<br>Hand hygiene, contact precautions   | 20/130 residents suspected cases, 13/20 tested 7/13 (54%) tested positive; 6/7 required hospitalization                                               | 3/7 (42.9%)     | No new cases identified after November 18 2017                                                                                                                                                                                                                                                                                                                                                                               |
| Harris et al. (2020) <sup>25</sup> | Facility characteristics                                 | 41/48 (85.4%)<br>18/48 residents hospitalised, 11/18 returned to facility from hospital                                                               | 6/48 (12.5%)    | 13/48 (27.1%) of residents received telemedicine consultations                                                                                                                                                                                                                                                                                                                                                               |
| Heung et al. (2006) <sup>47</sup>  | Hand hygiene, contact precautions                        | 2 residents were positive during the outbreak, 0/67 residents positive for SARS-CoV antibodies upon screening                                         |                 | 2/67 reported symptoms                                                                                                                                                                                                                                                                                                                                                                                                       |
| Ho et al. (2004) <sup>48</sup>     | PPE<br>Cohorting                                         | 3 residents positive                                                                                                                                  | 2/3 (66.7%)     |                                                                                                                                                                                                                                                                                                                                                                                                                              |
| Hoxha et al. (2020) <sup>49</sup>  | Mass testing                                             | 5390/142100 (3.8%), 4059/5390 (75.3%) asymptomatic                                                                                                    |                 | Infection odds: Women compared to men OR = 1.2 (95% CI: 1.1-1.2); symptomatic compared to                                                                                                                                                                                                                                                                                                                                    |

|                                                     |                                                                                                                                                     |                                                                                                                                                                                                                           |                                          |                                                                                                                                                                          |
|-----------------------------------------------------|-----------------------------------------------------------------------------------------------------------------------------------------------------|---------------------------------------------------------------------------------------------------------------------------------------------------------------------------------------------------------------------------|------------------------------------------|--------------------------------------------------------------------------------------------------------------------------------------------------------------------------|
|                                                     |                                                                                                                                                     |                                                                                                                                                                                                                           |                                          | asymptomatic OR = 8.5 (95% CI: 8.0-9.0)                                                                                                                                  |
| Kennelly et al. (2020) <sup>51</sup>                | Mass testing<br>Facility characteristics                                                                                                            | 710/1741 (40.1%), 54/1741 (3.1%) residents were suspected COVID-19, 193/710 (27.2%) asymptomatic, 396/710 (55.8%) had recovered by the completion of surveillance period                                                  | 183/710 (25.8%)                          | Non-COVID-19 mortality rate similar between outbreak and non-outbreak NHS (5.1% vs. 4%, p=0.4)                                                                           |
| Kimball et al. (2020) <sup>32</sup>                 | Mass testing (three point-prevalence surveys)<br>PPE<br>Symptom screening<br>Visitor restrictions<br>Hand hygiene, contact precautions<br>Cohorting | 23/76 (30.3%), 10/23 symptomatic (8/10 typical symptoms, 2/10 atypical symptoms), 3/23 asymptomatic, 10/23 presymptomatic                                                                                                 |                                          | Symptoms: fever (61.5%), malaise (46.2%), cough (38.5), Presymptomatic mean interval from testing to symptom onset was 3 days                                            |
| Klein et al. (2020) <sup>50</sup>                   | Mass testing<br>PPE<br>Visitor restrictions<br>Cohorting                                                                                            | 39/60 (65%)                                                                                                                                                                                                               | 8/39 (20.5%)                             | Symptoms: exhaustion, loss of appetite, dysphagia, fever, cough, colds, diarrhoea                                                                                        |
| Lennon et al. (2020) <sup>27</sup>                  | Mass testing                                                                                                                                        | 2654/16966 (15.5%), 1692/2654 (63.8%) asymptomatic, 699/2654 (26.3%) symptomatic, (263/2654 symptom data missing)                                                                                                         |                                          |                                                                                                                                                                          |
| Louie et al. (2020) <sup>28</sup>                   | Mass testing<br>Symptom screening<br>Visitor restrictions                                                                                           | 214/431 (49.7%) residents and healthcare workers, 128/214 (59.8%) symptomatic (78/128 were residents), 86/214 (40.2%) asymptomatic<br>Additional 156 asymptomatic residents subsequently tested: 63/156 COVID-19 positive | 12/78 (15.4%) symptomatic residents died | 22/78 (28.2%) symptomatic residents hospitalized                                                                                                                         |
| McMichael et al. (2020) <sup>a29</sup>              | Mass testing<br>PPE<br>Cohorting                                                                                                                    | 101/118 (84.7%)                                                                                                                                                                                                           | 34/101 (33.7%)                           | 55/101 (54.5%) hospitalized; (37/101 no data on hospitalisation status)                                                                                                  |
| Office for National Statistics (2020) <sup>40</sup> | Mass testing<br>Facility characteristics                                                                                                            | 19.9% (95% CI: 18.5-21.3) in homes with a confirmed outbreak<br>10.7% (95% CI: 10.1-11.3) in all homes                                                                                                                    | 15606 across all homes                   | Odds of resident infection: Each additional infected staff member at a home OR = 1.11 (95% CI: 1.0-1.17)<br>Homes using bank or agency nurses most or all days OR = 1.58 |

|                                    |                                                                                                             |                                                                                                                                                                              |                                                                                                                           |                                                                                                                                                                                                                                                 |
|------------------------------------|-------------------------------------------------------------------------------------------------------------|------------------------------------------------------------------------------------------------------------------------------------------------------------------------------|---------------------------------------------------------------------------------------------------------------------------|-------------------------------------------------------------------------------------------------------------------------------------------------------------------------------------------------------------------------------------------------|
|                                    |                                                                                                             |                                                                                                                                                                              |                                                                                                                           | (95% CI: 1.5-1.65) compared with homes never using these staff<br>Homes outside of London had lower infection chance, except West Midlands (OR = 1.09, 95% CI: 1.0-1.17)<br>Homes where staff receive sick pay OR = 0.82-0.93 (95% CI: unknown) |
| Patel et al. (2020) <sup>30</sup>  | Mass testing<br>Symptom screening<br>Visitor restrictions<br>Cohorting                                      | 33/118 (28.0%), 19/33 (58%) symptomatic (8 typical symptoms, 4 atypical symptoms, 10 both typical and atypical symptoms); 1/33 (3%) presymptomatic, 13/33 (39%) asymptomatic | 10/35 (28.6%) (5/10 symptomatic)<br>30-day survival = 71% (95% CI 52-83)                                                  | 1/91 negative residents reported symptoms<br>35/90 negative asymptomatic residents developed symptoms during 30-day surveillance, 2/35 COVID-19 positive upon re-testing<br>13/35 COVID-19 residents hospitalized                               |
| Roxby et al. (2020) <sup>33</sup>  | Mass testing<br>Symptom screening<br>Visitor restrictions<br>Hand hygiene, contact precautions<br>Cohorting | Survey 1: 3/80 (3.8%), 1/3 reported resolved cough and loose stool during the preceding 14 days<br>Survey 2: 1/77 (1.3%)                                                     |                                                                                                                           | All residents clinically stable 14 days after second test<br>21 days after the test, all cases continued their usual state of health                                                                                                            |
| Sacco et al. (2020) <sup>46</sup>  | Mass testing<br>PPE<br>Visitor restrictions<br>Hand hygiene, contact precautions<br>Cohorting               | 41/87 (47.1%)<br>3/41 asymptomatic                                                                                                                                           | 11/41 (27%)<br>All-cause mortality: 13% (95% CI 7.2-21.2), compared to 3% for the same period during the previous 5 years | 287/2773 (24%)<br>Incidence rate for residents = 1.54 per 100 person-days<br>14/87 (16.1%) residents hospitalized                                                                                                                               |
| Sanchez et al (2020) <sup>34</sup> | Mass testing (two point-prevalence surveys)<br>Cohorting                                                    | Survey 1: 716/2218 (32.3%), 344/716 (48%) symptomatic<br>Survey 2: 115/637 (18.1%), 5/115 (4%) symptomatic<br>Total surveillance period: 1207/2773 (44%)                     |                                                                                                                           | 446/2773 (37%) hospitalised                                                                                                                                                                                                                     |
| Stall et al. (2020) <sup>44</sup>  | Facility characteristics                                                                                    | 5218/75676 (6.9%)<br>3599/5218 (69.0%) for-profit home residents                                                                                                             | 1452/5218 (27.8%)                                                                                                         |                                                                                                                                                                                                                                                 |

|                                    |                                                                                   |                                                                                                          |                                                                                                       |                                                                                                                                                                                                                                                                                                                                        |
|------------------------------------|-----------------------------------------------------------------------------------|----------------------------------------------------------------------------------------------------------|-------------------------------------------------------------------------------------------------------|----------------------------------------------------------------------------------------------------------------------------------------------------------------------------------------------------------------------------------------------------------------------------------------------------------------------------------------|
|                                    |                                                                                   | 1239/5218 (23.7%) non-profit home residents<br>380/5218 (7.3%) municipal home residents                  | 989/3599 (27.5%) for-profit home<br>368/1239 (29.7%) non-profit home<br>95/380 (25.0%) municipal home |                                                                                                                                                                                                                                                                                                                                        |
| Stow et al. (2020) <sup>41</sup>   | Facility characteristics                                                          |                                                                                                          | 1532 COVID-19 related deaths                                                                          | Highest correlation of increased NEWS and deaths observed for a two-week lag ( $r=0.82$ , $p<0.05$ )<br>Above baseline measures of high respiratory rate ( $r=0.73$ , $p<0.05$ for a two-week lag) and low oxygen saturation ( $r=0.8$ , $p<0.05$ for a two-week lag) appear to follow the pattern of COVID-19 and non-COVID-19 deaths |
| Telford et al (2020) <sup>35</sup> | Mass testing (15 facilities in response to outbreak, 13 facilities as prevention) | 821/2868 (28.6%)<br>Response group: 804/1703 (47.2%)<br>Preventive group: 17/1133 (1.5%), ( $p<0.0001$ ) | Response group: 131/804 (16.3%)<br>Preventive group: 3/17 (17.6%)                                     | Response group: 171/804 (21.3%) residents hospitalised<br>Preventive group: 5/17 (29.4%) residents hospitalised                                                                                                                                                                                                                        |

PPE, personal protective equipment; CI, confidence interval; IRR, incidence risk ratio; LTCF, long-term care facility; OR, odds ratio; NEWS, national early warning score.

Table 3b. Staff-specific outcomes of strategies to reduce transmission

| Study                                     | Interventions                                    | Prevalence                                                                                                               | Mortality | Other outcomes                                                                          |
|-------------------------------------------|--------------------------------------------------|--------------------------------------------------------------------------------------------------------------------------|-----------|-----------------------------------------------------------------------------------------|
| Arons et al. (2020) <sup>18</sup>         | Mass testing<br>PPE                              | 26/51 (51.0%)<br>17/26 (65%) were nursing staff, 9/26 (35%) had roles that provided care/therapies across multiple units |           | 0/26 hospitalized                                                                       |
| Blackman et al. (2020) <sup>19</sup>      | PPE<br>Symptom screening<br>Visitor restrictions |                                                                                                                          |           | 26 staff members absent from work due to sickness                                       |
| Borras-Bermejo et al (2020) <sup>54</sup> | Mass testing<br>Visitor restrictions             | 403/2655 (15.2%), 144/403 (35.7%) asymptomatic                                                                           |           | 1772/2665 (66.7%) staff reported fever or respiratory symptoms in the preceding 14 days |

|                                         |                                                                                                                                              |                                                                                                                                                          |  |                                                                                                                                                                                                                                                                                 |
|-----------------------------------------|----------------------------------------------------------------------------------------------------------------------------------------------|----------------------------------------------------------------------------------------------------------------------------------------------------------|--|---------------------------------------------------------------------------------------------------------------------------------------------------------------------------------------------------------------------------------------------------------------------------------|
| Dora et al. (2020) <sup>20</sup>        | Mass testing (three point-prevalence surveys)<br>Symptom screening<br>Visitor restrictions<br>Hand hygiene, contact precautions<br>Cohorting | 8/136 (6%)<br>4/8 (50%) asymptomatic<br>3/8 nursing staff<br>5/8 licensed vocational nurses                                                              |  |                                                                                                                                                                                                                                                                                 |
| Dutey-Magni et al. (2020) <sup>39</sup> | Mass testing                                                                                                                                 | 585/11604 (5.0%)                                                                                                                                         |  | 1892/11604 (16.3%) reported symptoms                                                                                                                                                                                                                                            |
| Eckardt et al. (2020) <sup>21</sup>     | Mass testing (three point-prevalence surveys)<br>PPE<br>Symptom screening<br>Visitor restrictions<br>Cohorting                               | Survey 1: 10/176 (5.7%), 10/10 (100%) asymptomatic<br>Survey 2: 5/175 (2.9%), 5/5 (100%) asymptomatic<br>Survey 3: 1/173 (0.6%), 1/1 (100%) asymptomatic |  |                                                                                                                                                                                                                                                                                 |
| Feaster & Goh (2020) <sup>22</sup>      | Mass testing                                                                                                                                 | 223/356 (62.6%), 55/223 (24.7%) asymptomatic                                                                                                             |  | Infection prevalence higher in staff with direct resident contact (150/219, 68.5%) compared with staff with no direct resident contact (25/52, 48.1%)                                                                                                                           |
| Fisman et al. (2020) <sup>43</sup>      | Facility characteristics                                                                                                                     |                                                                                                                                                          |  | Infection among LTCF staff was associated with death among residents with a 6-day lag (adjusted IRR for death per infected staff member, 1.17; 95% CI: 1.11-1.26) and a 2-day lag (relative increase in risk of death per staff member with infection, 1.20; 95% CI: 1.14-1.26) |
| Graham et al. (2020) <sup>23</sup>      | Mass testing (two point-prevalence surveys)<br>Cohorting                                                                                     | 3/70 (4.3%)<br>3/3 (100%) asymptomatic                                                                                                                   |  | Staff absence due to sickness/self-isolation between March 1 and May 1 elevated relative to background level (215.9% increase, 95% CI: 80-352)                                                                                                                                  |
| Guery et al. (2020) <sup>45</sup>       | Mass testing                                                                                                                                 | 3/136 (2.2%)<br>1/3 (33.3%) asymptomatic                                                                                                                 |  |                                                                                                                                                                                                                                                                                 |

|                                                     |                                                           |                                                                                                                                                                                                                        |            |                                                                                                                                                                                    |
|-----------------------------------------------------|-----------------------------------------------------------|------------------------------------------------------------------------------------------------------------------------------------------------------------------------------------------------------------------------|------------|------------------------------------------------------------------------------------------------------------------------------------------------------------------------------------|
|                                                     |                                                           | 1/3 (33.3%) presymptomatic<br>1/3 (33.3%) symptomatic                                                                                                                                                                  |            |                                                                                                                                                                                    |
| Harris et al. (2020) <sup>26</sup>                  | Facility characteristics                                  | 7 staff COVID-19 positive prior to intervention<br>0 further staff positive after intervention implemented                                                                                                             |            |                                                                                                                                                                                    |
| Heung et al. (2006) <sup>47</sup>                   | Hand hygiene, contact precautions                         | 1 staff member SARS-CoV positive during outbreak (a domestic worker)<br>0/26 staff positive for SARS-CoV antibodies                                                                                                    |            |                                                                                                                                                                                    |
| Ho et al. (2004) <sup>48</sup>                      | PPE<br>Cohorting                                          | 1 staff member SARS positive                                                                                                                                                                                           | 1/1 (100%) |                                                                                                                                                                                    |
| Hoxha et al. (2020) <sup>49</sup>                   | Mass testing                                              | 2953/138327 (2.1%)<br>2185/2953 (74.0%) asymptomatic                                                                                                                                                                   |            |                                                                                                                                                                                    |
| Kennelly et al. (2020) <sup>51</sup>                | Mass testing<br>Facility characteristics                  | 675 staff COVID-19 positive<br>159/675 (23.6%) asymptomatic                                                                                                                                                            |            | Proportion of symptomatic staff correlated with number of residents with confirmed/suspected COVID-19, $\rho = 0.81$ ( $p < 0.001$ )                                               |
| Lennon et al. (2020) <sup>27</sup>                  | Mass testing                                              | 624/15514 (4.1%)<br>487/624 (78.0%) asymptomatic<br>40/624 (6.4%) symptomatic                                                                                                                                          |            |                                                                                                                                                                                    |
| Louie et al. (2020) <sup>28</sup>                   | Mass testing<br>Symptom screening<br>Visitor restrictions | 214/431 (49.7%) residents and staff COVID-19 positive<br>86/214 asymptomatic<br>128/214 symptomatic (50/128 were health care workers)<br>Additional asymptomatic staff testing: 23/147 (15.6%) staff COVID-19 positive |            | 0/50 symptomatic health care workers hospitalized                                                                                                                                  |
| McMichael et al. (2020) <sup>a29</sup>              | Mass testing<br>PPE<br>Cohorting                          | 50 staff COVID-19 positive                                                                                                                                                                                             | 0/50 (0%)  | 3/50 (6%) hospitalised<br>Staff roles for confirmed cases: therapists, nurses, nurse assistants, health information manager, physician, case manager                               |
| Office for National Statistics (2020) <sup>40</sup> | Mass testing<br>Facility characteristics                  | Estimated 6.9% (95% CI 5.9-7.9%) staff COVID-19 positive across homes that reported an outbreak                                                                                                                        |            | Odds of staff infection: for each additional infected resident, staff infection OR = 1.04 (95% CI: 1.04-1.04)<br>Care homes using bank or agency staff most or every day OR = 1.88 |

|                                    |                                                                                                             |                                                                                                                                                                                                                                                                                                                                                                                                                                                                                                     |           |                                                                                                                                                                                                                                                                             |
|------------------------------------|-------------------------------------------------------------------------------------------------------------|-----------------------------------------------------------------------------------------------------------------------------------------------------------------------------------------------------------------------------------------------------------------------------------------------------------------------------------------------------------------------------------------------------------------------------------------------------------------------------------------------------|-----------|-----------------------------------------------------------------------------------------------------------------------------------------------------------------------------------------------------------------------------------------------------------------------------|
|                                    |                                                                                                             |                                                                                                                                                                                                                                                                                                                                                                                                                                                                                                     |           | (95% CI: 1.77-2.0) compared to homes not using these staff<br>Homes where staff work in other homes most or every day OR = 2.4 (95% CI: 1.92-3.0) compared to homes where staff never work elsewhere<br>Staff at homes outside London had higher odds of COVID-19 infection |
| Patel et al. (2020) <sup>30</sup>  | Mass testing<br>Symptom screening<br>Visitor restrictions<br>Cohorting                                      | 19/42 (45.2%)<br>11/19 symptomatic (57.9%)<br>8/19 (42.1%) asymptomatic                                                                                                                                                                                                                                                                                                                                                                                                                             |           |                                                                                                                                                                                                                                                                             |
| Quicke et al. (2020) <sup>31</sup> | Mass testing (five point-prevalence surveys)                                                                | Site A: all staff uninfected<br>Site B: low prevalence in week 1, weeks 2-5 no infections detected, week 6 increase in cases<br>Site C: initial infection prevalence was lower (6.9%), and the incidence declined to zero by week 3<br>Site D: 22.5% of workers at site D had prevalent infections at the start of the study and incidence was high initially (12.2 per 100 workers per week), declining over time<br>Site E: low prevalence in week 1 saw an increase in cases in subsequent weeks |           |                                                                                                                                                                                                                                                                             |
| Roxby et al. (2020) <sup>33</sup>  | Mass testing<br>Symptom screening<br>Visitor restrictions<br>Hand hygiene, contact precautions<br>Cohorting | 2/62 (3.2%) (1 worked in dining facilities, 1 was a health aide)<br>2/2 (100%) symptomatic                                                                                                                                                                                                                                                                                                                                                                                                          |           |                                                                                                                                                                                                                                                                             |
| Sacco et al (2020) <sup>46</sup>   | Mass testing<br>PPE<br>Visitor restrictions<br>Hand hygiene, contact precautions<br>Cohorting               | 22 staff COVID-19 positive<br>9/22 (40.1%) asymptomatic                                                                                                                                                                                                                                                                                                                                                                                                                                             | 0/22 (0%) | Staff incidence: Care givers = 0.48/100 person-days<br>Non-care givers with resident contact = 0.36/100 person-days<br>Non-care givers with no resident contact = 0.04/100 person-days                                                                                      |

|                                    |                                                                                   |                                                                                                                                                                  |                                                                             |                                                                                                                                                                              |
|------------------------------------|-----------------------------------------------------------------------------------|------------------------------------------------------------------------------------------------------------------------------------------------------------------|-----------------------------------------------------------------------------|------------------------------------------------------------------------------------------------------------------------------------------------------------------------------|
| Stall (2020) <sup>44</sup>         | Facility characteristics                                                          |                                                                                                                                                                  |                                                                             | Outbreak involving staff and residents' for-profit homes 59/360 and staff only 44/360<br>Non-profit homes staff only 18/162.<br>Municipal homes = outbreak staff only 16/101 |
| Telford et al (2020) <sup>35</sup> | Mass testing (15 facilities in response to outbreak, 13 facilities as prevention) | 264/2803 (9.4%)<br>Response group: 249/264 (94.3%)<br>Preventive group: 15/264 (5.7%) (d)<br>Prevalence: Response group 12.8% vs Preventive group 1.7%, p<0.0001 | 1/264 (0.4%)<br>Response group: 0/249 (0%)<br>Preventive group: 1/15 (6.7%) | 16/264 (6.1%) hospitalised<br>Response group: 15/249 (6.0%) hospitalised<br>Preventive group: 1/15 (6.7%) hospitalised 15/249                                                |

LTCF, long-term care facility; IRR, incidence risk ratio; CI, confidence interval.

Table 3c. Visitor-specific outcomes following the implementation of strategies

| Study                                 | Interventions                    | Prevalence                    | Mortality   | Other outcomes                                                                                                                                                                                 |
|---------------------------------------|----------------------------------|-------------------------------|-------------|------------------------------------------------------------------------------------------------------------------------------------------------------------------------------------------------|
| Ho et al. (2004) <sup>48</sup>        | PPE<br>Cohorting                 | 3 visitors SARS positive      | 0/3 (0%)    |                                                                                                                                                                                                |
| McMichael et al (2020) <sup>a29</sup> | Mass testing<br>PPE<br>Cohorting | 16 visitors COVID-19 positive | 1/16 (6.2%) | 8/16 (50%) hospitalized<br>Underlying conditions:<br>hypertension (2/8, 12.5%); cardiac disease (3/8, 18.8%); renal disease (2/8, 12.5%); obesity (3/8, 18.8%), pulmonary disease (2/8, 12.5%) |

PPE, personal protective equipment



1  
2  
3 219 *Quality review*  
4  
5

6 220 The quality ratings of included studies are presented in Supplementary Table 2. Overall quality of  
7  
8 221 evidence in this review is considered low based on MMAT assessment criteria.  
9

10  
11 222 **Discussion**  
12

13 223 Evidence in this review indicates the impact of COVID-19 on LTCF, demonstrating the vulnerability  
14  
15 224 of this setting in 11 countries. A novel outcome highlights the characteristics of LTCF associated with  
16  
17 225 COVID-19 outbreaks, in addition to reporting the prevalence rates of COVID-19 and associated  
18  
19 226 mortality and morbidity for residents, staff, and visitors. A variety of measures were implemented in  
20  
21 227 LTCF, of which many were instigated locally by facility managers, and others through agile public  
22  
23 228 health policy. Due to the rapid nature of introducing public health measures though, the evidence base  
24  
25 229 does not facilitate an evaluation of the effects of these measures individually. Mass testing of  
26  
27 230 residents with or without staff testing was the primary measure used to reduce transmission of  
28  
29 231 COVID-19. This provides objective evidence of infection rates in facilities, and enables application of  
30  
31 232 subsequent measures, including isolation of residents who are infected with re-designation of specific  
32  
33 233 staff to care for them. Repeated point-prevalence testing allows facilities to grasp the spread of the  
34  
35 234 virus along with the impact of their mitigation strategies.  
36  
37  
38

39 235 Further measures implemented in facilities echoed public health recommendations to the broader  
40  
41 236 community to limit the spread of the virus. These included guidance on hand hygiene, contact and  
42  
43 237 droplet precautions, and restricting staff, including agency workers, to working in only one facility.<sup>55</sup>  
44  
45 238 Restricting visitor access to facilities was implemented generally to reduce the likelihood of  
46  
47 239 introducing COVID-19 into LTCF, assessing body temperature and symptom screening of staff and  
48  
49 240 visitors on entry.  
50  
51

52  
53 241 The prevalence of COVID-19 infection varied throughout included studies, with no distinct pattern  
54  
55 242 emerging between prevention strategies and infection prevalence. Similarly, the mortality rate varied  
56  
57 243 widely among studies and prevention measures. However, patterns emerged regarding associations  
58  
59 244 between facility characteristics and the risk of a COVID-19 outbreak and spread. Sepulveda (2020)  
60

1  
2  
3 245 reports the disproportionately higher risk of contracting COVID-19 for residents of LTCF, calculating  
4  
5 246 a 12-country average mortality rate of 2772 per 100, 000 LTCF residents compared to 122 per 100,  
6  
7 247 000 for community dwelling older persons.<sup>56</sup> This represented an average 24.2 fold higher rate of  
8  
9 248 death (range 14.2 (Germany) to 73.7 (Canada)). Higher LTCF mortality rates in Canada (78.4%  
10  
11 249 compared to the OECD 12 country average of 43.7%) are explained by poorer services in care  
12  
13  
14 250 facilities and includes limited staffing and funding.<sup>56</sup>

15  
16 251 Evidence identified the facility size/number of beds was significantly associated with the probability  
17  
18 252 of having a COVID-19 case, and the resulting size of an outbreak. For example, in a sample of 30 US  
19  
20 253 nursing homes, the probability of having a COVID -19 case was increased in medium and large  
21  
22 254 facilities compared with small facilities,<sup>17</sup> while in 121 UK homes reporting an outbreak, facilities  
23  
24 255 with  $\geq 70$  beds had 80% greater infection rates than facilities with  $< 35$  beds.<sup>39</sup> A sample of 623  
25  
26 256 Canadian nursing homes demonstrated facilities with a high crowding index had more infections and  
27  
28 257 deaths than those with a low crowding index. Simulations conducted suggested nearly 20% of  
29  
30 258 infections and deaths may have been averted by converting all 4-bed rooms into 2-bed rooms.<sup>42</sup>  
31  
32 259 Similarly, facilities with a greater number of employees, staff who work in multiple facilities, and an  
33  
34 260 increased number of infected staff, were also more likely to experience a COVID -19 outbreak.<sup>37 40 51</sup>  
35  
36 261 However, facilities where staff receive sick leave were shown to be less likely to have positive  
37  
38 262 cases.<sup>40</sup> Reduced availability of PPE predicted the spread and increase in case number in facilities,<sup>37</sup>  
39  
40 263 while for-profit status of facilities was commonly identified as increasing the odds of case outbreaks  
41  
42 264 relative to non-profit status.<sup>17 32 36 43 44</sup>

43  
44  
45  
46 265 Rapid development of COVID-19 vaccines was recognised in early March 2020.<sup>57</sup> Lurie et al. (2020)  
47  
48 266 note previous success in the development of H1N1 vaccination, and similarly the challenges for  
49  
50 267 SARS, Ebola, and Zika vaccines.<sup>57</sup> The speed of developments is acknowledged, and Public Health  
51  
52 268 England (2021) report that at the end of February 2021 up to 5900 deaths were averted in people aged  
53  
54 269 80 years and older, with over 200 deaths prevented in those aged 7- to 79 years.<sup>58</sup> Montano (2021)  
55  
56 270 advises that an accelerated pace of vaccine developments may not lead to total eradication of the  
57  
58 271 virus, citing smallpox as the only virus that has been eliminated worldwide.<sup>59</sup> Given this, the

1  
2  
3 272 transmission reduction measures highlighted in the present review are of crucial importance for the  
4  
5 273 continued management of COVID-19 in LTFC.

6  
7  
8 274 *Quality review*

9  
10 275 The quality of evidence in this review is technically low, primarily reported from observational  
11  
12 276 studies, expert opinion, reporting of outbreaks and describing the process and management  
13  
14 277 (Supplementary Table 2). Factors associated with lower quality of evidence include the reliance on  
15  
16 278 self-reporting of symptoms, recall bias, use of datasets which may be incomplete, and use of  
17  
18 279 convenience sampling. However, confirmation of COVID-19 in the majority of studies was via  
19  
20 280 laboratory testing. We did not remove any study following our review of quality and the evidence is  
21  
22 281 consistent with real-time reporting of data to learn from outbreaks. Papers included from MEDRXIV  
23  
24 282 pre publishing repository are acknowledged; however, as papers were subsequently published in peer  
25  
26 283 review journals we reviewed accordingly. The Institute of Medicine (2004)<sup>60</sup> advocates for early  
27  
28 284 detection of epidemics, effective communication to the public, and promotion of research and  
29  
30 285 development for strategic planning.

31  
32  
33  
34 286 *Limitations in the review process*

35  
36  
37 287 A key strength of this review is that it addresses a knowledge gap and has collated evidence from a  
38  
39 288 broad methodological base to report the measures to reduce transmission of COVID-19 in LTFC and  
40  
41 289 reports characteristics of facilities.

42  
43  
44 290 Due to the heterogeneity of included studies, meta-analysis was not performed, while the descriptive  
45  
46 291 nature of studies prevents identification of a causative relationship between measures and outcomes.  
47  
48 292 We acknowledge that while a summary of facility characteristics and COVID-19 outcomes are  
49  
50 293 presented, insufficient evidence is available to statistically evaluate and summarise the relationship  
51  
52 294 between individual measures to prevent COVID-19 transmission and thus further research studies are  
53  
54 295 required to elucidate this. Despite this, the systematic approach to this review has identified the scope  
55  
56 296 of interventions implemented in LTFC to reduce COVID -19 transmission.

1  
2  
3 297 Publication bias was minimized with inclusion of pre-published evidence, follow up contacts with  
4  
5 298 authors for early reporting, and through the inclusion of observational study designs. Most studies  
6  
7 299 reported are in English, we translated papers from German and Spanish as part of the assessment and  
8  
9 300 review. Outbreak reports include convenience samples or smaller cohorts of residents in LTCF with  
10  
11 301 limited data reported in brief reports and letters. However, real-time reporting of outbreaks provides  
12  
13 302 immediate evidence and shared understanding advocated by the Institute of Medicine.<sup>60</sup>  
14  
15  
16 303 Evidence in this review builds on publications from Salcher-Konrad, et al.<sup>61</sup>, a report from WHO,<sup>62</sup>  
17  
18 304 and an Irish Expert Panel review,<sup>55</sup> furthermore, data on the role of facilities in the transmission of  
19  
20 305 COVID-19 are presented.  
21  
22

### 23 306 **Conclusion**

24  
25  
26 307 This novel, rapid review summarises the evidence base to date identifying specific factors for  
27  
28 308 consideration as part of preparedness plans to reduce transmission of COVID-19 outbreaks in LTCF.  
29  
30 309 Future research should incorporate methodologically robust study designs with longer follow up to  
31  
32 310 assess the impact on reducing transmission.  
33  
34

35 311

### 36 37 38 312 **Funding**

39  
40  
41 313 Authors declare no funds were provided for the production of this review.  
42

### 43 314 **Author Contributions**

44  
45  
46 315 CK, KF, and LM designed the study; KF and DS developed the search strategy; DS conducted the  
47  
48 316 literature search; KF and LM screened titles and full texts to select studies, and extracted data; LM,  
49  
50 317 EL, KF, and CK conducted quality ratings; KF, LM, DS, EL, EC, CK interpreted and synthesised  
51  
52 318 data; KF, LM, DS, EL, EC, CK were involved in writing. All authors have approved the final version  
53  
54 319 of the manuscript.  
55

### 56 57 58 320 **Conflicts of Interest**

59  
60

1  
2  
3 321 The authors declare no conflicts of interest. CK was a member of an expert panel investigating  
4  
5 322 COVID-19 in nursing homes in Ireland.  
6  
7

8 323 **Data availability**  
9

10  
11 324 No additional data available.  
12

13 325 **Ethics statement**  
14

15  
16 326 No ethical approval was required for this study.  
17  
18  
19 327  
20  
21

22 328 **References**  
23

- 24  
25 329 1. European Centre for Disease Prevention and Control (ECDC). Timeline of ECDC's response to  
26 330 COVID-19 2020 [cited 2020 4th October]. Available from:  
27  
28 331 <https://www.ecdc.europa.eu/en/covid-19/timeline-ecdc-response> accessed 4th October 2020.  
29  
30 332 2. World Health Organization. Coronavirus disease 2019 (COVID-19) Situation Report – 94, 2020.  
31 333 3. Nussbaumer-Streit B, Mayr V, Dobrescu AI, et al. Quarantine alone or in combination with other  
32 334 public health measures to control COVID-19: a rapid review. *The Cochrane database of*  
33 335 *systematic reviews* 2020;4(4):Cd013574. doi: 10.1002/14651858.cd013574 [published Online  
34 336 First: 2020/04/09]  
37 337 4. European Centre for Disease Prevention and Control (ECDC). Risk assessment: Outbreak of acute  
38 338 respiratory syndrome associated with a novel coronavirus, Wuhan, China. Stockholm: ECDC;  
39 339 2020 [updated 22 January 2020 Available from: [https://www.ecdc.europa.eu/en/publications-](https://www.ecdc.europa.eu/en/publications-data/rapid-risk-assessment-cluster-pneumonia-cases-caused-novel-coronavirus-wuhan2020)  
40 340 [data/rapid-risk-assessment-cluster-pneumonia-cases-caused-novel-coronavirus-wuhan2020](https://www.ecdc.europa.eu/en/publications-data/rapid-risk-assessment-cluster-pneumonia-cases-caused-novel-coronavirus-wuhan2020).  
41  
42 341 5. World Health Organization. Statement on the second meeting of the International Health  
43 342 Regulations (2005) Emergency Committee regarding the outbreak of novel coronavirus  
44 343 (2019-nCoV). Geneva: WHO; 2020 [Available from: [https://www.who.int/news-](https://www.who.int/news-room/detail/30-01-2020-statement-on-the-second-meeting-of-the-international-health-regulations-(2005)-emergency-committee-regarding-the-outbreak-of-novel-coronavirus-(2019-ncov))  
45 344 [room/detail/30-01-2020-statement-on-the-second-meeting-of-the-international-health-](https://www.who.int/news-room/detail/30-01-2020-statement-on-the-second-meeting-of-the-international-health-regulations-(2005)-emergency-committee-regarding-the-outbreak-of-novel-coronavirus-(2019-ncov))  
46 345 [regulations-\(2005\)-emergency-committee-regarding-the-outbreak-of-novel-coronavirus-](https://www.who.int/news-room/detail/30-01-2020-statement-on-the-second-meeting-of-the-international-health-regulations-(2005)-emergency-committee-regarding-the-outbreak-of-novel-coronavirus-(2019-ncov))  
47 346 [regulations-\(2019-ncov\)](https://www.who.int/news-room/detail/30-01-2020-statement-on-the-second-meeting-of-the-international-health-regulations-(2005)-emergency-committee-regarding-the-outbreak-of-novel-coronavirus-(2019-ncov)).  
48  
49 347 6. Meng X, Deng Y, Dai Z, et al. COVID-19 and anosmia: A review based on up-to-date knowledge.  
50 348 *Am J Otolaryngol* 2020;41(5):102581-81. doi: 10.1016/j.amjoto.2020.102581 [published  
51 349 Online First: 06/02]  
52  
53 350 7. European Centre for Disease Prevention and Control (ECDC). COVID-19 situation update  
54 351 worldwide, as of week 12, updated 1 April 2021 2021 [Available from:  
55  
56  
57  
58  
59  
60

- 1  
2  
3 352 <https://www.ecdc.europa.eu/en/geographical-distribution-2019-ncov-cases> accessed 8th April  
4 353 2021.  
5  
6 354 8. European Centre for Disease Prevention and Control (ECDC). Surveillance of COVID-19 at  
7 355 longterm care facilities in the EU/EEA. Technical Report, 2020.  
8  
9 356 9. ECDC Public Health Emergency Team, Danis K, Fonteneau L, et al. High impact of COVID-19 in  
10 357 long-term care facilities, suggestion for monitoring in the EU/EEA, May 2020. *Euro Surveill*  
11 358 2020;25(22):2000956. doi: 10.2807/1560-7917.ES.2020.25.22.2000956  
12  
13 359 10. Mueller AL, McNamara MS, Sinclair DA. Why does COVID-19 disproportionately affect older  
14 360 people? *Aging* 2020;12(10):9959-81. doi: 10.18632/aging.103344 [published Online First:  
15 361 2020/05/30]  
16  
17 362 11. United Nations. Policy Brief: The Impact of COVID-19 on older persons, 2020.  
18  
19 363 12. World Health Organization. Policy Brief: The Impact of COVID-19 on older persons, 2020.  
20  
21 364 13. Frazer K, Mitchell L, Stokes D, et al. Systematic review of measures to protect older people in  
22 365 long term care facilities from COVID 19. *PROSPERO: International prospective register of*  
23 366 *systematic reviews* 2020;CRD42020191569  
24  
25 367 14. Moher D, Liberati A, Tetzlaff J, et al. Preferred Reporting Items for Systematic Reviews and  
26 368 Meta-Analyses: The PRISMA Statement. *PLoS Medicine* 2009;6(7):e1000097. doi:  
27 369 10.1371/journal.pmed.1000097  
28  
29 370 15. Hong QN, Fàbregues S, Bartlett G, et al. The Mixed Methods Appraisal Tool (MMAT) version  
30 371 2018 for information professionals and researchers. *Education for Information* 2018;34:285-  
31 372 91. doi: 10.3233/EFI-180221  
32  
33 373 16. Campbell M, McKenzie JE, Sowden A, et al. Synthesis without meta-analysis (SWiM) in  
34 374 systematic reviews: reporting guideline. *BMJ* 2020;368:l6890. doi: 10.1136/bmj.l6890  
35  
36 375 17. Abrams HR, Loomer L, Gandhi A, et al. Characteristics of U.S. Nursing Homes with COVID-19  
37 376 Cases. *Journal of the American Geriatrics Society* 2020 doi: 10.1111/jgs.16661  
38  
39 377 18. Arons MM, Hatfield KM, Reddy SC, et al. Presymptomatic SARS-CoV-2 infections and  
40 378 transmission in a skilled nursing facility. *New England Journal of Medicine*  
41 379 2020;382(22):2081-90. doi: 10.1056/NEJMoa2008457  
42  
43 380 19. Blackman C, Farber S, Feifer RA, et al. An Illustration of SARS-CoV-2 Dissemination Within a  
44 381 Skilled Nursing Facility Using Heat Maps. *Journal of the American Geriatrics Society*  
45 382 2020;68(10):2174-78. doi: 10.1111/jgs.16642  
46  
47 383 20. Dora AV, Winnett A, Jatt LP, et al. Universal and Serial Laboratory Testing for SARS-CoV-2 at a  
48 384 Long-Term Care Skilled Nursing Facility for Veterans - Los Angeles, California, 2020.  
49 385 *MMWR Morbidity and mortality weekly report* 2020;69(21):651-55. doi:  
50 386 10.15585/mmwr.mm6921e1  
51  
52  
53  
54  
55  
56  
57  
58  
59  
60



- 1  
2  
3 387 21. Eckardt P, Guran R, Hennemyre J, et al. Hospital affiliated long term care facility COVID-19  
4 388 containment strategy by using prevalence testing and infection control best practices.  
5 389 *American Journal of Infection Control* 2020 doi: <https://doi.org/10.1016/j.ajic.2020.06.215>  
6  
7 390 22. Feaster M, Goh Y-Y. High Proportion of Asymptomatic SARS-CoV-2 Infections in 9 Long-Term  
8 391 Care Facilities, Pasadena, California, USA, April 2020. *Emerging Infectious Disease journal*  
9 392 2020;26(10):2416. doi: 10.3201/eid2610.202694  
10  
11 393 23. Graham N, Junghans C, Downes R, et al. SARS-CoV-2 infection, clinical features and outcome of  
12 394 COVID-19 in United Kingdom nursing homes. *J Infect* 2020 doi: 10.1016/j.jinf.2020.05.073  
13 395 [published Online First: 2020/06/07]  
14  
15 396 24. Hand J, Rose EB, Salinas A, et al. Severe Respiratory Illness Outbreak Associated with Human  
16 397 Coronavirus NL63 in a Long-Term Care Facility. *Emerg Infect Dis* 2018;24(10):1964-66. doi:  
17 398 10.3201/eid2410.180862 [published Online First: 2018/09/19]  
18  
19 399 25. Harris DA, Archbald-Pannone L, Kaur J, et al. Rapid Telehealth-Centered Response to COVID-  
20 400 19 Outbreaks in Postacute and Long-Term Care Facilities. *Telemedicine and e-Health*  
21 401 2020;0(0):null. doi: 10.1089/tmj.2020.0236  
22  
23 402 26. Kimball A, Hatfield KM, Arons M, et al. Asymptomatic and Presymptomatic SARS-CoV-2  
24 403 Infections in Residents of a Long-Term Care Skilled Nursing Facility - King County,  
25 404 Washington, March 2020. *MMWR Morbidity and mortality weekly report* 2020;69(13):377-  
26 405 81. doi: 10.15585/mmwr.mm6913e1  
27  
28 406 27. Lennon NJ, Bhattacharyya RP, Mina MJ, et al. Comparison of viral levels in individuals with or  
29 407 without symptoms at time of COVID-19 testing among 32,480 residents and staff of nursing  
30 408 homes and assisted living facilities in Massachusetts. *medRxiv* 2020:2020.07.20.20157792.  
31 409 doi: 10.1101/2020.07.20.20157792  
32  
33 410 28. Louie JK, Scott HM, DuBois A, et al. Lessons from Mass-Testing for COVID-19 in Long Term  
34 411 Care Facilities for the Elderly in San Francisco. *Clinical Infectious Diseases* 2020 doi:  
35 412 10.1093/cid/ciaa1020  
36  
37 413 29. McMichael TM, Currie DW, Clark S, et al. Epidemiology of covid-19 in a long-term care facility  
38 414 in King County, Washington. *New England Journal of Medicine* 2020;382(21):2008-11. doi:  
39 415 10.1056/NEJMoa2005412  
40  
41 416 30. Patel MC, Chaisson LH, Borgetti S, et al. Asymptomatic SARS-CoV-2 Infection and COVID-19  
42 417 Mortality During an Outbreak Investigation in a Skilled Nursing Facility. *Clinical Infectious*  
43 418 *Diseases* 2020 doi: 10.1093/cid/ciaa763  
44  
45 419 31. Quicke K, Gallichote E, Sexton N, et al. Longitudinal Surveillance for SARS-CoV-2 RNA  
46 420 Among Asymptomatic Staff in Five Colorado Skilled Nursing Facilities: Epidemiologic,  
47 421 Virologic and Sequence Analysis. *medRxiv* 2020:2020.06.08.20125989. doi:  
48 422 10.1101/2020.06.08.20125989  
49  
50  
51  
52  
53  
54  
55  
56  
57  
58  
59  
60

- 1  
2  
3 423 32. Quigley DD, Dick A, Agarwal M, et al. COVID-19 Preparedness in Nursing Homes in the Midst  
4 of the Pandemic. *Journal of the American Geriatrics Society* 2020;68(6):1164-66. doi:  
5 424 10.1111/jgs.16520  
6 425  
7  
8 426 33. Roxby AC, Greninger AL, Hatfield KM, et al. Outbreak Investigation of COVID-19 among  
9 Residents and Staff of an Independent and Assisted Living Community for Older Adults in  
10 427 Seattle, Washington. *JAMA Internal Medicine* 2020 doi: 10.1001/jamainternmed.2020.2233  
11 428  
12  
13 429 34. Sanchez GV, Biedron C, Fink LR, et al. Initial and Repeated Point Prevalence Surveys to Inform  
14 430 SARS-CoV-2 Infection Prevention in 26 Skilled Nursing Facilities — Detroit, Michigan,  
15 431 March–May 2020. *MMWR Morb Mortal Wkly Rep* 2020;69:882-86. doi:  
16 432 <http://dx.doi.org/10.15585/mmwr.mm6927e1external>  
17  
18  
19 433 35. Telford CT, Onwubiko U, Holland D, et al. Mass Screening for SARS-CoV-2 Infection among  
20 434 Residents and Staff in Twenty-eight Long-term Care Facilities in Fulton County, Georgia.  
21 435 *medRxiv* 2020:2020.07.01.20144162. doi: 10.1101/2020.07.01.20144162  
22  
23  
24 436 36. Unruh MA, Yun H, Zhang Y, et al. Nursing Home Characteristics Associated With COVID-19  
25 437 Deaths in Connecticut, New Jersey, and New York. *Journal of the American Medical*  
26 438 *Directors Association* 2020;21(7):1001-03. doi: <https://doi.org/10.1016/j.jamda.2020.06.019>  
27  
28  
29 439 37. Brainard JS, Rushton S, Winters T, et al. Introduction to and spread of COVID-19 in care homes  
30 440 in Norfolk, UK. *Journal of Public Health* 2020;fdaa218 doi: 10.1093/pubmed/fdaa218  
31  
32 441 38. Burton JK, Bayne G, Evans C, et al. Evolution and impact of COVID-19 outbreaks in care homes:  
33 442 population analysis in 189 care homes in one geographic region of the UK. *Lancet Healthy*  
34 443 *Longevity* 2020;1(1):e21-31. doi: 10.1016/S2666-7568(20)30012-X  
35  
36 444 39. Dutey-Magni PF, Williams H, Jhass A, et al. Covid-19 infection and attributable mortality in UK  
37 445 Long Term Care Facilities: Cohort study using active surveillance and electronic records  
38 446 (March-June 2020). *Age and Ageing* 2021;afab060 doi: 10.1093/ageing/afab060  
39  
40 447 40. Office for National Statistics. Impact of coronavirus in care homes in England: 26 May to 19 June  
41 448 2020. They Vivaldi study., 2020.  
42  
43 449 41. Stow D, Barker RO, Matthews FE, et al. National Early Warning Scores (NEWS / NEWS2) and  
44 450 COVID-19 deaths in care homes: a longitudinal ecological study. *medRxiv*  
45 451 2020:2020.06.15.20131516. doi: 10.1101/2020.06.15.20131516  
46  
47  
48 452 42. Brown KA, Jones A, Daneman N, et al. Association Between Nursing Home Crowding and  
49 453 COVID-19 Infection and Mortality in Ontario, Canada. *JAMA Internal Medicine*  
50 454 2021;181(2):229-36. doi: 10.1001/jamainternmed.2020.6466  
51  
52  
53 455 43. Fisman DN, Bogoch I, Lapointe-Shaw L, et al. Risk Factors Associated With Mortality Among  
54 456 Residents With Coronavirus Disease 2019 (COVID-19) in Long-term Care Facilities in  
55 457 Ontario, Canada. *JAMA Network Open* 2020;3(7):e2015957-e57. doi:  
56 458 10.1001/jamanetworkopen.2020.15957  
57  
58  
59  
60



- 1  
2  
3 459 44. Stall NM, Jones A, Brown KA, et al. For-profit long-term care homes and the risk of COVID-19  
4 460 outbreaks and resident deaths. *CMAJ : Canadian Medical Association journal = journal de*  
5 461 *l'Association medicale canadienne* 2020;192(33):E946-e55. doi: 10.1503/cmaj.201197  
6 462 [published Online First: 2020/07/24]  
7  
8 463 45. Guery R, Delaye C, Brule N, et al. Limited effectiveness of systematic screening by  
9 464 nasopharyngeal RT-PCR of medicalized nursing home staff after a first case of COVID-19 in  
10 465 a resident. *Médecine et Maladies Infectieuses* 2020 doi:  
11 466 <https://doi.org/10.1016/j.medmal.2020.04.020>  
12  
13 467 46. Sacco G, Foucault G, Briere O, et al. COVID-19 in seniors: Findings and lessons from mass  
14 468 screening in a nursing home. *Maturitas* 2020;141:46-52. doi:  
15 469 <https://doi.org/10.1016/j.maturitas.2020.06.023>  
16  
17 470 47. Heung LC, Li T, Mak SK, et al. Prevalence of subclinical infection and transmission of severe  
18 471 acute respiratory syndrome (SARS) in a residential care home for the elderly. *Hong Kong*  
19 472 *Med J* 2006;12(3):201-7. [published Online First: 2006/06/09]  
20  
21 473 48. Ho WW, Hui E, Kwok TC, et al. An outbreak of severe acute respiratory syndrome in a nursing  
22 474 home. *J Am Geriatr Soc* 2003;51(10):1504-5. doi: 10.1046/j.1532-5415.2003.514841.x  
23 475 [published Online First: 2003/09/27]  
24  
25 476 49. Hoxha A, Wyndham-Thomas C, Klamer S, et al. Asymptomatic SARS-CoV-2 infection in  
26 477 Belgian long-term care facilities. *The Lancet Infectious Diseases* 2020 doi:  
27 478 [https://doi.org/10.1016/S1473-3099\(20\)30560-0](https://doi.org/10.1016/S1473-3099(20)30560-0)  
28  
29 479 50. Klein A, Edler C, Fitzek A, et al. Der erste COVID-19-Hotspot in einer Hamburger  
30 480 Senioreneinrichtung. *Rechtsmedizin* 2020;30(5):325-31. doi: 10.1007/s00194-020-00404-1  
31  
32 481 51. Kennelly SP, Dyer AH, Noonan C, et al. Asymptomatic carriage rates and case-fatality of SARS-  
33 482 CoV-2 infection in residents and staff in Irish nursing homes. *Age and Ageing* 2021;50(1):49-  
34 483 54. doi: 10.1093/ageing/afaa220  
35  
36 484 52. Iritani O, Okuno T, Hama D, et al. Clusters of COVID-19 in long-term care hospitals and facilities  
37 485 in Japan from 16 January to 9 May 2020. *Geriatrics & Gerontology International*  
38 486 2020;20(7):715-19. doi: 10.1111/ggi.13973  
39  
40 487 53. Kim T. Improving Preparedness for and Response to Coronavirus Disease 19 (COVID-19) in  
41 488 Long-Term Care Hospitals in the Korea. *Infect Chemother* 2020 [published Online First:  
42 489 2020/05/15]  
43  
44 490 54. Borrás-Bermejo B, Martínez-Gómez X, San Miguel MG, et al. Asymptomatic SARS-CoV-2  
45 491 Infection in Nursing Homes, Barcelona, Spain, April 2020. *Emerging Infectious Disease*  
46 492 *journal* 2020;26(9):2281. doi: 10.3201/eid2609.202603  
47  
48 493 55. Kelleher CC, Doherty B, Donnelly P, et al. COVID-19 Nursing Homes Expert Panel. Examination  
49 494 of Measures to 2021. Report to the Minister for Health, 2020.  
50  
51  
52  
53  
54  
55  
56  
57  
58  
59  
60

- 1  
2  
3 495 56. Sepulveda ER, Stall NM, Sinha SK. A Comparison of COVID-19 Mortality Rates Among Long-  
4 496 Term Care Residents in 12 OECD Countries. *Journal of the American Medical Directors*  
5 497 *Association* 2020;21(11):1572-74.e3. doi: 10.1016/j.jamda.2020.08.039 [published Online  
6 498 First: 09/12]  
7  
8 499 57. Lurie N, Saville M, Hatchett R, et al. Developing Covid-19 Vaccines at Pandemic Speed. *New*  
9 500 *England Journal of Medicine* 2020;382(21):1969-73. doi: 10.1056/NEJMp2005630  
10  
11 501 58. Public Health England. Impact of COVID-19 vaccines on mortality in England December 2020 to  
12 502 February 2021. London, 2021.  
13  
14 503 59. Montano M. Pressing Questions and Challenges in the HIV-1 and SARS-CoV-2 Syndemic. *AIDS*  
15 504 *Research and Human Retroviruses* 2021;Ahead of Print doi: 10.1089/aid.2021.0005  
16  
17 505 60. Institute of Medicine (IOM). Learning from SARS: Preparing for the Next Disease Outbreak:  
18 506 Workshop Summary. In: Knobler S, Mahmoud A, Lemon S, et al., eds. Learning from SARS:  
19 507 Preparing for the Next Disease Outbreak: Workshop Summary. Washington (DC): National  
20 508 Academies Press (US), Copyright © 2004, National Academy of Sciences. 2004.  
21  
22 509 61. Salcher-Konrad M, Jhass A, Naci H, et al. COVID-19 related mortality and spread of disease in  
23 510 long-term care: a living systematic review of emerging evidence. *medRxiv*  
24 511 2020:2020.06.09.20125237. doi: 10.1101/2020.06.09.20125237  
25  
26 512 62. World Health Organization. Preventing and managing COVID-19 across long-term care services:  
27 513 policy brief. Geneva, 2020.  
28  
29  
30  
31  
32  
33  
34 514  
35  
36 515  
37  
38  
39 516  
40  
41  
42 517  
43  
44  
45 518  
46  
47  
48 519  
49  
50  
51 520  
52  
53 521  
54  
55  
56 522  
57  
58  
59 523  
60

1  
2  
3  
4  
5  
6  
7  
8  
9  
10  
11  
12  
13  
14  
15  
16  
17  
18  
19  
20  
21  
22  
23  
24  
25  
26  
27  
28  
29  
30  
31  
32  
33  
34  
35  
36  
37  
38  
39  
40  
41  
42  
43  
44  
45  
46  
47  
48  
49  
50  
51  
52  
53  
54  
55  
56  
57  
58  
59  
60

524

525

526

527

528

529

530

531

**Figure legends**

532

Figure 1. PRISMA flowchart

For peer review only



only

1  
2  
3  
4 Pubmed

5  
6 Search #1

7  
8 "Residential facilit\*" OR "Residential aged care" OR Convalescent home\* OR "Nursing  
9 Home\*" OR "Homes for the aged" OR "Housing for the elderly" OR "Skilled nursing facilit\*" OR  
10 "long term care" OR "Longterm care" OR Home\* for the aged OR "Old Age Home\*" OR  
11 "long-term care" OR "Nursing Homes"[Mesh] OR "long-term care"[MeSH] OR "Residential  
12 Facilities"[Mesh] OR "Housing for the Elderly"[Mesh]

13  
14  
15 213,035 Results

16  
17 Intervention

18  
19 Search #2

20  
21  
22 ("Infection control" OR Infection prevention and control\* OR "Patient Safety" OR "Patient  
23 harm" OR "Patient risk" OR "Health care Delivery" OR transmission OR body substance  
24 isolation\* OR physical barrier\* OR physical intervention\* OR physical protection\* OR  
25 personal protection\* OR person protection\* OR BSI OR IPC OR N95 OR ffp1 OR ffp3 OR  
26 ffp2 OR transmission\* OR contamination\* OR shedding OR fomite\* OR gap\* OR non-pharm  
27 intervention\* OR non-pharmaceutical intervention\* OR Shield OR N99 OR N97 OR  
28 Ventilator\* OR Space OR spacing or separation OR "Communicable Disease Control" OR  
29 "Primary Prevention" OR facemask\* OR face mask\* OR face-mask\* OR "Delivery of Health  
30 Care" OR "Disease transmission" OR "Infectious Disease Transmission" OR PPE OR  
31 "Personal Protective Equipment" OR mask\* OR virucide\* OR antiviral agent\* OR  
32 Handwashing OR "Hand washing" OR "Hand Disinfection" OR "hand hygiene" OR distancing  
33 OR distances OR aerosol-generating procedure\* OR patient isolation\* OR patient isolator\*  
34 OR person isolator\* OR "individual isolation" OR individual isolator\* OR filtering face piece\*  
35 OR face protection\* OR face shield\* OR face protective device\* OR face protective gear\*  
36 OR eye protection\* OR eye shield\* OR eye protective device\* OR eye protective gear\* OR  
37 Eye mask\* OR airborne precaution\* OR droplet precaution\* OR safety supply OR safety  
38 supplies\* OR safety device\* OR safety equipment\* OR safety measure\* OR safety gear\* OR  
39 protective supply\* OR protective supplies\* OR protective device\* OR protective equipment\*  
40 OR protective measure\* OR protective gear\* OR "personal isolation" OR respirator\* OR  
41 respiratory protection\* OR respiratory protective device\* OR "respiratory protective supply"  
42 OR "respiratory protective supplies" OR "respiratory protective equipment" OR "respiratory  
43 protective gear" OR "safely equipped" OR meter OR metre OR foot OR feet OR meters OR  
44 metres OR head cover\* OR face cover\* OR eye cover\* OR goggle\* OR protective clothing\*  
45 OR "Infection Control"[Mesh] OR "Personal Protective Equipment"[Mesh] OR "Hand  
46 Disinfection"[Mesh] OR "Communicable Disease Control"[Mesh:NoExp] OR "Disease  
47 Transmission, Infectious"[Mesh] OR "Primary Prevention"[Mesh] OR "Delivery of Health  
48 Care"[Mesh:NoExp] OR "Fomites"[Mesh] OR "Ventilators, Mechanical"[Mesh] OR  
49 "Communicable Disease Control"[Mesh] OR "Primary Prevention"[Mesh] OR "Delivery of  
50 Health Care"[Mesh] OR "Patient Isolation"[Mesh] OR "Patient Safety"[Mesh] OR "Patient  
51 Harm"[Mesh])

52  
53  
54  
55  
56  
57  
58  
59 5,741,706 results

1  
2  
3 And

4  
5 Search #3

6  
7 (Coronavirus\* OR "Corona virus" OR Betacoronavirus or Beta-coronavirus OR Corona\* OR  
8 coronaviral OR coronaviridae OR coronavirida OR coronaviridae OR coronaviridea OR  
9 coronaviridae OR coronavirinae OR coronavirion OR coronavirions OR coronavirose OR  
10 coronavirus OR COVIDOR SARS OR SARS-CoV OR "Middle East respiratory syndrome"  
11 OR MERS OR MERS-CoV OR "Severe Acute Respiratory Syndrome" OR "severe acute  
12 respiratory pneumonia outbreak" OR 2019-nCoV OR nCoV OR COVID-2019 OR "COVID  
13 2019" OR cov2 OR Covid19 OR COVID-19 OR COVID 19 OR SARS-CoV\* OR  
14 coronaviridae OR "corona virus" OR "SARS-CoV-2" OR "sars cov2" OR "SARS-CoV-19" OR  
15 2019nCoV OR "SARS-CoV" OR SARSCOV2 OR "2019 coronavirus" OR "SARS2" OR  
16 "2019 corona virus" OR covid19 OR "novel corona virus" OR "new corona virus" OR "novel  
17 coronavirus" OR "new coronavirus" OR "coronavirus infection" OR "nouveau coronavirus"  
18 OR "COVID-19" [Supplementary Concept] OR "severe acute respiratory syndrome  
19 coronavirus 2" [Supplementary Concept] OR "Coronavirus Infections"[Mesh] OR  
20 "Coronavirus"[Mesh] OR "Middle East Respiratory Syndrome Coronavirus"[Mesh] OR  
21 "Coronavirus Infections"[Mesh] OR "SARS Virus"[Mesh] OR "Betacoronavirus"[Mesh])

22  
23  
24  
25  
26  
27  
28  
29 595,661 results

30  
31 Search #4 = #2 AND #3 116,217 results

32  
33 Outcomes

34  
35 Search #5

36  
37 Mortality OR "Death rate\*" OR "Mortality Rate\*" OR Morbidity OR "Risk of Infection" OR  
38 "infection risk" OR "Mortality"[Mesh:NoExp] OR "Morbidity"[Mesh]

39  
40  
41 3,204,107 results

42  
43 Search #6 = #1 AND #4 AND #5

44  
45  
46  
47  
48  
49  
50  
51  
52 EMBASE

53  
54 Search #1

55  
56 "Residential facilit\*" OR "Residential aged care" OR "Convalescent home\*" OR "Nursing  
57 Home\*" OR "Homes for the aged" OR "Housing for the elderly" OR "Skilled nursing facilit\*"  
58 OR "long term care" OR "Longterm care" OR "Home\* for the aged" OR "Old Age Home\*" OR

1  
2  
3 “long-term care” OR 'residential home'/exp OR 'nursing home'/exp OR 'home for the  
4 aged'/exp OR 'skilled nursing facility'/exp OR 'long term care'/de

5  
6 212,416 results

7  
8 Intervention

9  
10 Search #2

11  
12  
13 (“Infection control” OR “Infection prevention and control\*” OR “Patient Safety” OR “Patient  
14 harm” OR “Patient risk” OR “body substance isolation\*” OR “physical barrier\*” OR “physical  
15 intervention\*” OR “physical protection\*” OR “personal protection\*” OR “person protection\*”  
16 OR BSI OR IPC OR N95 OR ffp1 OR ffp3 OR ffp2 OR transmission\* OR contamination\* OR  
17 shedding OR fomite\* OR gap\* OR “non-pharm intervention\*” OR “non-pharmaceutical  
18 intervention\*” OR Shield OR N99 OR N97 OR Ventilator\* OR Space OR spacing OR  
19 separation OR “Communicable Disease Control” OR "Primary Prevention" OR facemask\*  
20 OR face-mask\* OR “face mask\*” OR "Delivery of Health Care" OR “Health Care Delivery”  
21 OR “Disease transmission” OR “Infectious Disease Transmission” OR PPE OR “Personal  
22 Protective Equipment” OR mask\* OR virucide\* OR antiviral agent\* OR Handwashing OR  
23 “Hand washing” OR “Hand Disinfection” OR “hand hygiene” OR distancing OR distances OR  
24 “aerosol-generating procedure\*” OR “patient isolation\*” OR “patient isolator\*” OR “person  
25 isolator\*” OR “individual isolation” OR “individual isolator\*” OR “filtering face piece\*” OR “face  
26 protection\*” OR “face shield\*” OR “face protective device\*” OR “face protective gear\*” OR  
27 “eye protection\*” OR “eye shield\*” OR “eye protective device\*” OR “eye protective gear\*” OR  
28 “Eye mask\*” OR “airborne precaution\*” OR “droplet precaution\*” OR “safety supply” OR  
29 “safety supplies\*” OR “safety device\*” OR “safety equipment\*” OR “safety measure\*” OR  
30 “safety gear\*” OR “protective supply\*” OR “protective supplies\*” OR “protective device\*” OR  
31 “protective equipment\*” OR “protective measure\*” OR “protective gear\*” OR “personal  
32 isolation” OR respirator\* OR “respiratory protection\*” OR “respiratory protective device\*” OR  
33 “respiratory protective supply” OR “respiratory protective supplies” OR “respiratory protective  
34 equipment” OR “respiratory protective gear” OR “safely equipped” OR meter OR metre OR  
35 foot OR feet OR meters OR metres OR “head cover\*” OR “face cover\*” OR “eye cover\*” OR  
36 goggle\* OR “protective clothing\*” OR 'infection control'/exp OR 'patient safety'/exp OR  
37 'disease transmission'/exp OR 'contamination'/exp OR 'shedding'/exp OR 'fomite'/exp OR  
38 'shield'/exp OR 'ventilator'/exp OR 'space'/exp OR 'separation'/exp OR 'communicable  
39 disease control'/exp OR 'primary prevention'/exp OR 'face mask'/exp OR 'health care  
40 delivery'/exp OR 'protective equipment'/exp OR 'mask'/exp OR 'antivirus agent'/exp OR  
41 'hand washing'/exp OR 'patient isolation'/exp OR 'face shield'/exp OR 'eye protective  
42 device'/exp OR 'ventilator'/exp OR 'respiratory protection'/exp OR 'goggle'/exp OR  
43 'protective clothing'/exp)

44  
45  
46 6,030,646 results

47  
48 And

49  
50 Search #3

51  
52  
53 (Coronavirus\* OR “Corona virus” OR Betacoronavirus or Beta-coronavirus OR Corona\* OR  
54 coronaviral OR coronaviridae OR coronavirida OR coronaviridae OR coronaviridea OR  
55  
56  
57  
58  
59  
60



1  
2  
3 coronaviridae OR coronavirinae OR coronavirion OR coronavirions OR coronavirose OR  
4 coronavirus OR coronaviruses OR coronavirus OR coronaviruses OR coronaviruses OR  
5 coronaviruslike OR coronaviser OR coronaviurs OR coronaviuses OR coronavrius OR  
6 coronavirus OR COVIDOR SARS OR SARS-CoV OR "Middle East respiratory syndrome"  
7 OR MERS OR MERS-CoV OR "Severe Acute Respiratory Syndrome" OR "severe acute  
8 respiratory pneumonia outbreak" OR 2019-nCoV OR nCoV OR COVID-2019 OR "COVID  
9 2019" OR cov2 OR Covid19 OR COVID-19 OR COVID 19 OR SARS-CoV\* OR "SARS-CoV-  
10 2" OR "sars cov2" OR "SARS-CoV-19" OR 2019nCoV OR "SARS-CoV" OR SARSCOV2 OR  
11 "2019 coronavirus" OR "SARS2" OR "2019 corona virus" OR covid19 OR "novel corona  
12 virus" OR "new corona virus" OR "novel coronavirus" OR "new coronavirus" OR "coronavirus  
13 infection" OR "nouveau coronavirus" OR 'Coronavirinae'/exp OR 'Betacoronavirus'/exp OR  
14 'severe acute respiratory syndrome'/exp OR 'covid 19'/exp OR 'Coronavirus infection'/exp)

15  
16  
17  
18  
19 45,801 results

20  
21 Search #4 = #2 AND #3 27,921 results

22  
23 Outcomes

24  
25 Search #5

26  
27 Mortality OR "Death rate\*" OR "Mortality Rate\*" OR Morbidity OR "Risk of Infection" OR  
28 "Infection risk" OR 'mortality'/exp OR 'mortality rate'/exp OR 'morbidity'/exp OR 'infection  
29 risk'/exp

30  
31  
32 1,862,861 results

33  
34 Search #6 = #1 AND #4 AND #5

35  
36  
37  
38  
39  
40  
41 CINAHL

42  
43 Search #1

44  
45 "Residential facilit\*" OR "Residential aged care" OR "Convalescent home\*" OR "Nursing  
46 Home\*" OR "Homes for the aged" OR "Housing for the elderly" OR "Skilled nursing facilit\*"  
47 OR "long term care" OR "Longterm care" OR "Home\* for the aged" OR "Old Age Home\*" OR  
48 "long-term care" OR (MH "Residential Facilities") OR (MH "Nursing Homes+") OR (MH  
49 "Housing for the Elderly") OR (MH "Long Term Care")

50  
51  
52 83,231 results

53  
54 Intervention

55  
56 Search #2



("Infection control" OR "Infection prevention and control\*" OR "Patient Safety" OR "Patient harm" OR "Patient risk" OR "body substance isolation\*" OR "physical barrier\*" OR "physical intervention\*" OR "physical protection\*" OR "personal protection\*" OR "person protection\*" OR BSI OR IPC OR N95 OR ffp1 OR ffp3 OR ffp2 OR transmission\* OR contamination\* OR shedding OR fomite\* OR gap\* OR "non-pharm intervention\*" OR "non-pharmaceutical intervention\*" OR Shield OR N99 OR N97 OR Ventilator\* OR Space OR spacing OR separation OR "Communicable Disease Control" OR "Primary Prevention" OR facemask\* OR face-mask\* OR "face mask\*" OR "Delivery of Health Care" OR "Health Care Delivery" OR "Disease transmission" OR "Infectious Disease Transmission" OR PPE OR "Personal Protective Equipment" OR mask\* OR virucide\* OR antiviral agent\* OR Handwashing OR "Hand washing" OR "Hand Disinfection" OR "hand hygiene" OR distancing OR distances OR "aerosol-generating procedure\*" OR "patient isolation\*" OR "patient isolator\*" OR "person isolator\*" OR "individual isolation" OR "individual isolator\*" OR "filtering face piece\*" OR "face protection\*" OR "face shield\*" OR "face protective device\*" OR "face protective gear\*" OR "eye protection\*" OR "eye shield\*" OR "eye protective device\*" OR "eye protective gear\*" OR "Eye mask\*" OR "airborne precaution\*" OR "droplet precaution\*" OR "safety supply" OR "safety supplies\*" OR "safety device\*" OR "safety equipment\*" OR "safety measure\*" OR "safety gear\*" OR "protective supply\*" OR "protective supplies\*" OR "protective device\*" OR "protective equipment\*" OR "protective measure\*" OR "protective gear\*" OR "personal isolation" OR respirator\* OR "respiratory protection\*" OR "respiratory protective device\*" OR "respiratory protective supply" OR "respiratory protective supplies" OR "respiratory protective equipment" OR "respiratory protective gear" OR "safely equipped" OR meter OR metre OR foot OR feet OR meters OR metres OR "head cover\*" OR "face cover\*" OR "eye cover\*" OR goggle\* OR "protective clothing\*" OR (MH "Infection Control") OR (MH "Handwashing") OR (MH "Patient Safety") OR (MH "Disease Transmission+") OR (MH "Microbial Contamination") OR (MH "Ventilators, Mechanical") OR (MH "Masks") OR (MH "Health Care Delivery+") OR (MH "Protective Devices+") OR (MH "Patient Isolation+")

917,391 results

And

Search #3

(Coronavirus\* OR "Corona virus" OR Betacoronavirus or Beta-coronavirus OR Corona\* OR coronaviral OR coronaviridae OR coronavirida OR coronaviridae OR coronaviridea OR coronaviridae OR coronavirinae OR coronavirion OR coronavirions OR coronaviruses OR coronavirus OR coronavirues OR coronavirusce OR coronaviruse OR coronaviruses OR coronaviruslike OR coronaviser OR coronavirs OR coronaviruses OR coronavirius OR coronavirius OR COVIDOR SARS OR SARS-CoV OR "Middle East respiratory syndrome" OR MERS OR MERS-CoV OR "Severe Acute Respiratory Syndrome" OR "severe acute respiratory pneumonia outbreak" OR 2019-nCoV OR nCoV OR COVID-2019 OR "COVID 2019" OR cov2 OR Covid19 OR COVID-19 OR COVID 19 OR SARS-CoV\* OR OR "SARS-CoV-2" OR "sars cov2" OR "SARS-CoV-19" OR 2019nCoV OR "SARS-CoV" OR SARSCOV2 OR "2019 coronavirus" OR "SARS2" OR "2019 corona virus" OR covid19 OR "novel corona virus" OR "new corona virus" OR "novel coronavirus" OR "new coronavirus" OR "coronavirus infection" OR "nouveau coronavirus" OR (MH "Coronavirus+") OR (MH "Coronaviridae Infections+" ) )

1  
2  
3 141,416 results  
4

5 Search #4 = #2 AND #3 15,251 results  
6

7 Outcomes  
8

9 Search #5  
10

11 Mortality OR "Death rate\*" OR "Mortality Rate\*" OR Morbidity OR "Risk of Infection" OR  
12 "Infection risk" OR (MH "Mortality+") OR (MH "Morbidity+")  
13  
14

15 501,502 results  
16

17 Search #6 = #1 AND #4 AND #5  
18  
19

20  
21  
22 Cochrane library  
23  
24  
25

26 #1 MeSH descriptor: [Coronavirus Infections] explode all trees 179  
27

28 #2 MeSH descriptor: [Coronavirus] explode all trees 18  
29

30  
31 #3 Coronavirus OR "Corona virus" OR Betacoronavirus or Beta-coronavirus OR Corona  
32 OR coronaviral OR coronavirdae OR coronavirida OR coronaviridae OR coronaviridea OR  
33 coronaviridae OR coronavirinae OR coronavirion OR coronavirions OR coronaviruses OR  
34 coronavirus OR coronavirues OR coronavirusce OR coronaviruse OR coronaviruses OR  
35 coronaviruslike OR coronaviser OR coronavirs OR coronaviruses OR coronavirus OR  
36 coronavirus OR COVIDOR SARS OR SARS-CoV OR "Middle East respiratory syndrome"  
37 OR MERS OR MERS-CoV OR "Severe Acute Respiratory Syndrome" OR "severe acute  
38 respiratory pneumonia outbreak" OR nCoV OR COVID-2019 OR "COVID 2019" OR cov2  
39 OR Covid19 OR COVID-19 OR COVID 19 OR SARS-CoV\* OR coronaviridae OR "corona  
40 virus" OR "SARS-CoV-2" OR "sars cov2" OR "SARS-CoV-19" OR 2019nCoV OR "SARS-  
41 CoV" OR SARSCOV2 OR "2019 coronavirus" OR "SARS2" OR "2019 corona virus" OR  
42 covid19 OR "novel corona virus" OR "new corona virus" OR "novel coronavirus" OR "new  
43 coronavirus" OR "coronavirus infection" OR "nouveau coronavirus" 1173  
44  
45  
46

47 #4 #1 OR #2 OR #3 1173  
48

49  
50 #5 "Infection control" OR Infection prevention and control\* OR "Patient Safety" OR  
51 "Patient harm" OR "Patient risk" OR "Health care Delivery" OR transmission OR body  
52 substance isolation\* OR physical barrier\* OR physical intervention\* OR physical protection\*  
53 OR personal protection\* OR person protection\* OR BSI OR IPC OR N95 OR ffp1 OR ffp3  
54 OR ffp2 OR transmission\* OR contamination\* OR shedding OR fomite\* OR gap\* OR non-  
55 pharm intervention\* OR non-pharmaceutical intervention\* OR Shield OR N99 OR N97 OR  
56 Ventilator\* OR Space OR spacing or separation OR "Communicable Disease Control" OR  
57 "Primary Prevention" OR facemask\* OR face mask\* OR face-mask\* OR "Delivery of Health  
58 Care" OR "Disease transmission" OR "Infectious Disease Transmission" OR PPE OR  
59  
60

1  
2  
3 "Personal Protective Equipment" OR mask\* OR virucide\* OR antiviral agent\* OR  
4 Handwashing OR "Hand washing" OR "Hand Disinfection" OR "hand hygiene" OR distancing  
5 OR distances OR aerosol-generating procedure\* OR patient isolation\* OR patient isolator\*  
6 OR person isolator\* OR "individual isolation" OR individual isolator\* OR filtering face piece\*  
7 OR face protection\* OR face shield\* OR face protective device\* OR face protective gear\*  
8 OR eye protection\* OR eye shield\* OR eye protective device\* OR eye protective gear\* OR  
9 Eye mask\* OR airborne precaution\* OR droplet precaution\* OR safety supply OR safety  
10 supplies\* OR safety device\* OR safety equipment\* OR safety measure\* OR safety gear\* OR  
11 protective supply\* OR protective supplies\* OR protective device\* OR protective equipment\*  
12 OR protective measure\* OR protective gear\* OR "personal isolation" OR respirator\* OR  
13 respiratory protection\* OR respiratory protective device\* OR "respiratory protective supply"  
14 OR "respiratory protective supplies" OR "respiratory protective equipment" OR "respiratory  
15 protective gear" OR "safely equipped" OR meter OR metre OR foot OR feet OR meters OR  
16 metres OR head cover\* OR face cover\* OR eye cover\* OR goggle\* OR protective clothing\*  
17  
18  
19  
20 300480  
21

22 #6 MeSH descriptor: [Infection Control] explode all trees 1147  
23  
24 #7 MeSH descriptor: [Personal Protective Equipment] explode all trees 2284  
25  
26 #8 MeSH descriptor: [Hand Disinfection] explode all trees 378  
27  
28 #9 MeSH descriptor: [Communicable Disease Control] explode all trees 4791  
29  
30 #10 MeSH descriptor: [Disease Transmission, Infectious] explode all trees 856  
31  
32 #11 MeSH descriptor: [Primary Prevention] explode all trees 4005  
33  
34 #12 MeSH descriptor: [Delivery of Health Care] explode all trees 44666  
35  
36 #13 MeSH descriptor: [Fomites] explode all trees 9  
37  
38 #14 MeSH descriptor: [Ventilators, Mechanical] explode all trees 264  
39  
40 #15 MeSH descriptor: [Patient Isolation] explode all trees 51  
41  
42 #16 MeSH descriptor: [Patient Safety] explode all trees 580  
43  
44 #17 MeSH descriptor: [Patient Harm] explode all trees 3  
45  
46 #18 #5 OR #6 OR #7 OR #8 OR #9 OR #10 OR #11 OR #12 OR #13 OR #14 OR #15  
47 OR #16 OR #17 336372  
48  
49 #19 #18 AND #4 651  
50  
51  
52 #20 residential facilit\* OR residential aged care OR Convalescent home OR Nursing  
53 home\* OR Homes for the aged OR Housing for the elderly OR Skilled nursing facilit\* OR  
54 Long term care OR Longterm care OR Home\* for the aged OR old age home OR Long-term  
55 care 121379  
56  
57  
58  
59  
60

- 1  
2  
3 #21 MeSH descriptor: [Long-Term Care] explode all trees 1112  
4  
5 #22 MeSH descriptor: [Nursing Homes] explode all trees 1314  
6  
7 #23 MeSH descriptor: [Residential Facilities] explode all trees 1711  
8  
9 #24 MeSH descriptor: [Housing for the Elderly] explode all trees 39  
10  
11  
12 #25 #20 OR #21 OR #22 OR #23 OR #24 121450  
13  
14 #26 Mortality OR "Death rate\*" OR "Mortality Rate\*" OR Morbidity OR "Risk of Infection"  
15 OR "infection risk" 111129  
16  
17 #27 MeSH descriptor: [Mortality] explode all trees 12838  
18  
19 #28 MeSH descriptor: [Morbidity] explode all trees 14392  
20  
21  
22 #29 #26 OR #27 OR #28 124060  
23  
24 #30 #19 AND #25 AND #29  
25  
26  
27  
28  
29  
30

31 Medrxiv

32  
33 "((COVID-19 OR SARS-CoV-2) And ("Infection control")) AND (Mortality) AND ("nursing  
34 homes")"  
35  
36  
37  
38  
39  
40  
41  
42  
43  
44  
45  
46  
47  
48  
49  
50  
51  
52  
53  
54  
55  
56  
57  
58  
59  
60

Supplemental Table 2. Quality Review

|                            |                          | <i>SI</i> | <i>S2</i> | <i>3.1</i> | <i>3.2</i> | <i>3.3</i> | <i>3.4</i> | <i>3.5</i> | <i>4.1</i> | <i>4.2</i> | <i>4.3</i> | <i>4.4</i> | <i>4.5</i> | <i>Comments</i>                                                                                                      |
|----------------------------|--------------------------|-----------|-----------|------------|------------|------------|------------|------------|------------|------------|------------|------------|------------|----------------------------------------------------------------------------------------------------------------------|
| <b>Abrams (2020)</b>       | Quantitative descriptive | Y         | Y         |            |            |            |            |            | Y          | CT         | Y          | CT         | Y          |                                                                                                                      |
| <b>Arons (2020)</b>        | Quantitative descriptive | Y         | Y         |            |            |            |            |            | Y          | Y          | Y          | N          | Y          |                                                                                                                      |
| <b>Blackman 2020</b>       | Quantitative descriptive | Y         | Y         |            |            |            |            |            | Y          | N          | Y          | CT         | Y*         | *Data very limited to descriptive statistics (counts)                                                                |
| <b>Borras-Bermejo 2020</b> | Quantitative descriptive | Y         | Y         |            |            |            |            |            | Y          | CT         | Y          | N          | Y*         | *Data minimal descriptive statistics. Reported as a brief letter.                                                    |
| <b>Brainard (2020)</b>     | Non-randomised           | Y         | Y         | CT         | Y          | Y          | CT         | Y          |            |            |            |            |            |                                                                                                                      |
| <b>Brown (2021)</b>        | Non-randomised           | Y         | Y         | Y          | Y          | Y          | N          | Y          | Y          | Y          | Y          | Y          | Y          |                                                                                                                      |
| <b>Burton (2020)</b>       | Quantitative descriptive | Y         | Y         |            |            |            |            |            | Y          | Y          | Y          | Y          | Y          |                                                                                                                      |
| <b>Dora (2020)</b>         | Quantitative descriptive | Y         | Y         |            |            |            |            |            | Y          | Y          | Y          | Y          | Y*         | *Data reporting descriptive data from an outbreak (counts and percentages)                                           |
| <b>Dutey-Magni (2021)</b>  | Non-randomised           | Y         | Y         | Y          | Y          | Y          | N          | Y          |            |            |            |            |            |                                                                                                                      |
| <b>Eckhardt (2020)</b>     | Quantitative descriptive | Y         | Y         |            |            |            |            |            | Y          | Y          | Y          | Y          | Y*         | *Limited descriptive data (point prevalence data, counts & percentages)                                              |
| <b>Feaster (2020)</b>      | Quantitative descriptive | Y         | Y         |            |            |            |            |            | Y          | Y          | Y          | Y          | Y          |                                                                                                                      |
| <b>Fisman (2020b)</b>      | Non-randomised           | Y         | Y         | Y          | Y          | Y          | N          | Y          |            |            |            |            |            |                                                                                                                      |
| <b>Graham (2020)</b>       | Quantitative descriptive | Y         | Y         |            |            |            |            |            | Y          | N          | Y          | Y          | Y          |                                                                                                                      |
| <b>Guery (2020)</b>        | Quantitative descriptive | Y         | Y         |            |            |            |            |            | Y          | Y          | Y          | Y          | Y*         | *Limited descriptive data reported. Outbreak reported as a published letter. Research letter reporting minimal data. |
| <b>Hand (2018)</b>         | Quantitative descriptive | Y         | CT        |            |            |            |            |            |            |            |            |            |            |                                                                                                                      |
| <b>Harris (2020)</b>       | Quantitative descriptive | Y         | Y         |            |            |            |            |            | Y          | Y          | Y          | Y          | Y*         | *Data limited to descriptive statistics                                                                              |
| <b>Heung (2006)</b>        | Quantitative descriptive | Y         | Y         |            |            |            |            |            | Y          | Y          | Y          | N          | Y*         | *Limited descriptive data                                                                                            |
| <b>Ho (2003)</b>           | Quantitative descriptive | Y         | CT        |            |            |            |            |            |            |            |            |            |            | Report of conference symposium. Limited details                                                                      |
| <b>Hoxha 2020</b>          | Quantitative descriptive | Y         | Y         |            |            |            |            |            | Y          | Y          | Y          | CT         | Y          |                                                                                                                      |
| <b>Iritani 2020</b>        | Non-randomised           | Y         | Y         | N          | CT         | Y          | Y          | CT         |            |            |            |            |            |                                                                                                                      |
| <b>Kennelly (2021)</b>     | Quantitative descriptive | Y         | Y         |            |            |            |            |            | CT         | Y          | Y          | N          | Y          |                                                                                                                      |
| <b>Kim (2020)</b>          | Quantitative descriptive | Y         | CT        |            |            |            |            |            | N          | N          | N          | N          | N          |                                                                                                                      |
| <b>Kimball (2020)</b>      | Quantitative descriptive | Y         | Y         |            |            |            |            |            | Y          | Y          | Y          | Y          | Y*         | *Data limited to descriptive statistics (counts/ percentages) brief report                                           |

|                                              |                                        |   |   |    |   |   |    |   |    |    |    |    |    |                                                                     |
|----------------------------------------------|----------------------------------------|---|---|----|---|---|----|---|----|----|----|----|----|---------------------------------------------------------------------|
| <b>Klein (2020)</b>                          | Quantitative descriptive               | N | N |    |   |   |    |   |    |    |    |    |    | Autopsy reporting                                                   |
| <b>Lennon (2020) +</b>                       | Quantitative descriptive               | Y | Y |    |   |   |    |   | Y  | CT | Y  | Y  | Y  |                                                                     |
| <b>Louie (2020)</b>                          | Quantitative descriptive               | Y | Y |    |   |   |    |   | Y  | Y  | Y  | Y  | Y* | *Data limited to descriptive statistics presented in a brief report |
| <b>McMichael (2020b)</b>                     | Quantitative descriptive               | Y | Y |    |   |   |    |   | Y  | Y  | Y  | N  | Y* | *Data limited to descriptive statistics                             |
| <b>Office for National Statistics (2020)</b> | Quantitative descriptive               | Y | Y |    |   |   |    |   | Y  | CT | Y  | CT | Y  |                                                                     |
| <b>Patel (2020)</b>                          | Longitudinal, Descriptive quantitative | Y | Y |    |   |   |    |   | Y  | Y  | Y  | Y  | Y  |                                                                     |
| <b>Quicke (2020) +</b>                       | Quantitative descriptive               | Y | Y |    |   |   |    |   | CT | CT | CT | CT | Y  | Limited data reported and virologic assay.                          |
| <b>Quigley (2020)</b>                        | Quantitative descriptive               | Y | Y |    |   |   |    |   | Y  | N  | Y  | N  | Y* | *Limited descriptive data reported in a research letter             |
| <b>Roxby (2020) JAMA</b>                     | Quantitative descriptive               | Y | Y |    |   |   |    |   | Y  | Y  | Y  | Y  | Y* | *Descriptive data reported                                          |
| <b>Sacco (2020)</b>                          | Quantitative descriptive               | Y | Y |    |   |   |    |   | Y  | Y  | Y  | Y  | Y  |                                                                     |
| <b>Sanchez (2020)</b>                        | Quantitative descriptive               | Y | Y |    |   |   |    |   | CT | CT | Y  | CT | Y* | *Descriptive data reported on prevalence (counts/ percentages)      |
| <b>Stall (2020) (CMAJ)</b>                   | Non-randomised                         | Y | Y | CT | Y | Y | CT | Y |    |    |    |    |    |                                                                     |
| <b>Stow (2020) +</b>                         | Quantitative descriptive               | Y | Y |    |   |   |    |   | Y  | Y  | Y  | Y  | Y  |                                                                     |
| <b>Telford (2020) +</b>                      | Non-randomised                         | Y | Y | CT | Y | Y | N  | Y |    |    |    |    |    |                                                                     |
| <b>Unruh (2020)</b>                          | Quantitative descriptive               | Y | Y |    |   |   |    |   | Y  | CT | Y  | Y  | Y  |                                                                     |

Y = Yes, N= No, CT= Can't tell

+ pre published manuscript available

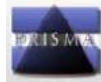

# PRISMA 2009 Checklist

| Section/topic                      | #  | Checklist item                                                                                                                                                                                                                                                                                              | Reported on page #     |
|------------------------------------|----|-------------------------------------------------------------------------------------------------------------------------------------------------------------------------------------------------------------------------------------------------------------------------------------------------------------|------------------------|
| <b>TITLE</b>                       |    |                                                                                                                                                                                                                                                                                                             |                        |
| Title                              | 1  | Identify the report as a systematic review, meta-analysis, or both.                                                                                                                                                                                                                                         | 1                      |
| <b>ABSTRACT</b>                    |    |                                                                                                                                                                                                                                                                                                             |                        |
| Structured summary                 | 2  | Provide a structured summary including, as applicable: background; objectives; data sources; study eligibility criteria, participants, and interventions; study appraisal and synthesis methods; results; limitations; conclusions and implications of key findings; systematic review registration number. | 2                      |
| <b>INTRODUCTION</b>                |    |                                                                                                                                                                                                                                                                                                             |                        |
| Rationale                          | 3  | Describe the rationale for the review in the context of what is already known.                                                                                                                                                                                                                              | 3                      |
| Objectives                         | 4  | Provide an explicit statement of questions being addressed with reference to participants, interventions, comparisons, outcomes, and study design (PICOS).                                                                                                                                                  | 4                      |
| <b>METHODS</b>                     |    |                                                                                                                                                                                                                                                                                                             |                        |
| Protocol and registration          | 5  | Indicate if a review protocol exists, if and where it can be accessed (e.g., Web address), and, if available, provide registration information including registration number.                                                                                                                               | 4                      |
| Eligibility criteria               | 6  | Specify study characteristics (e.g., PICOS, length of follow-up) and report characteristics (e.g., years considered, language, publication status) used as criteria for eligibility, giving rationale.                                                                                                      | 5                      |
| Information sources                | 7  | Describe all information sources (e.g., databases with dates of coverage, contact with study authors to identify additional studies) in the search and date last searched.                                                                                                                                  | 4                      |
| Search                             | 8  | Present full electronic search strategy for at least one database, including any limits used, such that it could be repeated.                                                                                                                                                                               | Supplementary material |
| Study selection                    | 9  | State the process for selecting studies (i.e., screening, eligibility, included in systematic review, and, if applicable, included in the meta-analysis).                                                                                                                                                   | 5, 6                   |
| Data collection process            | 10 | Describe method of data extraction from reports (e.g., piloted forms, independently, in duplicate) and any processes for obtaining and confirming data from investigators.                                                                                                                                  | 5                      |
| Data items                         | 11 | List and define all variables for which data were sought (e.g., PICOS, funding sources) and any assumptions and simplifications made.                                                                                                                                                                       | 5                      |
| Risk of bias in individual studies | 12 | Describe methods used for assessing risk of bias of individual studies (including specification of whether this was done at the study or outcome level), and how this information is to be used in any data synthesis.                                                                                      | 6                      |
| Summary measures                   | 13 | State the principal summary measures (e.g., risk ratio, difference in means).                                                                                                                                                                                                                               | 6                      |
| Synthesis of results               | 14 | Describe the methods of handling data and combining results of studies, if done, including measures of consistency (e.g., $I^2$ ) for each meta-analysis.                                                                                                                                                   | 6                      |





# PRISMA 2009 Checklist

Page 1 of 2

| Section/topic                 | #  | Checklist item                                                                                                                                                                                           | Reported on page #    |
|-------------------------------|----|----------------------------------------------------------------------------------------------------------------------------------------------------------------------------------------------------------|-----------------------|
| Risk of bias across studies   | 15 | Specify any assessment of risk of bias that may affect the cumulative evidence (e.g., publication bias, selective reporting within studies).                                                             | 6                     |
| Additional analyses           | 16 | Describe methods of additional analyses (e.g., sensitivity or subgroup analyses, meta-regression), if done, indicating which were pre-specified.                                                         | N/A                   |
| <b>RESULTS</b>                |    |                                                                                                                                                                                                          |                       |
| Study selection               | 17 | Give numbers of studies screened, assessed for eligibility, and included in the review, with reasons for exclusions at each stage, ideally with a flow diagram.                                          | 6, figure 1           |
| Study characteristics         | 18 | For each study, present characteristics for which data were extracted (e.g., study size, PICOS, follow-up period) and provide the citations.                                                             | 6                     |
| Risk of bias within studies   | 19 | Present data on risk of bias of each study and, if available, any outcome level assessment (see item 12).                                                                                                | Supplementary table 2 |
| Results of individual studies | 20 | For all outcomes considered (benefits or harms), present, for each study: (a) simple summary data for each intervention group (b) effect estimates and confidence intervals, ideally with a forest plot. | 17-33                 |
| Synthesis of results          | 21 | Present results of each meta-analysis done, including confidence intervals and measures of consistency.                                                                                                  | N/A                   |
| Risk of bias across studies   | 22 | Present results of any assessment of risk of bias across studies (see Item 15).                                                                                                                          | Supplementary table 2 |
| Additional analysis           | 23 | Give results of additional analyses, if done (e.g., sensitivity or subgroup analyses, meta-regression [see Item 16]).                                                                                    | N/A                   |
| <b>DISCUSSION</b>             |    |                                                                                                                                                                                                          |                       |
| Summary of evidence           | 24 | Summarize the main findings including the strength of evidence for each main outcome; consider their relevance to key groups (e.g., healthcare providers, users, and policy makers).                     | 33-35                 |
| Limitations                   | 25 | Discuss limitations at study and outcome level (e.g., risk of bias), and at review-level (e.g., incomplete retrieval of identified research, reporting bias).                                            | 35                    |
| Conclusions                   | 26 | Provide a general interpretation of the results in the context of other evidence, and implications for future research.                                                                                  | 35                    |
| <b>FUNDING</b>                |    |                                                                                                                                                                                                          |                       |
| Funding                       | 27 | Describe sources of funding for the systematic review and other support (e.g., supply of data); role of funders for the systematic review.                                                               | 35                    |

From: Moher D, Liberati A, Tetzlaff J, Altman DG, The PRISMA Group (2009). Preferred Reporting Items for Systematic Reviews and Meta-Analyses: The PRISMA Statement. PLoS Med 6(7): e1000097. doi:10.1371/journal.pmed1000097

For more information, visit: [www.prisma-statement.org](http://www.prisma-statement.org).

For peer review only - <http://bmjopen.bmj.com/site/about/guidelines.xhtml>
