# Supplementary material for: A rapid systematic review of measures to protect older people in long-term care facilities from COVID-19
Source: PubMed Central journal article supplement — BMJ Open. 2021 Oct 17;11(10):e047012. doi: 10.1136/bmjopen-2020-047012 (PMC8523961; doi:10.1136/bmjopen-2020-047012), 2021-10-17
Supplement: bmjopen-2020-047012supp002.pdf [file bmjopen-2020-047012supp002.pdf]

Supplemental Table 2. Quality Review

|                            |                          | <i>S1</i> | <i>S2</i> | <i>3.1</i> | <i>3.2</i> | <i>3.3</i> | <i>3.4</i> | <i>3.5</i> | <i>4.1</i> | <i>4.2</i> | <i>4.3</i> | <i>4.4</i> | <i>4.5</i> | <i>Comments</i>                                                                                                      |
|----------------------------|--------------------------|-----------|-----------|------------|------------|------------|------------|------------|------------|------------|------------|------------|------------|----------------------------------------------------------------------------------------------------------------------|
| <b>Abrams (2020)</b>       | Quantitative descriptive | Y         | Y         |            |            |            |            |            | Y          | CT         | Y          | CT         | Y          |                                                                                                                      |
| <b>Arons (2020)</b>        | Quantitative descriptive | Y         | Y         |            |            |            |            |            | Y          | Y          | Y          | N          | Y          |                                                                                                                      |
| <b>Blackman 2020</b>       | Quantitative descriptive | Y         | Y         |            |            |            |            |            | Y          | N          | Y          | CT         | Y*         | *Data very limited to descriptive statistics (counts)                                                                |
| <b>Borras-Bermejo 2020</b> | Quantitative descriptive | Y         | Y         |            |            |            |            |            | Y          | CT         | Y          | N          | Y*         | *Data minimal descriptive statistics. Reported as a brief letter.                                                    |
| <b>Brainard (2020)</b>     | Non-randomised           | Y         | Y         | CT         | Y          | Y          | CT         | Y          |            |            |            |            |            |                                                                                                                      |
| <b>Brown (2021)</b>        | Non-randomised           | Y         | Y         | Y          | Y          | Y          | N          | Y          | Y          | Y          | Y          | Y          | Y          |                                                                                                                      |
| <b>Burton (2020)</b>       | Quantitative descriptive | Y         | Y         |            |            |            |            |            | Y          | Y          | Y          | Y          | Y          |                                                                                                                      |
| <b>Dora (2020)</b>         | Quantitative descriptive | Y         | Y         |            |            |            |            |            | Y          | Y          | Y          | Y          | Y*         | *Data reporting descriptive data from an outbreak (counts and percentages)                                           |
| <b>Dutey-Magni (2021)</b>  | Non-randomised           | Y         | Y         | Y          | Y          | Y          | N          | Y          |            |            |            |            |            |                                                                                                                      |
| <b>Eckhardt (2020)</b>     | Quantitative descriptive | Y         | Y         |            |            |            |            |            | Y          | Y          | Y          | Y          | Y*         | *Limited descriptive data (point prevalence data, counts & percentages)                                              |
| <b>Feaster (2020)</b>      | Quantitative descriptive | Y         | Y         |            |            |            |            |            | Y          | Y          | Y          | Y          | Y          |                                                                                                                      |
| <b>Fisman (2020b)</b>      | Non-randomised           | Y         | Y         | Y          | Y          | Y          | N          | Y          |            |            |            |            |            |                                                                                                                      |
| <b>Graham (2020)</b>       | Quantitative descriptive | Y         | Y         |            |            |            |            |            | Y          | N          | Y          | Y          | Y          |                                                                                                                      |
| <b>Guery (2020)</b>        | Quantitative descriptive | Y         | Y         |            |            |            |            |            | Y          | Y          | Y          | Y          | Y*         | *Limited descriptive data reported. Outbreak reported as a published letter. Research letter reporting minimal data. |
| <b>Hand (2018)</b>         | Quantitative descriptive | Y         | CT        |            |            |            |            |            |            |            |            |            |            |                                                                                                                      |
| <b>Harris (2020)</b>       | Quantitative descriptive | Y         | Y         |            |            |            |            |            | Y          | Y          | Y          | Y          | Y*         | *Data limited to descriptive statistics                                                                              |
| <b>Heung (2006)</b>        | Quantitative descriptive | Y         | Y         |            |            |            |            |            | Y          | Y          | Y          | N          | Y*         | *Limited descriptive data                                                                                            |
| <b>Ho (2003)</b>           | Quantitative descriptive | Y         | CT        |            |            |            |            |            |            |            |            |            |            | Report of conference symposium. Limited details                                                                      |
| <b>Hoxha 2020</b>          | Quantitative descriptive | Y         | Y         |            |            |            |            |            | Y          | Y          | Y          | CT         | Y          |                                                                                                                      |
| <b>Iritani 2020</b>        | Non-randomised           | Y         | Y         | N          | CT         | Y          | Y          | CT         |            |            |            |            |            |                                                                                                                      |
| <b>Kennelly (2021)</b>     | Quantitative descriptive | Y         | Y         |            |            |            |            |            | CT         | Y          | Y          | N          | Y          |                                                                                                                      |
| <b>Kim (2020)</b>          | Quantitative descriptive | Y         | CT        |            |            |            |            |            | N          | N          | N          | N          | N          |                                                                                                                      |
| <b>Kimball (2020)</b>      | Quantitative descriptive | Y         | Y         |            |            |            |            |            | Y          | Y          | Y          | Y          | Y*         | *Data limited to descriptive statistics (counts/ percentages) brief report                                           |

|                                              |                                           |   |   |    |   |   |    |   |    |    |    |    |    |                                                                     |
|----------------------------------------------|-------------------------------------------|---|---|----|---|---|----|---|----|----|----|----|----|---------------------------------------------------------------------|
| <b>Klein (2020)</b>                          | Quantitative descriptive                  | N | N |    |   |   |    |   |    |    |    |    |    | Autopsy reporting                                                   |
| <b>Lennon (2020) +</b>                       | Quantitative descriptive                  | Y | Y |    |   |   |    |   | Y  | CT | Y  | Y  | Y  |                                                                     |
| <b>Louie (2020)</b>                          | Quantitative descriptive                  | Y | Y |    |   |   |    |   | Y  | Y  | Y  | Y  | Y* | *Data limited to descriptive statistics presented in a brief report |
| <b>McMichael (2020b)</b>                     | Quantitative descriptive                  | Y | Y |    |   |   |    |   | Y  | Y  | Y  | N  | Y* | *Data limited to descriptive statistics                             |
| <b>Office for National Statistics (2020)</b> | Quantitative descriptive                  | Y | Y |    |   |   |    |   | Y  | CT | Y  | CT | Y  |                                                                     |
| <b>Patel (2020)</b>                          | Longitudinal,<br>Descriptive quantitative | Y | Y |    |   |   |    |   | Y  | Y  | Y  | Y  | Y  |                                                                     |
| <b>Quicke (2020) +</b>                       | Quantitative descriptive                  | Y | Y |    |   |   |    |   | CT | CT | CT | CT | Y  | Limited data reported and virologic assay.                          |
| <b>Quigley (2020)</b>                        | Quantitative descriptive                  | Y | Y |    |   |   |    |   | Y  | N  | Y  | N  | Y* | *Limited descriptive data reported in a research letter             |
| <b>Roxby (2020) JAMA</b>                     | Quantitative descriptive                  | Y | Y |    |   |   |    |   | Y  | Y  | Y  | Y  | Y* | *Descriptive data reported                                          |
| <b>Sacco (2020)</b>                          | Quantitative descriptive                  | Y | Y |    |   |   |    |   | Y  | Y  | Y  | Y  | Y  |                                                                     |
| <b>Sanchez (2020)</b>                        | Quantitative descriptive                  | Y | Y |    |   |   |    |   | CT | CT | Y  | CT | Y* | *Descriptive data reported on prevalence (counts/ percentages)      |
| <b>Stall (2020) (CMAJ)</b>                   | Non-randomised                            | Y | Y | CT | Y | Y | CT | Y |    |    |    |    |    |                                                                     |
| <b>Stow (2020) +</b>                         | Quantitative descriptive                  | Y | Y |    |   |   |    |   | Y  | Y  | Y  | Y  | Y  |                                                                     |
| <b>Telford (2020) +</b>                      | Non-randomised                            | Y | Y | CT | Y | Y | N  | Y |    |    |    |    |    |                                                                     |
| <b>Unruh (2020)</b>                          | Quantitative descriptive                  | Y | Y |    |   |   |    |   | Y  | CT | Y  | Y  | Y  |                                                                     |

Y = Yes, N= No, CT= Can't tell

+ pre published manuscript available
